# Supplementary material for: Widespread context dependency of microRNA-mediated regulation
Source: HighWire-hosted journal article supplement (doi:10.1101/gr.166702.113), 2014-03-25
Supplement: Supplemental_Tables.xlsx [file Supplemental_Tables.xlsx]

## Sheet: S1
Supplementary Table S1:
PAR-CLIP data including genomic position, PARma microRNA assignment and scores, normalized quantifications and gene mapping. Splice junctions are specified using the pipe symbol (|); The Cscore indicates the reliability of the target site itself, the MA score reflects the confidence of the microRNA assignment (both between 0 and 1, the higher the better); Exclusive target sites are defined as fol…
Genomic.position	miRNA.family.with.Seed	Cscore	MAscore	Gene	Transcript	Type	DG75_A.quanti	DG75_B.quanti	BCBL1_A.quanti	BCBL1_B.quanti	BC1_A.quanti	BC1_B.quanti	BC3_A.quanti	BC3_B.quanti	DG75.exclusive.cellular.microRNA	BCBL1.exclusive.cellular.microRNA	BC13.exclusive.viral.microRNA	BCBL1.exclusive.viral.microRNA	Associated.Gene.Name	Description	Gene.Biotype
chr1+:100330129-100330145|100335955-100335965	AGCAGCA vertebrate UGCUGCU hsa-miR-15a(7mer-m8) hsa-miR-16(7mer-m8) hsa-miR-15b(7mer-m8) hsa-miR-195(7mer-m8) hsa-miR-424(7mer-m8) hsa-miR-497(7mer-m8)	0.7662	0.9077	ENSG00000162688	ENST00000311030	CDS	15.7256	8.13354	6.56722	1	25.3305	28.8751	70.4396	32.1367					AGL	amylo-alpha-1, 6-glucosidase, 4-alpha-glucanotransferase [Source:HGNC Symbol;Acc:321]	protein_coding
chr1+:100387154-100387199	UAAAGUG vertebrate CACUUUA hsa-miR-17(7mer-A1) hsa-miR-20a(7mer-A1) hsa-miR-93(7mer-A1) hsa-miR-106a(7mer-A1) hsa-miR-106b(7mer-A1) hsa-miR-20b(7mer-A1) hsa-miR-526b*(7mer-A1) hsa-miR-519d(7mer-A1) hsa-miR-3609(7mer-A1)	0.3532	0.7472	ENSG00000162688	ENST00000311030	CDS	0	8.13354	0	1	1.58316	0	0	3.21367					AGL	amylo-alpha-1, 6-glucosidase, 4-alpha-glucanotransferase [Source:HGNC Symbol;Acc:321]	protein_coding
chr1+:100524279-100524284|100525433-100525479	AGCACCA vertebrate UGGUGCU hsa-miR-29a(7mer-m8) hsa-miR-29b(7mer-m8) hsa-miR-29c(7mer-m8)	0.5564	0.8277	ENSG00000156875	ENST00000370152	CDS	5.24187	32.5342	4.37815	6	0	0	0	0					HIAT1	hippocampus abundant transcript 1 [Source:HGNC Symbol;Acc:23363]	protein_coding
chr1+:100525460-100525541	AGCAGCA vertebrate UGCUGCU hsa-miR-15a(7mer-m8) hsa-miR-16(7mer-m8) hsa-miR-15b(7mer-m8) hsa-miR-195(7mer-m8) hsa-miR-424(7mer-m8) hsa-miR-497(7mer-m8)	0.9326	0.982	ENSG00000156875	ENST00000370152	CDS	120.563	154.537	52.5378	56	341.962	378.416	231.444	196.034					HIAT1	hippocampus abundant transcript 1 [Source:HGNC Symbol;Acc:23363]	protein_coding
chr1+:100535202-100535241|100542720-100542734	UGUGCAA vertebrate UUGCACA hsa-miR-19a(7mer-A1) hsa-miR-19b(7mer-A1)	0.5553	0.9312	ENSG00000156875	ENST00000370152	CDS	5.24187	4.06677	0	1	3.16632	3.03948	0	0					HIAT1	hippocampus abundant transcript 1 [Source:HGNC Symbol;Acc:23363]	protein_coding
chr1+:100548322-100548371	GUAGUGA no UCACUA hsa-miR-921(6mer) hsa-miR-3606(6mer) CACUAC hsa-miR-142-3p(6mer)	0.9199	0.881	ENSG00000156875	ENST00000370152	3'UTR	125.805	162.671	126.966	133	120.32	100.303	43.6054	38.5641					HIAT1	hippocampus abundant transcript 1 [Source:HGNC Symbol;Acc:23363]	protein_coding
chr1+:100548425-100548494	AAUAGUG no ACUAUU hsa-miR-633(6mer-m8)	0.8164	0.9874	ENSG00000156875	ENST00000370152	3'UTR	5.24187	4.06677	0	5	20.5811	24.3159	3.35426	6.42735					HIAT1	hippocampus abundant transcript 1 [Source:HGNC Symbol;Acc:23363]	protein_coding
chr1+:100548586-100548647	UAAAGUG vertebrate CACUUUA hsa-miR-17(7mer-A1) hsa-miR-20a(7mer-A1) hsa-miR-93(7mer-A1) hsa-miR-106a(7mer-A1) hsa-miR-106b(7mer-A1) hsa-miR-20b(7mer-A1) hsa-miR-526b*(7mer-A1) hsa-miR-519d(7mer-A1) hsa-miR-3609(7mer-A1)	0.8135	0.6958	ENSG00000156875	ENST00000370152	3'UTR	31.4512	8.13354	8.7563	13	4.74948	6.07896	0	0					HIAT1	hippocampus abundant transcript 1 [Source:HGNC Symbol;Acc:23363]	protein_coding
chr1+:100548813-100548867	UGAGUGU weakly ACACUCA hsa-miR-574-5p(7mer-A1) hsa-miR-3659(7mer-A1)	0.7486	0.9998	ENSG00000156875	ENST00000370152	3'UTR	0	0	8.7563	2	9.49896	7.59871	3.35426	3.21367					HIAT1	hippocampus abundant transcript 1 [Source:HGNC Symbol;Acc:23363]	protein_coding
chr1+:100605984-100606031	AAGUGCA weakly UGCACUU hsa-miR-519c-3p(7mer-m8) hsa-miR-519b-3p(7mer-m8) hsa-miR-519a(7mer-m8)	0.8126	0.8901	ENSG00000122435	ENST00000370141	CDS	15.7256	36.6009	13.1344	22	3.16632	0	0	0					CCDC76	coiled-coil domain containing 76 [Source:HGNC Symbol;Acc:25502]	protein_coding
chr1+:100736128-100736175	AGCAGCA vertebrate UGCUGCU hsa-miR-15a(7mer-m8) hsa-miR-16(7mer-m8) hsa-miR-15b(7mer-m8) hsa-miR-195(7mer-m8) hsa-miR-424(7mer-m8) hsa-miR-497(7mer-m8)	0.6337	0.9957	ENSG00000137996	ENST00000370128	CDS	15.7256	24.4006	0	5	15.8316	6.07896	6.70853	3.21367					RTCD1	RNA terminal phosphate cyclase domain 1 [Source:HGNC Symbol;Acc:17981]	protein_coding
chr1+:100757198-100757237	AAAGUGA weakly UCACUUU hsa-miR-3609(7mer-m8)	0.223	0.9964	ENSG00000137996	ENST00000370128	3'UTR	10.4837	24.4006	15.3235	1	0	0	0	0					RTCD1	RNA terminal phosphate cyclase domain 1 [Source:HGNC Symbol;Acc:17981]	protein_coding
chr1+:100757303-100757327	GUGUAAA no UUUACA hsa-miR-3607-3p(6mer-m8)	0.6764	0.6432	ENSG00000137996	ENST00000370128	3'UTR	26.2094	16.2671	2.18907	0	0	0	0	0					RTCD1	RNA terminal phosphate cyclase domain 1 [Source:HGNC Symbol;Acc:17981]	protein_coding
chr1+:10093563-10093598	GAGGUUA no UAACCU hsa-miR-154(6mer) AACCUC hsa-miR-377*(6mer)	0.1369	0.9681	ENSG00000130939	ENST00000377157	5'UTR	0	16.2671	0	0	0	0	0	0					UBE4B	ubiquitination factor E4B (UFD2 homolog, yeast) [Source:HGNC Symbol;Acc:12500]	protein_coding
chr1+:101431341-101431405	AUAAAGU weakly ACUUUAU hsa-miR-142-5p(7mer-m8)	0.1395	0.7989	ENSG00000162695	ENST00000370112	CDS	20.9675	12.2003	4.37815	2	3.16632	3.03948	0	0					SLC30A7	solute carrier family 30 (zinc transporter), member 7 [Source:HGNC Symbol;Acc:19306]	protein_coding
chr1+:101440488-101440536	UGUAGUG vertebrate CACUACA hsa-miR-142-3p(7mer-A1)	0.3568	0.8457	ENSG00000162695	ENST00000357650	3'UTR	41.935	32.5342	28.458	11	0	0	3.35426	19.282					SLC30A7	solute carrier family 30 (zinc transporter), member 7 [Source:HGNC Symbol;Acc:19306]	protein_coding
chr1+:101443813-101443864	GUGCAAA vertebrate UUUGCAC hsa-miR-19a(7mer-m8) hsa-miR-19b(7mer-m8)	0.6142	0.9228	ENSG00000162695	ENST00000370112	3'UTR	15.7256	20.3339	2.18907	3	0	0	0	0					SLC30A7	solute carrier family 30 (zinc transporter), member 7 [Source:HGNC Symbol;Acc:19306]	protein_coding
chr1+:101445997-101446050	AGGAUGC no GCAUCCU kshv-miR-K12-5(7mer-m8)	0.9914	0.9838	ENSG00000162695	ENST00000370112	3'UTR	0	0	0	1	31.6632	19.7566	70.4396	51.4188			x		SLC30A7	solute carrier family 30 (zinc transporter), member 7 [Source:HGNC Symbol;Acc:19306]	protein_coding
chr1+:101446160-101446200	GUGCAAA vertebrate UUUGCAC hsa-miR-19a(7mer-m8) hsa-miR-19b(7mer-m8)	0.099	0.896	ENSG00000162695	ENST00000370112	3'UTR	5.24187	4.06677	0	2	0	6.07896	6.70853	0					SLC30A7	solute carrier family 30 (zinc transporter), member 7 [Source:HGNC Symbol;Acc:19306]	protein_coding
chr1+:101446483-101446532	UGUAGUG vertebrate CACUACA hsa-miR-142-3p(7mer-A1)	0.3433	0.8756	ENSG00000162695	ENST00000370112	3'UTR	31.4512	8.13354	21.8907	11	0	0	0	0					SLC30A7	solute carrier family 30 (zinc transporter), member 7 [Source:HGNC Symbol;Acc:19306]	protein_coding
chr1+:101446945-101446987	GAGGUAA no UACCUC hsa-let-7a(6mer) hsa-let-7b(6mer) hsa-let-7c(6mer) hsa-let-7d(6mer) hsa-let-7e(6mer) hsa-let-7f(6mer) hsa-miR-98(6mer) hsa-let-7g(6mer) hsa-let-7i(6mer) hsa-miR-202(6mer)	0.8947	0.8864	ENSG00000162695	ENST00000370112	3'UTR	52.4187	52.868	4.37815	12	3.16632	1.51974	0	0					SLC30A7	solute carrier family 30 (zinc transporter), member 7 [Source:HGNC Symbol;Acc:19306]	protein_coding
chr1+:101704671-101704723	AGCAGCA vertebrate UGCUGCU hsa-miR-15a(7mer-m8) hsa-miR-16(7mer-m8) hsa-miR-15b(7mer-m8) hsa-miR-195(7mer-m8) hsa-miR-424(7mer-m8) hsa-miR-497(7mer-m8)	0.7528	0.9427	ENSG00000170989	ENST00000305352	CDS	0	0	0	3	7.9158	9.11845	13.4171	19.282					S1PR1	sphingosine-1-phosphate receptor 1 [Source:HGNC Symbol;Acc:3165]	protein_coding
chr1+:101706176-101706205	UAUAAAG mammals CUUUAUA hsa-miR-142-5p(7mer-A1) hsa-miR-340(7mer-m8)	0.4253	0.6438	ENSG00000170989	ENST00000305352	3'UTR	0	0	4.37815	1	6.33264	4.55922	13.4171	12.8547					S1PR1	sphingosine-1-phosphate receptor 1 [Source:HGNC Symbol;Acc:3165]	protein_coding
chr1+:101706988-101707031	GUGCAAA vertebrate UUUGCAC hsa-miR-19a(7mer-m8) hsa-miR-19b(7mer-m8)	0.1791	0.9352	ENSG00000170989	ENST00000305352	3'UTR	0	0	13.1344	28	0	0	16.7713	9.64102					S1PR1	sphingosine-1-phosphate receptor 1 [Source:HGNC Symbol;Acc:3165]	protein_coding
chr1+:10240379-10240422	AGCAGCA vertebrate UGCUGCU hsa-miR-15a(7mer-m8) hsa-miR-16(7mer-m8) hsa-miR-15b(7mer-m8) hsa-miR-195(7mer-m8) hsa-miR-424(7mer-m8) hsa-miR-497(7mer-m8)	0.689	0.9874	ENSG00000130939	ENST00000377157	3'UTR	31.4512	8.13354	4.37815	9	0	0	0	0					UBE4B	ubiquitination factor E4B (UFD2 homolog, yeast) [Source:HGNC Symbol;Acc:12500]	protein_coding
chr1+:10440773-10440827	AGCAGCA vertebrate UGCUGCU hsa-miR-15a(7mer-m8) hsa-miR-16(7mer-m8) hsa-miR-15b(7mer-m8) hsa-miR-195(7mer-m8) hsa-miR-424(7mer-m8) hsa-miR-497(7mer-m8)	0.4345	0.4924	ENSG00000054523	ENST00000353409	3'UTR	0	0	39.4033	14	0	0	0	0		x			KIF1B	kinesin family member 1B [Source:HGNC Symbol;Acc:16636]	protein_coding
chr1+:10440843-10440898	ACUGGCC vertebrate GGCCAGU hsa-miR-193a-3p(7mer-m8) hsa-miR-193b(7mer-m8)	0.2812	1	ENSG00000054523	ENST00000353409	3'UTR	0	0	72.2395	49	0	0	0	0		x			KIF1B	kinesin family member 1B [Source:HGNC Symbol;Acc:16636]	protein_coding
chr1+:109178227-109178275	GUAGUGU vertebrate ACACUAC hsa-miR-142-3p(7mer-m8)	0.9734	0.9148	ENSG00000162636	ENST00000483371	protein_coding	57.6606	109.803	111.643	118	281.802	323.705	97.2737	102.838					FAM102B	family with sequence similarity 102, member B [Source:HGNC Symbol;Acc:27637]	protein_coding
chr1+:109243738-109243775	AGAAUAC no GUAUUCU kshv-miR-K12-4-3p(7mer-m8)	0.0866	0.802	ENSG00000134186	ENST00000370021	3'UTR	0	0	30.647	31	0	0	0	0				x	PRPF38B	PRP38 pre-mRNA processing factor 38 (yeast) domain containing B [Source:HGNC Symbol;Acc:25512]	protein_coding
chr1+:109351654-109351703	AGCAGCA vertebrate UGCUGCU hsa-miR-15a(7mer-m8) hsa-miR-16(7mer-m8) hsa-miR-15b(7mer-m8) hsa-miR-195(7mer-m8) hsa-miR-424(7mer-m8) hsa-miR-497(7mer-m8)	0.8777	0.965	ENSG00000116266	ENST00000370008	3'UTR	5.24187	8.13354	21.8907	20	25.3305	25.8356	3.35426	6.42735					STXBP3	syntaxin binding protein 3 [Source:HGNC Symbol;Acc:11446]	protein_coding
chr1+:109472701-109472748	UAAUGCC vertebrate GGCAUUA hsa-miR-365(7mer-A1)	0.7074	0.6189	ENSG00000121957	ENST00000406462	3'UTR	0	0	2.18907	0	0	4.55922	23.4799	6.42735					GPSM2	G-protein signaling modulator 2 [Source:HGNC Symbol;Acc:29501]	protein_coding
chr1+:109635513-109635573	GUGCAAA vertebrate UUUGCAC hsa-miR-19a(7mer-m8) hsa-miR-19b(7mer-m8)	0.4468	0.9895	ENSG00000215717	ENST00000338272	CDS	20.9675	16.2671	0	1	0	0	0	0					TMEM167B	transmembrane protein 167B [Source:HGNC Symbol;Acc:30187]	protein_coding
chr1+:109635560-109635620	UAGCAGC vertebrate GCUGCUA hsa-miR-15a(7mer-A1) hsa-miR-16(7mer-A1) hsa-miR-15b(7mer-A1) hsa-miR-195(7mer-A1) hsa-miR-424(7mer-A1) hsa-miR-497(7mer-A1) hsa-miR-503(7mer-A1) hsa-miR-646(7mer-A1)	0.7741	0.8314	ENSG00000215717	ENST00000338272	CDS	36.6931	48.8013	6.56722	11	50.6611	57.7502	40.2512	32.1367					TMEM167B	transmembrane protein 167B [Source:HGNC Symbol;Acc:30187]	protein_coding
chr1+:109638925-109638965	CAGGUCC no	0.3136	0.984	ENSG00000215717	ENST00000338272	3'UTR	0	12.2003	0	4	0	0	0	0					TMEM167B	transmembrane protein 167B [Source:HGNC Symbol;Acc:30187]	protein_coding
chr1+:109638965-109639030	GUGCAAA vertebrate UUUGCAC hsa-miR-19a(7mer-m8) hsa-miR-19b(7mer-m8)	0.4834	0.8643	ENSG00000215717	ENST00000338272	3'UTR	31.4512	61.0016	6.56722	3	0	0	0	0					TMEM167B	transmembrane protein 167B [Source:HGNC Symbol;Acc:30187]	protein_coding
chr1+:109770992-109771040	CACAUUC no GAAUGUG kshv-miR-K12-3(7mer-m8)	0.5609	0.6342	ENSG00000031698	ENST00000369923	CDS	0	0	17.5126	16	0	0	0	0					SARS	seryl-tRNA synthetase [Source:HGNC Symbol;Acc:10537]	protein_coding
chr1+:110038692-110038746	ACUGUAG weakly CUACAGU kshv-miR-K12-2(7mer-m8) hsa-miR-1183(7mer-m8)	0.9466	0.9561	ENSG00000174151	ENST00000369865	CDS	0	0	6.56722	2	22.1642	24.3159	120.754	128.547					CYB561D1	cytochrome b-561 domain containing 1 [Source:HGNC Symbol;Acc:26804]	protein_coding
chr1+:110043020-110043044	UAAUGCU vertebrate AGCAUUA hsa-miR-155(7mer-m8) kshv-miR-K12-11(7mer-m8)	0.7151	0.6553	ENSG00000174151	ENST00000369865	3'UTR	0	0	2.18907	0	7.9158	3.03948	26.8341	28.9231					CYB561D1	cytochrome b-561 domain containing 1 [Source:HGNC Symbol;Acc:26804]	protein_coding
chr1+:110125134-110125187|110128837-110128840	AAGGUGA no UCACCUU ebv-miR-BART5(7mer-m8)	0.945	0.9814	ENSG00000065135	ENST00000369851	CDS	15.7256	4.06677	8.7563	4	61.7432	60.7896	3.35426	0					GNAI3	guanine nucleotide binding protein (G protein), alpha inhibiting activity polypeptide 3 [Source:HGNC Symbol;Acc:4387]	protein_coding
chr1+:110135791-110135835	CAAUUUA no UAAAUU hsa-miR-32*(6mer)	0.4738	0.7858	ENSG00000065135	ENST00000369851	3'UTR	0	0	2.18907	1	1.58316	0	6.70853	0					GNAI3	guanine nucleotide binding protein (G protein), alpha inhibiting activity polypeptide 3 [Source:HGNC Symbol;Acc:4387]	protein_coding
chr1+:110563421-110563473	UUUUGUU no AACAAAA ebv-miR-BART19-3p(7mer-A1)	0.0634	1	ENSG00000168710	ENST00000369799	CDS	0	4.06677	0	0	11.0821	1.51974	13.4171	32.1367					AHCYL1	adenosylhomocysteinase-like 1 [Source:HGNC Symbol;Acc:344]	protein_coding
chr1+:11073848-11073898	AGCAGCA vertebrate UGCUGCU hsa-miR-15a(7mer-m8) hsa-miR-16(7mer-m8) hsa-miR-15b(7mer-m8) hsa-miR-195(7mer-m8) hsa-miR-424(7mer-m8) hsa-miR-497(7mer-m8)	0.5996	0.9946	ENSG00000120948	ENST00000240185	CDS	26.2094	8.13354	2.18907	2	0	0	0	0					TARDBP	TAR DNA binding protein [Source:HGNC Symbol;Acc:11571]	protein_coding
chr1+:110776455-110776515	AGGGGCA weakly UGCCCC hsa-miR-486-3p(6mer) GCCCCU hsa-miR-423-5p(6mer-m8) hsa-miR-3184(6mer-m8)	0.1981	0.764	ENSG00000116396	ENST00000369787	3'UTR	10.4837	56.9348	10.9454	6	0	1.51974	0	0					KCNC4	potassium voltage-gated channel, Shaw-related subfamily, member 4 [Source:HGNC Symbol;Acc:6236]	protein_coding
chr1+:11078825-11078873	UGUGUUU no AAACAC hsa-miR-3676(6mer-m8)	0.0066	0.9999	ENSG00000120948	ENST00000240185	CDS	20.9675	20.3339	13.1344	11	0	3.03948	0	0					TARDBP	TAR DNA binding protein [Source:HGNC Symbol;Acc:11571]	protein_coding
chr1+:11083045-11083100	UAAAGAA mammals UUCUUUA hsa-miR-186(7mer-A1) hsa-miR-3133(7mer-A1)	0.2255	0.9423	ENSG00000120948	ENST00000240185	3'UTR	0	4.06677	0	1	0	1.51974	3.35426	0					TARDBP	TAR DNA binding protein [Source:HGNC Symbol;Acc:11571]	protein_coding
chr1+:11083183-11083249	GGGGAGA weakly UCUCCCC hsa-miR-3175(7mer-m8)	0.8161	0.9892	ENSG00000120948	ENST00000240185	3'UTR	5.24187	4.06677	4.37815	12	4.74948	6.07896	120.754	80.3418					TARDBP	TAR DNA binding protein [Source:HGNC Symbol;Acc:11571]	protein_coding
chr1+:11083375-11083444	AGUAGCG no GCUACU hsa-miR-562(6mer-m8)	0.4847	0.9137	ENSG00000120948	ENST00000240185	3'UTR	5.24187	0	0	4	31.6632	53.1909	20.1256	22.4957					TARDBP	TAR DNA binding protein [Source:HGNC Symbol;Acc:11571]	protein_coding
chr1+:110883305-110883333	UUGCUAA weakly	0.7262	1	ENSG00000162775	ENST00000369784	CDS	36.6931	28.4674	0	3	1.58316	0	0	0					RBM15	RNA binding motif protein 15 [Source:HGNC Symbol;Acc:14959]	protein_coding
chr1+:112245984-112246015	GUGCAAA vertebrate UUUGCAC hsa-miR-19a(7mer-m8) hsa-miR-19b(7mer-m8)	0.44	0.918	ENSG00000116473	ENST00000369709	CDS	31.4512	48.8013	8.7563	9	0	0	0	0					RAP1A	RAP1A, member of RAS oncogene family [Source:HGNC Symbol;Acc:9855]	protein_coding
chr1+:112245984-112246048	AGAAUAU no UAUUCU kshv-miR-K12-4-3p(6mer)	0.7469	0.8579	ENSG00000116473	ENST00000369709	CDS	5.24187	0	52.5378	40	9.49896	15.1974	90.5652	93.1965					RAP1A	RAP1A, member of RAS oncogene family [Source:HGNC Symbol;Acc:9855]	protein_coding
chr1+:112308562-112308591	UUUGGUA no ACCAAA hsa-miR-9(6mer-m8)	0.9825	0.5139	ENSG00000064703	ENST00000369702	CDS	0	0	0	0	3.16632	1.51974	23.4799	6.42735					DDX20	DEAD (Asp-Glu-Ala-Asp) box polypeptide 20 [Source:HGNC Symbol;Acc:2743]	protein_coding
chr1+:113000410-113000475	ACAUUCA vertebrate UGAAUGU hsa-miR-181a(7mer-m8) hsa-miR-181b(7mer-m8) hsa-miR-181c(7mer-m8) hsa-miR-181d(7mer-m8) hsa-miR-4262(7mer-m8)	0.5612	0.6399	ENSG00000143079	ENST00000271277	3'UTR	0	0	83.1848	87	1.58316	1.51974	0	0		x			CTTNBP2NL	CTTNBP2 N-terminal like [Source:HGNC Symbol;Acc:25330]	protein_coding
chr1+:113189886-113189895|113192039-113192078	AAGUAGU no ACUACU hsa-miR-199a-3p(6mer-m8) hsa-miR-199b-3p(6mer-m8) hsa-miR-1244(6mer) hsa-miR-3129(6mer-m8) CUACUU hsa-miR-562(6mer)	0.0534	0.9994	ENSG00000116489	ENST00000263168	CDS	15.7256	20.3339	0	1	0	0	0	0					CAPZA1	capping protein (actin filament) muscle Z-line, alpha 1 [Source:HGNC Symbol;Acc:1488]	protein_coding
chr1+:113212881-113212951	GAGAACA no UGUUCU hsa-miR-589*(6mer-m8) GUUCUC hsa-miR-146a(6mer) hsa-miR-146b-5p(6mer) hsa-miR-589(6mer) hsa-miR-3925(6mer-m8)	0.2114	0.7011	ENSG00000116489	ENST00000263168	3'UTR	5.24187	12.2003	0	1	0	0	0	0					CAPZA1	capping protein (actin filament) muscle Z-line, alpha 1 [Source:HGNC Symbol;Acc:1488]	protein_coding
chr1+:113212918-113212970	GCAGUAA no UUACUG hsa-miR-545*(6mer)	0.7921	0.9997	ENSG00000116489	ENST00000263168	3'UTR	15.7256	36.6009	2.18907	7	45.9116	60.7896	0	3.21367					CAPZA1	capping protein (actin filament) muscle Z-line, alpha 1 [Source:HGNC Symbol;Acc:1488]	protein_coding
chr1+:113213159-113213205	AGGUGUU no AACACC kshv-miR-K12-10b(6mer) hsa-miR-609(6mer-m8) ACACCU hsa-miR-3934(6mer-m8)	0.6674	1	ENSG00000116489	ENST00000263168	3'UTR	5.24187	8.13354	4.37815	0	0	0	0	0					CAPZA1	capping protein (actin filament) muscle Z-line, alpha 1 [Source:HGNC Symbol;Acc:1488]	protein_coding
chr1+:113213358-113213437	UGUGCAG weakly CUGCACA hsa-miR-143*(7mer-A1)	0.1499	0.8732	ENSG00000116489	ENST00000263168	3'UTR	41.935	16.2671	6.56722	23	0	0	0	0					CAPZA1	capping protein (actin filament) muscle Z-line, alpha 1 [Source:HGNC Symbol;Acc:1488]	protein_coding
chr1+:113213751-113213822	GGAAGAG no UCUUCC hsa-miR-7(6mer)	0.0579	0.6504	ENSG00000116489	ENST00000263168	3'UTR	26.2094	12.2003	4.37815	12	1.58316	7.59871	6.70853	3.21367					CAPZA1	capping protein (actin filament) muscle Z-line, alpha 1 [Source:HGNC Symbol;Acc:1488]	protein_coding
chr1+:113213904-113213967	GUAAACA vertebrate UGUUUAC hsa-miR-30a(7mer-m8) hsa-miR-30c(7mer-m8) hsa-miR-30d(7mer-m8) hsa-miR-30b(7mer-m8) hsa-miR-30e(7mer-m8)	0.879	0.9967	ENSG00000116489	ENST00000263168	3'UTR	104.837	174.871	137.912	145	227.975	180.849	224.736	202.461					CAPZA1	capping protein (actin filament) muscle Z-line, alpha 1 [Source:HGNC Symbol;Acc:1488]	protein_coding
chr1+:113214127-113214206	AUAGUGU no ACACUA hsa-miR-142-3p(6mer-m8)	0.2811	0.9998	ENSG00000116489	ENST00000263168	3'UTR	5.24187	32.5342	17.5126	1	1.58316	1.51974	3.35426	0					CAPZA1	capping protein (actin filament) muscle Z-line, alpha 1 [Source:HGNC Symbol;Acc:1488]	protein_coding
chr1+:11345907-11345982	UAGAGAA weakly UUCUCUA hsa-miR-3123(7mer-A1) hsa-miR-3925(7mer-A1)	0.7207	0.4718	ENSG00000120942	ENST00000376810	CDS	0	0	2.18907	13	7.9158	0	23.4799	16.0684					UBIAD1	UbiA prenyltransferase domain containing 1 [Source:HGNC Symbol;Acc:30791]	protein_coding
chr1+:113666753-113666786	AAAUGCA no GCAUUU hsa-miR-105(6mer-m8) ebv-miR-BART14(6mer)	0.9793	0.6642	ENSG00000198799	ENST00000361127	3'UTR	5.24187	0	0	0	25.3305	22.7961	0	0					LRIG2	leucine-rich repeats and immunoglobulin-like domains 2 [Source:HGNC Symbol;Acc:20889]	protein_coding
chr1+:113667010-113667071	AGCAGCA vertebrate UGCUGCU hsa-miR-15a(7mer-m8) hsa-miR-16(7mer-m8) hsa-miR-15b(7mer-m8) hsa-miR-195(7mer-m8) hsa-miR-424(7mer-m8) hsa-miR-497(7mer-m8)	0.329	0.9915	ENSG00000198799	ENST00000361127	3'UTR	15.7256	20.3339	4.37815	7	7.9158	4.55922	23.4799	25.7094					LRIG2	leucine-rich repeats and immunoglobulin-like domains 2 [Source:HGNC Symbol;Acc:20889]	protein_coding
chr1+:114092226-114092253|114123163-114123185	UGUAGUG vertebrate CACUACA hsa-miR-142-3p(7mer-A1)	0.9193	0.8491	ENSG00000081026	ENST00000369615	CDS	5.24187	0	102.887	82	94.9896	104.862	36.8969	48.2051					MAGI3	membrane associated guanylate kinase, WW and PDZ domain containing 3 [Source:HGNC Symbol;Acc:29647]	protein_coding
chr1+:114448248-114448310	GAGUGCA no UGCACU hsa-miR-148a(6mer-m8) hsa-miR-130a(6mer) hsa-miR-152(6mer-m8) hsa-miR-301a(6mer) hsa-miR-130b(6mer) hsa-miR-148b(6mer-m8) hsa-miR-519c-3p(6mer-m8) hsa-miR-519b-3p(6mer-m8) hsa-miR-519a(6mer-m8) hsa-miR-454(6mer) hsa-miR-301b(6mer) hsa-miR-4295(6mer) hsa-miR-3666(6mer) GCACUC hsa-miR-1909*(6mer)	0.0047	0.9726	ENSG00000118655	ENST00000369563	CDS	20.9675	8.13354	0	2	0	0	0	0					DCLRE1B	DNA cross-link repair 1B [Source:HGNC Symbol;Acc:17641]	protein_coding
chr1+:114483834-114483883	UGGCAGU vertebrate ACUGCCA hsa-miR-34a(7mer-A1) hsa-miR-34c-5p(7mer-A1) hsa-miR-449a(7mer-A1) hsa-miR-449b(7mer-A1)	0.5779	1	ENSG00000163349	ENST00000369558	CDS	0	0	13.1344	21	14.2484	10.6382	6.70853	12.8547					HIPK1	homeodomain interacting protein kinase 1 [Source:HGNC Symbol;Acc:19006]	protein_coding
chr1+:114500814-114500892	GUGCAAA vertebrate UUUGCAC hsa-miR-19a(7mer-m8) hsa-miR-19b(7mer-m8)	0.3026	0.868	ENSG00000163349	ENST00000369558	CDS	31.4512	52.868	24.0798	11	4.74948	0	0	0					HIPK1	homeodomain interacting protein kinase 1 [Source:HGNC Symbol;Acc:19006]	protein_coding
chr1+:114517646-114517717	GUGCAAA vertebrate UUUGCAC hsa-miR-19a(7mer-m8) hsa-miR-19b(7mer-m8)	0.1417	0.9033	ENSG00000163349	ENST00000369558	3'UTR	41.935	32.5342	8.7563	7	0	1.51974	0	0					HIPK1	homeodomain interacting protein kinase 1 [Source:HGNC Symbol;Acc:19006]	protein_coding
chr1+:114517702-114517770	GGAAGAA no UUCUUC hsa-miR-3185(6mer) UCUUCC hsa-miR-7(6mer)	0.2462	0.3122	ENSG00000163349	ENST00000369558	3'UTR	10.4837	12.2003	0	5	0	0	0	0					HIPK1	homeodomain interacting protein kinase 1 [Source:HGNC Symbol;Acc:19006]	protein_coding
chr1+:114517980-114518034	AAAUGCU no AGCAUUU ebv-miR-BART14(7mer-m8)	0.2258	0.7477	ENSG00000163349	ENST00000369558	3'UTR	0	0	4.37815	2	4.74948	3.03948	0	0					HIPK1	homeodomain interacting protein kinase 1 [Source:HGNC Symbol;Acc:19006]	protein_coding
chr1+:114518065-114518114	AAAGAAU mammals AUUCUUU hsa-miR-186(7mer-m8)	0.8776	0.7447	ENSG00000163349	ENST00000369558	3'UTR	0	0	0	5	60.1601	60.7896	10.0628	3.21367					HIPK1	homeodomain interacting protein kinase 1 [Source:HGNC Symbol;Acc:19006]	protein_coding
chr1+:114519931-114519986	UGUAGUG vertebrate CACUACA hsa-miR-142-3p(7mer-A1)	0.4208	0.7232	ENSG00000163349	ENST00000369558	3'UTR	94.3537	77.2687	37.2143	27	20.5811	42.5528	16.7713	19.282					HIPK1	homeodomain interacting protein kinase 1 [Source:HGNC Symbol;Acc:19006]	protein_coding
chr1+:114520199-114520238	UUUUGUU no AACAAAA ebv-miR-BART19-3p(7mer-A1)	0.369	0.9525	ENSG00000163349	ENST00000369558	3'UTR	0	0	0	0	17.4148	24.3159	0	0					HIPK1	homeodomain interacting protein kinase 1 [Source:HGNC Symbol;Acc:19006]	protein_coding
chr1+:114520241-114520297	UAGUAUU no AAUACU hsa-miR-16-1*(6mer-m8) hsa-miR-496(6mer-m8)	0.4907	0.9822	ENSG00000163349	ENST00000369558	3'UTR	5.24187	20.3339	26.2689	37	99.739	69.9081	16.7713	25.7094					HIPK1	homeodomain interacting protein kinase 1 [Source:HGNC Symbol;Acc:19006]	protein_coding
chr1+:116206697-116206777	UUGCACA no GUGCAA hsa-miR-25(6mer-m8) hsa-miR-32(6mer-m8) hsa-miR-92a(6mer-m8) hsa-miR-363(6mer-m8) hsa-miR-367(6mer-m8) hsa-miR-507(6mer-m8) hsa-miR-92b(6mer-m8) hsa-miR-557(6mer-m8)	0.9883	0.7029	ENSG00000173218	ENST00000355485	CDS	335.48	378.21	507.865	409	704.506	834.338	368.969	282.803					VANGL1	vang-like 1 (van gogh, Drosophila) [Source:HGNC Symbol;Acc:15512]	protein_coding
chr1+:116234115-116234184	AAAGUGC vertebrate GCACUUU hsa-miR-17(7mer-m8) hsa-miR-20a(7mer-m8) hsa-miR-93(7mer-m8) hsa-miR-106a(7mer-m8) hsa-miR-106b(7mer-m8) hsa-miR-20b(7mer-m8) hsa-miR-526b*(7mer-m8) hsa-miR-519d(7mer-m8)	0.7413	0.5115	ENSG00000173218	ENST00000355485	3'UTR	0	8.13354	15.3235	20	1.58316	0	6.70853	12.8547					VANGL1	vang-like 1 (van gogh, Drosophila) [Source:HGNC Symbol;Acc:15512]	protein_coding
chr1+:116234348-116234421	AAAGAUG no	0.8836	0.4883	ENSG00000173218	ENST00000355485	3'UTR	0	0	4.37815	9	0	0	0	0					VANGL1	vang-like 1 (van gogh, Drosophila) [Source:HGNC Symbol;Acc:15512]	protein_coding
chr1+:116238004-116238042	NA	0	0	ENSG00000173218	ENST00000355485	3'UTR	5.24187	4.06677	6.56722	24	4.74948	4.55922	73.7938	115.692					VANGL1	vang-like 1 (van gogh, Drosophila) [Source:HGNC Symbol;Acc:15512]	protein_coding
chr1+:116240730-116240786	UUUACAG no CUGUAAA kshv-miR-K12-1(7mer-A1)	0.7078	0.7073	ENSG00000173218	ENST00000355485	3'UTR	0	0	17.5126	18	0	0	0	0				x	VANGL1	vang-like 1 (van gogh, Drosophila) [Source:HGNC Symbol;Acc:15512]	protein_coding
chr1+:116240750-116240820	UUUACAG no CUGUAAA kshv-miR-K12-1(7mer-A1)	0.9052	0.6773	ENSG00000173218	ENST00000355485	3'UTR	0	0	17.5126	31	68.0759	68.3884	103.982	115.692					VANGL1	vang-like 1 (van gogh, Drosophila) [Source:HGNC Symbol;Acc:15512]	protein_coding
chr1+:116932065-116932112	UCACAGU vertebrate ACUGUGA hsa-miR-27a(7mer-m8) hsa-miR-27b(7mer-m8) hsa-miR-128(7mer-A1) hsa-miR-3681*(7mer-A1)	0.4309	0.7871	ENSG00000163399	ENST00000295598	CDS	5.24187	12.2003	2.18907	0	0	0	0	0					ATP1A1	ATPase, Na+/K+ transporting, alpha 1 polypeptide [Source:HGNC Symbol;Acc:799]	protein_coding
chr1+:116941631-116941689	GGUAGUG no CACUAC hsa-miR-142-3p(6mer) ACUACC hsa-miR-196a(6mer-m8) hsa-miR-196b(6mer-m8) kshv-miR-K12-5*(6mer)	0.761	1	ENSG00000163399	ENST00000295598	CDS	5.24187	32.5342	15.3235	19	7.9158	15.1974	6.70853	3.21367					ATP1A1	ATPase, Na+/K+ transporting, alpha 1 polypeptide [Source:HGNC Symbol;Acc:799]	protein_coding
chr1+:116947217-116947289	GAUGGUU no AACCAUC kshv-miR-K12-6-3p(7mer-m8)	0.0583	0.8507	ENSG00000163399	ENST00000295598	3'UTR	0	0	15.3235	14	0	0	0	0				x	ATP1A1	ATPase, Na+/K+ transporting, alpha 1 polypeptide [Source:HGNC Symbol;Acc:799]	protein_coding
chr1+:117624550-117624569|117626639-117626692	UAGUGUU weakly AACACUA kshv-miR-K12-10a(7mer-A1) hsa-miR-4255(7mer-A1)	0.3865	0.5272	ENSG00000116830	ENST00000369466	CDS	15.7256	4.06677	13.1344	13	0	0	3.35426	6.42735					TTF2	transcription termination factor, RNA polymerase II [Source:HGNC Symbol;Acc:12398]	protein_coding
chr1+:117984861-117984926	CAGCCAA no UGGCUG hsa-miR-3157(6mer-m8)	0.0112	0.6053	ENSG00000198162	ENST00000356554	CDS	0	0	2.18907	13	0	0	0	0					MAN1A2	mannosidase, alpha, class 1A, member 2 [Source:HGNC Symbol;Acc:6822]	protein_coding
chr1+:118003122-118003219	UGUAGUG vertebrate CACUACA hsa-miR-142-3p(7mer-A1)	0.6623	0.5878	ENSG00000198162	ENST00000356554	CDS	52.4187	93.5358	109.454	76	3.16632	6.07896	0	3.21367					MAN1A2	mannosidase, alpha, class 1A, member 2 [Source:HGNC Symbol;Acc:6822]	protein_coding
chr1+:118065582-118065635	GUAAACA vertebrate UGUUUAC hsa-miR-30a(7mer-m8) hsa-miR-30c(7mer-m8) hsa-miR-30d(7mer-m8) hsa-miR-30b(7mer-m8) hsa-miR-30e(7mer-m8)	0.9138	0.9976	ENSG00000198162	ENST00000356554	3'UTR	10.4837	12.2003	13.1344	23	1.58316	0	0	0					MAN1A2	mannosidase, alpha, class 1A, member 2 [Source:HGNC Symbol;Acc:6822]	protein_coding
chr1+:11810669-11810729	ACCAGGC no GCCUGGU kshv-miR-K12-12*(7mer-m8) hsa-miR-1911*(7mer-m8)	0.8489	0.9903	ENSG00000177674	ENST00000314340	3'UTR	0	0	24.0798	9	0	1.51974	0	0					AGTRAP	angiotensin II receptor-associated protein [Source:HGNC Symbol;Acc:13539]	protein_coding
chr1+:118166826-118166890	ACUGUAA no UUACAG hsa-miR-3607-3p(6mer) hsa-miR-3686(6mer-m8) UACAGU kshv-miR-K12-2(6mer) hsa-miR-1183(6mer)	0.0595	0.9476	ENSG00000183508	ENST00000369448	3'UTR	0	0	13.1344	19	0	0	0	0					FAM46C	family with sequence similarity 46, member C [Source:HGNC Symbol;Acc:24712]	protein_coding
chr1+:118166878-118166943	UUAGUGU weakly ACACUA hsa-miR-142-3p(6mer-m8) CACUAA ebv-miR-BART1-5p(6mer-m8)	0.0174	0.8855	ENSG00000183508	ENST00000369448	3'UTR	0	0	8.7563	5	9.49896	24.3159	10.0628	22.4957					FAM46C	family with sequence similarity 46, member C [Source:HGNC Symbol;Acc:24712]	protein_coding
chr1+:118166923-118166981	CAACCCC no	0.1097	0.7882	ENSG00000183508	ENST00000369448	3'UTR	0	0	21.8907	24	0	0	0	0					FAM46C	family with sequence similarity 46, member C [Source:HGNC Symbol;Acc:24712]	protein_coding
chr1+:118166956-118167008	UACUGCA vertebrate UGCAGUA hsa-miR-217(7mer-A1) hsa-miR-509-5p(7mer-A1) hsa-miR-509-3-5p(7mer-A1)	0.1664	0.8773	ENSG00000183508	ENST00000369448	3'UTR	0	0	19.7017	26	0	0	0	0					FAM46C	family with sequence similarity 46, member C [Source:HGNC Symbol;Acc:24712]	protein_coding
chr1+:118167820-118167887	GAAGACA no UGUCUU hsa-miR-641(6mer) hsa-miR-3617(6mer) GUCUUC hsa-miR-7(6mer-m8)	0.0715	0.6945	ENSG00000183508	ENST00000369448	3'UTR	0	0	6.56722	3	14.2484	9.11845	0	0					FAM46C	family with sequence similarity 46, member C [Source:HGNC Symbol;Acc:24712]	protein_coding
chr1+:118167972-118168042	AAAGUGC vertebrate GCACUUU hsa-miR-17(7mer-m8) hsa-miR-20a(7mer-m8) hsa-miR-93(7mer-m8) hsa-miR-106a(7mer-m8) hsa-miR-106b(7mer-m8) hsa-miR-20b(7mer-m8) hsa-miR-526b*(7mer-m8) hsa-miR-519d(7mer-m8)	0.946	0.6343	ENSG00000183508	ENST00000369448	3'UTR	20.9675	12.2003	286.769	207	199.478	218.843	503.14	549.538					FAM46C	family with sequence similarity 46, member C [Source:HGNC Symbol;Acc:24712]	protein_coding
chr1+:118168140-118168192	UGAGUGU weakly ACACUCA hsa-miR-574-5p(7mer-A1) hsa-miR-3659(7mer-A1)	0.0394	0.5674	ENSG00000183508	ENST00000369448	3'UTR	0	0	4.37815	12	0	0	0	19.282					FAM46C	family with sequence similarity 46, member C [Source:HGNC Symbol;Acc:24712]	protein_coding
chr1+:118168197-118168257	AGGAGCA no GCUCCU hsa-miR-28-5p(6mer) ebv-miR-BART2-3p(6mer) hsa-miR-708(6mer) hsa-miR-3139(6mer)	0.8817	0.5566	ENSG00000183508	ENST00000369448	3'UTR	0	0	6.56722	16	0	0	20.1256	3.21367					FAM46C	family with sequence similarity 46, member C [Source:HGNC Symbol;Acc:24712]	protein_coding
chr1+:118168418-118168476	CCAGCUA no AGCUGG kshv-miR-K12-9*(6mer-m8) hsa-miR-4267(6mer)	0.1715	0.7337	ENSG00000183508	ENST00000369448	3'UTR	0	0	13.1344	25	55.4106	57.7502	0	0					FAM46C	family with sequence similarity 46, member C [Source:HGNC Symbol;Acc:24712]	protein_coding
chr1+:118168633-118168692	AAUGACC no	0.7153	0.9726	ENSG00000183508	ENST00000369448	3'UTR	0	4.06677	98.5084	110	14.2484	13.6777	3.35426	3.21367					FAM46C	family with sequence similarity 46, member C [Source:HGNC Symbol;Acc:24712]	protein_coding
chr1+:118170496-118170552	UAAAGUG vertebrate CACUUUA hsa-miR-17(7mer-A1) hsa-miR-20a(7mer-A1) hsa-miR-93(7mer-A1) hsa-miR-106a(7mer-A1) hsa-miR-106b(7mer-A1) hsa-miR-20b(7mer-A1) hsa-miR-526b*(7mer-A1) hsa-miR-519d(7mer-A1) hsa-miR-3609(7mer-A1)	0.9565	0.5988	ENSG00000183508	ENST00000369448	3'UTR	0	0	0	5	96.5727	86.6252	36.8969	32.1367					FAM46C	family with sequence similarity 46, member C [Source:HGNC Symbol;Acc:24712]	protein_coding
chr1+:118170900-118170950	UUGCAUU vertebrate AAUGCAA hsa-miR-33a(7mer-A1) hsa-miR-33b(7mer-A1)	0.9609	1	ENSG00000183508	ENST00000369448	3'UTR	0	0	37.2143	35	500.278	537.988	40.2512	57.8461					FAM46C	family with sequence similarity 46, member C [Source:HGNC Symbol;Acc:24712]	protein_coding
chr1+:118488718-118488778	AAAGUGC vertebrate GCACUUU hsa-miR-17(7mer-m8) hsa-miR-20a(7mer-m8) hsa-miR-93(7mer-m8) hsa-miR-106a(7mer-m8) hsa-miR-106b(7mer-m8) hsa-miR-20b(7mer-m8) hsa-miR-526b*(7mer-m8) hsa-miR-519d(7mer-m8)	0.6742	0.8573	ENSG00000065183	ENST00000349139	CDS	73.3862	52.868	26.2689	37	0	0	0	0					WDR3	WD repeat domain 3 [Source:HGNC Symbol;Acc:12755]	protein_coding
chr1+:120286735-120286825	GCAGUGU no ACACUG hsa-miR-199a-5p(6mer-m8) hsa-miR-199b-5p(6mer-m8) hsa-miR-4302(6mer) CACUGC hsa-miR-34a(6mer-m8) hsa-miR-34c-5p(6mer-m8) hsa-miR-449a(6mer-m8) hsa-miR-449b(6mer-m8)	0.4568	0.4489	ENSG00000092621	ENST00000369407	3'UTR	20.9675	56.9348	4.37815	12	0	0	0	0					PHGDH	phosphoglycerate dehydrogenase [Source:HGNC Symbol;Acc:8923]	protein_coding
chr1+:12049279-12049336	AAAGUGC vertebrate GCACUUU hsa-miR-17(7mer-m8) hsa-miR-20a(7mer-m8) hsa-miR-93(7mer-m8) hsa-miR-106a(7mer-m8) hsa-miR-106b(7mer-m8) hsa-miR-20b(7mer-m8) hsa-miR-526b*(7mer-m8) hsa-miR-519d(7mer-m8)	0.5541	0.9853	ENSG00000116688	ENST00000235329	CDS	47.1769	77.2687	26.2689	22	0	0	0	0					MFN2	mitofusin 2 [Source:HGNC Symbol;Acc:16877]	protein_coding
chr1+:12072322-12072383	CACAAUA no UAUUGU hsa-miR-338-5p(6mer) AUUGUG ebv-miR-BART8*(6mer-m8)	0.8168	1	ENSG00000116688	ENST00000235329	3'UTR	26.2094	28.4674	4.37815	1	0	0	0	0					MFN2	mitofusin 2 [Source:HGNC Symbol;Acc:16877]	protein_coding
chr1+:12073385-12073433	AGCAGCA vertebrate UGCUGCU hsa-miR-15a(7mer-m8) hsa-miR-16(7mer-m8) hsa-miR-15b(7mer-m8) hsa-miR-195(7mer-m8) hsa-miR-424(7mer-m8) hsa-miR-497(7mer-m8)	0.3577	0.999	ENSG00000116688	ENST00000235329	3'UTR	0	0	21.8907	33	11.0821	10.6382	16.7713	41.7777		x			MFN2	mitofusin 2 [Source:HGNC Symbol;Acc:16877]	protein_coding
chr1+:12204174-12204205	AAGUGCA weakly UGCACUU hsa-miR-519c-3p(7mer-m8) hsa-miR-519b-3p(7mer-m8) hsa-miR-519a(7mer-m8)	0.9815	1	ENSG00000120949	ENST00000263932	3'UTR	5.24187	0	4.37815	6	0	0	33.5426	57.8461					TNFRSF8	tumor necrosis factor receptor superfamily, member 8 [Source:HGNC Symbol;Acc:11923]	protein_coding
chr1+:14107714-14107769	UUCAGCA weakly UGCUGAA hsa-miR-4291(7mer-A1)	0.6102	0.9996	ENSG00000116731	ENST00000235372	CDS	0	4.06677	6.56722	2	4.74948	4.55922	36.8969	51.4188					PRDM2	PR domain containing 2, with ZNF domain [Source:HGNC Symbol;Acc:9347]	protein_coding
chr1+:14108213-14108288	GUAGUGA no UCACUA hsa-miR-921(6mer) hsa-miR-3606(6mer) CACUAC hsa-miR-142-3p(6mer)	0.8837	0.9298	ENSG00000116731	ENST00000235372	CDS	172.982	239.94	155.424	115	867.571	892.088	825.149	822.7					PRDM2	PR domain containing 2, with ZNF domain [Source:HGNC Symbol;Acc:9347]	protein_coding
chr1+:14108248-14108306	UGUGCAG weakly CUGCACA hsa-miR-143*(7mer-A1)	0.3294	0.8052	ENSG00000116731	ENST00000235372	CDS	10.4837	8.13354	4.37815	1	0	0	0	0					PRDM2	PR domain containing 2, with ZNF domain [Source:HGNC Symbol;Acc:9347]	protein_coding
chr1+:14113054-14113103	GUAGUGC no CACUAC hsa-miR-142-3p(6mer)	0.9002	1	ENSG00000116731	ENST00000311066	3'UTR	0	16.2671	6.56722	8	14.2484	12.1579	50.314	44.9914					PRDM2	PR domain containing 2, with ZNF domain [Source:HGNC Symbol;Acc:9347]	protein_coding
chr1+:14114025-14114084	AUAGUGG no	0.3812	0.9269	ENSG00000116731	ENST00000311066	3'UTR	0	0	2.18907	0	6.33264	7.59871	10.0628	6.42735					PRDM2	PR domain containing 2, with ZNF domain [Source:HGNC Symbol;Acc:9347]	protein_coding
chr1+:145103987-145104017|145109523-145109547	GUAGUGA no UCACUA hsa-miR-921(6mer) hsa-miR-3606(6mer) CACUAC hsa-miR-142-3p(6mer)	0.2262	0.5349	ENSG00000223380	ENST00000453618	CDS	26.2094	40.6677	26.2689	40	4.74948	0	0	3.21367					SEC22B	SEC22 vesicle trafficking protein homolog B (S. cerevisiae) (gene/pseudogene) [Source:HGNC Symbol;Acc:10700]	polymorphic_pseudogene
chr1+:145116477-145116523	UGUGCAA vertebrate UUGCACA hsa-miR-19a(7mer-A1) hsa-miR-19b(7mer-A1)	0.6323	0.902	ENSG00000223380	ENST00000453618	3'UTR	10.4837	12.2003	2.18907	3	11.0821	7.59871	0	3.21367					SEC22B	SEC22 vesicle trafficking protein homolog B (S. cerevisiae) (gene/pseudogene) [Source:HGNC Symbol;Acc:10700]	polymorphic_pseudogene
chr1+:145283059-145283097	UAAAGUG vertebrate CACUUUA hsa-miR-17(7mer-A1) hsa-miR-20a(7mer-A1) hsa-miR-93(7mer-A1) hsa-miR-106a(7mer-A1) hsa-miR-106b(7mer-A1) hsa-miR-20b(7mer-A1) hsa-miR-526b*(7mer-A1) hsa-miR-519d(7mer-A1) hsa-miR-3609(7mer-A1)	0.9633	0.9152	ENSG00000213240	ENST00000454606	3'UTR	0	0	2.18907	2	42.7453	37.9935	0	0					NOTCH2NL	notch 2 N-terminal like [Source:HGNC Symbol;Acc:31862]	protein_coding
chr1+:145441301-145441350	CAGAGGC no CCUCUG hsa-miR-4257(6mer)	0.4571	0.8606	ENSG00000117289	ENST00000369317	3'UTR	15.7256	4.06677	0	1	0	0	0	0					TXNIP	thioredoxin interacting protein [Source:HGNC Symbol;Acc:16952]	protein_coding
chr1+:145441354-145441406	AGGCCCA no	0.0551	0.6456	ENSG00000117289	ENST00000369317	3'UTR	5.24187	12.2003	4.37815	2	0	0	0	0					TXNIP	thioredoxin interacting protein [Source:HGNC Symbol;Acc:16952]	protein_coding
chr1+:145441678-145441759	AAGUGCA weakly UGCACUU hsa-miR-519c-3p(7mer-m8) hsa-miR-519b-3p(7mer-m8) hsa-miR-519a(7mer-m8)	0.4518	0.9818	ENSG00000117289	ENST00000369317	3'UTR	89.1118	166.738	30.647	20	7.9158	4.55922	0	0					TXNIP	thioredoxin interacting protein [Source:HGNC Symbol;Acc:16952]	protein_coding
chr1+:145441875-145441963	AGUGCAA vertebrate UUGCACU hsa-miR-130a(7mer-m8) hsa-miR-301a(7mer-m8) hsa-miR-130b(7mer-m8) hsa-miR-454(7mer-m8) hsa-miR-301b(7mer-m8) hsa-miR-4295(7mer-m8) hsa-miR-3666(7mer-m8)	0.5127	0.7044	ENSG00000117289	ENST00000369317	3'UTR	47.1769	77.2687	19.7017	28	0	0	0	0					TXNIP	thioredoxin interacting protein [Source:HGNC Symbol;Acc:16952]	protein_coding
chr1+:145441921-145441985	CUCCCAU no AUGGGAG hsa-miR-2116*(7mer-m8)	0.412	0.8722	ENSG00000117289	ENST00000369317	3'UTR	26.2094	20.3339	10.9454	4	0	0	0	0					TXNIP	thioredoxin interacting protein [Source:HGNC Symbol;Acc:16952]	protein_coding
chr1+:145441955-145441993	CCAAGGA no	0.3792	0.9192	ENSG00000117289	ENST00000369317	3'UTR	10.4837	16.2671	2.18907	5	0	0	0	0					TXNIP	thioredoxin interacting protein [Source:HGNC Symbol;Acc:16952]	protein_coding
chr1+:145441977-145442065	AAAGUGC vertebrate GCACUUU hsa-miR-17(7mer-m8) hsa-miR-20a(7mer-m8) hsa-miR-93(7mer-m8) hsa-miR-106a(7mer-m8) hsa-miR-106b(7mer-m8) hsa-miR-20b(7mer-m8) hsa-miR-526b*(7mer-m8) hsa-miR-519d(7mer-m8)	0.1785	0.6889	ENSG00000117289	ENST00000369317	3'UTR	288.303	292.808	50.3487	49	4.74948	3.03948	0	0					TXNIP	thioredoxin interacting protein [Source:HGNC Symbol;Acc:16952]	protein_coding
chr1+:145442024-145442093	GAUGGCA no UGCCAU hsa-miR-183(6mer)	0.7653	0.6587	ENSG00000117289	ENST00000369317	3'UTR	15.7256	0	52.5378	39	52.2443	27.3553	43.6054	80.3418					TXNIP	thioredoxin interacting protein [Source:HGNC Symbol;Acc:16952]	protein_coding
chr1+:145442053-145442102	AGCUUAC no UAAGCU hsa-miR-21(6mer) hsa-miR-27b*(6mer-m8) hsa-miR-590-5p(6mer)	0.476	0.9764	ENSG00000117289	ENST00000369317	3'UTR	41.935	36.6009	6.56722	9	11.0821	9.11845	3.35426	0					TXNIP	thioredoxin interacting protein [Source:HGNC Symbol;Acc:16952]	protein_coding
chr1+:145442064-145442104	CACAGUA no UACUGU hsa-miR-101(6mer) hsa-miR-144(6mer) ACUGUG hsa-miR-27a(6mer-m8) hsa-miR-27b(6mer-m8) hsa-miR-128(6mer) hsa-miR-3681*(6mer)	0.4928	0.6238	ENSG00000117289	ENST00000369317	3'UTR	15.7256	32.5342	0	5	0	0	0	0					TXNIP	thioredoxin interacting protein [Source:HGNC Symbol;Acc:16952]	protein_coding
chr1+:145442102-145442147	AAAGUAG no CUACUU hsa-miR-562(6mer) UACUUU hsa-miR-559(6mer) hsa-miR-548b-5p(6mer) hsa-miR-548a-5p(6mer) hsa-miR-548c-5p(6mer) hsa-miR-548d-5p(6mer) hsa-miR-548j(6mer) hsa-miR-548k(6mer) hsa-miR-548l(6mer) hsa-miR-548n(6mer-m8) hsa-miR-548h(6mer) hsa-miR-548i(6mer) hsa-miR-548w(6mer) hsa-miR-548y(6mer)	0.2151	0.6661	ENSG00000117289	ENST00000369317	3'UTR	0	8.13354	2.18907	6	33.2463	22.7961	0	3.21367					TXNIP	thioredoxin interacting protein [Source:HGNC Symbol;Acc:16952]	protein_coding
chr1+:145442135-145442187	AUUUAAG no	0.5428	0.9818	ENSG00000117289	ENST00000369317	3'UTR	20.9675	28.4674	2.18907	5	83.9074	83.5858	60.3768	38.5641					TXNIP	thioredoxin interacting protein [Source:HGNC Symbol;Acc:16952]	protein_coding
chr1+:145442170-145442233	AGCAGCA vertebrate UGCUGCU hsa-miR-15a(7mer-m8) hsa-miR-16(7mer-m8) hsa-miR-15b(7mer-m8) hsa-miR-195(7mer-m8) hsa-miR-424(7mer-m8) hsa-miR-497(7mer-m8)	0.0423	0.9938	ENSG00000117289	ENST00000369317	3'UTR	26.2094	20.3339	8.7563	6	0	0	0	0					TXNIP	thioredoxin interacting protein [Source:HGNC Symbol;Acc:16952]	protein_coding
chr1+:145442198-145442251	AAGAGUU no AACUCU hsa-let-7c*(6mer)	0.4252	1	ENSG00000117289	ENST00000369317	3'UTR	115.321	85.4022	32.8361	43	28.4969	31.9146	13.4171	6.42735					TXNIP	thioredoxin interacting protein [Source:HGNC Symbol;Acc:16952]	protein_coding
chr1+:145442265-145442297	UGGCAGU vertebrate ACUGCCA hsa-miR-34a(7mer-A1) hsa-miR-34c-5p(7mer-A1) hsa-miR-449a(7mer-A1) hsa-miR-449b(7mer-A1)	0.9316	1	ENSG00000117289	ENST00000369317	3'UTR	36.6931	61.0016	8.7563	4	71.2422	71.4278	10.0628	19.282					TXNIP	thioredoxin interacting protein [Source:HGNC Symbol;Acc:16952]	protein_coding
chr1+:145442317-145442388	UGCAGUG no CACUGC hsa-miR-34a(6mer-m8) hsa-miR-34c-5p(6mer-m8) hsa-miR-449a(6mer-m8) hsa-miR-449b(6mer-m8) ACUGCA hsa-miR-17*(6mer-m8) hsa-miR-143*(6mer-m8)	0.6869	0.6804	ENSG00000117289	ENST00000369317	3'UTR	41.935	69.1351	8.7563	4	0	0	0	0					TXNIP	thioredoxin interacting protein [Source:HGNC Symbol;Acc:16952]	protein_coding
chr1+:145442344-145442408	ACUGACC no GGUCAG hsa-miR-4256(6mer-m8) GUCAGU hsa-miR-888*(6mer)	0.3252	0.567	ENSG00000117289	ENST00000369317	3'UTR	52.4187	48.8013	4.37815	26	6.33264	6.07896	3.35426	6.42735					TXNIP	thioredoxin interacting protein [Source:HGNC Symbol;Acc:16952]	protein_coding
chr1+:145442374-145442445	AAAGUGC vertebrate GCACUUU hsa-miR-17(7mer-m8) hsa-miR-20a(7mer-m8) hsa-miR-93(7mer-m8) hsa-miR-106a(7mer-m8) hsa-miR-106b(7mer-m8) hsa-miR-20b(7mer-m8) hsa-miR-526b*(7mer-m8) hsa-miR-519d(7mer-m8)	0.7811	0.9844	ENSG00000117289	ENST00000369317	3'UTR	613.299	536.814	87.563	104	0	0	0	0					TXNIP	thioredoxin interacting protein [Source:HGNC Symbol;Acc:16952]	protein_coding
chr1+:145442411-145442443	GACACAG no UGUGUC hsa-miR-642b(6mer)	0.3522	0.4952	ENSG00000117289	ENST00000369317	3'UTR	20.9675	16.2671	0	1	0	0	0	0					TXNIP	thioredoxin interacting protein [Source:HGNC Symbol;Acc:16952]	protein_coding
chr1+:145442418-145442490	AGAAAAG no	0.5912	0.999	ENSG00000117289	ENST00000369317	3'UTR	57.6606	40.6677	10.9454	15	0	0	0	0					TXNIP	thioredoxin interacting protein [Source:HGNC Symbol;Acc:16952]	protein_coding
chr1+:145442473-145442531	CCAACCA no	0.3686	0.9494	ENSG00000117289	ENST00000369317	3'UTR	36.6931	28.4674	8.7563	14	0	3.03948	0	0					TXNIP	thioredoxin interacting protein [Source:HGNC Symbol;Acc:16952]	protein_coding
chr1+:145442521-145442580	UACAAAA no UUUGUA hsa-miR-524-5p(6mer) hsa-miR-520d-5p(6mer) hsa-miR-1283(6mer-m8) ebv-miR-BART22(6mer)	0.8017	1	ENSG00000117289	ENST00000369317	3'UTR	0	0	0	1	101.322	103.342	0	0					TXNIP	thioredoxin interacting protein [Source:HGNC Symbol;Acc:16952]	protein_coding
chr1+:145475047-145475075	AAUCCCA no UGGGAU kshv-miR-K12-7(6mer-m8) GGGAUU hsa-miR-605(6mer-m8)	0.7893	0.993	ENSG00000181039	ENST00000323397	3'UTR	5.24187	0	43.7815	42	0	1.51974	20.1256	12.8547					ANKRD34A	ankyrin repeat domain 34A [Source:HGNC Symbol;Acc:27639]	protein_coding
chr1+:145475232-145475289	GUGCAAA vertebrate UUUGCAC hsa-miR-19a(7mer-m8) hsa-miR-19b(7mer-m8)	0.8642	0.9405	ENSG00000181039	ENST00000323397	3'UTR	15.7256	0	72.2395	87	1.58316	1.51974	3.35426	9.64102					ANKRD34A	ankyrin repeat domain 34A [Source:HGNC Symbol;Acc:27639]	protein_coding
chr1+:145498972-145499014	UAAAGUG vertebrate CACUUUA hsa-miR-17(7mer-A1) hsa-miR-20a(7mer-A1) hsa-miR-93(7mer-A1) hsa-miR-106a(7mer-A1) hsa-miR-106b(7mer-A1) hsa-miR-20b(7mer-A1) hsa-miR-526b*(7mer-A1) hsa-miR-519d(7mer-A1) hsa-miR-3609(7mer-A1)	0.9796	1	ENSG00000152022	ENST00000369308	3'UTR	0	8.13354	6.56722	2	77.5748	63.8291	6.70853	9.64102					LIX1L	Lix1 homolog (mouse)-like [Source:HGNC Symbol;Acc:28715]	protein_coding
chr1+:145499072-145499143	UACCUGA no UCAGGUA ebv-miR-BART4(7mer-A1)	0.4699	0.9945	ENSG00000152022	ENST00000369308	3'UTR	0	0	0	0	49.0779	42.5528	0	0					LIX1L	Lix1 homolog (mouse)-like [Source:HGNC Symbol;Acc:28715]	protein_coding
chr1+:145499411-145499455	GUAUACA no UGUAUA hsa-let-7a*(6mer) hsa-let-7b*(6mer) hsa-let-7f-1*(6mer) hsa-let-7f-2*(6mer) hsa-miR-1284(6mer-m8)	0.9063	1	ENSG00000152022	ENST00000369308	3'UTR	0	0	6.56722	8	14.2484	15.1974	110.691	109.265					LIX1L	Lix1 homolog (mouse)-like [Source:HGNC Symbol;Acc:28715]	protein_coding
chr1+:145499683-145499732	AGCAGCA vertebrate UGCUGCU hsa-miR-15a(7mer-m8) hsa-miR-16(7mer-m8) hsa-miR-15b(7mer-m8) hsa-miR-195(7mer-m8) hsa-miR-424(7mer-m8) hsa-miR-497(7mer-m8)	0.7955	0.9494	ENSG00000152022	ENST00000369308	3'UTR	0	0	13.1344	3	0	0	0	0					LIX1L	Lix1 homolog (mouse)-like [Source:HGNC Symbol;Acc:28715]	protein_coding
chr1+:145509278-145509328	ACGGUAA no	0.8487	0.9086	ENSG00000131795	ENST00000330165	3'UTR	0	0	0	0	55.4106	57.7502	0	0					RBM8A	RNA binding motif protein 8A [Source:HGNC Symbol;Acc:9905]	protein_coding
chr1+:145511168-145511222	UAUAAAG mammals CUUUAUA hsa-miR-142-5p(7mer-A1) hsa-miR-340(7mer-m8)	0.769	0.6542	ENSG00000131795	ENST00000330165	3'UTR	10.4837	12.2003	2.18907	7	66.4927	75.9871	20.1256	51.4188					RBM8A	RNA binding motif protein 8A [Source:HGNC Symbol;Acc:9905]	protein_coding
chr1+:147096327-147096379	UAAUGCU vertebrate AGCAUUA hsa-miR-155(7mer-m8) kshv-miR-K12-11(7mer-m8)	0.0056	0.9899	ENSG00000116128	ENST00000234739	CDS	0	0	19.7017	6	0	0	0	0					BCL9	B-cell CLL/lymphoma 9 [Source:HGNC Symbol;Acc:1008]	protein_coding
chr1+:147751502-147751560	GUAGUGA no UCACUA hsa-miR-921(6mer) hsa-miR-3606(6mer) CACUAC hsa-miR-142-3p(6mer)	0.5123	0.7048	ENSG00000251240	ENST00000514564	lincRNA	20.9675	73.2019	0	0	1.58316	3.03948	0	0					AL592207.2		lincRNA
chr1+:148241505-148241547	AUGGAUA no UAUCCA hsa-miR-1261(6mer) AUCCAU hsa-miR-490-5p(6mer-m8) hsa-miR-1246(6mer) hsa-miR-3134(6mer-m8)	0.1267	0.9997	ENSG00000207501	ENST00000384770	snRNA	131.047	101.669	80.9958	90	26.9137	25.8356	0	0					U1	U1 spliceosomal RNA [Source:RFAM;Acc:RF00003]	snRNA
chr1+:150044257-150044293|150048310-150048328	UAGUGUA weakly UACACUA hsa-miR-4280(7mer-A1)	0.7464	0.5315	ENSG00000136631	ENST00000369130	CDS	0	0	2.18907	3	31.6632	19.7566	13.4171	12.8547					VPS45	vacuolar protein sorting 45 homolog (S. cerevisiae) [Source:HGNC Symbol;Acc:14579]	protein_coding
chr1+:150266706-150266767	AUGAUGG no CAUCAU hsa-miR-1272(6mer) hsa-miR-1322(6mer)	0.2771	0.5722	ENSG00000187145	ENST00000369084	5'UTR	0	0	8.7563	10	0	0	0	12.8547					MRPS21	mitochondrial ribosomal protein S21 [Source:HGNC Symbol;Acc:14046]	protein_coding
chr1+:150280702-150280776	UAUUGCA vertebrate UGCAAUA hsa-miR-25(7mer-A1) hsa-miR-32(7mer-A1) hsa-miR-92a(7mer-A1) hsa-miR-363(7mer-A1) hsa-miR-367(7mer-A1) hsa-miR-92b(7mer-A1)	0.5464	0.8073	ENSG00000187145	ENST00000369084	3'UTR	0	8.13354	8.7563	5	6.33264	15.1974	3.35426	3.21367					MRPS21	mitochondrial ribosomal protein S21 [Source:HGNC Symbol;Acc:14046]	protein_coding
chr1+:150305455-150305534	UAGUGUU weakly AACACUA kshv-miR-K12-10a(7mer-A1) hsa-miR-4255(7mer-A1)	0.0721	0.7761	ENSG00000117360	ENST00000467329	protein_coding	26.2094	28.4674	8.7563	8	0	0	0	0					PRPF3	PRP3 pre-mRNA processing factor 3 homolog (S. cerevisiae) [Source:HGNC Symbol;Acc:17348]	protein_coding
chr1+:150325380-150325467	GUAGUGU vertebrate ACACUAC hsa-miR-142-3p(7mer-m8)	0.0064	0.5247	ENSG00000117360	ENST00000467329	protein_coding	41.935	12.2003	4.37815	1	0	0	0	0	x				PRPF3	PRP3 pre-mRNA processing factor 3 homolog (S. cerevisiae) [Source:HGNC Symbol;Acc:17348]	protein_coding
chr1+:150325615-150325658	AUGCACA no GUGCAU hsa-miR-501-3p(6mer) hsa-miR-502-3p(6mer)	0.7964	0.9998	ENSG00000117360	ENST00000467329	protein_coding	20.9675	36.6009	6.56722	7	3.16632	6.07896	0	3.21367					PRPF3	PRP3 pre-mRNA processing factor 3 homolog (S. cerevisiae) [Source:HGNC Symbol;Acc:17348]	protein_coding
chr1+:150437131-150437197	AAAGUGC vertebrate GCACUUU hsa-miR-17(7mer-m8) hsa-miR-20a(7mer-m8) hsa-miR-93(7mer-m8) hsa-miR-106a(7mer-m8) hsa-miR-106b(7mer-m8) hsa-miR-20b(7mer-m8) hsa-miR-526b*(7mer-m8) hsa-miR-519d(7mer-m8)	0.8365	0.7903	ENSG00000163125	ENST00000401000	CDS	68.1443	52.868	52.5378	56	3.16632	4.55922	6.70853	0					RPRD2	regulation of nuclear pre-mRNA domain containing 2 [Source:HGNC Symbol;Acc:29039]	protein_coding
chr1+:150443175-150443244	UGAUGAG no CUCAUC hsa-miR-1255a(6mer-m8) hsa-miR-1255b(6mer-m8) UCAUCA hsa-miR-1272(6mer-m8)	0.3658	0.612	ENSG00000163125	ENST00000401000	CDS	0	4.06677	0	0	0	4.55922	13.4171	12.8547					RPRD2	regulation of nuclear pre-mRNA domain containing 2 [Source:HGNC Symbol;Acc:29039]	protein_coding
chr1+:150446179-150446232	AUUGCAC vertebrate GUGCAAU hsa-miR-25(7mer-m8) hsa-miR-32(7mer-m8) hsa-miR-92a(7mer-m8) hsa-miR-363(7mer-m8) hsa-miR-367(7mer-m8) hsa-miR-92b(7mer-m8)	0.4346	0.7928	ENSG00000163125	ENST00000401000	3'UTR	68.1443	36.6009	19.7017	23	7.9158	6.07896	0	0					RPRD2	regulation of nuclear pre-mRNA domain containing 2 [Source:HGNC Symbol;Acc:29039]	protein_coding
chr1+:150446414-150446455	NA	0	0	ENSG00000163125	ENST00000401000	3'UTR	0	0	0	0	0	3.03948	10.0628	25.7094					RPRD2	regulation of nuclear pre-mRNA domain containing 2 [Source:HGNC Symbol;Acc:29039]	protein_coding
chr1+:150446455-150446489	ACUGUAG weakly CUACAGU kshv-miR-K12-2(7mer-m8) hsa-miR-1183(7mer-m8)	0.1785	0.9332	ENSG00000163125	ENST00000401000	3'UTR	0	0	43.7815	24	52.2443	50.1515	33.5426	48.2051					RPRD2	regulation of nuclear pre-mRNA domain containing 2 [Source:HGNC Symbol;Acc:29039]	protein_coding
chr1+:150447814-150447861	AGCAGCA vertebrate UGCUGCU hsa-miR-15a(7mer-m8) hsa-miR-16(7mer-m8) hsa-miR-15b(7mer-m8) hsa-miR-195(7mer-m8) hsa-miR-424(7mer-m8) hsa-miR-497(7mer-m8)	0.8403	1	ENSG00000163125	ENST00000401000	3'UTR	10.4837	20.3339	80.9958	49	41.1621	68.3884	16.7713	32.1367					RPRD2	regulation of nuclear pre-mRNA domain containing 2 [Source:HGNC Symbol;Acc:29039]	protein_coding
chr1+:150447854-150447908	UAAAUGG weakly CCAUUUA hsa-miR-224*(7mer-A1) hsa-miR-522(7mer-A1)	0.8366	0.9649	ENSG00000163125	ENST00000401000	3'UTR	0	0	2.18907	12	31.6632	7.59871	3.35426	0					RPRD2	regulation of nuclear pre-mRNA domain containing 2 [Source:HGNC Symbol;Acc:29039]	protein_coding
chr1+:150999746-150999800	AUUGCAC vertebrate GUGCAAU hsa-miR-25(7mer-m8) hsa-miR-32(7mer-m8) hsa-miR-92a(7mer-m8) hsa-miR-363(7mer-m8) hsa-miR-367(7mer-m8) hsa-miR-92b(7mer-m8)	0.1178	0.9199	ENSG00000143363	ENST00000271620	CDS	10.4837	12.2003	10.9454	4	3.16632	0	0	0					PRUNE	prune homolog (Drosophila) [Source:HGNC Symbol;Acc:13420]	protein_coding
chr1+:151001325-151001384	AGUGUUG no CAACACU kshv-miR-K12-10a(7mer-m8)	0.9641	0.8073	ENSG00000143363	ENST00000271620	CDS	10.4837	0	32.8361	36	25.3305	33.4343	191.193	163.897					PRUNE	prune homolog (Drosophila) [Source:HGNC Symbol;Acc:13420]	protein_coding
chr1+:151204730-151204788	UGUAGUG vertebrate CACUACA hsa-miR-142-3p(7mer-A1)	0.0094	0.8793	ENSG00000143398	ENST00000349792	CDS	20.9675	28.4674	17.5126	24	0	0	0	0					PIP5K1A	phosphatidylinositol-4-phosphate 5-kinase, type I, alpha [Source:HGNC Symbol;Acc:8994]	protein_coding
chr1+:151220772-151220820	UUACAGG weakly CCUGUAA kshv-miR-K12-1(7mer-m8)	0.6815	0.7587	ENSG00000143398	ENST00000349792	3'UTR	0	0	15.3235	26	3.16632	0	13.4171	0					PIP5K1A	phosphatidylinositol-4-phosphate 5-kinase, type I, alpha [Source:HGNC Symbol;Acc:8994]	protein_coding
chr1+:151372123-151372198	AAAGUGC vertebrate GCACUUU hsa-miR-17(7mer-m8) hsa-miR-20a(7mer-m8) hsa-miR-93(7mer-m8) hsa-miR-106a(7mer-m8) hsa-miR-106b(7mer-m8) hsa-miR-20b(7mer-m8) hsa-miR-526b*(7mer-m8) hsa-miR-519d(7mer-m8)	0.6806	0.6355	ENSG00000159377	ENST00000290541	CDS	152.014	134.203	197.017	169	4.74948	9.11845	0	0					PSMB4	proteasome (prosome, macropain) subunit, beta type, 4 [Source:HGNC Symbol;Acc:9541]	protein_coding
chr1+:151372543-151372606	AUAAUGC no GCAUUA hsa-miR-155(6mer) kshv-miR-K12-11(6mer)	0.0454	1	ENSG00000159377	ENST00000290541	CDS	0	0	4.37815	1	3.16632	0	16.7713	3.21367					PSMB4	proteasome (prosome, macropain) subunit, beta type, 4 [Source:HGNC Symbol;Acc:9541]	protein_coding
chr1+:151373261-151373321|151373714-151373744	UGCACCA weakly UGGUGCA ebv-miR-BART3(7mer-A1) hsa-miR-767-5p(7mer-A1)	0.1038	0.7901	ENSG00000159377	ENST00000290541	CDS	10.4837	12.2003	8.7563	15	7.9158	3.03948	0	0					PSMB4	proteasome (prosome, macropain) subunit, beta type, 4 [Source:HGNC Symbol;Acc:9541]	protein_coding
chr1+:151374360-151374401	UACAAAA no UUUGUA hsa-miR-524-5p(6mer) hsa-miR-520d-5p(6mer) hsa-miR-1283(6mer-m8) ebv-miR-BART22(6mer)	0.3729	0.9997	ENSG00000159377	ENST00000290541	3'UTR	0	0	0	0	140.901	127.658	0	0					PSMB4	proteasome (prosome, macropain) subunit, beta type, 4 [Source:HGNC Symbol;Acc:9541]	protein_coding
chr1+:151664981-151665043	AAAGUGC vertebrate GCACUUU hsa-miR-17(7mer-m8) hsa-miR-20a(7mer-m8) hsa-miR-93(7mer-m8) hsa-miR-106a(7mer-m8) hsa-miR-106b(7mer-m8) hsa-miR-20b(7mer-m8) hsa-miR-526b*(7mer-m8) hsa-miR-519d(7mer-m8)	0.848	0.8183	ENSG00000143376	ENST00000368843	CDS	36.6931	40.6677	24.0798	22	1.58316	0	0	0					SNX27	sorting nexin family member 27 [Source:HGNC Symbol;Acc:20073]	protein_coding
chr1+:151667223-151667270	GUGCAAA vertebrate UUUGCAC hsa-miR-19a(7mer-m8) hsa-miR-19b(7mer-m8)	0.7957	0.7515	ENSG00000143376	ENST00000368843	3'UTR	5.24187	8.13354	19.7017	22	3.16632	4.55922	0	0					SNX27	sorting nexin family member 27 [Source:HGNC Symbol;Acc:20073]	protein_coding
chr1+:151667274-151667306	UGCAGCU weakly AGCUGCA hsa-miR-1301(7mer-m8)	0.9754	1	ENSG00000143376	ENST00000368843	3'UTR	0	0	0	0	85.4906	83.5858	36.8969	22.4957					SNX27	sorting nexin family member 27 [Source:HGNC Symbol;Acc:20073]	protein_coding
chr1+:153634205-153634263	AAAAGUG weakly CACUUUU hsa-miR-548t(7mer-m8)	0.2479	0.6001	ENSG00000143553	ENST00000368685	3'UTR	5.24187	4.06677	8.7563	11	0	0	0	0					SNAPIN	SNAP-associated protein [Source:HGNC Symbol;Acc:17145]	protein_coding
chr1+:153730111-153730159	UAGCGAA no	0.1247	0.9806	ENSG00000143624	ENST00000456435	CDS	10.4837	0	30.647	14	1.58316	3.03948	0	0					INTS3	integrator complex subunit 3 [Source:HGNC Symbol;Acc:26153]	protein_coding
chr1+:153946732-153946760	ACAUAAC no GUUAUGU ebv-miR-BART10(7mer-m8)	0.9903	0.8722	ENSG00000143578	ENST00000368607	3'UTR	0	0	0	0	44.3285	50.1515	0	0					CREB3L4	cAMP responsive element binding protein 3-like 4 [Source:HGNC Symbol;Acc:18854]	protein_coding
chr1+:154227757-154227802|154228158-154228171	GGUAGUA no ACUACC hsa-miR-196a(6mer-m8) hsa-miR-196b(6mer-m8) kshv-miR-K12-5*(6mer)	0.9684	0.6194	ENSG00000143569	ENST00000433006	3'UTR	0	0	4.37815	1	20.5811	36.4738	0	0					UBAP2L	ubiquitin associated protein 2-like [Source:HGNC Symbol;Acc:29877]	protein_coding
chr1+:154228171-154228231|154229538-154229562	GUGCAAA vertebrate UUUGCAC hsa-miR-19a(7mer-m8) hsa-miR-19b(7mer-m8)	0.9459	0.93	ENSG00000143569	ENST00000433006	3'UTR	10.4837	85.4022	24.0798	36	288.135	284.192	26.8341	16.0684					UBAP2L	ubiquitin associated protein 2-like [Source:HGNC Symbol;Acc:29877]	protein_coding
chr1+:154229557-154229614	AAAGUGC vertebrate GCACUUU hsa-miR-17(7mer-m8) hsa-miR-20a(7mer-m8) hsa-miR-93(7mer-m8) hsa-miR-106a(7mer-m8) hsa-miR-106b(7mer-m8) hsa-miR-20b(7mer-m8) hsa-miR-526b*(7mer-m8) hsa-miR-519d(7mer-m8)	0.827	0.892	ENSG00000143569	ENST00000433006	3'UTR	15.7256	4.06677	6.56722	6	9.49896	9.11845	3.35426	9.64102					UBAP2L	ubiquitin associated protein 2-like [Source:HGNC Symbol;Acc:29877]	protein_coding
chr1+:154246286-154246342	AUUGAGU no	0.1452	1	ENSG00000143575	ENST00000328703	CDS	10.4837	20.3339	4.37815	9	52.2443	59.2699	0	0					HAX1	HCLS1 associated protein X-1 [Source:HGNC Symbol;Acc:16915]	protein_coding
chr1+:154440577-154440611	AGCUUAU vertebrate AUAAGCU hsa-miR-21(7mer-m8) hsa-miR-590-5p(7mer-m8)	0.8754	0.9353	ENSG00000160712	ENST00000368485	3'UTR	0	0	2.18907	12	0	0	0	0					IL6R	interleukin 6 receptor [Source:HGNC Symbol;Acc:6019]	protein_coding
chr1+:154441799-154441856	ACUGACC no GGUCAG hsa-miR-4256(6mer-m8) GUCAGU hsa-miR-888*(6mer)	0.5428	0.9509	ENSG00000160712	ENST00000368485	3'UTR	0	0	4.37815	9	0	0	0	0					IL6R	interleukin 6 receptor [Source:HGNC Symbol;Acc:6019]	protein_coding
chr1+:154960933-154960988	GAGGUAG vertebrate CUACCUC hsa-let-7a(7mer-m8) hsa-let-7b(7mer-m8) hsa-let-7c(7mer-m8) hsa-let-7d(7mer-m8) hsa-let-7e(7mer-m8) hsa-let-7f(7mer-m8) hsa-miR-98(7mer-m8) hsa-let-7g(7mer-m8) hsa-let-7i(7mer-m8)	0.1312	0.8272	ENSG00000160688	ENST00000368433	CDS	26.2094	12.2003	2.18907	4	7.9158	1.51974	0	0					FLAD1	FAD1 flavin adenine dinucleotide synthetase homolog (S. cerevisiae) [Source:HGNC Symbol;Acc:24671]	protein_coding
chr1+:154962679-154962731	AUAGUGU no ACACUA hsa-miR-142-3p(6mer-m8)	0.7479	0.9525	ENSG00000160688	ENST00000368433	CDS	15.7256	12.2003	6.56722	5	3.16632	1.51974	13.4171	9.64102					FLAD1	FAD1 flavin adenine dinucleotide synthetase homolog (S. cerevisiae) [Source:HGNC Symbol;Acc:24671]	protein_coding
chr1+:154990497-154990584	UAGUGCA vertebrate UGCACUA hsa-miR-130a(7mer-A1) hsa-miR-301a(7mer-A1) hsa-miR-130b(7mer-A1) hsa-miR-454(7mer-A1) hsa-miR-301b(7mer-A1) hsa-miR-4295(7mer-A1) hsa-miR-3666(7mer-A1)	0.1923	0.5213	ENSG00000160685	ENST00000368426	3'UTR	5.24187	16.2671	24.0798	24	0	0	0	0					ZBTB7B	zinc finger and BTB domain containing 7B [Source:HGNC Symbol;Acc:18668]	protein_coding
chr1+:155059790-155059853	AAAAGUG weakly CACUUUU hsa-miR-548t(7mer-m8)	0.3435	0.9737	ENSG00000143590	ENST00000368408	3'UTR	10.4837	24.4006	19.7017	22	1.58316	0	0	0					EFNA3	ephrin-A3 [Source:HGNC Symbol;Acc:3223]	protein_coding
chr1+:155109379-155109424	UAAUGCA no GCAUUA hsa-miR-155(6mer) kshv-miR-K12-11(6mer)	0.8351	0.9998	ENSG00000169241	ENST00000368404	CDS	0	4.06677	13.1344	14	12.6653	9.11845	16.7713	22.4957					RAG1AP1	recombination activating gene 1 activating protein 1 [Source:HGNC Symbol;Acc:30657]	protein_coding
chr1+:155288671-155288713	AAGGUAG no CUACCU hsa-let-7a(6mer-m8) hsa-let-7b(6mer-m8) hsa-let-7c(6mer-m8) hsa-let-7d(6mer-m8) hsa-let-7e(6mer-m8) hsa-let-7f(6mer-m8) hsa-miR-98(6mer-m8) hsa-miR-196a(6mer) hsa-let-7g(6mer-m8) hsa-let-7i(6mer-m8) hsa-miR-196b(6mer) hsa-miR-3927(6mer) UACCUU hsa-miR-548m(6mer-m8)	0.8816	0.7975	ENSG00000160752	ENST00000356657	CDS	5.24187	4.06677	0	0	23.7474	21.2764	0	9.64102					FDPS	farnesyl diphosphate synthase [Source:HGNC Symbol;Acc:3631]	protein_coding
chr1+:155854389-155854438	GUGCAAA vertebrate UUUGCAC hsa-miR-19a(7mer-m8) hsa-miR-19b(7mer-m8)	0.2831	0.942	ENSG00000132718	ENST00000368324	3'UTR	0	0	21.8907	16	0	0	0	0					SYT11	synaptotagmin XI [Source:HGNC Symbol;Acc:19239]	protein_coding
chr1+:156025174-156025216|156027768-156027791	AGGAUGA no UCAUCC hsa-miR-1255a(6mer) hsa-miR-1255b(6mer) CAUCCU kshv-miR-K12-5(6mer) hsa-miR-1265(6mer) hsa-miR-3605-5p(6mer-m8)	0.9975	0.9423	ENSG00000116586	ENST00000368305	CDS	0	0	15.3235	10	123.486	133.737	26.8341	38.5641					ROBLD3	roadblock domain containing 3 [Source:HGNC Symbol;Acc:29796]	protein_coding
chr1+:156109293-156109359	AGGCUGG no CCAGCC hsa-miR-762(6mer-m8) hsa-miR-3652(6mer) CAGCCU hsa-miR-485-5p(6mer-m8) hsa-miR-3929(6mer)	0.0013	0.8044	ENSG00000160789	ENST00000368300	3'UTR	0	4.06677	2.18907	12	0	0	0	0					LMNA	lamin A/C [Source:HGNC Symbol;Acc:6636]	protein_coding
chr1+:156109397-156109480	UGUAGUG vertebrate CACUACA hsa-miR-142-3p(7mer-A1)	0.0217	0.9937	ENSG00000160789	ENST00000368300	3'UTR	15.7256	4.06677	21.8907	18	0	0	0	0					LMNA	lamin A/C [Source:HGNC Symbol;Acc:6636]	protein_coding
chr1+:156180219-156180279	GUAGUGU vertebrate ACACUAC hsa-miR-142-3p(7mer-m8)	0.1033	0.895	ENSG00000160785	ENST00000445630	CDS,3'UTR	0	28.4674	4.37815	4	0	0	0	0					SLC25A44	solute carrier family 25, member 44 [Source:HGNC Symbol;Acc:29036]	protein_coding
chr1+:156180383-156180470	AAUAGUG no ACUAUU hsa-miR-633(6mer-m8)	0.048	0.7773	ENSG00000160785	ENST00000445630	3'UTR	15.7256	4.06677	2.18907	3	0	0	0	0					SLC25A44	solute carrier family 25, member 44 [Source:HGNC Symbol;Acc:29036]	protein_coding
chr1+:156180696-156180765	GUGCAAA vertebrate UUUGCAC hsa-miR-19a(7mer-m8) hsa-miR-19b(7mer-m8)	0.0804	0.9323	ENSG00000160785	ENST00000445630	3'UTR	15.7256	8.13354	6.56722	6	0	0	6.70853	6.42735					SLC25A44	solute carrier family 25, member 44 [Source:HGNC Symbol;Acc:29036]	protein_coding
chr1+:156181838-156181885	AAAGUGC vertebrate GCACUUU hsa-miR-17(7mer-m8) hsa-miR-20a(7mer-m8) hsa-miR-93(7mer-m8) hsa-miR-106a(7mer-m8) hsa-miR-106b(7mer-m8) hsa-miR-20b(7mer-m8) hsa-miR-526b*(7mer-m8) hsa-miR-519d(7mer-m8)	0.6676	0.7571	ENSG00000160785	ENST00000445630	3'UTR	41.935	52.868	37.2143	39	1.58316	1.51974	10.0628	12.8547					SLC25A44	solute carrier family 25, member 44 [Source:HGNC Symbol;Acc:29036]	protein_coding
chr1+:156182500-156182559	NA	0	0	ENSG00000160785	ENST00000445630	3'UTR	5.24187	4.06677	0	2	0	0	6.70853	6.42735					SLC25A44	solute carrier family 25, member 44 [Source:HGNC Symbol;Acc:29036]	protein_coding
chr1+:156209763-156209805	AGAGAAC weakly GUUCUCU hsa-miR-3925(7mer-m8)	0.8255	0.9819	ENSG00000160783	ENST00000368277	3'UTR	20.9675	8.13354	0	0	0	0	0	0					PMF1	polyamine-modulated factor 1 [Source:HGNC Symbol;Acc:9112]	protein_coding
chr1+:156756894-156756966	GUGGAAA no UUUCCA hsa-miR-875-3p(6mer-m8) hsa-miR-3688(6mer-m8) UUCCAC hsa-miR-3190(6mer)	0.9544	1	ENSG00000143294	ENST00000368201	CDS	57.6606	109.803	35.0252	31	148.817	145.895	6.70853	6.42735					PRCC	papillary renal cell carcinoma (translocation-associated) [Source:HGNC Symbol;Acc:9343]	protein_coding
chr1+:15756392-15756439	UGAUGGU no ACCAUCA kshv-miR-K12-6-3p(7mer-A1)	0.9163	0.7573	ENSG00000142634	ENST00000375975	3'UTR	0	0	8.7563	3	12.6653	19.7566	73.7938	80.3418					EFHD2	EF-hand domain family, member D2 [Source:HGNC Symbol;Acc:28670]	protein_coding
chr1+:159024751-159024820	UAGUGUU weakly AACACUA kshv-miR-K12-10a(7mer-A1) hsa-miR-4255(7mer-A1)	0.1268	0.8365	ENSG00000163565	ENST00000493884	protein_coding	0	0	17.5126	9	0	0	13.4171	44.9914					IFI16	interferon, gamma-inducible protein 16 [Source:HGNC Symbol;Acc:5395]	protein_coding
chr1+:15953286-15953293|15956819-15956844	UACUGAA weakly	0.0058	1	ENSG00000197312	ENST00000480945	CDS	0	0	6.56722	1	20.5811	27.3553	43.6054	51.4188					DDI2	DNA-damage inducible 1 homolog 2 (S. cerevisiae) [Source:HGNC Symbol;Acc:24578]	protein_coding
chr1+:15988004-15988072	UGAUGAU weakly AUCAUCA hsa-miR-3682(7mer-A1)	0.9502	0.3744	ENSG00000197312	ENST00000480945	3'UTR	0	0	2.18907	1	18.9979	31.9146	23.4799	32.1367					DDI2	DNA-damage inducible 1 homolog 2 (S. cerevisiae) [Source:HGNC Symbol;Acc:24578]	protein_coding
chr1+:15988264-15988322	NA	0	0	ENSG00000197312	ENST00000480945	3'UTR	5.24187	0	2.18907	1	15.8316	22.7961	46.9597	32.1367					DDI2	DNA-damage inducible 1 homolog 2 (S. cerevisiae) [Source:HGNC Symbol;Acc:24578]	protein_coding
chr1+:15989478-15989538	AUUGCAC vertebrate GUGCAAU hsa-miR-25(7mer-m8) hsa-miR-32(7mer-m8) hsa-miR-92a(7mer-m8) hsa-miR-363(7mer-m8) hsa-miR-367(7mer-m8) hsa-miR-92b(7mer-m8)	0.8076	0.9154	ENSG00000197312	ENST00000480945	3'UTR	47.1769	69.1351	70.0504	37	33.2463	6.07896	0	3.21367					DDI2	DNA-damage inducible 1 homolog 2 (S. cerevisiae) [Source:HGNC Symbol;Acc:24578]	protein_coding
chr1+:15990131-15990185	AGCACCA vertebrate UGGUGCU hsa-miR-29a(7mer-m8) hsa-miR-29b(7mer-m8) hsa-miR-29c(7mer-m8)	0.8131	0.9961	ENSG00000197312	ENST00000480945	3'UTR	31.4512	65.0683	89.7521	97	15.8316	25.8356	13.4171	9.64102					DDI2	DNA-damage inducible 1 homolog 2 (S. cerevisiae) [Source:HGNC Symbol;Acc:24578]	protein_coding
chr1+:15990209-15990276	AGAAUAC no GUAUUCU kshv-miR-K12-4-3p(7mer-m8)	0.3364	0.8898	ENSG00000197312	ENST00000480945	3'UTR	0	0	100.697	71	1.58316	7.59871	3.35426	9.64102					DDI2	DNA-damage inducible 1 homolog 2 (S. cerevisiae) [Source:HGNC Symbol;Acc:24578]	protein_coding
chr1+:160326839-160326892	AGAAUGC no	0.8826	0.5297	ENSG00000162736	ENST00000368066	3'UTR	0	0	37.2143	18	3.16632	3.03948	0	0					NCSTN	nicastrin [Source:HGNC Symbol;Acc:17091]	protein_coding
chr1+:160721194-160721238|160721975-160722004	UUAGUGU weakly ACACUA hsa-miR-142-3p(6mer-m8) CACUAA ebv-miR-BART1-5p(6mer-m8)	0.4944	1	ENSG00000026751	ENST00000368043	CDS	0	0	161.992	126	136.152	117.02	100.628	73.9145					SLAMF7	SLAM family member 7 [Source:HGNC Symbol;Acc:21394]	protein_coding
chr1+:160723425-160723491	UAUAGAG weakly	0.5901	0.9982	ENSG00000026751	ENST00000368043	3'UTR	0	0	67.8613	51	7.9158	4.55922	3.35426	6.42735					SLAMF7	SLAM family member 7 [Source:HGNC Symbol;Acc:21394]	protein_coding
chr1+:160723463-160723534	UAGUGUA weakly UACACUA hsa-miR-4280(7mer-A1)	0.1746	0.8258	ENSG00000026751	ENST00000368043	3'UTR	5.24187	0	74.4285	188	58.5769	56.2304	3.35426	3.21367					SLAMF7	SLAM family member 7 [Source:HGNC Symbol;Acc:21394]	protein_coding
chr1+:160724219-160724265	UUUGUUU no AAACAAA ebv-miR-BART19-3p(7mer-m8)	0.9888	0.3656	ENSG00000026751	ENST00000368043	3'UTR	0	0	0	0	94.9896	145.895	0	0					SLAMF7	SLAM family member 7 [Source:HGNC Symbol;Acc:21394]	protein_coding
chr1+:160724358-160724414	UUCAAGA no CUUGAA hsa-miR-498(6mer)	0.1548	0.6971	ENSG00000026751	ENST00000368043	3'UTR	0	0	13.1344	5	0	0	0	0					SLAMF7	SLAM family member 7 [Source:HGNC Symbol;Acc:21394]	protein_coding
chr1+:160724552-160724587	AAGAUAG weakly CUAUCU ebv-miR-BART16(6mer-m8)	0.8057	0.5439	ENSG00000026751	ENST00000368043	3'UTR	0	0	0	0	18.9979	15.1974	0	0					SLAMF7	SLAM family member 7 [Source:HGNC Symbol;Acc:21394]	protein_coding
chr1+:160783463-160783511	UUACAGG weakly CCUGUAA kshv-miR-K12-1(7mer-m8)	0.2426	0.5938	ENSG00000122224	ENST00000368041	CDS	0	0	15.3235	33	12.6653	10.6382	10.0628	6.42735					LY9	lymphocyte antigen 9 [Source:HGNC Symbol;Acc:6730]	protein_coding
chr1+:160797906-160797966	AGUGUUG no CAACACU kshv-miR-K12-10a(7mer-m8)	0.3625	0.8511	ENSG00000122224	ENST00000368041	3'UTR	0	0	13.1344	9	0	0	0	0					LY9	lymphocyte antigen 9 [Source:HGNC Symbol;Acc:6730]	protein_coding
chr1+:161127093-161127107|161127406-161127437	AGUAGGA no	0.5893	0.5359	ENSG00000143222	ENST00000368003	CDS	10.4837	8.13354	0	3	12.6653	22.7961	6.70853	0					UFC1	ubiquitin-fold modifier conjugating enzyme 1 [Source:HGNC Symbol;Acc:26941]	protein_coding
chr1+:161128319-161128378	UAAGUGU weakly ACACUUA hsa-miR-595(7mer-A1)	0.1744	0.2853	ENSG00000143222	ENST00000368003	3'UTR	15.7256	4.06677	0	0	1.58316	1.51974	0	0					UFC1	ubiquitin-fold modifier conjugating enzyme 1 [Source:HGNC Symbol;Acc:26941]	protein_coding
chr1+:161135449-161135507	AAAGUGA weakly UCACUUU hsa-miR-3609(7mer-m8)	0.861	0.749	ENSG00000143258	ENST00000487163	protein_coding	15.7256	36.6009	17.5126	19	0	0	0	0					USP21	ubiquitin specific peptidase 21 [Source:HGNC Symbol;Acc:12620]	protein_coding
chr1+:161179649-161179715	AGCAGCA vertebrate UGCUGCU hsa-miR-15a(7mer-m8) hsa-miR-16(7mer-m8) hsa-miR-15b(7mer-m8) hsa-miR-195(7mer-m8) hsa-miR-424(7mer-m8) hsa-miR-497(7mer-m8)	0.1901	0.9999	ENSG00000158864	ENST00000367993	CDS	10.4837	12.2003	19.7017	32	0	0	0	0					NDUFS2	NADH dehydrogenase (ubiquinone) Fe-S protein 2, 49kDa (NADH-coenzyme Q reductase) [Source:HGNC Symbol;Acc:7708]	protein_coding
chr1+:161183169-161183248	AAAGUGA weakly UCACUUU hsa-miR-3609(7mer-m8)	0.5306	0.6393	ENSG00000158864	ENST00000367993	CDS	47.1769	36.6009	21.8907	31	0	0	0	0					NDUFS2	NADH dehydrogenase (ubiquinone) Fe-S protein 2, 49kDa (NADH-coenzyme Q reductase) [Source:HGNC Symbol;Acc:7708]	protein_coding
chr1+:161298247-161298287	UAGAUAG no CUAUCUA ebv-miR-BART16(7mer-m8)	0.3198	0.893	ENSG00000143252	ENST00000367975	CDS	0	0	24.0798	19	49.0779	41.033	33.5426	41.7777					SDHC	succinate dehydrogenase complex, subunit C, integral membrane protein, 15kDa [Source:HGNC Symbol;Acc:10682]	protein_coding
chr1+:161326545-161326611	GUGCAAA vertebrate UUUGCAC hsa-miR-19a(7mer-m8) hsa-miR-19b(7mer-m8)	0.5366	0.8827	ENSG00000143252	ENST00000367975	CDS	26.2094	44.7345	15.3235	23	0	0	0	0					SDHC	succinate dehydrogenase complex, subunit C, integral membrane protein, 15kDa [Source:HGNC Symbol;Acc:10682]	protein_coding
chr1+:161683173-161683239	AUUUAUU no	0.4989	0.7407	ENSG00000132185	ENST00000367959	3'UTR	20.9675	24.4006	0	0	0	0	0	0					FCRLA	Fc receptor-like A [Source:HGNC Symbol;Acc:18504]	protein_coding
chr1+:161683213-161683239	AAAUAAA no	0.3567	0.3786	ENSG00000132185	ENST00000367959	3'UTR	10.4837	4.06677	0	0	0	0	0	0					FCRLA	Fc receptor-like A [Source:HGNC Symbol;Acc:18504]	protein_coding
chr1+:161683218-161683270	UGUGCAG weakly CUGCACA hsa-miR-143*(7mer-A1)	0.2753	0.9999	ENSG00000132185	ENST00000367959	3'UTR	15.7256	8.13354	0	0	0	0	0	0					FCRLA	Fc receptor-like A [Source:HGNC Symbol;Acc:18504]	protein_coding
chr1+:161751765-161751789|161753779-161753785	ACUGUAC no GUACAG hsa-miR-486-5p(6mer-m8) UACAGU kshv-miR-K12-2(6mer) hsa-miR-1183(6mer)	0.6149	1	ENSG00000118217	ENST00000367942	CDS	0	0	0	1	1.58316	4.55922	10.0628	16.0684					ATF6	activating transcription factor 6 [Source:HGNC Symbol;Acc:791]	protein_coding
chr1+:161933487-161933569	UAGUGCA vertebrate UGCACUA hsa-miR-130a(7mer-A1) hsa-miR-301a(7mer-A1) hsa-miR-130b(7mer-A1) hsa-miR-454(7mer-A1) hsa-miR-301b(7mer-A1) hsa-miR-4295(7mer-A1) hsa-miR-3666(7mer-A1)	0.8021	0.7033	ENSG00000118217	ENST00000367942	3'UTR	57.6606	85.4022	221.097	185	387.874	413.37	244.861	273.162					ATF6	activating transcription factor 6 [Source:HGNC Symbol;Acc:791]	protein_coding
chr1+:16200032-16200094	GUAGUGA no UCACUA hsa-miR-921(6mer) hsa-miR-3606(6mer) CACUAC hsa-miR-142-3p(6mer)	0.905	0.9482	ENSG00000065526	ENST00000438066	5'UTR	41.935	52.868	179.504	132	23.7474	22.7961	134.171	109.265					SPEN	spen homolog, transcriptional regulator (Drosophila) [Source:HGNC Symbol;Acc:17575]	protein_coding
chr1+:16200126-16200165	NA	0	0	ENSG00000065526	ENST00000438066	5'UTR	0	0	6.56722	3	1.58316	1.51974	46.9597	32.1367					SPEN	spen homolog, transcriptional regulator (Drosophila) [Source:HGNC Symbol;Acc:17575]	protein_coding
chr1+:16200619-16200648	GAUAGCA no	0.0555	0.6618	ENSG00000065526	ENST00000375753	CDS	5.24187	0	2.18907	7	1.58316	7.59871	6.70853	35.3504					SPEN	spen homolog, transcriptional regulator (Drosophila) [Source:HGNC Symbol;Acc:17575]	protein_coding
chr1+:162468054-162468058|162469744-162469826	AAAAGUG weakly CACUUUU hsa-miR-548t(7mer-m8)	0.1874	0.9269	ENSG00000152332	ENST00000489294	CDS	0	0	4.37815	13	49.0779	44.0725	46.9597	28.9231					UHMK1	U2AF homology motif (UHM) kinase 1 [Source:HGNC Symbol;Acc:19683]	protein_coding
chr1+:162470797-162470853	UGAGAAC vertebrate GUUCUCA hsa-miR-146a(7mer-A1) hsa-miR-146b-5p(7mer-A1) hsa-miR-589(7mer-A1)	0.8614	1	ENSG00000152332	ENST00000489294	CDS	36.6931	44.7345	4.37815	2	12.6653	30.3948	6.70853	9.64102					UHMK1	U2AF homology motif (UHM) kinase 1 [Source:HGNC Symbol;Acc:19683]	protein_coding
chr1+:162473598-162473638	UAGGUGA no UCACCU hsa-miR-125a-3p(6mer-m8) ebv-miR-BART5(6mer-m8)	0.8026	1	ENSG00000152332	ENST00000489294	CDS	0	0	0	0	39.579	39.5133	0	0					UHMK1	U2AF homology motif (UHM) kinase 1 [Source:HGNC Symbol;Acc:19683]	protein_coding
chr1+:162482333-162482366|162482514-162482534	GAGGGGC weakly GCCCCUC hsa-miR-423-5p(7mer-m8) hsa-miR-3184(7mer-m8)	0.4775	0.5377	ENSG00000152332	ENST00000489294	CDS	20.9675	20.3339	21.8907	14	3.16632	7.59871	0	0					UHMK1	U2AF homology motif (UHM) kinase 1 [Source:HGNC Symbol;Acc:19683]	protein_coding
chr1+:162492435-162492487	AAAUAAA no	0.7561	0.68	ENSG00000152332	ENST00000489294	3'UTR	0	0	2.18907	0	3.16632	4.55922	6.70853	6.42735					UHMK1	U2AF homology motif (UHM) kinase 1 [Source:HGNC Symbol;Acc:19683]	protein_coding
chr1+:162492798-162492844	CACAGUA no UACUGU hsa-miR-101(6mer) hsa-miR-144(6mer) ACUGUG hsa-miR-27a(6mer-m8) hsa-miR-27b(6mer-m8) hsa-miR-128(6mer) hsa-miR-3681*(6mer)	0.4242	0.4701	ENSG00000152332	ENST00000489294	3'UTR	5.24187	0	13.1344	9	0	0	0	0					UHMK1	U2AF homology motif (UHM) kinase 1 [Source:HGNC Symbol;Acc:19683]	protein_coding
chr1+:162492935-162492994	UGUGCAA vertebrate UUGCACA hsa-miR-19a(7mer-A1) hsa-miR-19b(7mer-A1)	0.4697	0.9638	ENSG00000152332	ENST00000489294	3'UTR	41.935	61.0016	19.7017	33	17.4148	25.8356	0	0					UHMK1	U2AF homology motif (UHM) kinase 1 [Source:HGNC Symbol;Acc:19683]	protein_coding
chr1+:162493043-162493113	GGAAGAA no UUCUUC hsa-miR-3185(6mer) UCUUCC hsa-miR-7(6mer)	0.0963	0.7107	ENSG00000152332	ENST00000489294	3'UTR	5.24187	8.13354	0	2	0	0	0	0					UHMK1	U2AF homology motif (UHM) kinase 1 [Source:HGNC Symbol;Acc:19683]	protein_coding
chr1+:162493334-162493380	GGUAGAG weakly UCUACC hsa-miR-379(6mer) hsa-miR-3132(6mer-m8) hsa-miR-3927(6mer-m8)	0.4719	0.9963	ENSG00000152332	ENST00000489294	3'UTR	5.24187	4.06677	24.0798	33	0	3.03948	0	0					UHMK1	U2AF homology motif (UHM) kinase 1 [Source:HGNC Symbol;Acc:19683]	protein_coding
chr1+:162494353-162494401	CUUGCCC no GGCAAG hsa-miR-1915*(6mer-m8)	0.6075	0.5466	ENSG00000152332	ENST00000489294	3'UTR	0	0	2.18907	2	15.8316	18.2369	0	0					UHMK1	U2AF homology motif (UHM) kinase 1 [Source:HGNC Symbol;Acc:19683]	protein_coding
chr1+:162494388-162494446	GGAGAGA mammals UCUCUCC hsa-miR-185(7mer-m8) hsa-miR-4306(7mer-m8)	0.2618	0.2529	ENSG00000152332	ENST00000489294	3'UTR	5.24187	12.2003	6.56722	10	0	0	0	3.21367					UHMK1	U2AF homology motif (UHM) kinase 1 [Source:HGNC Symbol;Acc:19683]	protein_coding
chr1+:162494440-162494483	CUGCAGU no ACUGCAG hsa-miR-17*(7mer-m8)	0.7364	0.9987	ENSG00000152332	ENST00000489294	3'UTR	0	0	0	0	22.1642	36.4738	13.4171	22.4957					UHMK1	U2AF homology motif (UHM) kinase 1 [Source:HGNC Symbol;Acc:19683]	protein_coding
chr1+:162494452-162494525	AGCAGCA vertebrate UGCUGCU hsa-miR-15a(7mer-m8) hsa-miR-16(7mer-m8) hsa-miR-15b(7mer-m8) hsa-miR-195(7mer-m8) hsa-miR-424(7mer-m8) hsa-miR-497(7mer-m8)	0.5663	0.9161	ENSG00000152332	ENST00000489294	3'UTR	0	8.13354	8.7563	6	31.6632	28.8751	6.70853	3.21367					UHMK1	U2AF homology motif (UHM) kinase 1 [Source:HGNC Symbol;Acc:19683]	protein_coding
chr1+:162494512-162494574	AAUGUAU no AUACAU hsa-miR-3171(6mer-m8) hsa-miR-3924(6mer-m8)	0.0166	0.4458	ENSG00000152332	ENST00000489294	3'UTR	0	0	0	1	52.2443	60.7896	6.70853	22.4957					UHMK1	U2AF homology motif (UHM) kinase 1 [Source:HGNC Symbol;Acc:19683]	protein_coding
chr1+:162496150-162496209	GAUGGUU no AACCAUC kshv-miR-K12-6-3p(7mer-m8)	0.1062	0.4829	ENSG00000152332	ENST00000489294	3'UTR	0	4.06677	15.3235	11	1.58316	1.51974	0	3.21367				x	UHMK1	U2AF homology motif (UHM) kinase 1 [Source:HGNC Symbol;Acc:19683]	protein_coding
chr1+:162496214-162496260	GUGAUUC no	0.5643	0.5366	ENSG00000152332	ENST00000489294	3'UTR	0	4.06677	13.1344	4	20.5811	15.1974	0	3.21367					UHMK1	U2AF homology motif (UHM) kinase 1 [Source:HGNC Symbol;Acc:19683]	protein_coding
chr1+:162497227-162497315	AGAAUAA no UAUUCU kshv-miR-K12-4-3p(6mer)	0.966	0.8559	ENSG00000152332	ENST00000489294	3'UTR	0	0	24.0798	17	11.0821	4.55922	10.0628	6.42735					UHMK1	U2AF homology motif (UHM) kinase 1 [Source:HGNC Symbol;Acc:19683]	protein_coding
chr1+:162497281-162497338	AAAGUGC vertebrate GCACUUU hsa-miR-17(7mer-m8) hsa-miR-20a(7mer-m8) hsa-miR-93(7mer-m8) hsa-miR-106a(7mer-m8) hsa-miR-106b(7mer-m8) hsa-miR-20b(7mer-m8) hsa-miR-526b*(7mer-m8) hsa-miR-519d(7mer-m8)	0.3652	0.9427	ENSG00000152332	ENST00000489294	3'UTR	10.4837	32.5342	2.18907	6	4.74948	6.07896	0	0					UHMK1	U2AF homology motif (UHM) kinase 1 [Source:HGNC Symbol;Acc:19683]	protein_coding
chr1+:162497423-162497465	AGCAGUC weakly GACUGCU hsa-miR-4274(7mer-m8)	0.9816	1	ENSG00000152332	ENST00000489294	3'UTR	5.24187	4.06677	0	2	41.1621	34.954	0	0					UHMK1	U2AF homology motif (UHM) kinase 1 [Source:HGNC Symbol;Acc:19683]	protein_coding
chr1+:162498334-162498403	GUGCAAA vertebrate UUUGCAC hsa-miR-19a(7mer-m8) hsa-miR-19b(7mer-m8)	0.8667	0.9462	ENSG00000152332	ENST00000489294	3'UTR	152.014	260.273	183.882	161	242.223	247.718	0	12.8547					UHMK1	U2AF homology motif (UHM) kinase 1 [Source:HGNC Symbol;Acc:19683]	protein_coding
chr1+:162498376-162498436	UAGUGCA vertebrate UGCACUA hsa-miR-130a(7mer-A1) hsa-miR-301a(7mer-A1) hsa-miR-130b(7mer-A1) hsa-miR-454(7mer-A1) hsa-miR-301b(7mer-A1) hsa-miR-4295(7mer-A1) hsa-miR-3666(7mer-A1)	0.1391	0.9883	ENSG00000152332	ENST00000489294	3'UTR	0	44.7345	8.7563	6	0	0	0	0					UHMK1	U2AF homology motif (UHM) kinase 1 [Source:HGNC Symbol;Acc:19683]	protein_coding
chr1+:162498968-162499025	CACAGUG vertebrate CACUGUG hsa-miR-128(7mer-m8) hsa-miR-3681*(7mer-m8)	0.1408	0.3504	ENSG00000152332	ENST00000489294	3'UTR	10.4837	0	4.37815	1	0	0	0	0					UHMK1	U2AF homology motif (UHM) kinase 1 [Source:HGNC Symbol;Acc:19683]	protein_coding
chr1+:162531563-162531567|162535801-162535841	UGUAGAA no UCUACA hsa-miR-3668(6mer-m8) hsa-miR-3674(6mer-m8)	0.484	0.9337	ENSG00000117143	ENST00000271469	5'UTR	0	0	2.18907	1	37.9958	25.8356	127.462	115.692					UAP1	UDP-N-acteylglucosamine pyrophosphorylase 1 [Source:HGNC Symbol;Acc:12457]	protein_coding
chr1+:16260286-16260352	UGUCAAC mammals GUUGACA hsa-miR-505(7mer-A1)	0.2464	0.5551	ENSG00000065526	ENST00000375759	CDS	0	4.06677	4.37815	11	0	3.03948	53.6682	102.838					SPEN	spen homolog, transcriptional regulator (Drosophila) [Source:HGNC Symbol;Acc:17575]	protein_coding
chr1+:16264084-16264137	UGAACCA no	0.7148	0.9944	ENSG00000065526	ENST00000375759	CDS	0	40.6677	0	0	0	0	0	0					SPEN	spen homolog, transcriptional regulator (Drosophila) [Source:HGNC Symbol;Acc:17575]	protein_coding
chr1+:16266625-16266679	UGGCACA no GUGCCA hsa-miR-96(6mer-m8) hsa-miR-183(6mer-m8) hsa-miR-1271(6mer-m8)	0.8052	1	ENSG00000065526	ENST00000375759	3'UTR	47.1769	85.4022	37.2143	24	12.6653	4.55922	0	9.64102					SPEN	spen homolog, transcriptional regulator (Drosophila) [Source:HGNC Symbol;Acc:17575]	protein_coding
chr1+:16266814-16266876	AGUGUUA no UAACAC hsa-miR-3152(6mer) AACACU kshv-miR-K12-10a(6mer) hsa-miR-4255(6mer) hsa-miR-3659(6mer-m8)	0.3209	0.4916	ENSG00000065526	ENST00000375759	3'UTR	0	4.06677	6.56722	3	3.16632	0	3.35426	6.42735					SPEN	spen homolog, transcriptional regulator (Drosophila) [Source:HGNC Symbol;Acc:17575]	protein_coding
chr1+:163306560-163306595	UAAUGCC vertebrate GGCAUUA hsa-miR-365(7mer-A1)	0.3521	0.8148	ENSG00000143228	ENST00000271452	CDS	0	0	4.37815	1	9.49896	9.11845	124.108	131.761					NUF2	NUF2, NDC80 kinetochore complex component, homolog (S. cerevisiae) [Source:HGNC Symbol;Acc:14621]	protein_coding
chr1+:163306570-163306602	AUAAAGU weakly ACUUUAU hsa-miR-142-5p(7mer-m8)	0.1107	0.6389	ENSG00000143228	ENST00000271452	CDS	0	0	4.37815	1	14.2484	6.07896	20.1256	25.7094					NUF2	NUF2, NDC80 kinetochore complex component, homolog (S. cerevisiae) [Source:HGNC Symbol;Acc:14621]	protein_coding
chr1+:164529176-164529237	UGAUGGU no ACCAUCA kshv-miR-K12-6-3p(7mer-A1)	0.8867	0.8334	ENSG00000185630	ENST00000420696	CDS	0	0	19.7017	7	61.7432	57.7502	63.731	57.8461					PBX1	pre-B-cell leukemia homeobox 1 [Source:HGNC Symbol;Acc:8632]	protein_coding
chr1+:164820948-164821004	AGUAUCA no	0.925	0.7974	ENSG00000185630	ENST00000420696	3'UTR	0	0	8.7563	11	23.7474	13.6777	40.2512	16.0684					PBX1	pre-B-cell leukemia homeobox 1 [Source:HGNC Symbol;Acc:8632]	protein_coding
chr1+:165863506-165863536	AAAGUGA weakly UCACUUU hsa-miR-3609(7mer-m8)	0.3707	0.5537	ENSG00000143179	ENST00000464197	protein_coding	10.4837	8.13354	0	1	0	0	0	0					UCK2	uridine-cytidine kinase 2 [Source:HGNC Symbol;Acc:12562]	protein_coding
chr1+:165877223-165877299	UGGCACA no GUGCCA hsa-miR-96(6mer-m8) hsa-miR-183(6mer-m8) hsa-miR-1271(6mer-m8)	0.9774	0.9995	ENSG00000143179	ENST00000367879	3'UTR	5.24187	20.3339	32.8361	49	69.659	47.112	20.1256	25.7094					UCK2	uridine-cytidine kinase 2 [Source:HGNC Symbol;Acc:12562]	protein_coding
chr1+:165878428-165878488	UCAGGCU weakly AGCCUGA hsa-miR-484(7mer-A1) hsa-miR-3155(7mer-A1)	0.0759	0.6188	ENSG00000143179	ENST00000479872	protein_coding	10.4837	24.4006	15.3235	18	0	0	3.35426	0					UCK2	uridine-cytidine kinase 2 [Source:HGNC Symbol;Acc:12562]	protein_coding
chr1+:165879755-165879823	UUAGUGU weakly ACACUA hsa-miR-142-3p(6mer-m8) CACUAA ebv-miR-BART1-5p(6mer-m8)	0.8906	1	ENSG00000143179	ENST00000479872	protein_coding	0	12.2003	59.105	51	45.9116	65.3489	20.1256	44.9914					UCK2	uridine-cytidine kinase 2 [Source:HGNC Symbol;Acc:12562]	protein_coding
chr1+:165880223-165880275	AAAGUGC vertebrate GCACUUU hsa-miR-17(7mer-m8) hsa-miR-20a(7mer-m8) hsa-miR-93(7mer-m8) hsa-miR-106a(7mer-m8) hsa-miR-106b(7mer-m8) hsa-miR-20b(7mer-m8) hsa-miR-526b*(7mer-m8) hsa-miR-519d(7mer-m8)	0.7813	0.7503	ENSG00000143179	ENST00000479872	protein_coding	10.4837	28.4674	10.9454	17	0	0	0	0					UCK2	uridine-cytidine kinase 2 [Source:HGNC Symbol;Acc:12562]	protein_coding
chr1+:166818221-166818258	AAAGUGC vertebrate GCACUUU hsa-miR-17(7mer-m8) hsa-miR-20a(7mer-m8) hsa-miR-93(7mer-m8) hsa-miR-106a(7mer-m8) hsa-miR-106b(7mer-m8) hsa-miR-20b(7mer-m8) hsa-miR-526b*(7mer-m8) hsa-miR-519d(7mer-m8)	0.2634	0.9999	ENSG00000143157	ENST00000367875	CDS	10.4837	12.2003	4.37815	2	0	0	0	0	x				POGK	pogo transposable element with KRAB domain [Source:HGNC Symbol;Acc:18800]	protein_coding
chr1+:166820049-166820084	GGAAGAC vertebrate GUCUUCC hsa-miR-7(7mer-m8)	0.2422	0.8169	ENSG00000143157	ENST00000367875	3'UTR	0	4.06677	24.0798	13	0	0	0	0					POGK	pogo transposable element with KRAB domain [Source:HGNC Symbol;Acc:18800]	protein_coding
chr1+:166820405-166820477	CCAGCAA no UUGCUG hsa-miR-545(6mer) hsa-miR-3120(6mer-m8) UGCUGG hsa-miR-338-3p(6mer) hsa-miR-634(6mer-m8)	0.5058	0.7139	ENSG00000143157	ENST00000367875	3'UTR	10.4837	0	6.56722	5	0	0	0	0					POGK	pogo transposable element with KRAB domain [Source:HGNC Symbol;Acc:18800]	protein_coding
chr1+:166820477-166820525	ACUGUAG weakly CUACAGU kshv-miR-K12-2(7mer-m8) hsa-miR-1183(7mer-m8)	0.2356	0.768	ENSG00000143157	ENST00000367875	3'UTR	0	0	201.395	175	0	0	0	0				x	POGK	pogo transposable element with KRAB domain [Source:HGNC Symbol;Acc:18800]	protein_coding
chr1+:166821445-166821520	AAAGUGC vertebrate GCACUUU hsa-miR-17(7mer-m8) hsa-miR-20a(7mer-m8) hsa-miR-93(7mer-m8) hsa-miR-106a(7mer-m8) hsa-miR-106b(7mer-m8) hsa-miR-20b(7mer-m8) hsa-miR-526b*(7mer-m8) hsa-miR-519d(7mer-m8)	0.7777	0.7498	ENSG00000143157	ENST00000367875	3'UTR	20.9675	12.2003	56.9159	76	140.901	155.014	43.6054	73.9145					POGK	pogo transposable element with KRAB domain [Source:HGNC Symbol;Acc:18800]	protein_coding
chr1+:166822162-166822183	UGGUGUU weakly AACACCA kshv-miR-K12-10b(7mer-A1)	0.9133	0.5103	ENSG00000143157	ENST00000367875	3'UTR	0	0	0	0	1.58316	3.03948	43.6054	32.1367					POGK	pogo transposable element with KRAB domain [Source:HGNC Symbol;Acc:18800]	protein_coding
chr1+:166822653-166822697	GAUGAGU no CUCAUC hsa-miR-1255a(6mer-m8) hsa-miR-1255b(6mer-m8)	0.6868	0.999	ENSG00000143157	ENST00000367875	3'UTR	0	0	6.56722	12	0	0	16.7713	12.8547					POGK	pogo transposable element with KRAB domain [Source:HGNC Symbol;Acc:18800]	protein_coding
chr1+:166823177-166823243	UAGACGC no GCGUCU hsa-miR-139-3p(6mer-m8)	0.9601	1	ENSG00000143157	ENST00000367875	3'UTR	0	0	24.0798	38	45.9116	42.5528	264.987	266.735					POGK	pogo transposable element with KRAB domain [Source:HGNC Symbol;Acc:18800]	protein_coding
chr1+:166823528-166823571	UCAGUGG no CCACUGA hsa-miR-194*(7mer-A1) ebv-miR-BART15(7mer-m8)	0.9676	0.9909	ENSG00000143157	ENST00000367875	3'UTR	0	0	0	0	72.8253	69.9081	0	0					POGK	pogo transposable element with KRAB domain [Source:HGNC Symbol;Acc:18800]	protein_coding
chr1+:166823587-166823663	UUCUAGG no	0.1672	0.7258	ENSG00000143157	ENST00000367875	3'UTR	10.4837	4.06677	4.37815	2	0	4.55922	0	0					POGK	pogo transposable element with KRAB domain [Source:HGNC Symbol;Acc:18800]	protein_coding
chr1+:16721646-16721706	GGAGGCG no CGCCUC hsa-miR-3197(6mer) GCCUCC hsa-miR-650(6mer) hsa-miR-3612(6mer)	0.1746	0.5698	ENSG00000055070	ENST00000401088	3'UTR	10.4837	8.13354	10.9454	8	0	0	0	0					C1orf144	UPF0485 protein C1orf144 (Putative MAPK-activating protein PM18/PM20/PM22) [Source:UniProtKB/Swiss-Prot;Acc:Q7Z422]	protein_coding
chr1+:16721706-16721792	AGUGCAA vertebrate UUGCACU hsa-miR-130a(7mer-m8) hsa-miR-301a(7mer-m8) hsa-miR-130b(7mer-m8) hsa-miR-454(7mer-m8) hsa-miR-301b(7mer-m8) hsa-miR-4295(7mer-m8) hsa-miR-3666(7mer-m8)	0.3201	0.8638	ENSG00000055070	ENST00000401088	3'UTR	41.935	44.7345	26.2689	17	3.16632	0	0	0					C1orf144	UPF0485 protein C1orf144 (Putative MAPK-activating protein PM18/PM20/PM22) [Source:UniProtKB/Swiss-Prot;Acc:Q7Z422]	protein_coding
chr1+:16723436-16723486	UAGCAGC vertebrate GCUGCUA hsa-miR-15a(7mer-A1) hsa-miR-16(7mer-A1) hsa-miR-15b(7mer-A1) hsa-miR-195(7mer-A1) hsa-miR-424(7mer-A1) hsa-miR-497(7mer-A1) hsa-miR-503(7mer-A1) hsa-miR-646(7mer-A1)	0.3496	0.3871	ENSG00000055070	ENST00000401088	3'UTR	10.4837	8.13354	4.37815	4	12.6653	9.11845	23.4799	22.4957					C1orf144	UPF0485 protein C1orf144 (Putative MAPK-activating protein PM18/PM20/PM22) [Source:UniProtKB/Swiss-Prot;Acc:Q7Z422]	protein_coding
chr1+:167365557-167365588	AGAUGGU no ACCAUC kshv-miR-K12-6-3p(6mer) hsa-miR-1193(6mer-m8)	0.7716	0.973	ENSG00000143190	ENST00000367865	CDS	0	0	35.0252	16	45.9116	31.9146	46.9597	28.9231					POU2F1	POU class 2 homeobox 1 [Source:HGNC Symbol;Acc:9212]	protein_coding
chr1+:167386058-167386112	NA	0	0	ENSG00000143190	ENST00000367865	3'UTR	10.4837	4.06677	8.7563	3	0	0	0	0					POU2F1	POU class 2 homeobox 1 [Source:HGNC Symbol;Acc:9212]	protein_coding
chr1+:167386434-167386506	UAAGUGC vertebrate GCACUUA hsa-miR-302a(7mer-A1) hsa-miR-302b(7mer-A1) hsa-miR-302c(7mer-A1) hsa-miR-302d(7mer-A1) hsa-miR-372(7mer-A1) hsa-miR-373(7mer-A1) hsa-miR-520e(7mer-A1) hsa-miR-519c-3p(7mer-A1) hsa-miR-520a-3p(7mer-A1) hsa-miR-519b-3p(7mer-A1) hsa-miR-520b(7mer-A1) hsa-miR-520c-3p(7mer-A1) hsa-miR-520d-3p(7mer-A1) hsa-miR-519a(7mer-A1) hsa-miR-302e(7mer-A1)	0.1915	0.9329	ENSG00000143190	ENST00000367865	3'UTR	5.24187	0	13.1344	9	4.74948	1.51974	3.35426	3.21367					POU2F1	POU class 2 homeobox 1 [Source:HGNC Symbol;Acc:9212]	protein_coding
chr1+:167387306-167387355	UUCAAGC weakly GCUUGAA hsa-miR-498(7mer-m8)	0.9442	0.8794	ENSG00000143190	ENST00000367865	3'UTR	5.24187	0	10.9454	13	45.9116	48.6317	53.6682	44.9914					POU2F1	POU class 2 homeobox 1 [Source:HGNC Symbol;Acc:9212]	protein_coding
chr1+:167387554-167387605	AAAGUGA weakly UCACUUU hsa-miR-3609(7mer-m8)	0.7048	0.7444	ENSG00000143190	ENST00000367865	3'UTR	20.9675	4.06677	24.0798	32	4.74948	3.03948	6.70853	6.42735					POU2F1	POU class 2 homeobox 1 [Source:HGNC Symbol;Acc:9212]	protein_coding
chr1+:167387730-167387790	ACCAGCA weakly UGCUGGU hsa-miR-634(7mer-m8)	0.8082	0.9151	ENSG00000143190	ENST00000367865	3'UTR	0	0	28.458	29	9.49896	7.59871	0	0					POU2F1	POU class 2 homeobox 1 [Source:HGNC Symbol;Acc:9212]	protein_coding
chr1+:167388254-167388308	AGAAUAU no UAUUCU kshv-miR-K12-4-3p(6mer)	0.2361	0.7335	ENSG00000143190	ENST00000367865	3'UTR	0	4.06677	21.8907	38	22.1642	28.8751	30.1884	22.4957					POU2F1	POU class 2 homeobox 1 [Source:HGNC Symbol;Acc:9212]	protein_coding
chr1+:167393817-167393885	AUGAUGC weakly GCAUCAU hsa-miR-1322(7mer-m8)	0.794	1	ENSG00000143190	ENST00000367865	3'UTR	0	0	19.7017	7	58.5769	47.112	70.4396	61.0598					POU2F1	POU class 2 homeobox 1 [Source:HGNC Symbol;Acc:9212]	protein_coding
chr1+:167394201-167394253	AAAGUGA weakly UCACUUU hsa-miR-3609(7mer-m8)	0.9427	0.6521	ENSG00000143190	ENST00000367865	3'UTR	0	0	2.18907	2	31.6632	44.0725	3.35426	0					POU2F1	POU class 2 homeobox 1 [Source:HGNC Symbol;Acc:9212]	protein_coding
chr1+:167395613-167395652	AGGCAGU weakly ACUGCCU hsa-miR-34b*(7mer-m8) hsa-miR-449c(7mer-m8)	0.5636	0.9998	ENSG00000143190	ENST00000367865	3'UTR	0	12.2003	8.7563	9	104.489	95.7437	0	0					POU2F1	POU class 2 homeobox 1 [Source:HGNC Symbol;Acc:9212]	protein_coding
chr1+:167396485-167396529	UACAGUA vertebrate UACUGUA hsa-miR-101(7mer-A1) hsa-miR-144(7mer-A1)	0.1561	0.9877	ENSG00000143190	ENST00000367865	3'UTR	0	0	0	4	28.4969	19.7566	73.7938	77.1281					POU2F1	POU class 2 homeobox 1 [Source:HGNC Symbol;Acc:9212]	protein_coding
chr1+:167396542-167396569	GAUGGUU no AACCAUC kshv-miR-K12-6-3p(7mer-m8)	0.7129	0.5939	ENSG00000143190	ENST00000367865	3'UTR	0	0	8.7563	16	33.2463	25.8356	57.0225	77.1281					POU2F1	POU class 2 homeobox 1 [Source:HGNC Symbol;Acc:9212]	protein_coding
chr1+:167757365-167757408	UGGGUAC weakly GUACCCA hsa-miR-1225-5p(7mer-m8)	0.907	0.9992	ENSG00000197965	ENST00000359523	3'UTR	5.24187	20.3339	61.2941	57	14.2484	9.11845	0	0					MPZL1	myelin protein zero-like 1 [Source:HGNC Symbol;Acc:7226]	protein_coding
chr1+:167758382-167758441	GUAGUGA no UCACUA hsa-miR-921(6mer) hsa-miR-3606(6mer) CACUAC hsa-miR-142-3p(6mer)	0.4642	0.896	ENSG00000197965	ENST00000359523	3'UTR	115.321	85.4022	91.9411	156	45.9116	41.033	13.4171	25.7094					MPZL1	myelin protein zero-like 1 [Source:HGNC Symbol;Acc:7226]	protein_coding
chr1+:16782369-16782388|16785336-16785348	GAUCCUG no	0.9615	0.6715	ENSG00000157191	ENST00000337132	CDS	0	0	0	0	3.16632	3.03948	16.7713	25.7094					NECAP2	NECAP endocytosis associated 2 [Source:HGNC Symbol;Acc:25528]	protein_coding
chr1+:168169276-168169338	UAGUGAG weakly CUCACUA hsa-miR-921(7mer-m8) hsa-miR-3174(7mer-A1)	0.8334	0.9981	ENSG00000143155	ENST00000401737	CDS,3'UTR	5.24187	12.2003	37.2143	33	56.9937	66.8686	13.4171	12.8547					TIPRL	TIP41, TOR signaling pathway regulator-like (S. cerevisiae) [Source:HGNC Symbol;Acc:30231]	protein_coding
chr1+:168169572-168169651	UAGUGUU weakly AACACUA kshv-miR-K12-10a(7mer-A1) hsa-miR-4255(7mer-A1)	0.8836	0.8226	ENSG00000143155	ENST00000401737	3'UTR	0	16.2671	6.56722	8	15.8316	21.2764	20.1256	9.64102					TIPRL	TIP41, TOR signaling pathway regulator-like (S. cerevisiae) [Source:HGNC Symbol;Acc:30231]	protein_coding
chr1+:168205949-168205997	AAGUGCA weakly UGCACUU hsa-miR-519c-3p(7mer-m8) hsa-miR-519b-3p(7mer-m8) hsa-miR-519a(7mer-m8)	0.4193	0.88	ENSG00000213064	ENST00000271375	CDS	20.9675	12.2003	6.56722	16	0	4.55922	0	0					SFT2D2	SFT2 domain containing 2 [Source:HGNC Symbol;Acc:25140]	protein_coding
chr1+:168211756-168211816	ACUGGCC vertebrate GGCCAGU hsa-miR-193a-3p(7mer-m8) hsa-miR-193b(7mer-m8)	0.3305	1	ENSG00000213064	ENST00000271375	CDS,3'UTR	15.7256	56.9348	6.56722	15	7.9158	9.11845	0	0					SFT2D2	SFT2 domain containing 2 [Source:HGNC Symbol;Acc:25140]	protein_coding
chr1+:169356833-169356875	GUGCAAA vertebrate UUUGCAC hsa-miR-19a(7mer-m8) hsa-miR-19b(7mer-m8)	0.4243	0.6701	ENSG00000117475	ENST00000367808	3'UTR	10.4837	32.5342	4.37815	2	1.58316	0	0	0					BLZF1	basic leucine zipper nuclear factor 1 [Source:HGNC Symbol;Acc:1065]	protein_coding
chr1+:169790863-169790900|169792548-169792571	GUGCAAA vertebrate UUUGCAC hsa-miR-19a(7mer-m8) hsa-miR-19b(7mer-m8)	0.532	0.7627	ENSG00000000460	ENST00000286031	CDS	10.4837	12.2003	6.56722	7	0	4.55922	0	0					C1orf112	Uncharacterized protein C1orf112 [Source:UniProtKB/Swiss-Prot;Acc:Q9NSG2]	protein_coding
chr1+:171484950-171484998|171486729-171486732	UCCAUAG no UAUGGA hsa-miR-587(6mer-m8)	0.0189	1	ENSG00000117523	ENST00000392078	CDS	10.4837	8.13354	21.8907	38	4.74948	3.03948	13.4171	25.7094					BAT2D1	HLA-B associated transcript 2-like 2 [Source:HGNC Symbol;Acc:24903]	protein_coding
chr1+:171492457-171492493|171492573-171492591	AGCACCU no AGGUGC hsa-miR-500a*(6mer-m8) GGUGCU hsa-miR-29a(6mer) hsa-miR-29b(6mer) hsa-miR-29c(6mer) ebv-miR-BART1-3p(6mer) kshv-miR-K12-1*(6mer-m8) hsa-miR-3065-3p(6mer-m8) hsa-miR-3663-3p(6mer-m8)	0.0361	1	ENSG00000117523	ENST00000392078	CDS	15.7256	0	10.9454	12	0	0	0	0					BAT2D1	HLA-B associated transcript 2-like 2 [Source:HGNC Symbol;Acc:24903]	protein_coding
chr1+:171494012-171494072	UUAGUGU weakly ACACUA hsa-miR-142-3p(6mer-m8) CACUAA ebv-miR-BART1-5p(6mer-m8)	0.1765	0.5897	ENSG00000117523	ENST00000392078	CDS	20.9675	4.06677	8.7563	9	0	6.07896	0	0					BAT2D1	HLA-B associated transcript 2-like 2 [Source:HGNC Symbol;Acc:24903]	protein_coding
chr1+:171506491-171506539	GGCUCAG vertebrate CUGAGCC hsa-miR-24(7mer-m8)	0.0931	0.9051	ENSG00000117523	ENST00000392078	CDS	5.24187	0	13.1344	2	0	0	0	0					BAT2D1	HLA-B associated transcript 2-like 2 [Source:HGNC Symbol;Acc:24903]	protein_coding
chr1+:171527086-171527138	UGAUGGU no ACCAUCA kshv-miR-K12-6-3p(7mer-A1)	0.4527	0.5241	ENSG00000117523	ENST00000392078	CDS	0	4.06677	2.18907	1	3.16632	3.03948	13.4171	32.1367			x		BAT2D1	HLA-B associated transcript 2-like 2 [Source:HGNC Symbol;Acc:24903]	protein_coding
chr1+:171544243-171544267|171546572-171546625	GUAGUGU vertebrate ACACUAC hsa-miR-142-3p(7mer-m8)	0.2719	0.4263	ENSG00000117523	ENST00000392078	CDS	10.4837	16.2671	13.1344	17	14.2484	16.7172	23.4799	19.282					BAT2D1	HLA-B associated transcript 2-like 2 [Source:HGNC Symbol;Acc:24903]	protein_coding
chr1+:171546591-171546647	UACAAAU no AUUUGU hsa-miR-7-1*(6mer-m8) hsa-miR-7-2*(6mer-m8) UUUGUA hsa-miR-524-5p(6mer) hsa-miR-520d-5p(6mer) hsa-miR-1283(6mer-m8) ebv-miR-BART22(6mer)	0.9959	0.7499	ENSG00000117523	ENST00000392078	CDS	5.24187	8.13354	0	2	55.4106	66.8686	0	0					BAT2D1	HLA-B associated transcript 2-like 2 [Source:HGNC Symbol;Acc:24903]	protein_coding
chr1+:171553564-171553611	AGAAUAA no UAUUCU kshv-miR-K12-4-3p(6mer)	0.121	0.4842	ENSG00000117523	ENST00000392078	CDS	0	0	0	5	0	0	3.35426	6.42735					BAT2D1	HLA-B associated transcript 2-like 2 [Source:HGNC Symbol;Acc:24903]	protein_coding
chr1+:171561099-171561160	GUGUAAA no UUUACA hsa-miR-3607-3p(6mer-m8)	0.1553	0.7852	ENSG00000117523	ENST00000392078	3'UTR	15.7256	12.2003	4.37815	11	1.58316	4.55922	6.70853	9.64102					BAT2D1	HLA-B associated transcript 2-like 2 [Source:HGNC Symbol;Acc:24903]	protein_coding
chr1+:171562190-171562231	UACCUGG weakly CCAGGUA hsa-miR-619(7mer-A1)	0.4388	0.7314	ENSG00000117523	ENST00000392078	3'UTR	0	0	4.37815	7	44.3285	47.112	0	3.21367					BAT2D1	HLA-B associated transcript 2-like 2 [Source:HGNC Symbol;Acc:24903]	protein_coding
chr1+:172579553-172579631	GGAAGUG no CACUUC hsa-miR-573(6mer-m8) hsa-miR-3616-5p(6mer-m8) hsa-miR-3647-5p(6mer-m8)	0.9926	0.8302	ENSG00000094975	ENST00000367723	3'UTR	0	0	0	2	53.8274	27.3553	0	0					C1orf9	Protein osteopotentia homolog Precursor [Source:UniProtKB/Swiss-Prot;Acc:Q9UBS9]	protein_coding
chr1+:172579715-172579772	AAGGUGC vertebrate GCACCUU hsa-miR-18a(7mer-m8) hsa-miR-18b(7mer-m8)	0.9264	0.832	ENSG00000094975	ENST00000367723	3'UTR	10.4837	40.6677	4.37815	7	12.6653	9.11845	0	0					C1orf9	Protein osteopotentia homolog Precursor [Source:UniProtKB/Swiss-Prot;Acc:Q9UBS9]	protein_coding
chr1+:172579840-172579908	AGGCACA no GUGCCU hsa-miR-124(6mer-m8) hsa-miR-506(6mer-m8) hsa-miR-4269(6mer-m8) hsa-miR-3622a-5p(6mer)	0.5314	1	ENSG00000094975	ENST00000367723	3'UTR	15.7256	36.6009	17.5126	13	0	0	0	0					C1orf9	Protein osteopotentia homolog Precursor [Source:UniProtKB/Swiss-Prot;Acc:Q9UBS9]	protein_coding
chr1+:172580182-172580242	UUAGUGU weakly ACACUA hsa-miR-142-3p(6mer-m8) CACUAA ebv-miR-BART1-5p(6mer-m8)	0.9242	0.7605	ENSG00000094975	ENST00000367723	3'UTR	0	4.06677	2.18907	12	0	3.03948	3.35426	6.42735					C1orf9	Protein osteopotentia homolog Precursor [Source:UniProtKB/Swiss-Prot;Acc:Q9UBS9]	protein_coding
chr1+:172580600-172580633	AAAGUGC vertebrate GCACUUU hsa-miR-17(7mer-m8) hsa-miR-20a(7mer-m8) hsa-miR-93(7mer-m8) hsa-miR-106a(7mer-m8) hsa-miR-106b(7mer-m8) hsa-miR-20b(7mer-m8) hsa-miR-526b*(7mer-m8) hsa-miR-519d(7mer-m8)	0.8118	0.9069	ENSG00000094975	ENST00000367723	3'UTR	20.9675	24.4006	45.9706	30	26.9137	19.7566	10.0628	9.64102					C1orf9	Protein osteopotentia homolog Precursor [Source:UniProtKB/Swiss-Prot;Acc:Q9UBS9]	protein_coding
chr1+:172580903-172580963	AAGUGUU no AACACU kshv-miR-K12-10a(6mer) hsa-miR-4255(6mer) hsa-miR-3659(6mer-m8) ACACUU hsa-miR-595(6mer)	0.4177	0.9969	ENSG00000094975	ENST00000367723	3'UTR	57.6606	48.8013	100.697	98	17.4148	18.2369	13.4171	25.7094					C1orf9	Protein osteopotentia homolog Precursor [Source:UniProtKB/Swiss-Prot;Acc:Q9UBS9]	protein_coding
chr1+:173754743-173754810	GAAAUAA no	0.7024	0.9945	ENSG00000076321	ENST00000209884	3'UTR	0	0	15.3235	6	9.49896	12.1579	40.2512	22.4957					KLHL20	kelch-like 20 (Drosophila) [Source:HGNC Symbol;Acc:25056]	protein_coding
chr1+:173755446-173755505	AAAGUGC vertebrate GCACUUU hsa-miR-17(7mer-m8) hsa-miR-20a(7mer-m8) hsa-miR-93(7mer-m8) hsa-miR-106a(7mer-m8) hsa-miR-106b(7mer-m8) hsa-miR-20b(7mer-m8) hsa-miR-526b*(7mer-m8) hsa-miR-519d(7mer-m8)	0.9902	0.9731	ENSG00000076321	ENST00000209884	3'UTR	62.9025	93.5358	183.882	180	389.457	410.33	268.341	289.231					KLHL20	kelch-like 20 (Drosophila) [Source:HGNC Symbol;Acc:25056]	protein_coding
chr1+:173755684-173755737	AAGGUGC vertebrate GCACCUU hsa-miR-18a(7mer-m8) hsa-miR-18b(7mer-m8)	0.8152	0.7564	ENSG00000076321	ENST00000209884	3'UTR	0	16.2671	17.5126	14	18.9979	34.954	0	0					KLHL20	kelch-like 20 (Drosophila) [Source:HGNC Symbol;Acc:25056]	protein_coding
chr1+:173810039-173810088	AAGUGCA weakly UGCACUU hsa-miR-519c-3p(7mer-m8) hsa-miR-519b-3p(7mer-m8) hsa-miR-519a(7mer-m8)	0.861	1	ENSG00000117593	ENST00000361951	CDS	41.935	16.2671	50.3487	56	3.16632	1.51974	10.0628	0					DARS2	aspartyl-tRNA synthetase 2, mitochondrial [Source:HGNC Symbol;Acc:25538]	protein_coding
chr1+:173866171-173866230	UUAGUGU weakly ACACUA hsa-miR-142-3p(6mer-m8) CACUAA ebv-miR-BART1-5p(6mer-m8)	0.6001	0.5345	ENSG00000185278	ENST00000490000	protein_coding	0	0	2.18907	7	202.644	196.047	40.2512	64.2735					ZBTB37	zinc finger and BTB domain containing 37 [Source:HGNC Symbol;Acc:28365]	protein_coding
chr1+:173866439-173866479	AAAGUGC vertebrate GCACUUU hsa-miR-17(7mer-m8) hsa-miR-20a(7mer-m8) hsa-miR-93(7mer-m8) hsa-miR-106a(7mer-m8) hsa-miR-106b(7mer-m8) hsa-miR-20b(7mer-m8) hsa-miR-526b*(7mer-m8) hsa-miR-519d(7mer-m8)	0.974	0.8693	ENSG00000185278	ENST00000490000	protein_coding	0	4.06677	13.1344	3	45.9116	36.4738	3.35426	0					ZBTB37	zinc finger and BTB domain containing 37 [Source:HGNC Symbol;Acc:28365]	protein_coding
chr1+:174200388-174200453	AUUGCCC no GGCAAU hsa-miR-4317(6mer-m8)	0.0315	1	ENSG00000152061	ENST00000251507	CDS	20.9675	32.5342	21.8907	9	23.7474	27.3553	3.35426	3.21367					RABGAP1L	RAB GTPase activating protein 1-like [Source:HGNC Symbol;Acc:24663]	protein_coding
chr1+:174959800-174959836	AGAAUAC no GUAUUCU kshv-miR-K12-4-3p(7mer-m8)	0.9411	0.9997	ENSG00000152061	ENST00000489615	3'UTR	0	0	24.0798	20	0	0	3.35426	12.8547					RABGAP1L	RAB GTPase activating protein 1-like [Source:HGNC Symbol;Acc:24663]	protein_coding
chr1+:174960853-174960906	UAGAGAA weakly UUCUCUA hsa-miR-3123(7mer-A1) hsa-miR-3925(7mer-A1)	0.7026	0.4642	ENSG00000152061	ENST00000489615	3'UTR	5.24187	12.2003	30.647	14	4.74948	0	26.8341	9.64102					RABGAP1L	RAB GTPase activating protein 1-like [Source:HGNC Symbol;Acc:24663]	protein_coding
chr1+:174979737-174979781	ACAUUCA vertebrate UGAAUGU hsa-miR-181a(7mer-m8) hsa-miR-181b(7mer-m8) hsa-miR-181c(7mer-m8) hsa-miR-181d(7mer-m8) hsa-miR-4262(7mer-m8)	0.5425	0.9349	ENSG00000116161	ENST00000367681	3'UTR	0	0	4.37815	9	0	0	0	0					CACYBP	calcyclin binding protein [Source:HGNC Symbol;Acc:30423]	protein_coding
chr1+:174979781-174979805	AUUAUUG no AAUAAU hsa-miR-126*(6mer) hsa-miR-944(6mer-m8)	0.9731	1	ENSG00000116161	ENST00000367681	3'UTR	0	0	4.37815	0	28.4969	42.5528	16.7713	19.282					CACYBP	calcyclin binding protein [Source:HGNC Symbol;Acc:30423]	protein_coding
chr1+:174979781-174979825	UACAAAG weakly CUUUGUA hsa-miR-524-5p(7mer-m8) hsa-miR-520d-5p(7mer-m8) ebv-miR-BART22(7mer-m8)	0.9604	0.7754	ENSG00000116161	ENST00000367681	3'UTR	0	0	0	0	674.426	759.871	0	0					CACYBP	calcyclin binding protein [Source:HGNC Symbol;Acc:30423]	protein_coding
chr1+:178886125-178886183	UUAGUGU weakly ACACUA hsa-miR-142-3p(6mer-m8) CACUAA ebv-miR-BART1-5p(6mer-m8)	0.6117	0.516	ENSG00000116191	ENST00000367635	3'UTR	26.2094	36.6009	13.1344	19	18.9979	21.2764	0	0					RALGPS2	Ral GEF with PH domain and SH3 binding motif 2 [Source:HGNC Symbol;Acc:30279]	protein_coding
chr1+:178888467-178888499	UAGUGCA vertebrate UGCACUA hsa-miR-130a(7mer-A1) hsa-miR-301a(7mer-A1) hsa-miR-130b(7mer-A1) hsa-miR-454(7mer-A1) hsa-miR-301b(7mer-A1) hsa-miR-4295(7mer-A1) hsa-miR-3666(7mer-A1)	0.0931	0.6309	ENSG00000116191	ENST00000367635	3'UTR	10.4837	65.0683	24.0798	17	18.9979	12.1579	0	0					RALGPS2	Ral GEF with PH domain and SH3 binding motif 2 [Source:HGNC Symbol;Acc:30279]	protein_coding
chr1+:179314207-179314211|179316734-179316788	GUGCAAA vertebrate UUUGCAC hsa-miR-19a(7mer-m8) hsa-miR-19b(7mer-m8)	0.3698	0.9288	ENSG00000057252	ENST00000367619	CDS	10.4837	16.2671	2.18907	4	0	0	0	0					SOAT1	sterol O-acyltransferase 1 [Source:HGNC Symbol;Acc:11177]	protein_coding
chr1+:179887227-179887285	UUGUAGG no CCUACAA hsa-miR-135b*(7mer-A1)	0.9679	0.9564	ENSG00000143337	ENST00000398836	CDS	0	0	4.37815	9	28.4969	28.8751	137.525	173.538					TOR1AIP1	torsin A interacting protein 1 [Source:HGNC Symbol;Acc:29456]	protein_coding
chr1+:179888904-179888967	UUACAGU weakly ACUGUAA hsa-miR-582-5p(7mer-A1)	0.8125	0.7688	ENSG00000143337	ENST00000398836	3'UTR	0	0	15.3235	12	7.9158	7.59871	3.35426	16.0684					TOR1AIP1	torsin A interacting protein 1 [Source:HGNC Symbol;Acc:29456]	protein_coding
chr1+:179956377-179956420	AAAGUGC vertebrate GCACUUU hsa-miR-17(7mer-m8) hsa-miR-20a(7mer-m8) hsa-miR-93(7mer-m8) hsa-miR-106a(7mer-m8) hsa-miR-106b(7mer-m8) hsa-miR-20b(7mer-m8) hsa-miR-526b*(7mer-m8) hsa-miR-519d(7mer-m8)	0.9883	0.7641	ENSG00000135837	ENST00000367607	CDS	136.289	146.404	89.7521	108	4.74948	0	0	0					CEP350	centrosomal protein 350kDa [Source:HGNC Symbol;Acc:24238]	protein_coding
chr1+:179983553-179983598	AGUAGCA no GCUACU hsa-miR-562(6mer-m8)	0.9974	0.9964	ENSG00000135837	ENST00000367607	CDS	0	0	0	0	22.1642	36.4738	10.0628	9.64102					CEP350	centrosomal protein 350kDa [Source:HGNC Symbol;Acc:24238]	protein_coding
chr1+:180082020-180082054	GUGCAAA vertebrate UUUGCAC hsa-miR-19a(7mer-m8) hsa-miR-19b(7mer-m8)	0.7935	0.8573	ENSG00000135837	ENST00000367607	3'UTR	0	20.3339	0	6	30.08	27.3553	0	0					CEP350	centrosomal protein 350kDa [Source:HGNC Symbol;Acc:24238]	protein_coding
chr1+:180083410-180083467	AGGUAGU vertebrate ACUACCU hsa-miR-196a(7mer-m8) hsa-miR-196b(7mer-m8)	0.9849	0.8244	ENSG00000135837	ENST00000367607	3'UTR	0	0	0	0	83.9074	75.9871	0	0					CEP350	centrosomal protein 350kDa [Source:HGNC Symbol;Acc:24238]	protein_coding
chr1+:180155194-180155236	UAGUGCA vertebrate UGCACUA hsa-miR-130a(7mer-A1) hsa-miR-301a(7mer-A1) hsa-miR-130b(7mer-A1) hsa-miR-454(7mer-A1) hsa-miR-301b(7mer-A1) hsa-miR-4295(7mer-A1) hsa-miR-3666(7mer-A1)	0.3959	0.5926	ENSG00000116260	ENST00000367602	CDS	20.9675	32.5342	26.2689	18	0	0	0	3.21367					QSOX1	quiescin Q6 sulfhydryl oxidase 1 [Source:HGNC Symbol;Acc:9756]	protein_coding
chr1+:181059271-181059339	GUGCAUU no AAUGCA hsa-miR-20a*(6mer-m8) hsa-miR-33a(6mer) hsa-miR-586(6mer-m8) hsa-miR-33b(6mer) AUGCAC hsa-miR-517b(6mer-m8)	0.4901	1	ENSG00000162783	ENST00000367577	3'UTR	5.24187	4.06677	4.37815	11	12.6653	6.07896	0	0					IER5	immediate early response 5 [Source:HGNC Symbol;Acc:5393]	protein_coding
chr1+:182812561-182812569|182821367-182821422	UGUAGUG vertebrate CACUACA hsa-miR-142-3p(7mer-A1)	0.5328	0.6437	ENSG00000135829	ENST00000367549	CDS	10.4837	44.7345	63.4832	44	34.8295	31.9146	43.6054	28.9231					DHX9	DEAH (Asp-Glu-Ala-His) box polypeptide 9 [Source:HGNC Symbol;Acc:2750]	protein_coding
chr1+:182849723-182849743|182850398-182850460	AGCAGCA vertebrate UGCUGCU hsa-miR-15a(7mer-m8) hsa-miR-16(7mer-m8) hsa-miR-15b(7mer-m8) hsa-miR-195(7mer-m8) hsa-miR-424(7mer-m8) hsa-miR-497(7mer-m8)	0.776	0.7915	ENSG00000135829	ENST00000367549	CDS	68.1443	69.1351	50.3487	14	6.33264	1.51974	3.35426	3.21367					DHX9	DEAH (Asp-Glu-Ala-His) box polypeptide 9 [Source:HGNC Symbol;Acc:2750]	protein_coding
chr1+:183112319-183112375	GGCCAUC weakly AUGGCC hsa-miR-15a*(6mer-m8) hsa-miR-3187(6mer-m8)	0.7254	0.997	ENSG00000135862	ENST00000258341	3'UTR	15.7256	32.5342	13.1344	3	7.9158	3.03948	3.35426	3.21367					LAMC1	laminin, gamma 1 (formerly LAMB2) [Source:HGNC Symbol;Acc:6492]	protein_coding
chr1+:183113298-183113362	UAGUGUU weakly AACACUA kshv-miR-K12-10a(7mer-A1) hsa-miR-4255(7mer-A1)	0.373	0.8519	ENSG00000135862	ENST00000258341	3'UTR	0	0	15.3235	9	1.58316	4.55922	0	0					LAMC1	laminin, gamma 1 (formerly LAMB2) [Source:HGNC Symbol;Acc:6492]	protein_coding
chr1+:183113501-183113553	AAAGUGA weakly UCACUUU hsa-miR-3609(7mer-m8)	0.0371	0.8343	ENSG00000135862	ENST00000258341	3'UTR	0	0	4.37815	2	0	0	0	0					LAMC1	laminin, gamma 1 (formerly LAMB2) [Source:HGNC Symbol;Acc:6492]	protein_coding
chr1+:183114477-183114540	UAUAAUA mammals UAUUAUA hsa-miR-369-3p(7mer-A1) hsa-miR-374a(7mer-m8) hsa-miR-374b(7mer-m8)	0.8105	0.9675	ENSG00000135862	ENST00000258341	3'UTR	0	0	13.1344	14	0	0	0	0		x			LAMC1	laminin, gamma 1 (formerly LAMB2) [Source:HGNC Symbol;Acc:6492]	protein_coding
chr1+:183498068-183498118	GUAGUAG no CUACUA hsa-miR-325(6mer-m8)	0.7202	0.7752	ENSG00000116698	ENST00000367537	CDS	26.2094	0	10.9454	9	25.3305	22.7961	0	6.42735					SMG7	Smg-7 homolog, nonsense mediated mRNA decay factor (C. elegans) [Source:HGNC Symbol;Acc:16792]	protein_coding
chr1+:183498115-183498177|183498532-183498545	AAAGUGC vertebrate GCACUUU hsa-miR-17(7mer-m8) hsa-miR-20a(7mer-m8) hsa-miR-93(7mer-m8) hsa-miR-106a(7mer-m8) hsa-miR-106b(7mer-m8) hsa-miR-20b(7mer-m8) hsa-miR-526b*(7mer-m8) hsa-miR-519d(7mer-m8)	0.5611	0.9999	ENSG00000116698	ENST00000367537	CDS	0	16.2671	13.1344	7	3.16632	7.59871	0	0					SMG7	Smg-7 homolog, nonsense mediated mRNA decay factor (C. elegans) [Source:HGNC Symbol;Acc:16792]	protein_coding
chr1+:183515163-183515220	GAAGGUA no UACCUU hsa-miR-548m(6mer-m8) ACCUUC hsa-miR-493(6mer)	0.9469	0.8682	ENSG00000116698	ENST00000367537	CDS	0	0	10.9454	0	22.1642	10.6382	60.3768	32.1367					SMG7	Smg-7 homolog, nonsense mediated mRNA decay factor (C. elegans) [Source:HGNC Symbol;Acc:16792]	protein_coding
chr1+:183895757-183895799	GUGCAAA vertebrate UUUGCAC hsa-miR-19a(7mer-m8) hsa-miR-19b(7mer-m8)	0.9942	0.9273	ENSG00000143344	ENST00000304685	3'UTR	0	0	0	1	128.236	132.217	10.0628	3.21367					RGL1	ral guanine nucleotide dissociation stimulator-like 1 [Source:HGNC Symbol;Acc:30281]	protein_coding
chr1+:183896220-183896260	UGUGCAA vertebrate UUGCACA hsa-miR-19a(7mer-A1) hsa-miR-19b(7mer-A1)	0.5272	0.8777	ENSG00000143344	ENST00000304685	3'UTR	0	0	2.18907	0	55.4106	63.8291	6.70853	9.64102					RGL1	ral guanine nucleotide dissociation stimulator-like 1 [Source:HGNC Symbol;Acc:30281]	protein_coding
chr1+:183896399-183896446	AUUGCAC vertebrate GUGCAAU hsa-miR-25(7mer-m8) hsa-miR-32(7mer-m8) hsa-miR-92a(7mer-m8) hsa-miR-363(7mer-m8) hsa-miR-367(7mer-m8) hsa-miR-92b(7mer-m8)	0.2654	0.9999	ENSG00000143344	ENST00000304685	3'UTR	0	0	0	2	278.636	247.718	97.2737	122.12					RGL1	ral guanine nucleotide dissociation stimulator-like 1 [Source:HGNC Symbol;Acc:30281]	protein_coding
chr1+:183896545-183896595	UAAUGCU vertebrate AGCAUUA hsa-miR-155(7mer-m8) kshv-miR-K12-11(7mer-m8)	0.9831	0.9078	ENSG00000143344	ENST00000304685	3'UTR	0	0	13.1344	8	338.796	392.093	684.27	729.504					RGL1	ral guanine nucleotide dissociation stimulator-like 1 [Source:HGNC Symbol;Acc:30281]	protein_coding
chr1+:183896734-183896781	UGAUGGU no ACCAUCA kshv-miR-K12-6-3p(7mer-A1)	0.1073	1	ENSG00000143344	ENST00000304685	3'UTR	0	0	0	0	17.4148	22.7961	73.7938	51.4188			x		RGL1	ral guanine nucleotide dissociation stimulator-like 1 [Source:HGNC Symbol;Acc:30281]	protein_coding
chr1+:183897487-183897516	UAAAGUG vertebrate CACUUUA hsa-miR-17(7mer-A1) hsa-miR-20a(7mer-A1) hsa-miR-93(7mer-A1) hsa-miR-106a(7mer-A1) hsa-miR-106b(7mer-A1) hsa-miR-20b(7mer-A1) hsa-miR-526b*(7mer-A1) hsa-miR-519d(7mer-A1) hsa-miR-3609(7mer-A1)	0.9162	0.8284	ENSG00000143344	ENST00000304685	3'UTR	0	0	0	0	102.905	97.2634	13.4171	6.42735					RGL1	ral guanine nucleotide dissociation stimulator-like 1 [Source:HGNC Symbol;Acc:30281]	protein_coding
chr1+:184091031-184091056	UUAGUGU weakly ACACUA hsa-miR-142-3p(6mer-m8) CACUAA ebv-miR-BART1-5p(6mer-m8)	0.8291	0.9607	TCONS_00001218	TCONS_00001218	lincRNA	36.6931	24.4006	10.9454	6	0	0	0	0					NA	NA	NA
chr1+:184588891-184588950	AGCAGCA vertebrate UGCUGCU hsa-miR-15a(7mer-m8) hsa-miR-16(7mer-m8) hsa-miR-15b(7mer-m8) hsa-miR-195(7mer-m8) hsa-miR-424(7mer-m8) hsa-miR-497(7mer-m8)	0.9607	0.9686	ENSG00000116667	ENST00000235307	3'UTR	0	0	19.7017	19	107.655	101.823	13.4171	22.4957		x			C1orf21	Uncharacterized protein C1orf21 (Cell proliferation-inducing gene 13 protein) [Source:UniProtKB/Swiss-Prot;Acc:Q9H246]	protein_coding
chr1+:185070212-185070275	UCACAUA no AUGUGA hsa-miR-23a(6mer) hsa-miR-23b(6mer) hsa-miR-130a*(6mer) hsa-miR-23c(6mer)	0.3062	0.4511	ENSG00000121481	ENST00000367510	3'UTR	0	8.13354	13.1344	22	0	0	0	0					RNF2	ring finger protein 2 [Source:HGNC Symbol;Acc:10061]	protein_coding
chr1+:186159896-186159949	AGAAUAC no GUAUUCU kshv-miR-K12-4-3p(7mer-m8)	0.9194	0.8942	ENSG00000143341	ENST00000271588	3'UTR	0	0	28.458	15	0	0	3.35426	6.42735					HMCN1	hemicentin 1 [Source:HGNC Symbol;Acc:19194]	protein_coding
chr1+:192548981-192549052	AGCACCA vertebrate UGGUGCU hsa-miR-29a(7mer-m8) hsa-miR-29b(7mer-m8) hsa-miR-29c(7mer-m8)	0.8542	0.9182	ENSG00000090104	ENST00000498352	protein_coding	73.3862	174.871	0	6	417.954	463.521	10.0628	19.282					RGS1	regulator of G-protein signaling 1 [Source:HGNC Symbol;Acc:9991]	protein_coding
chr1+:192549079-192549126	AAAUGCA no GCAUUU hsa-miR-105(6mer-m8) ebv-miR-BART14(6mer)	0.956	0.9766	ENSG00000090104	ENST00000367459	3'UTR	0	0	0	0	227.975	300.909	0	0					RGS1	regulator of G-protein signaling 1 [Source:HGNC Symbol;Acc:9991]	protein_coding
chr1+:193054255-193054306	UAGUGCA vertebrate UGCACUA hsa-miR-130a(7mer-A1) hsa-miR-301a(7mer-A1) hsa-miR-130b(7mer-A1) hsa-miR-454(7mer-A1) hsa-miR-301b(7mer-A1) hsa-miR-4295(7mer-A1) hsa-miR-3666(7mer-A1)	0.2266	0.9822	ENSG00000116747	ENST00000432079	protein_coding	47.1769	69.1351	56.9159	100	7.9158	1.51974	0	3.21367					TROVE2	TROVE domain family, member 2 [Source:HGNC Symbol;Acc:11313]	protein_coding
chr1+:193054283-193054324	UCACAGU vertebrate ACUGUGA hsa-miR-27a(7mer-m8) hsa-miR-27b(7mer-m8) hsa-miR-128(7mer-A1) hsa-miR-3681*(7mer-A1)	0.7928	0.9682	ENSG00000116747	ENST00000432079	protein_coding	0	12.2003	15.3235	3	1.58316	1.51974	0	0					TROVE2	TROVE domain family, member 2 [Source:HGNC Symbol;Acc:11313]	protein_coding
chr1+:193054520-193054574	AUAGAAU no	0.6777	0.6662	ENSG00000116747	ENST00000432079	protein_coding	0	0	91.9411	72	0	3.03948	0	0					TROVE2	TROVE domain family, member 2 [Source:HGNC Symbol;Acc:11313]	protein_coding
chr1+:193054588-193054641	CACACCC no GGUGUG hsa-miR-362-3p(6mer-m8) hsa-miR-329(6mer-m8) hsa-miR-1228(6mer)	0.3694	0.9607	ENSG00000116747	ENST00000432079	protein_coding	0	0	19.7017	23	4.74948	12.1579	0	0					TROVE2	TROVE domain family, member 2 [Source:HGNC Symbol;Acc:11313]	protein_coding
chr1+:193054696-193054775	GGGGGAG weakly CUCCCCC kshv-miR-K12-12(7mer-m8)	0.7475	0.9968	ENSG00000116747	ENST00000432079	protein_coding	0	4.06677	32.8361	33	0	0	3.35426	0				x	TROVE2	TROVE domain family, member 2 [Source:HGNC Symbol;Acc:11313]	protein_coding
chr1+:193055008-193055079	UAGUGUA weakly UACACUA hsa-miR-4280(7mer-A1)	0.9841	0.8049	ENSG00000116747	ENST00000432079	protein_coding	62.9025	77.2687	753.042	560	1160.46	1212.75	1663.72	1629.33					TROVE2	TROVE domain family, member 2 [Source:HGNC Symbol;Acc:11313]	protein_coding
chr1+:193055401-193055474	ACCAGCA weakly UGCUGGU hsa-miR-634(7mer-m8)	0.5287	0.9996	ENSG00000116747	ENST00000432079	protein_coding	0	0	39.4033	21	11.0821	3.03948	0	0					TROVE2	TROVE domain family, member 2 [Source:HGNC Symbol;Acc:11313]	protein_coding
chr1+:193056350-193056386	GAGGUAA no UACCUC hsa-let-7a(6mer) hsa-let-7b(6mer) hsa-let-7c(6mer) hsa-let-7d(6mer) hsa-let-7e(6mer) hsa-let-7f(6mer) hsa-miR-98(6mer) hsa-let-7g(6mer) hsa-let-7i(6mer) hsa-miR-202(6mer)	0.8121	0.9495	ENSG00000116747	ENST00000432079	protein_coding	31.4512	16.2671	13.1344	14	159.899	150.454	23.4799	16.0684					TROVE2	TROVE domain family, member 2 [Source:HGNC Symbol;Acc:11313]	protein_coding
chr1+:193059249-193059291	AAAGUGC vertebrate GCACUUU hsa-miR-17(7mer-m8) hsa-miR-20a(7mer-m8) hsa-miR-93(7mer-m8) hsa-miR-106a(7mer-m8) hsa-miR-106b(7mer-m8) hsa-miR-20b(7mer-m8) hsa-miR-526b*(7mer-m8) hsa-miR-519d(7mer-m8)	0.9415	0.7588	ENSG00000116747	ENST00000432079	protein_coding	52.4187	61.0016	80.9958	64	56.9937	60.7896	3.35426	9.64102					TROVE2	TROVE domain family, member 2 [Source:HGNC Symbol;Acc:11313]	protein_coding
chr1+:193094267-193094345	AAGGUGC vertebrate GCACCUU hsa-miR-18a(7mer-m8) hsa-miR-18b(7mer-m8)	0.2814	0.8114	ENSG00000134371	ENST00000367435	CDS	0	0	0	2	61.7432	42.5528	0	3.21367					CDC73	cell division cycle 73, Paf1/RNA polymerase II complex component, homolog (S. cerevisiae) [Source:HGNC Symbol;Acc:16783]	protein_coding
chr1+:193111005-193111041	UGCAGCA vertebrate UGCUGCA hsa-miR-103(7mer-A1) hsa-miR-107(7mer-A1)	0.6317	0.9149	ENSG00000134371	ENST00000367435	CDS	0	0	0	1	20.5811	18.2369	0	0					CDC73	cell division cycle 73, Paf1/RNA polymerase II complex component, homolog (S. cerevisiae) [Source:HGNC Symbol;Acc:16783]	protein_coding
chr1+:193121509-193121567	AUAGUGU no ACACUA hsa-miR-142-3p(6mer-m8)	0.7087	0.9565	ENSG00000134371	ENST00000367435	CDS	47.1769	16.2671	100.697	116	94.9896	104.862	70.4396	54.6324					CDC73	cell division cycle 73, Paf1/RNA polymerase II complex component, homolog (S. cerevisiae) [Source:HGNC Symbol;Acc:16783]	protein_coding
chr1+:193219970-193220004	UUUGCUU no	0.8267	1	ENSG00000134371	ENST00000367435	3'UTR	0	0	0	0	58.5769	60.7896	0	0					CDC73	cell division cycle 73, Paf1/RNA polymerase II complex component, homolog (S. cerevisiae) [Source:HGNC Symbol;Acc:16783]	protein_coding
chr1+:193220070-193220129	UAAUGCU vertebrate AGCAUUA hsa-miR-155(7mer-m8) kshv-miR-K12-11(7mer-m8)	0.7656	0.9913	ENSG00000134371	ENST00000367435	3'UTR	0	0	8.7563	5	109.238	136.777	117.399	141.402					CDC73	cell division cycle 73, Paf1/RNA polymerase II complex component, homolog (S. cerevisiae) [Source:HGNC Symbol;Acc:16783]	protein_coding
chr1+:193220304-193220355	NA	0	0	ENSG00000134371	ENST00000367435	3'UTR	0	0	0	1	0	0	3.35426	6.42735					CDC73	cell division cycle 73, Paf1/RNA polymerase II complex component, homolog (S. cerevisiae) [Source:HGNC Symbol;Acc:16783]	protein_coding
chr1+:193220631-193220684	ACAAUCA no	0.7469	0.9534	ENSG00000134371	ENST00000367435	3'UTR	5.24187	4.06677	8.7563	26	20.5811	16.7172	3.35426	0					CDC73	cell division cycle 73, Paf1/RNA polymerase II complex component, homolog (S. cerevisiae) [Source:HGNC Symbol;Acc:16783]	protein_coding
chr1+:193221403-193221437	GUAAACA vertebrate UGUUUAC hsa-miR-30a(7mer-m8) hsa-miR-30c(7mer-m8) hsa-miR-30d(7mer-m8) hsa-miR-30b(7mer-m8) hsa-miR-30e(7mer-m8)	0.9812	0.9964	ENSG00000134371	ENST00000367435	3'UTR	0	0	0	3	26.9137	41.033	40.2512	35.3504					CDC73	cell division cycle 73, Paf1/RNA polymerase II complex component, homolog (S. cerevisiae) [Source:HGNC Symbol;Acc:16783]	protein_coding
chr1+:193221720-193221783	GAUGGUU no AACCAUC kshv-miR-K12-6-3p(7mer-m8)	0.9821	0.5827	ENSG00000134371	ENST00000367435	3'UTR	0	0	89.7521	101	9.49896	15.1974	13.4171	16.0684					CDC73	cell division cycle 73, Paf1/RNA polymerase II complex component, homolog (S. cerevisiae) [Source:HGNC Symbol;Acc:16783]	protein_coding
chr1+:193222130-193222170	UCAAGUU no AACUUGA ebv-miR-BART18-5p(7mer-A1)	0.959	0.8081	ENSG00000134371	ENST00000367435	3'UTR	0	0	2.18907	0	33.2463	60.7896	30.1884	28.9231					CDC73	cell division cycle 73, Paf1/RNA polymerase II complex component, homolog (S. cerevisiae) [Source:HGNC Symbol;Acc:16783]	protein_coding
chr1+:193222598-193222626	AUUUGUC no	0.9976	0.9999	ENSG00000134371	ENST00000367435	3'UTR	0	0	0	0	110.821	74.4673	0	0					CDC73	cell division cycle 73, Paf1/RNA polymerase II complex component, homolog (S. cerevisiae) [Source:HGNC Symbol;Acc:16783]	protein_coding
chr1+:198231753-198231767|198233254-198233288	GAUGGUU no AACCAUC kshv-miR-K12-6-3p(7mer-m8)	0.8899	1	ENSG00000151414	ENST00000367385	CDS	0	0	8.7563	18	14.2484	9.11845	43.6054	22.4957					NEK7	NIMA (never in mitosis gene a)-related kinase 7 [Source:HGNC Symbol;Acc:13386]	protein_coding
chr1+:198289478-198289512	UAUAAAG mammals CUUUAUA hsa-miR-142-5p(7mer-A1) hsa-miR-340(7mer-m8)	0.1112	0.7107	ENSG00000151414	ENST00000367385	3'UTR	0	0	0	1	17.4148	18.2369	0	3.21367					NEK7	NIMA (never in mitosis gene a)-related kinase 7 [Source:HGNC Symbol;Acc:13386]	protein_coding
chr1+:198289512-198289568	UAGUGUA weakly UACACUA hsa-miR-4280(7mer-A1)	0.515	0.7546	ENSG00000151414	ENST00000367385	3'UTR	20.9675	12.2003	43.7815	61	50.6611	42.5528	13.4171	16.0684					NEK7	NIMA (never in mitosis gene a)-related kinase 7 [Source:HGNC Symbol;Acc:13386]	protein_coding
chr1+:198290444-198290514	AUGGAUG no CAUCCA hsa-miR-432*(6mer) hsa-miR-3691(6mer-m8) AUCCAU hsa-miR-490-5p(6mer-m8) hsa-miR-1246(6mer) hsa-miR-3134(6mer-m8)	0.323	0.7583	ENSG00000151414	ENST00000367385	3'UTR	10.4837	8.13354	17.5126	12	23.7474	24.3159	20.1256	28.9231					NEK7	NIMA (never in mitosis gene a)-related kinase 7 [Source:HGNC Symbol;Acc:13386]	protein_coding
chr1+:198291251-198291312	AUCAUAG no CUAUGAU ebv-miR-BART7(7mer-m8)	0.6037	0.9963	ENSG00000151414	ENST00000367385	3'UTR	0	0	0	0	14.2484	16.7172	0	0					NEK7	NIMA (never in mitosis gene a)-related kinase 7 [Source:HGNC Symbol;Acc:13386]	protein_coding
chr1+:198291291-198291355	NA	0	0	ENSG00000151414	ENST00000367385	3'UTR	5.24187	0	0	1	12.6653	18.2369	10.0628	6.42735					NEK7	NIMA (never in mitosis gene a)-related kinase 7 [Source:HGNC Symbol;Acc:13386]	protein_coding
chr1+:198291348-198291408	AAGUAUG no AUACUU hsa-miR-548l(6mer-m8)	0.9946	0.8368	ENSG00000151414	ENST00000367385	3'UTR	10.4837	4.06677	10.9454	31	560.438	536.469	60.3768	25.7094					NEK7	NIMA (never in mitosis gene a)-related kinase 7 [Source:HGNC Symbol;Acc:13386]	protein_coding
chr1+:198291372-198291426	UACAGUA vertebrate UACUGUA hsa-miR-101(7mer-A1) hsa-miR-144(7mer-A1)	0.9229	0.7147	ENSG00000151414	ENST00000367385	3'UTR	0	0	35.0252	18	36.4127	33.4343	3.35426	0					NEK7	NIMA (never in mitosis gene a)-related kinase 7 [Source:HGNC Symbol;Acc:13386]	protein_coding
chr1+:19934806-19934844	AGCAGCA vertebrate UGCUGCU hsa-miR-15a(7mer-m8) hsa-miR-16(7mer-m8) hsa-miR-15b(7mer-m8) hsa-miR-195(7mer-m8) hsa-miR-424(7mer-m8) hsa-miR-497(7mer-m8)	0.8917	0.9487	ENSG00000226396	ENST00000457263	pseudogene	20.9675	40.6677	8.7563	8	0	0	0	0					RP5-1056L3.3		pseudogene
chr1+:200818748-200818799	NA	0	0	ENSG00000118200	ENST00000236925	CDS	0	0	4.37815	4	7.9158	15.1974	26.8341	22.4957					CAMSAP1L1	calmodulin regulated spectrin-associated protein 1-like 1 [Source:HGNC Symbol;Acc:29188]	protein_coding
chr1+:200827036-200827067	UCCUGUC weakly GACAGG hsa-miR-214*(6mer-m8) hsa-miR-339-5p(6mer-m8)	0.9872	1	ENSG00000118200	ENST00000236925	CDS	0	0	2.18907	2	109.238	117.02	6.70853	3.21367					CAMSAP1L1	calmodulin regulated spectrin-associated protein 1-like 1 [Source:HGNC Symbol;Acc:29188]	protein_coding
chr1+:200827198-200827252	GUGCAAA vertebrate UUUGCAC hsa-miR-19a(7mer-m8) hsa-miR-19b(7mer-m8)	0.0486	0.5837	ENSG00000118200	ENST00000236925	3'UTR	0	0	13.1344	19	58.5769	66.8686	0	3.21367					CAMSAP1L1	calmodulin regulated spectrin-associated protein 1-like 1 [Source:HGNC Symbol;Acc:29188]	protein_coding
chr1+:200827229-200827259	UAGGCAG weakly CUGCCUA hsa-miR-34b*(7mer-A1) hsa-miR-449c(7mer-A1) hsa-miR-940(7mer-A1)	0.9871	0.9946	ENSG00000118200	ENST00000236925	3'UTR	0	0	0	6	39.579	22.7961	0	0					CAMSAP1L1	calmodulin regulated spectrin-associated protein 1-like 1 [Source:HGNC Symbol;Acc:29188]	protein_coding
chr1+:200827757-200827806	AGCAGAA no UUCUGC hsa-miR-298(6mer) UCUGCU hsa-miR-922(6mer-m8)	0.7802	0.994	ENSG00000118200	ENST00000236925	3'UTR	0	0	4.37815	2	121.903	129.178	16.7713	12.8547					CAMSAP1L1	calmodulin regulated spectrin-associated protein 1-like 1 [Source:HGNC Symbol;Acc:29188]	protein_coding
chr1+:200827769-200827843	UAAUACU vertebrate AGUAUUA hsa-miR-200b(7mer-A1) hsa-miR-200c(7mer-A1) hsa-miR-429(7mer-A1)	0.0681	0.8872	ENSG00000118200	ENST00000236925	3'UTR	0	0	0	3	9.49896	1.51974	20.1256	6.42735					CAMSAP1L1	calmodulin regulated spectrin-associated protein 1-like 1 [Source:HGNC Symbol;Acc:29188]	protein_coding
chr1+:200827908-200827967	AGAAGUG no CACUUC hsa-miR-573(6mer-m8) hsa-miR-3616-5p(6mer-m8) hsa-miR-3647-5p(6mer-m8)	0.3969	0.9933	ENSG00000118200	ENST00000236925	3'UTR	0	0	10.9454	19	4.74948	3.03948	0	0					CAMSAP1L1	calmodulin regulated spectrin-associated protein 1-like 1 [Source:HGNC Symbol;Acc:29188]	protein_coding
chr1+:200828317-200828377	UCCUGAG weakly CUCAGGA hsa-miR-1200(7mer-m8) hsa-miR-544b(7mer-A1) hsa-miR-4324(7mer-A1)	0.9882	0.9937	ENSG00000118200	ENST00000236925	3'UTR	0	0	2.18907	8	94.9896	77.5068	0	0					CAMSAP1L1	calmodulin regulated spectrin-associated protein 1-like 1 [Source:HGNC Symbol;Acc:29188]	protein_coding
chr1+:200828583-200828628	UAUAAUA mammals UAUUAUA hsa-miR-369-3p(7mer-A1) hsa-miR-374a(7mer-m8) hsa-miR-374b(7mer-m8)	0.8486	1	ENSG00000118200	ENST00000236925	3'UTR	0	0	0	2	26.9137	16.7172	0	0					CAMSAP1L1	calmodulin regulated spectrin-associated protein 1-like 1 [Source:HGNC Symbol;Acc:29188]	protein_coding
chr1+:200828587-200828640	GAUGCAC no GUGCAU hsa-miR-501-3p(6mer) hsa-miR-502-3p(6mer)	0.9346	1	ENSG00000118200	ENST00000236925	3'UTR	0	0	0	3	17.4148	42.5528	0	0					CAMSAP1L1	calmodulin regulated spectrin-associated protein 1-like 1 [Source:HGNC Symbol;Acc:29188]	protein_coding
chr1+:200828642-200828689	UACAGUA vertebrate UACUGUA hsa-miR-101(7mer-A1) hsa-miR-144(7mer-A1)	0.9696	0.8546	ENSG00000118200	ENST00000236925	3'UTR	0	0	2.18907	4	58.5769	62.3094	13.4171	6.42735					CAMSAP1L1	calmodulin regulated spectrin-associated protein 1-like 1 [Source:HGNC Symbol;Acc:29188]	protein_coding
chr1+:200829331-200829367	UGCACCA weakly UGGUGCA ebv-miR-BART3(7mer-A1) hsa-miR-767-5p(7mer-A1)	0.9123	0.991	ENSG00000118200	ENST00000236925	3'UTR	0	0	2.18907	9	37.9958	36.4738	0	0					CAMSAP1L1	calmodulin regulated spectrin-associated protein 1-like 1 [Source:HGNC Symbol;Acc:29188]	protein_coding
chr1+:200829416-200829463	UGUGUUU no AAACAC hsa-miR-3676(6mer-m8)	0.3407	0.559	ENSG00000118200	ENST00000236925	3'UTR	0	0	4.37815	6	26.9137	27.3553	6.70853	9.64102					CAMSAP1L1	calmodulin regulated spectrin-associated protein 1-like 1 [Source:HGNC Symbol;Acc:29188]	protein_coding
chr1+:201825020-201825044	UACAGGA weakly CCUGUA kshv-miR-K12-1(6mer-m8)	0.8029	1	ENSG00000198700	ENST00000361565	CDS	0	0	2.18907	5	30.08	41.033	3.35426	3.21367					IPO9	importin 9 [Source:HGNC Symbol;Acc:19425]	protein_coding
chr1+:201836040-201836087	UACUGUA weakly UACAGUA kshv-miR-K12-2(7mer-A1) hsa-miR-1183(7mer-A1)	0.0027	0.4436	ENSG00000198700	ENST00000361565	CDS	0	0	15.3235	5	0	1.51974	0	0					IPO9	importin 9 [Source:HGNC Symbol;Acc:19425]	protein_coding
chr1+:201845524-201845584	AGAAUAU no UAUUCU kshv-miR-K12-4-3p(6mer)	0.9395	0.8727	ENSG00000198700	ENST00000361565	3'UTR	5.24187	0	6.56722	9	33.2463	34.954	90.5652	44.9914					IPO9	importin 9 [Source:HGNC Symbol;Acc:19425]	protein_coding
chr1+:201845609-201845678	AGCAGCA vertebrate UGCUGCU hsa-miR-15a(7mer-m8) hsa-miR-16(7mer-m8) hsa-miR-15b(7mer-m8) hsa-miR-195(7mer-m8) hsa-miR-424(7mer-m8) hsa-miR-497(7mer-m8)	0.1771	0.9992	ENSG00000198700	ENST00000361565	3'UTR	0	0	8.7563	12	0	0	0	0					IPO9	importin 9 [Source:HGNC Symbol;Acc:19425]	protein_coding
chr1+:201845693-201845762	UUAGUGU weakly ACACUA hsa-miR-142-3p(6mer-m8) CACUAA ebv-miR-BART1-5p(6mer-m8)	0.6712	0.8118	ENSG00000198700	ENST00000361565	3'UTR	26.2094	24.4006	126.966	90	60.1601	42.5528	120.754	118.906					IPO9	importin 9 [Source:HGNC Symbol;Acc:19425]	protein_coding
chr1+:201938804-201938837	AAAGUGC vertebrate GCACUUU hsa-miR-17(7mer-m8) hsa-miR-20a(7mer-m8) hsa-miR-93(7mer-m8) hsa-miR-106a(7mer-m8) hsa-miR-106b(7mer-m8) hsa-miR-20b(7mer-m8) hsa-miR-526b*(7mer-m8) hsa-miR-519d(7mer-m8)	0.2492	0.8175	ENSG00000134375	ENST00000482943	protein_coding	10.4837	12.2003	0	2	4.74948	3.03948	0	6.42735	x				TIMM17A	translocase of inner mitochondrial membrane 17 homolog A (yeast) [Source:HGNC Symbol;Acc:17315]	protein_coding
chr1+:201939004-201939052	ACCAGGC no GCCUGGU kshv-miR-K12-12*(7mer-m8) hsa-miR-1911*(7mer-m8)	0.5524	0.9985	ENSG00000134375	ENST00000482943	protein_coding	0	0	30.647	17	3.16632	1.51974	13.4171	12.8547					TIMM17A	translocase of inner mitochondrial membrane 17 homolog A (yeast) [Source:HGNC Symbol;Acc:17315]	protein_coding
chr1+:201939345-201939403	UGGGUAU no AUACCCA kshv-miR-K12-9(7mer-m8)	0.6938	1	ENSG00000134375	ENST00000482943	protein_coding	0	0	52.5378	38	37.9958	33.4343	0	0					TIMM17A	translocase of inner mitochondrial membrane 17 homolog A (yeast) [Source:HGNC Symbol;Acc:17315]	protein_coding
chr1+:201969045-201969121	UCCAGUG vertebrate CACUGGA hsa-miR-199a-5p(7mer-A1) hsa-miR-199b-5p(7mer-A1) hsa-miR-1825(7mer-A1)	0.0005	1	ENSG00000176393	ENST00000295640	CDS	0	0	10.9454	33	3.16632	3.03948	13.4171	12.8547					RNPEP	arginyl aminopeptidase (aminopeptidase B) [Source:HGNC Symbol;Acc:10078]	protein_coding
chr1+:202549822-202549862	AAAGUGC vertebrate GCACUUU hsa-miR-17(7mer-m8) hsa-miR-20a(7mer-m8) hsa-miR-93(7mer-m8) hsa-miR-106a(7mer-m8) hsa-miR-106b(7mer-m8) hsa-miR-20b(7mer-m8) hsa-miR-526b*(7mer-m8) hsa-miR-519d(7mer-m8)	0.9578	0.7712	ENSG00000077157	ENST00000367270	3'UTR	0	4.06677	4.37815	10	7.9158	0	63.731	109.265					PPP1R12B	protein phosphatase 1, regulatory (inhibitor) subunit 12B [Source:HGNC Symbol;Acc:7619]	protein_coding
chr1+:203274668-203274721	GGGUGGG no CCCACC hsa-miR-92a-2*(6mer) hsa-miR-654-5p(6mer) hsa-miR-541(6mer) CCACCC hsa-miR-363*(6mer) hsa-miR-608(6mer-m8) hsa-miR-1293(6mer)	0.0776	1	ENSG00000159388	ENST00000290551	5'UTR	10.4837	16.2671	0	0	0	0	0	0					BTG2	BTG family, member 2 [Source:HGNC Symbol;Acc:1131]	protein_coding
chr1+:203276251-203276325	AAUGCAG no	0.0035	1	ENSG00000159388	ENST00000290551	CDS	10.4837	12.2003	0	0	44.3285	50.1515	0	0					BTG2	BTG family, member 2 [Source:HGNC Symbol;Acc:1131]	protein_coding
chr1+:203277040-203277130	UAGAAAA no	0.1653	0.9595	ENSG00000159388	ENST00000290551	3'UTR	5.24187	0	2.18907	1	0	0	0	0					BTG2	BTG family, member 2 [Source:HGNC Symbol;Acc:1131]	protein_coding
chr1+:203277115-203277167	AGCAGCU weakly AGCUGCU hsa-miR-646(7mer-m8)	0.3194	0.7348	ENSG00000159388	ENST00000290551	3'UTR	10.4837	20.3339	2.18907	2	42.7453	36.4738	0	0					BTG2	BTG family, member 2 [Source:HGNC Symbol;Acc:1131]	protein_coding
chr1+:203277159-203277201	GAGGGUA no	0.6517	0.9267	ENSG00000159388	ENST00000290551	3'UTR	10.4837	8.13354	0	0	3.16632	6.07896	3.35426	0					BTG2	BTG family, member 2 [Source:HGNC Symbol;Acc:1131]	protein_coding
chr1+:203277257-203277330	UGUGCAG weakly CUGCACA hsa-miR-143*(7mer-A1)	0.4542	0.8025	ENSG00000159388	ENST00000290551	3'UTR	78.6281	20.3339	2.18907	5	14.2484	9.11845	0	0					BTG2	BTG family, member 2 [Source:HGNC Symbol;Acc:1131]	protein_coding
chr1+:203277311-203277360	AAAUUAU no AUAAUU hsa-miR-944(6mer)	0.1941	0.9527	ENSG00000159388	ENST00000290551	3'UTR	0	12.2003	0	0	14.2484	3.03948	0	0					BTG2	BTG family, member 2 [Source:HGNC Symbol;Acc:1131]	protein_coding
chr1+:203277343-203277405	UACUCUU no	0.6651	0.9961	ENSG00000159388	ENST00000290551	3'UTR	20.9675	20.3339	0	3	6.33264	0	0	0					BTG2	BTG family, member 2 [Source:HGNC Symbol;Acc:1131]	protein_coding
chr1+:203277399-203277448	UGUGGUU weakly AACCAC hsa-miR-140-5p(6mer-m8) hsa-miR-876-3p(6mer-m8)	0.874	1	ENSG00000159388	ENST00000290551	3'UTR	5.24187	8.13354	2.18907	1	9.49896	10.6382	0	0					BTG2	BTG family, member 2 [Source:HGNC Symbol;Acc:1131]	protein_coding
chr1+:203277475-203277574	AGGCAGU weakly ACUGCCU hsa-miR-34b*(7mer-m8) hsa-miR-449c(7mer-m8)	0.6792	0.9608	ENSG00000159388	ENST00000290551	3'UTR	0	0	6.56722	4	524.026	510.633	6.70853	6.42735					BTG2	BTG family, member 2 [Source:HGNC Symbol;Acc:1131]	protein_coding
chr1+:203277580-203277661	AUUGCAC vertebrate GUGCAAU hsa-miR-25(7mer-m8) hsa-miR-32(7mer-m8) hsa-miR-92a(7mer-m8) hsa-miR-363(7mer-m8) hsa-miR-367(7mer-m8) hsa-miR-92b(7mer-m8)	0.2353	0.9818	ENSG00000159388	ENST00000290551	3'UTR	131.047	134.203	8.7563	11	17.4148	13.6777	0	3.21367					BTG2	BTG family, member 2 [Source:HGNC Symbol;Acc:1131]	protein_coding
chr1+:203277670-203277735	AAGCCCA no	0.0951	1	ENSG00000159388	ENST00000290551	3'UTR	36.6931	28.4674	0	1	4.74948	13.6777	0	0					BTG2	BTG family, member 2 [Source:HGNC Symbol;Acc:1131]	protein_coding
chr1+:203277699-203277746	GCCAGCC weakly GGCUGGC hsa-miR-3194(7mer-m8)	0.198	0.7763	ENSG00000159388	ENST00000290551	3'UTR	5.24187	20.3339	0	1	3.16632	4.55922	0	0					BTG2	BTG family, member 2 [Source:HGNC Symbol;Acc:1131]	protein_coding
chr1+:203277746-203277789	CUCCCAU no AUGGGAG hsa-miR-2116*(7mer-m8)	0.5069	0.9423	ENSG00000159388	ENST00000290551	3'UTR	5.24187	12.2003	0	0	0	0	0	0					BTG2	BTG family, member 2 [Source:HGNC Symbol;Acc:1131]	protein_coding
chr1+:203277755-203277808	CUCCCAU no AUGGGAG hsa-miR-2116*(7mer-m8)	0.115	0.8367	ENSG00000159388	ENST00000290551	3'UTR	41.935	36.6009	4.37815	7	0	1.51974	0	0					BTG2	BTG family, member 2 [Source:HGNC Symbol;Acc:1131]	protein_coding
chr1+:203277800-203277869	UUAGUGU weakly ACACUA hsa-miR-142-3p(6mer-m8) CACUAA ebv-miR-BART1-5p(6mer-m8)	0.6529	1	ENSG00000159388	ENST00000290551	3'UTR	492.736	333.475	28.458	25	1.58316	4.55922	0	0					BTG2	BTG family, member 2 [Source:HGNC Symbol;Acc:1131]	protein_coding
chr1+:203277812-203277856	UUAGUGU weakly ACACUA hsa-miR-142-3p(6mer-m8) CACUAA ebv-miR-BART1-5p(6mer-m8)	0.0738	1	ENSG00000159388	ENST00000290551	3'UTR	20.9675	28.4674	0	0	4.74948	1.51974	0	0					BTG2	BTG family, member 2 [Source:HGNC Symbol;Acc:1131]	protein_coding
chr1+:203277839-203277878	AGCACCA vertebrate UGGUGCU hsa-miR-29a(7mer-m8) hsa-miR-29b(7mer-m8) hsa-miR-29c(7mer-m8)	0.5557	1	ENSG00000159388	ENST00000290551	3'UTR	10.4837	24.4006	4.37815	0	4.74948	0	0	0	x				BTG2	BTG family, member 2 [Source:HGNC Symbol;Acc:1131]	protein_coding
chr1+:203277900-203277975	AUUGCAC vertebrate GUGCAAU hsa-miR-25(7mer-m8) hsa-miR-32(7mer-m8) hsa-miR-92a(7mer-m8) hsa-miR-363(7mer-m8) hsa-miR-367(7mer-m8) hsa-miR-92b(7mer-m8)	0.199	0.9809	ENSG00000159388	ENST00000290551	3'UTR	62.9025	101.669	10.9454	9	25.3305	22.7961	3.35426	12.8547					BTG2	BTG family, member 2 [Source:HGNC Symbol;Acc:1131]	protein_coding
chr1+:203277938-203277981	CAACCCA no UGGGUU hsa-miR-1273d(6mer)	0.1267	0.842	ENSG00000159388	ENST00000290551	3'UTR	5.24187	32.5342	2.18907	0	0	0	0	0					BTG2	BTG family, member 2 [Source:HGNC Symbol;Acc:1131]	protein_coding
chr1+:203278162-203278217	AGGAAAG no CUUUCC hsa-miR-3153(6mer-m8)	0.4322	1	ENSG00000159388	ENST00000290551	3'UTR	57.6606	48.8013	2.18907	3	0	0	0	0					BTG2	BTG family, member 2 [Source:HGNC Symbol;Acc:1131]	protein_coding
chr1+:203278195-203278270	GAGUGUU weakly AACACUC hsa-miR-3659(7mer-m8)	0.5307	0.9405	ENSG00000159388	ENST00000290551	3'UTR	20.9675	16.2671	8.7563	5	14.2484	25.8356	10.0628	16.0684					BTG2	BTG family, member 2 [Source:HGNC Symbol;Acc:1131]	protein_coding
chr1+:203278259-203278310	UACAAAA no UUUGUA hsa-miR-524-5p(6mer) hsa-miR-520d-5p(6mer) hsa-miR-1283(6mer-m8) ebv-miR-BART22(6mer)	0.3473	0.9976	ENSG00000159388	ENST00000290551	3'UTR	10.4837	16.2671	2.18907	1	7.9158	12.1579	0	0					BTG2	BTG family, member 2 [Source:HGNC Symbol;Acc:1131]	protein_coding
chr1+:203278301-203278339	AUAAAGA no CUUUAU hsa-miR-142-5p(6mer) hsa-miR-340(6mer-m8)	0.2859	0.5676	ENSG00000159388	ENST00000290551	3'UTR	20.9675	12.2003	0	5	4.74948	10.6382	0	0					BTG2	BTG family, member 2 [Source:HGNC Symbol;Acc:1131]	protein_coding
chr1+:203278301-203278382	AAAGUGA weakly UCACUUU hsa-miR-3609(7mer-m8)	0.0661	0.9375	ENSG00000159388	ENST00000290551	3'UTR	267.336	191.138	26.2689	35	3.16632	3.03948	0	0					BTG2	BTG family, member 2 [Source:HGNC Symbol;Acc:1131]	protein_coding
chr1+:203278364-203278397	CCACAAA no	0.4363	1	ENSG00000159388	ENST00000290551	3'UTR	20.9675	20.3339	0	1	3.16632	3.03948	0	0					BTG2	BTG family, member 2 [Source:HGNC Symbol;Acc:1131]	protein_coding
chr1+:203278377-203278432	UUCACAG vertebrate CUGUGAA hsa-miR-27a(7mer-A1) hsa-miR-27b(7mer-A1) hsa-miR-513a-5p(7mer-A1)	0.8946	0.9506	ENSG00000159388	ENST00000290551	3'UTR	5.24187	8.13354	0	0	25.3305	21.2764	3.35426	6.42735					BTG2	BTG family, member 2 [Source:HGNC Symbol;Acc:1131]	protein_coding
chr1+:203278490-203278559	AAAGUGA weakly UCACUUU hsa-miR-3609(7mer-m8)	0.1889	0.7489	ENSG00000159388	ENST00000290551	3'UTR	20.9675	4.06677	4.37815	7	26.9137	24.3159	10.0628	3.21367					BTG2	BTG family, member 2 [Source:HGNC Symbol;Acc:1131]	protein_coding
chr1+:203278689-203278719	UAAAGUA weakly UACUUUA hsa-miR-559(7mer-A1) hsa-miR-548b-5p(7mer-A1) hsa-miR-548a-5p(7mer-A1) hsa-miR-548c-5p(7mer-A1) hsa-miR-548d-5p(7mer-A1) hsa-miR-548j(7mer-A1) hsa-miR-548k(7mer-A1) hsa-miR-548l(7mer-A1) hsa-miR-548h(7mer-A1) hsa-miR-548i(7mer-A1) hsa-miR-548w(7mer-A1) hsa-miR-548y(7mer-A1)	0.9059	0.9422	ENSG00000159388	ENST00000290551	3'UTR	10.4837	0	0	5	36.4127	33.4343	36.8969	9.64102					BTG2	BTG family, member 2 [Source:HGNC Symbol;Acc:1131]	protein_coding
chr1+:203690477-203690507	AUAGAAU no	0.8682	0.5996	ENSG00000058668	ENST00000357681	CDS	0	0	8.7563	11	0	0	0	0					ATP2B4	ATPase, Ca++ transporting, plasma membrane 4 [Source:HGNC Symbol;Acc:817]	protein_coding
chr1+:203712007-203712081	AUUGCAC vertebrate GUGCAAU hsa-miR-25(7mer-m8) hsa-miR-32(7mer-m8) hsa-miR-92a(7mer-m8) hsa-miR-363(7mer-m8) hsa-miR-367(7mer-m8) hsa-miR-92b(7mer-m8)	0.0376	0.7206	ENSG00000058668	ENST00000357681	3'UTR	0	0	6.56722	12	15.8316	9.11845	10.0628	0					ATP2B4	ATPase, Ca++ transporting, plasma membrane 4 [Source:HGNC Symbol;Acc:817]	protein_coding
chr1+:203712352-203712417	UGAUGGU no ACCAUCA kshv-miR-K12-6-3p(7mer-A1)	0.1232	0.7254	ENSG00000058668	ENST00000357681	3'UTR	0	0	8.7563	5	0	1.51974	0	0					ATP2B4	ATPase, Ca++ transporting, plasma membrane 4 [Source:HGNC Symbol;Acc:817]	protein_coding
chr1+:203768561-203768612	AAUCCAA no	0.4633	0.9908	ENSG00000058673	ENST00000495527	protein_coding	0	0	2.18907	2	28.4969	12.1579	46.9597	19.282					ZC3H11A	zinc finger CCCH-type containing 11A [Source:HGNC Symbol;Acc:29093]	protein_coding
chr1+:203768765-203768822	AUGAUGG no CAUCAU hsa-miR-1272(6mer) hsa-miR-1322(6mer)	0.2672	0.3723	ENSG00000058673	ENST00000495527	protein_coding	0	0	2.18907	3	6.33264	7.59871	3.35426	9.64102					ZC3H11A	zinc finger CCCH-type containing 11A [Source:HGNC Symbol;Acc:29093]	protein_coding
chr1+:203769382-203769437	UUUUAGU no	0.0878	0.988	ENSG00000058673	ENST00000495527	protein_coding	0	0	2.18907	2	17.4148	19.7566	0	0					ZC3H11A	zinc finger CCCH-type containing 11A [Source:HGNC Symbol;Acc:29093]	protein_coding
chr1+:203769494-203769543	AGAAUAA no UAUUCU kshv-miR-K12-4-3p(6mer)	0.9295	0.9999	ENSG00000058673	ENST00000495527	protein_coding	0	4.06677	21.8907	23	64.9095	68.3884	67.0853	48.2051					ZC3H11A	zinc finger CCCH-type containing 11A [Source:HGNC Symbol;Acc:29093]	protein_coding
chr1+:203769656-203769712	UGUGUUU no AAACAC hsa-miR-3676(6mer-m8)	0.4755	0.4952	ENSG00000058673	ENST00000495527	protein_coding	0	0	0	0	11.0821	12.1579	6.70853	6.42735					ZC3H11A	zinc finger CCCH-type containing 11A [Source:HGNC Symbol;Acc:29093]	protein_coding
chr1+:203769796-203769826	AAAAUUU weakly AAAUUUU hsa-miR-4282(7mer-m8)	0	1	ENSG00000058673	ENST00000495527	protein_coding	0	0	28.458	20	25.3305	34.954	6.70853	6.42735					ZC3H11A	zinc finger CCCH-type containing 11A [Source:HGNC Symbol;Acc:29093]	protein_coding
chr1+:203770454-203770495	UAAGAAU no AUUCUU hsa-miR-186(6mer-m8) UUCUUA hsa-miR-3653(6mer) hsa-miR-3658(6mer-m8)	0.6684	0.7547	ENSG00000058673	ENST00000495527	protein_coding	0	4.06677	146.668	113	28.4969	19.7566	67.0853	64.2735					ZC3H11A	zinc finger CCCH-type containing 11A [Source:HGNC Symbol;Acc:29093]	protein_coding
chr1+:203819075-203819138	ACAUUCA vertebrate UGAAUGU hsa-miR-181a(7mer-m8) hsa-miR-181b(7mer-m8) hsa-miR-181c(7mer-m8) hsa-miR-181d(7mer-m8) hsa-miR-4262(7mer-m8)	0.1213	0.5632	ENSG00000058673	ENST00000367214	CDS	0	0	24.0798	31	1.58316	0	0	0		x			ZC3H11A	zinc finger CCCH-type containing 11A [Source:HGNC Symbol;Acc:29093]	protein_coding
chr1+:203821845-203821898	AGAAUAC no GUAUUCU kshv-miR-K12-4-3p(7mer-m8)	0.9444	0.96	ENSG00000058673	ENST00000495527	protein_coding	0	0	48.1596	95	3.16632	4.55922	10.0628	3.21367					ZC3H11A	zinc finger CCCH-type containing 11A [Source:HGNC Symbol;Acc:29093]	protein_coding
chr1+:203839139-203839192	GUAGUAA no UUACUA hsa-miR-628-3p(6mer-m8)	0.4103	0.7801	ENSG00000182004	ENST00000483099	protein_coding	10.4837	0	0	2	17.4148	12.1579	23.4799	41.7777					SNRPE	small nuclear ribonucleoprotein polypeptide E [Source:HGNC Symbol;Acc:11161]	protein_coding
chr1+:204495535-204495562|204499811-204499841	UAGUGCA vertebrate UGCACUA hsa-miR-130a(7mer-A1) hsa-miR-301a(7mer-A1) hsa-miR-130b(7mer-A1) hsa-miR-454(7mer-A1) hsa-miR-301b(7mer-A1) hsa-miR-4295(7mer-A1) hsa-miR-3666(7mer-A1)	0.6247	0.925	ENSG00000198625	ENST00000367182	CDS	31.4512	12.2003	8.7563	10	0	0	0	0					MDM4	Mdm4 p53 binding protein homolog (mouse) [Source:HGNC Symbol;Acc:6974]	protein_coding
chr1+:204501339-204501374	AAAGUGA weakly UCACUUU hsa-miR-3609(7mer-m8)	0.0325	0.6622	ENSG00000198625	ENST00000367182	CDS	10.4837	16.2671	2.18907	1	0	0	0	0					MDM4	Mdm4 p53 binding protein homolog (mouse) [Source:HGNC Symbol;Acc:6974]	protein_coding
chr1+:204519513-204519577	CCAGCAA no UUGCUG hsa-miR-545(6mer) hsa-miR-3120(6mer-m8) UGCUGG hsa-miR-338-3p(6mer) hsa-miR-634(6mer-m8)	0.0113	0.8849	ENSG00000198625	ENST00000367182	3'UTR	0	0	8.7563	48	0	0	0	0					MDM4	Mdm4 p53 binding protein homolog (mouse) [Source:HGNC Symbol;Acc:6974]	protein_coding
chr1+:204522343-204522397	UGGCAGU vertebrate ACUGCCA hsa-miR-34a(7mer-A1) hsa-miR-34c-5p(7mer-A1) hsa-miR-449a(7mer-A1) hsa-miR-449b(7mer-A1)	0.6319	0.6049	ENSG00000198625	ENST00000367182	3'UTR	10.4837	8.13354	2.18907	7	55.4106	66.8686	10.0628	6.42735					MDM4	Mdm4 p53 binding protein homolog (mouse) [Source:HGNC Symbol;Acc:6974]	protein_coding
chr1+:204522699-204522743	UGAUGGU no ACCAUCA kshv-miR-K12-6-3p(7mer-A1)	0.7879	0.9466	ENSG00000198625	ENST00000367182	3'UTR	0	4.06677	2.18907	9	23.7474	27.3553	10.0628	3.21367					MDM4	Mdm4 p53 binding protein homolog (mouse) [Source:HGNC Symbol;Acc:6974]	protein_coding
chr1+:204523042-204523095	AGUUAGU no	0.1181	0.3609	ENSG00000198625	ENST00000367182	3'UTR	0	4.06677	2.18907	4	33.2463	24.3159	10.0628	6.42735					MDM4	Mdm4 p53 binding protein homolog (mouse) [Source:HGNC Symbol;Acc:6974]	protein_coding
chr1+:204523393-204523452	UUCACAG vertebrate CUGUGAA hsa-miR-27a(7mer-A1) hsa-miR-27b(7mer-A1) hsa-miR-513a-5p(7mer-A1)	0.895	0.5326	ENSG00000198625	ENST00000367182	3'UTR	15.7256	40.6677	21.8907	26	3.16632	1.51974	0	0					MDM4	Mdm4 p53 binding protein homolog (mouse) [Source:HGNC Symbol;Acc:6974]	protein_coding
chr1+:204523631-204523671	GUAAACA vertebrate UGUUUAC hsa-miR-30a(7mer-m8) hsa-miR-30c(7mer-m8) hsa-miR-30d(7mer-m8) hsa-miR-30b(7mer-m8) hsa-miR-30e(7mer-m8)	0.9878	0.8115	ENSG00000198625	ENST00000367182	3'UTR	0	12.2003	2.18907	1	22.1642	34.954	0	0					MDM4	Mdm4 p53 binding protein homolog (mouse) [Source:HGNC Symbol;Acc:6974]	protein_coding
chr1+:204523676-204523734	UUCCAGC no GCUGGA hsa-miR-766(6mer-m8) CUGGAA hsa-miR-3180-5p(6mer)	0.7671	0.9925	ENSG00000198625	ENST00000367182	3'UTR	0	0	15.3235	21	82.3243	100.303	0	0					MDM4	Mdm4 p53 binding protein homolog (mouse) [Source:HGNC Symbol;Acc:6974]	protein_coding
chr1+:204524175-204524210	AGCAGCA vertebrate UGCUGCU hsa-miR-15a(7mer-m8) hsa-miR-16(7mer-m8) hsa-miR-15b(7mer-m8) hsa-miR-195(7mer-m8) hsa-miR-424(7mer-m8) hsa-miR-497(7mer-m8)	0.8497	0.9939	ENSG00000198625	ENST00000367182	3'UTR	5.24187	20.3339	6.56722	5	17.4148	31.9146	10.0628	12.8547					MDM4	Mdm4 p53 binding protein homolog (mouse) [Source:HGNC Symbol;Acc:6974]	protein_coding
chr1+:204525280-204525349	UCUUUGG vertebrate CCAAAGA hsa-miR-9(7mer-A1)	0.8229	0.9109	ENSG00000198625	ENST00000367182	3'UTR	0	0	4.37815	10	9.49896	4.55922	60.3768	54.6324					MDM4	Mdm4 p53 binding protein homolog (mouse) [Source:HGNC Symbol;Acc:6974]	protein_coding
chr1+:204525851-204525902	AAAGUGA weakly UCACUUU hsa-miR-3609(7mer-m8)	0.1259	0.5609	ENSG00000198625	ENST00000367182	3'UTR	15.7256	4.06677	0	4	0	0	0	0					MDM4	Mdm4 p53 binding protein homolog (mouse) [Source:HGNC Symbol;Acc:6974]	protein_coding
chr1+:204526131-204526206	GAGGUAG vertebrate CUACCUC hsa-let-7a(7mer-m8) hsa-let-7b(7mer-m8) hsa-let-7c(7mer-m8) hsa-let-7d(7mer-m8) hsa-let-7e(7mer-m8) hsa-let-7f(7mer-m8) hsa-miR-98(7mer-m8) hsa-let-7g(7mer-m8) hsa-let-7i(7mer-m8)	0.6739	0.821	ENSG00000198625	ENST00000367182	3'UTR	10.4837	24.4006	6.56722	13	183.646	191.487	30.1884	32.1367					MDM4	Mdm4 p53 binding protein homolog (mouse) [Source:HGNC Symbol;Acc:6974]	protein_coding
chr1+:204526898-204526924	AUCGGAA no UUCCGAU ebv-miR-BART18-3p(7mer-m8)	0.9862	1	ENSG00000198625	ENST00000367182	3'UTR	0	0	0	0	112.404	94.224	3.35426	9.64102					MDM4	Mdm4 p53 binding protein homolog (mouse) [Source:HGNC Symbol;Acc:6974]	protein_coding
chr1+:204527130-204527187	GUGCAAA vertebrate UUUGCAC hsa-miR-19a(7mer-m8) hsa-miR-19b(7mer-m8)	0.7397	0.8369	ENSG00000198625	ENST00000367182	3'UTR	31.4512	12.2003	6.56722	13	0	0	0	0					MDM4	Mdm4 p53 binding protein homolog (mouse) [Source:HGNC Symbol;Acc:6974]	protein_coding
chr1+:205571352-205571389	UUAGUGU weakly ACACUA hsa-miR-142-3p(6mer-m8) CACUAA ebv-miR-BART1-5p(6mer-m8)	0.0498	0.7932	ENSG00000174514	ENST00000367147	3'UTR	10.4837	8.13354	15.3235	28	0	0	0	0					MFSD4	major facilitator superfamily domain containing 4 [Source:HGNC Symbol;Acc:25433]	protein_coding
chr1+:206757832-206757905	GAUGGCA no UGCCAU hsa-miR-183(6mer)	0.1779	0.8943	ENSG00000136653	ENST00000304534	CDS	0	4.06677	15.3235	7	6.33264	6.07896	23.4799	25.7094					RASSF5	Ras association (RalGDS/AF-6) domain family member 5 [Source:HGNC Symbol;Acc:17609]	protein_coding
chr1+:206760337-206760393	AAAAGUG weakly CACUUUU hsa-miR-548t(7mer-m8)	0.1358	0.9782	ENSG00000136653	ENST00000304534	3'UTR	5.24187	4.06677	2.18907	4	0	0	0	0					RASSF5	Ras association (RalGDS/AF-6) domain family member 5 [Source:HGNC Symbol;Acc:17609]	protein_coding
chr1+:206760668-206760701	AAGAAUC no AUUCUU hsa-miR-186(6mer-m8)	0.969	0.9178	ENSG00000136653	ENST00000304534	3'UTR	0	0	0	5	0	0	114.045	109.265					RASSF5	Ras association (RalGDS/AF-6) domain family member 5 [Source:HGNC Symbol;Acc:17609]	protein_coding
chr1+:206762292-206762345	NA	0	0	ENSG00000136653	ENST00000304534	3'UTR	0	0	2.18907	2	11.0821	4.55922	16.7713	35.3504					RASSF5	Ras association (RalGDS/AF-6) domain family member 5 [Source:HGNC Symbol;Acc:17609]	protein_coding
chr1+:206907257-206907323	UGAUGGC no	0.8672	1	ENSG00000162889	ENST00000367103	3'UTR	0	0	15.3235	15	53.8274	56.2304	103.982	131.761					MAPKAPK2	mitogen-activated protein kinase-activated protein kinase 2 [Source:HGNC Symbol;Acc:6887]	protein_coding
chr1+:207930887-207930935	AAAGGAU no AUCCUU hsa-miR-541*(6mer)	0.6159	0.9009	ENSG00000117335	ENST00000391917	CDS	0	0	19.7017	3	1.58316	3.03948	10.0628	6.42735					CD46	CD46 molecule, complement regulatory protein [Source:HGNC Symbol;Acc:6953]	protein_coding
chr1+:207930935-207930987|207932983-207933003	AAAGUGC vertebrate GCACUUU hsa-miR-17(7mer-m8) hsa-miR-20a(7mer-m8) hsa-miR-93(7mer-m8) hsa-miR-106a(7mer-m8) hsa-miR-106b(7mer-m8) hsa-miR-20b(7mer-m8) hsa-miR-526b*(7mer-m8) hsa-miR-519d(7mer-m8)	0.7483	0.5821	ENSG00000117335	ENST00000391917	CDS	131.047	154.537	177.315	161	1.58316	0	0	0					CD46	CD46 molecule, complement regulatory protein [Source:HGNC Symbol;Acc:6953]	protein_coding
chr1+:207966962-207966998	NA	0	0	ENSG00000117335	ENST00000391917	3'UTR	0	4.06677	6.56722	3	30.08	21.2764	13.4171	28.9231					CD46	CD46 molecule, complement regulatory protein [Source:HGNC Symbol;Acc:6953]	protein_coding
chr1+:207967111-207967177	AGUGUUA no UAACAC hsa-miR-3152(6mer) AACACU kshv-miR-K12-10a(6mer) hsa-miR-4255(6mer) hsa-miR-3659(6mer-m8)	0.5236	0.8576	ENSG00000117335	ENST00000391917	3'UTR	0	0	26.2689	27	6.33264	7.59871	0	3.21367					CD46	CD46 molecule, complement regulatory protein [Source:HGNC Symbol;Acc:6953]	protein_coding
chr1+:207967999-207968046	ACAAUCA no	0.9817	1	ENSG00000117335	ENST00000391917	3'UTR	20.9675	61.0016	13.1344	15	9.49896	6.07896	6.70853	3.21367					CD46	CD46 molecule, complement regulatory protein [Source:HGNC Symbol;Acc:6953]	protein_coding
chr1+:207968039-207968113	AAAGUGC vertebrate GCACUUU hsa-miR-17(7mer-m8) hsa-miR-20a(7mer-m8) hsa-miR-93(7mer-m8) hsa-miR-106a(7mer-m8) hsa-miR-106b(7mer-m8) hsa-miR-20b(7mer-m8) hsa-miR-526b*(7mer-m8) hsa-miR-519d(7mer-m8)	0.2826	0.7682	ENSG00000117335	ENST00000391917	3'UTR	15.7256	20.3339	17.5126	2	1.58316	1.51974	0	0					CD46	CD46 molecule, complement regulatory protein [Source:HGNC Symbol;Acc:6953]	protein_coding
chr1+:207968067-207968102	GGCUGAG no UCAGCC hsa-miR-3929(6mer-m8)	0.4682	0.5993	ENSG00000117335	ENST00000391917	3'UTR	10.4837	0	2.18907	6	0	0	0	0					CD46	CD46 molecule, complement regulatory protein [Source:HGNC Symbol;Acc:6953]	protein_coding
chr1+:207968199-207968272	AAGGCAA no UGCCUU hsa-miR-124(6mer) hsa-miR-506(6mer) hsa-miR-3714(6mer) hsa-miR-3910(6mer)	0.0456	0.7537	ENSG00000117335	ENST00000391917	3'UTR	15.7256	0	8.7563	34	0	0	0	0					CD46	CD46 molecule, complement regulatory protein [Source:HGNC Symbol;Acc:6953]	protein_coding
chr1+:209933475-209933525	UCACAUU vertebrate AAUGUGA hsa-miR-23a(7mer-m8) hsa-miR-23b(7mer-m8) hsa-miR-130a*(7mer-m8) kshv-miR-K12-3(7mer-A1) hsa-miR-23c(7mer-m8)	0.1924	0.998	ENSG00000009790	ENST00000367024	CDS	0	0	13.1344	14	0	0	0	0		x			TRAF3IP3	TRAF3 interacting protein 3 [Source:HGNC Symbol;Acc:30766]	protein_coding
chr1+:210025194-210025254	AGCAGCA vertebrate UGCUGCU hsa-miR-15a(7mer-m8) hsa-miR-16(7mer-m8) hsa-miR-15b(7mer-m8) hsa-miR-195(7mer-m8) hsa-miR-424(7mer-m8) hsa-miR-497(7mer-m8)	0.8356	0.9739	ENSG00000117597	ENST00000367020	3'UTR	36.6931	40.6677	32.8361	55	183.646	158.053	67.0853	64.2735					C1orf107	Digestive organ expansion factor homolog [Source:UniProtKB/Swiss-Prot;Acc:Q68CQ4]	protein_coding
chr1+:211487306-211487347	CUGAACA no	0.7495	0.9979	ENSG00000117625	ENST00000419091	3'UTR	0	0	28.458	15	3.16632	10.6382	10.0628	22.4957					RCOR3	REST corepressor 3 [Source:HGNC Symbol;Acc:25594]	protein_coding
chr1+:212241940-212241989	UAAAGUA weakly UACUUUA hsa-miR-559(7mer-A1) hsa-miR-548b-5p(7mer-A1) hsa-miR-548a-5p(7mer-A1) hsa-miR-548c-5p(7mer-A1) hsa-miR-548d-5p(7mer-A1) hsa-miR-548j(7mer-A1) hsa-miR-548k(7mer-A1) hsa-miR-548l(7mer-A1) hsa-miR-548h(7mer-A1) hsa-miR-548i(7mer-A1) hsa-miR-548w(7mer-A1) hsa-miR-548y(7mer-A1)	0.5984	0.3272	ENSG00000143476	ENST00000366991	CDS	5.24187	8.13354	2.18907	2	0	0	0	0					DTL	denticleless homolog (Drosophila) [Source:HGNC Symbol;Acc:30288]	protein_coding
chr1+:212241941-212242014	UGUGCAA vertebrate UUGCACA hsa-miR-19a(7mer-A1) hsa-miR-19b(7mer-A1)	0.3553	0.9763	ENSG00000143476	ENST00000366991	CDS	47.1769	52.868	6.56722	16	0	0	0	0					DTL	denticleless homolog (Drosophila) [Source:HGNC Symbol;Acc:30288]	protein_coding
chr1+:212242023-212242045|212245442-212245491	GUAGAGU no	0.1608	0.7349	ENSG00000143476	ENST00000366991	CDS	0	0	0	2	0	0	0	0					DTL	denticleless homolog (Drosophila) [Source:HGNC Symbol;Acc:30288]	protein_coding
chr1+:212251593-212251604|212253956-212254026	UUAGUGU weakly ACACUA hsa-miR-142-3p(6mer-m8) CACUAA ebv-miR-BART1-5p(6mer-m8)	0.1201	0.7413	ENSG00000143476	ENST00000366991	CDS	5.24187	20.3339	4.37815	5	4.74948	1.51974	0	0					DTL	denticleless homolog (Drosophila) [Source:HGNC Symbol;Acc:30288]	protein_coding
chr1+:212273629-212273683	AUUGCAC vertebrate GUGCAAU hsa-miR-25(7mer-m8) hsa-miR-32(7mer-m8) hsa-miR-92a(7mer-m8) hsa-miR-363(7mer-m8) hsa-miR-367(7mer-m8) hsa-miR-92b(7mer-m8)	0.2176	0.9686	ENSG00000143476	ENST00000366991	CDS	10.4837	12.2003	2.18907	6	0	0	0	0					DTL	denticleless homolog (Drosophila) [Source:HGNC Symbol;Acc:30288]	protein_coding
chr1+:212273730-212273777	GAUGGGA no	0.9182	0.6764	ENSG00000143476	ENST00000366991	CDS	0	4.06677	8.7563	8	0	3.03948	0	0					DTL	denticleless homolog (Drosophila) [Source:HGNC Symbol;Acc:30288]	protein_coding
chr1+:212276947-212276983	AGAAAAA no UUUUUC hsa-miR-3148(6mer-m8)	0.1445	0.5087	ENSG00000143476	ENST00000366991	3'UTR	15.7256	8.13354	0	0	0	0	0	0					DTL	denticleless homolog (Drosophila) [Source:HGNC Symbol;Acc:30288]	protein_coding
chr1+:212534348-212534379	AUCAUAG no CUAUGAU ebv-miR-BART7(7mer-m8)	0.9952	0.8089	ENSG00000066027	ENST00000261461	3'UTR	0	0	0	0	886.569	872.331	0	0					PPP2R5A	protein phosphatase 2, regulatory subunit B', alpha [Source:HGNC Symbol;Acc:9309]	protein_coding
chr1+:212534395-212534449	UGUGCAA vertebrate UUGCACA hsa-miR-19a(7mer-A1) hsa-miR-19b(7mer-A1)	0.1818	0.8733	ENSG00000066027	ENST00000261461	3'UTR	10.4837	32.5342	10.9454	15	11.0821	10.6382	0	0					PPP2R5A	protein phosphatase 2, regulatory subunit B', alpha [Source:HGNC Symbol;Acc:9309]	protein_coding
chr1+:212617748-212617784|212619171-212619195	GUAGUGU vertebrate ACACUAC hsa-miR-142-3p(7mer-m8)	0.7178	0.9338	ENSG00000117691	ENST00000366988	CDS	15.7256	8.13354	15.3235	23	61.7432	79.0265	63.731	44.9914					NENF	neuron derived neurotrophic factor [Source:HGNC Symbol;Acc:30384]	protein_coding
chr1+:212793399-212793430	AGAGUAC no GUACUC hsa-miR-1911(6mer)	0.9917	1	ENSG00000162772	ENST00000426071	3'UTR	0	0	17.5126	21	74.4085	74.4673	40.2512	22.4957					ATF3	activating transcription factor 3 [Source:HGNC Symbol;Acc:785]	protein_coding
chr1+:212988427-212988474	UAAUGCA no GCAUUA hsa-miR-155(6mer) kshv-miR-K12-11(6mer)	0.8212	0.5225	ENSG00000203705	ENST00000366974	CDS	0	0	15.3235	27	3.16632	1.51974	13.4171	25.7094					TATDN3	TatD DNase domain containing 3 [Source:HGNC Symbol;Acc:27010]	protein_coding
chr1+:213056762-213056780|213058634-213058670	CUCCCUC weakly GAGGGAG kshv-miR-K12-8*(7mer-m8)	0.6847	0.5778	ENSG00000162769	ENST00000366971	CDS	0	0	15.3235	23	3.16632	6.07896	20.1256	6.42735					FLVCR1	feline leukemia virus subgroup C cellular receptor 1 [Source:HGNC Symbol;Acc:24682]	protein_coding
chr1+:213068694-213068774	UCAAGUA vertebrate UACUUGA hsa-miR-26a(7mer-m8) hsa-miR-26b(7mer-m8) hsa-miR-1297(7mer-m8)	0.4265	0.9412	ENSG00000162769	ENST00000366971	3'UTR	10.4837	4.06677	2.18907	34	145.651	139.816	10.0628	6.42735					FLVCR1	feline leukemia virus subgroup C cellular receptor 1 [Source:HGNC Symbol;Acc:24682]	protein_coding
chr1+:213068743-213068793	UUAGAGU no CUCUAA hsa-miR-1303(6mer)	0.7903	0.9924	ENSG00000162769	ENST00000366971	3'UTR	10.4837	0	8.7563	10	15.8316	25.8356	46.9597	57.8461					FLVCR1	feline leukemia virus subgroup C cellular receptor 1 [Source:HGNC Symbol;Acc:24682]	protein_coding
chr1+:213068810-213068868	UAGUGUU weakly AACACUA kshv-miR-K12-10a(7mer-A1) hsa-miR-4255(7mer-A1)	0.958	0.7348	ENSG00000162769	ENST00000366971	3'UTR	26.2094	61.0016	52.5378	63	26.9137	39.5133	6.70853	0					FLVCR1	feline leukemia virus subgroup C cellular receptor 1 [Source:HGNC Symbol;Acc:24682]	protein_coding
chr1+:213069111-213069185	GUAGUGU vertebrate ACACUAC hsa-miR-142-3p(7mer-m8)	0.9697	0.7345	ENSG00000162769	ENST00000366971	3'UTR	10.4837	24.4006	105.076	98	134.569	135.257	197.902	234.598					FLVCR1	feline leukemia virus subgroup C cellular receptor 1 [Source:HGNC Symbol;Acc:24682]	protein_coding
chr1+:213069338-213069389	GGCAGCA no UGCUGC hsa-miR-15a(6mer-m8) hsa-miR-16(6mer-m8) hsa-miR-103(6mer) hsa-miR-107(6mer) hsa-miR-15b(6mer-m8) hsa-miR-195(6mer-m8) hsa-miR-424(6mer-m8) hsa-miR-497(6mer-m8) GCUGCC hsa-miR-885-3p(6mer)	0.7059	0.9611	ENSG00000162769	ENST00000366971	3'UTR	0	0	8.7563	13	12.6653	6.07896	0	0					FLVCR1	feline leukemia virus subgroup C cellular receptor 1 [Source:HGNC Symbol;Acc:24682]	protein_coding
chr1+:213161952-213161995	AAAGUGC vertebrate GCACUUU hsa-miR-17(7mer-m8) hsa-miR-20a(7mer-m8) hsa-miR-93(7mer-m8) hsa-miR-106a(7mer-m8) hsa-miR-106b(7mer-m8) hsa-miR-20b(7mer-m8) hsa-miR-526b*(7mer-m8) hsa-miR-519d(7mer-m8)	0.714	0.7015	ENSG00000143494	ENST00000366968	3'UTR	0	0	0	0	0	0	90.5652	102.838					VASH2	vasohibin 2 [Source:HGNC Symbol;Acc:25723]	protein_coding
chr1+:213162066-213162104	UUUAAAG no	0.7834	0.999	ENSG00000143494	ENST00000366968	3'UTR	0	0	0	0	0	0	87.2109	57.8461					VASH2	vasohibin 2 [Source:HGNC Symbol;Acc:25723]	protein_coding
chr1+:213162418-213162451	AGAAUAC no GUAUUCU kshv-miR-K12-4-3p(7mer-m8)	0.989	0.9911	ENSG00000143494	ENST00000366968	3'UTR	0	0	0	0	0	0	60.3768	99.6238			x		VASH2	vasohibin 2 [Source:HGNC Symbol;Acc:25723]	protein_coding
chr1+:213163709-213163747	GAAUACA no UGUAUU hsa-miR-655(6mer-m8) hsa-miR-374c(6mer-m8) GUAUUC kshv-miR-K12-4-3p(6mer-m8)	0.9773	0.7941	ENSG00000143494	ENST00000366968	3'UTR	0	0	2.18907	6	0	0	30.1884	44.9914					VASH2	vasohibin 2 [Source:HGNC Symbol;Acc:25723]	protein_coding
chr1+:213163793-213163823	GAAGGUA no UACCUU hsa-miR-548m(6mer-m8) ACCUUC hsa-miR-493(6mer)	0.9488	0.9103	ENSG00000143494	ENST00000366968	3'UTR	0	0	0	0	0	0	33.5426	44.9914					VASH2	vasohibin 2 [Source:HGNC Symbol;Acc:25723]	protein_coding
chr1+:213164880-213164918	NA	0	0	ENSG00000143494	ENST00000366968	3'UTR	0	0	0	1	0	0	174.422	218.53					VASH2	vasohibin 2 [Source:HGNC Symbol;Acc:25723]	protein_coding
chr1+:213415062-213415112	CCCAGAG no CUCUGG hsa-miR-520a-5p(6mer-m8) hsa-miR-525-5p(6mer-m8) UCUGGG hsa-miR-1912(6mer-m8)	0.2635	0.8888	ENSG00000136643	ENST00000366960	CDS	47.1769	28.4674	24.0798	33	0	0	0	0					RPS6KC1	ribosomal protein S6 kinase, 52kDa, polypeptide 1 [Source:HGNC Symbol;Acc:10439]	protein_coding
chr1+:213415287-213415340	UAAAGUG vertebrate CACUUUA hsa-miR-17(7mer-A1) hsa-miR-20a(7mer-A1) hsa-miR-93(7mer-A1) hsa-miR-106a(7mer-A1) hsa-miR-106b(7mer-A1) hsa-miR-20b(7mer-A1) hsa-miR-526b*(7mer-A1) hsa-miR-519d(7mer-A1) hsa-miR-3609(7mer-A1)	0.4411	0.9883	ENSG00000136643	ENST00000366960	CDS	78.6281	56.9348	15.3235	45	0	1.51974	0	0					RPS6KC1	ribosomal protein S6 kinase, 52kDa, polypeptide 1 [Source:HGNC Symbol;Acc:10439]	protein_coding
chr1+:213436073-213436125	GUAGUGU vertebrate ACACUAC hsa-miR-142-3p(7mer-m8)	0.4722	0.65	ENSG00000136643	ENST00000366960	CDS	10.4837	20.3339	8.7563	5	1.58316	1.51974	3.35426	0					RPS6KC1	ribosomal protein S6 kinase, 52kDa, polypeptide 1 [Source:HGNC Symbol;Acc:10439]	protein_coding
chr1+:213446480-213446542	ACAUUCA vertebrate UGAAUGU hsa-miR-181a(7mer-m8) hsa-miR-181b(7mer-m8) hsa-miR-181c(7mer-m8) hsa-miR-181d(7mer-m8) hsa-miR-4262(7mer-m8)	0.0312	0.8914	ENSG00000136643	ENST00000366960	3'UTR	0	0	17.5126	11	0	0	0	0		x			RPS6KC1	ribosomal protein S6 kinase, 52kDa, polypeptide 1 [Source:HGNC Symbol;Acc:10439]	protein_coding
chr1+:214510239-214510271	AAGUGCA weakly UGCACUU hsa-miR-519c-3p(7mer-m8) hsa-miR-519b-3p(7mer-m8) hsa-miR-519a(7mer-m8)	0.3027	0.7562	ENSG00000143499	ENST00000471645	protein_coding	0	8.13354	0	3	36.4127	27.3553	0	0					SMYD2	SET and MYND domain containing 2 [Source:HGNC Symbol;Acc:20982]	protein_coding
chr1+:214814742-214814778	UGUAGUA no ACUACA hsa-miR-20b*(6mer-m8)	0.5396	0.7399	ENSG00000117724	ENST00000366955	CDS	0	8.13354	4.37815	0	11.0821	9.11845	6.70853	12.8547					CENPF	centromere protein F, 350/400kDa (mitosin) [Source:HGNC Symbol;Acc:1857]	protein_coding
chr1+:214814756-214814800	AAGAUCC no GAUCUU hsa-miR-3156(6mer)	0.6873	0.6283	ENSG00000117724	ENST00000366955	CDS	0	0	17.5126	21	0	0	0	0					CENPF	centromere protein F, 350/400kDa (mitosin) [Source:HGNC Symbol;Acc:1857]	protein_coding
chr1+:214837396-214837445	GAUUGUG no CACAAU hsa-miR-4289(6mer-m8) ACAAUC hsa-miR-219-5p(6mer) hsa-miR-508-3p(6mer)	0.6995	0.8806	ENSG00000117724	ENST00000366955	3'UTR	5.24187	8.13354	21.8907	10	1.58316	1.51974	0	0					CENPF	centromere protein F, 350/400kDa (mitosin) [Source:HGNC Symbol;Acc:1857]	protein_coding
chr1+:215794327-215794403	GUGAUUC no	0.9488	1	ENSG00000136636	ENST00000444044	3'UTR	0	20.3339	30.647	41	12.6653	4.55922	0	0					KCTD3	potassium channel tetramerisation domain containing 3 [Source:HGNC Symbol;Acc:21305]	protein_coding
chr1+:215794418-215794450	AGCACCU no AGGUGC hsa-miR-500a*(6mer-m8) GGUGCU hsa-miR-29a(6mer) hsa-miR-29b(6mer) hsa-miR-29c(6mer) ebv-miR-BART1-3p(6mer) kshv-miR-K12-1*(6mer-m8) hsa-miR-3065-3p(6mer-m8) hsa-miR-3663-3p(6mer-m8)	0.727	1	ENSG00000136636	ENST00000444044	3'UTR	20.9675	32.5342	61.2941	46	0	0	0	0					KCTD3	potassium channel tetramerisation domain containing 3 [Source:HGNC Symbol;Acc:21305]	protein_coding
chr1+:215794772-215794820	UAGUGUU weakly AACACUA kshv-miR-K12-10a(7mer-A1) hsa-miR-4255(7mer-A1)	0.3546	0.9983	ENSG00000136636	ENST00000444044	3'UTR	10.4837	8.13354	15.3235	16	3.16632	6.07896	0	0					KCTD3	potassium channel tetramerisation domain containing 3 [Source:HGNC Symbol;Acc:21305]	protein_coding
chr1+:215794820-215794891	CACAUUC no GAAUGUG kshv-miR-K12-3(7mer-m8)	0.3424	0.362	ENSG00000136636	ENST00000444044	3'UTR	0	0	61.2941	86	0	0	0	0					KCTD3	potassium channel tetramerisation domain containing 3 [Source:HGNC Symbol;Acc:21305]	protein_coding
chr1+:215794854-215794891	ACAUUCA vertebrate UGAAUGU hsa-miR-181a(7mer-m8) hsa-miR-181b(7mer-m8) hsa-miR-181c(7mer-m8) hsa-miR-181d(7mer-m8) hsa-miR-4262(7mer-m8)	0.1915	0.6842	ENSG00000136636	ENST00000444044	3'UTR	0	0	8.7563	12	0	0	0	0					KCTD3	potassium channel tetramerisation domain containing 3 [Source:HGNC Symbol;Acc:21305]	protein_coding
chr1+:218511037-218511076	UUAGUGU weakly ACACUA hsa-miR-142-3p(6mer-m8) CACUAA ebv-miR-BART1-5p(6mer-m8)	0.6607	0.9379	ENSG00000067533	ENST00000366932	3'UTR	15.7256	12.2003	15.3235	23	28.4969	36.4738	13.4171	9.64102					RRP15	ribosomal RNA processing 15 homolog (S. cerevisiae) [Source:HGNC Symbol;Acc:24255]	protein_coding
chr1+:219385451-219385495	UAAUGUU weakly AACAUUA hsa-miR-33a*(7mer-A1) hsa-miR-409-3p(7mer-A1)	0.4551	0.9997	ENSG00000143353	ENST00000366928	3'UTR	15.7256	0	21.8907	11	0	0	0	0					LYPLAL1	lysophospholipase-like 1 [Source:HGNC Symbol;Acc:20440]	protein_coding
chr1+:219385649-219385687	AGCAGCA vertebrate UGCUGCU hsa-miR-15a(7mer-m8) hsa-miR-16(7mer-m8) hsa-miR-15b(7mer-m8) hsa-miR-195(7mer-m8) hsa-miR-424(7mer-m8) hsa-miR-497(7mer-m8)	0.8745	0.9918	ENSG00000143353	ENST00000366928	3'UTR	10.4837	32.5342	35.0252	38	14.2484	4.55922	0	0					LYPLAL1	lysophospholipase-like 1 [Source:HGNC Symbol;Acc:20440]	protein_coding
chr1+:220276885-220276904	AAGUGUU no AACACU kshv-miR-K12-10a(6mer) hsa-miR-4255(6mer) hsa-miR-3659(6mer-m8) ACACUU hsa-miR-595(6mer)	0.8535	0.5401	ENSG00000067704	ENST00000302637	CDS	0	0	2.18907	0	0	1.51974	20.1256	48.2051					IARS2	isoleucyl-tRNA synthetase 2, mitochondrial [Source:HGNC Symbol;Acc:29685]	protein_coding
chr1+:220315145-220315184	GGUCAUU no AAUGAC hsa-miR-616(6mer)	0.5244	1	ENSG00000067704	ENST00000302637	CDS	0	0	0	2	0	0	10.0628	38.5641					IARS2	isoleucyl-tRNA synthetase 2, mitochondrial [Source:HGNC Symbol;Acc:29685]	protein_coding
chr1+:220321337-220321359	AUCAUAG no CUAUGAU ebv-miR-BART7(7mer-m8)	0.9926	0.8854	ENSG00000067704	ENST00000302637	3'UTR	0	0	0	0	18.9979	34.954	0	0					IARS2	isoleucyl-tRNA synthetase 2, mitochondrial [Source:HGNC Symbol;Acc:29685]	protein_coding
chr1+:222839127-222839183	UAGCUUA vertebrate UAAGCUA hsa-miR-21(7mer-A1) hsa-miR-590-5p(7mer-A1)	0.4026	0.6308	ENSG00000154305	ENST00000344922	3'UTR	0	0	0	1	17.4148	7.59871	6.70853	12.8547					MIA3	melanoma inhibitory activity family, member 3 [Source:HGNC Symbol;Acc:24008]	protein_coding
chr1+:222839165-222839206	AUUGCAC vertebrate GUGCAAU hsa-miR-25(7mer-m8) hsa-miR-32(7mer-m8) hsa-miR-92a(7mer-m8) hsa-miR-363(7mer-m8) hsa-miR-367(7mer-m8) hsa-miR-92b(7mer-m8)	0.9837	0.7291	ENSG00000154305	ENST00000344922	3'UTR	15.7256	8.13354	26.2689	19	1.58316	0	6.70853	0					MIA3	melanoma inhibitory activity family, member 3 [Source:HGNC Symbol;Acc:24008]	protein_coding
chr1+:222906033-222906074	AAGUGCA weakly UGCACUU hsa-miR-519c-3p(7mer-m8) hsa-miR-519b-3p(7mer-m8) hsa-miR-519a(7mer-m8)	0.1503	0.9308	ENSG00000162819	ENST00000340934	CDS,3'UTR	5.24187	4.06677	8.7563	3	83.9074	80.5463	26.8341	22.4957					C1orf58	BRO1 domain-containing protein BROX Precursor [Source:UniProtKB/Swiss-Prot;Acc:Q5VW32]	protein_coding
chr1+:222906954-222906993	AAAGCUG mammals CAGCUUU hsa-miR-320a(7mer-m8) hsa-miR-320b(7mer-m8) hsa-miR-320c(7mer-m8) hsa-miR-320d(7mer-m8)	0.5278	0.5475	ENSG00000162819	ENST00000340934	3'UTR	0	0	0	2	47.4948	44.0725	20.1256	16.0684					C1orf58	BRO1 domain-containing protein BROX Precursor [Source:UniProtKB/Swiss-Prot;Acc:Q5VW32]	protein_coding
chr1+:222907548-222907615	UUAGUGU weakly ACACUA hsa-miR-142-3p(6mer-m8) CACUAA ebv-miR-BART1-5p(6mer-m8)	0.8968	0.7445	ENSG00000162819	ENST00000340934	3'UTR	10.4837	8.13354	19.7017	32	12.6653	6.07896	83.8566	48.2051					C1orf58	BRO1 domain-containing protein BROX Precursor [Source:UniProtKB/Swiss-Prot;Acc:Q5VW32]	protein_coding
chr1+:2238451-2238506	AAAAGUG weakly CACUUUU hsa-miR-548t(7mer-m8)	0.7419	0.8324	ENSG00000157933	ENST00000378536	3'UTR	0	0	2.18907	2	28.4969	13.6777	20.1256	25.7094					SKI	v-ski sarcoma viral oncogene homolog (avian) [Source:HGNC Symbol;Acc:10896]	protein_coding
chr1+:2239170-2239222	AGGGAAG no CUUCCC hsa-miR-4271(6mer-m8)	0.2706	0.3217	ENSG00000157933	ENST00000378536	3'UTR	10.4837	4.06677	0	1	3.16632	3.03948	0	0					SKI	v-ski sarcoma viral oncogene homolog (avian) [Source:HGNC Symbol;Acc:10896]	protein_coding
chr1+:223962808-223962864	AAAGUGU no ACACUU hsa-miR-595(6mer) CACUUU hsa-miR-17(6mer) hsa-miR-20a(6mer) hsa-miR-93(6mer) hsa-miR-106a(6mer) hsa-miR-106b(6mer) hsa-miR-20b(6mer) hsa-miR-526b*(6mer) hsa-miR-519d(6mer) hsa-miR-520g(6mer-m8) hsa-miR-520h(6mer-m8) hsa-miR-548t(6mer-m8) hsa-miR-3609(6mer)	0.202	0.8823	ENSG00000162909	ENST00000295006	3'UTR	0	0	2.18907	8	44.3285	60.7896	26.8341	28.9231					CAPN2	calpain 2, (m/II) large subunit [Source:HGNC Symbol;Acc:1479]	protein_coding
chr1+:223963474-223963538	ACAGUAC vertebrate GUACUGU hsa-miR-101(7mer-m8)	0.8812	0.8394	ENSG00000162909	ENST00000295006	3'UTR	0	0	0	9	7.9158	4.55922	26.8341	25.7094					CAPN2	calpain 2, (m/II) large subunit [Source:HGNC Symbol;Acc:1479]	protein_coding
chr1+:22416529-22416580	AGCAGCA vertebrate UGCUGCU hsa-miR-15a(7mer-m8) hsa-miR-16(7mer-m8) hsa-miR-15b(7mer-m8) hsa-miR-195(7mer-m8) hsa-miR-424(7mer-m8) hsa-miR-497(7mer-m8)	0.4745	0.8108	ENSG00000070831	ENST00000315554	3'UTR	15.7256	12.2003	0	1	0	0	0	0	x				CDC42	cell division cycle 42 (GTP binding protein, 25kDa) [Source:HGNC Symbol;Acc:1736]	protein_coding
chr1+:22419223-22419257	UAACACU vertebrate AGUGUUA hsa-miR-141(7mer-A1) hsa-miR-200a(7mer-A1) ebv-miR-BART9(7mer-A1)	0.9088	0.6885	ENSG00000070831	ENST00000421089	3'UTR	0	0	0	0	31.6632	27.3553	0	0					CDC42	cell division cycle 42 (GTP binding protein, 25kDa) [Source:HGNC Symbol;Acc:1736]	protein_coding
chr1+:224345525-224345606	UUCAAGU vertebrate ACUUGAA hsa-miR-26a(7mer-A1) hsa-miR-26b(7mer-A1) hsa-miR-1297(7mer-A1)	0.7049	0.6841	ENSG00000143756	ENST00000366862	3'UTR	0	0	0	7	34.8295	41.033	6.70853	9.64102					FBXO28	F-box protein 28 [Source:HGNC Symbol;Acc:29046]	protein_coding
chr1+:224345803-224345836	UUCAAGU vertebrate ACUUGAA hsa-miR-26a(7mer-A1) hsa-miR-26b(7mer-A1) hsa-miR-1297(7mer-A1)	0.7493	0.8183	ENSG00000143756	ENST00000366862	3'UTR	5.24187	12.2003	21.8907	17	1.58316	0	0	0					FBXO28	F-box protein 28 [Source:HGNC Symbol;Acc:29046]	protein_coding
chr1+:224345828-224345869	AUAGUGU no ACACUA hsa-miR-142-3p(6mer-m8)	0.7129	0.9535	ENSG00000143756	ENST00000366862	3'UTR	5.24187	4.06677	41.5924	46	25.3305	34.954	6.70853	12.8547					FBXO28	F-box protein 28 [Source:HGNC Symbol;Acc:29046]	protein_coding
chr1+:224345947-224345985	AUGGAAG no CUUCCA hsa-miR-3190(6mer-m8) UUCCAU hsa-miR-3688(6mer)	0.5514	1	ENSG00000143756	ENST00000366862	3'UTR	5.24187	28.4674	21.8907	31	6.33264	7.59871	3.35426	12.8547					FBXO28	F-box protein 28 [Source:HGNC Symbol;Acc:29046]	protein_coding
chr1+:224346118-224346172	AGUGCAA vertebrate UUGCACU hsa-miR-130a(7mer-m8) hsa-miR-301a(7mer-m8) hsa-miR-130b(7mer-m8) hsa-miR-454(7mer-m8) hsa-miR-301b(7mer-m8) hsa-miR-4295(7mer-m8) hsa-miR-3666(7mer-m8)	0.3584	0.9234	ENSG00000143756	ENST00000366862	3'UTR	15.7256	12.2003	2.18907	6	0	0	0	0					FBXO28	F-box protein 28 [Source:HGNC Symbol;Acc:29046]	protein_coding
chr1+:224346600-224346648	UUUGUUU no AAACAAA ebv-miR-BART19-3p(7mer-m8)	0.982	0.6475	ENSG00000143756	ENST00000366862	3'UTR	0	0	0	0	56.9937	60.7896	0	0					FBXO28	F-box protein 28 [Source:HGNC Symbol;Acc:29046]	protein_coding
chr1+:224347666-224347718	AGAUGAU no AUCAUC hsa-miR-3682(6mer) UCAUCU hsa-miR-143(6mer-m8)	0.8944	0.8002	ENSG00000143756	ENST00000366862	3'UTR	0	0	59.105	60	23.7474	27.3553	13.4171	6.42735					FBXO28	F-box protein 28 [Source:HGNC Symbol;Acc:29046]	protein_coding
chr1+:224347719-224347772	UGUAGUG vertebrate CACUACA hsa-miR-142-3p(7mer-A1)	0.1162	0.7061	ENSG00000143756	ENST00000366862	3'UTR	26.2094	8.13354	13.1344	5	1.58316	0	0	0					FBXO28	F-box protein 28 [Source:HGNC Symbol;Acc:29046]	protein_coding
chr1+:224348133-224348176	AUCCAUG no	0.3815	0.7082	ENSG00000143756	ENST00000366862	3'UTR	0	0	15.3235	8	0	0	0	0					FBXO28	F-box protein 28 [Source:HGNC Symbol;Acc:29046]	protein_coding
chr1+:224348634-224348685	AUUACAC no	0.4304	0.7586	ENSG00000143756	ENST00000366862	3'UTR	20.9675	16.2671	6.56722	24	1.58316	1.51974	0	0					FBXO28	F-box protein 28 [Source:HGNC Symbol;Acc:29046]	protein_coding
chr1+:224348641-224348747	UAAUGCA no GCAUUA hsa-miR-155(6mer) kshv-miR-K12-11(6mer)	0.3086	0.8247	ENSG00000143756	ENST00000366862	3'UTR	31.4512	12.2003	24.0798	36	14.2484	4.55922	6.70853	3.21367					FBXO28	F-box protein 28 [Source:HGNC Symbol;Acc:29046]	protein_coding
chr1+:224348701-224348759	AAAGUGC vertebrate GCACUUU hsa-miR-17(7mer-m8) hsa-miR-20a(7mer-m8) hsa-miR-93(7mer-m8) hsa-miR-106a(7mer-m8) hsa-miR-106b(7mer-m8) hsa-miR-20b(7mer-m8) hsa-miR-526b*(7mer-m8) hsa-miR-519d(7mer-m8)	0.7635	0.5987	ENSG00000143756	ENST00000366862	3'UTR	41.935	12.2003	24.0798	22	1.58316	1.51974	0	3.21367					FBXO28	F-box protein 28 [Source:HGNC Symbol;Acc:29046]	protein_coding
chr1+:224348807-224348852	CCUCCAA no UUGGAG hsa-miR-515-5p(6mer-m8) hsa-miR-519e*(6mer-m8)	0.2641	1	ENSG00000143756	ENST00000366862	3'UTR	26.2094	16.2671	8.7563	8	0	0	0	0					FBXO28	F-box protein 28 [Source:HGNC Symbol;Acc:29046]	protein_coding
chr1+:224380039-224380103	UGUAGUG vertebrate CACUACA hsa-miR-142-3p(7mer-A1)	0.6727	0.7428	ENSG00000143753	ENST00000323699	CDS	5.24187	20.3339	6.56722	8	4.74948	1.51974	0	0					DEGS1	degenerative spermatocyte homolog 1, lipid desaturase (Drosophila) [Source:HGNC Symbol;Acc:13709]	protein_coding
chr1+:224563565-224563638	AGGAUGA no UCAUCC hsa-miR-1255a(6mer) hsa-miR-1255b(6mer) CAUCCU kshv-miR-K12-5(6mer) hsa-miR-1265(6mer) hsa-miR-3605-5p(6mer-m8)	0.8317	0.5767	ENSG00000143771	ENST00000465271	3'UTR	0	4.06677	2.18907	0	14.2484	9.11845	16.7713	0					CNIH4	cornichon homolog 4 (Drosophila) [Source:HGNC Symbol;Acc:25013]	protein_coding
chr1+:225977600-225977678	GUGGAAA no UUUCCA hsa-miR-875-3p(6mer-m8) hsa-miR-3688(6mer-m8) UUCCAC hsa-miR-3190(6mer)	0.6409	0.8723	ENSG00000143742	ENST00000366839	3'UTR	288.303	211.472	83.1848	82	6.33264	3.03948	0	3.21367					SRP9	signal recognition particle 9kDa [Source:HGNC Symbol;Acc:11304]	protein_coding
chr1+:227058308-227058330	NA	0	0	ENSG00000143801	ENST00000366783	5'UTR	0	0	466.273	581	1.58316	4.55922	0	0					PSEN2	presenilin 2 (Alzheimer disease 4) [Source:HGNC Symbol;Acc:9509]	protein_coding
chr1+:227174967-227175018	ACAUUCA vertebrate UGAAUGU hsa-miR-181a(7mer-m8) hsa-miR-181b(7mer-m8) hsa-miR-181c(7mer-m8) hsa-miR-181d(7mer-m8) hsa-miR-4262(7mer-m8)	0.4089	1	ENSG00000163050	ENST00000366779	3'UTR	0	20.3339	35.0252	54	18.9979	22.7961	3.35426	6.42735					CABC1	chaperone, ABC1 activity of bc1 complex homolog (S. pombe) [Source:HGNC Symbol;Acc:16812]	protein_coding
chr1+:227842104-227842170	GUGCAAA vertebrate UUUGCAC hsa-miR-19a(7mer-m8) hsa-miR-19b(7mer-m8)	0.1523	0.5965	ENSG00000181450	ENST00000343776	CDS	10.4837	4.06677	6.56722	4	0	0	0	0					ZNF678	zinc finger protein 678 [Source:HGNC Symbol;Acc:28652]	protein_coding
chr1+:227842595-227842635	UGUUGUG no	0.9066	1	ENSG00000181450	ENST00000343776	CDS	10.4837	20.3339	15.3235	14	30.08	59.2699	57.0225	106.051					ZNF678	zinc finger protein 678 [Source:HGNC Symbol;Acc:28652]	protein_coding
chr1+:227843255-227843309	GAUUGGU weakly ACCAAUC hsa-miR-509-3p(7mer-m8)	0.9863	0.4011	ENSG00000181450	ENST00000343776	CDS	0	4.06677	6.56722	2	18.9979	21.2764	30.1884	9.64102					ZNF678	zinc finger protein 678 [Source:HGNC Symbol;Acc:28652]	protein_coding
chr1+:227843593-227843648	AGCUUAC no UAAGCU hsa-miR-21(6mer) hsa-miR-27b*(6mer-m8) hsa-miR-590-5p(6mer)	0.8127	0.7959	ENSG00000181450	ENST00000343776	3'UTR	78.6281	158.604	144.479	253	756.75	703.64	281.758	308.513					ZNF678	zinc finger protein 678 [Source:HGNC Symbol;Acc:28652]	protein_coding
chr1+:227843694-227843724	UAGUACA no	0.1478	0.9979	ENSG00000181450	ENST00000343776	3'UTR	0	0	4.37815	5	26.9137	34.954	36.8969	19.282					ZNF678	zinc finger protein 678 [Source:HGNC Symbol;Acc:28652]	protein_coding
chr1+:227843897-227843961	UACAGUA vertebrate UACUGUA hsa-miR-101(7mer-A1) hsa-miR-144(7mer-A1)	0.4177	0.9805	ENSG00000181450	ENST00000343776	3'UTR	0	4.06677	0	2	23.7474	6.07896	0	0					ZNF678	zinc finger protein 678 [Source:HGNC Symbol;Acc:28652]	protein_coding
chr1+:227844073-227844111	UAAUGCA no GCAUUA hsa-miR-155(6mer) kshv-miR-K12-11(6mer)	0.9121	0.9596	ENSG00000181450	ENST00000343776	3'UTR	5.24187	0	10.9454	25	99.739	92.7042	100.628	77.1281					ZNF678	zinc finger protein 678 [Source:HGNC Symbol;Acc:28652]	protein_coding
chr1+:227845359-227845392	UUAGAGU no CUCUAA hsa-miR-1303(6mer)	0.105	0.7604	ENSG00000181450	ENST00000498759	protein_coding	5.24187	0	24.0798	20	14.2484	12.1579	0	0					ZNF678	zinc finger protein 678 [Source:HGNC Symbol;Acc:28652]	protein_coding
chr1+:227935602-227935663	AGGAUGG weakly CCAUCC hsa-miR-432*(6mer-m8) hsa-miR-1193(6mer) CAUCCU kshv-miR-K12-5(6mer) hsa-miR-1265(6mer) hsa-miR-3605-5p(6mer-m8)	0.341	0.9571	ENSG00000143740	ENST00000426344	CDS	0	0	15.3235	9	56.9937	51.6712	43.6054	44.9914					SNAP47	synaptosomal-associated protein, 47kDa [Source:HGNC Symbol;Acc:30669]	protein_coding
chr1+:228285098-228285153|228285291-228285306	AGUAGUG no CACUAC hsa-miR-142-3p(6mer) ACUACU hsa-miR-199a-3p(6mer-m8) hsa-miR-199b-3p(6mer-m8) hsa-miR-1244(6mer) hsa-miR-3129(6mer-m8)	0.1214	0.8033	ENSG00000143761	ENST00000272102	CDS	26.2094	44.7345	10.9454	13	1.58316	1.51974	0	0					ARF1	ADP-ribosylation factor 1 [Source:HGNC Symbol;Acc:652]	protein_coding
chr1+:228285580-228285650	GUAGUGA no UCACUA hsa-miR-921(6mer) hsa-miR-3606(6mer) CACUAC hsa-miR-142-3p(6mer)	0.5289	0.8555	ENSG00000143761	ENST00000272102	CDS	26.2094	32.5342	0	2	0	0	0	0					ARF1	ADP-ribosylation factor 1 [Source:HGNC Symbol;Acc:652]	protein_coding
chr1+:228285717-228285803	UGCCACA weakly UGUGGC hsa-miR-449b*(6mer-m8) GUGGCA hsa-miR-1227(6mer-m8)	0.8428	0.9959	ENSG00000143761	ENST00000272102	3'UTR	10.4837	44.7345	13.1344	9	3.16632	0	0	0					ARF1	ADP-ribosylation factor 1 [Source:HGNC Symbol;Acc:652]	protein_coding
chr1+:228285892-228285956	CCAGAAA no	0.9478	0.9525	ENSG00000143761	ENST00000272102	3'UTR	0	0	30.647	24	0	0	0	0					ARF1	ADP-ribosylation factor 1 [Source:HGNC Symbol;Acc:652]	protein_coding
chr1+:228286665-228286728	AAAGUAG no CUACUU hsa-miR-562(6mer) UACUUU hsa-miR-559(6mer) hsa-miR-548b-5p(6mer) hsa-miR-548a-5p(6mer) hsa-miR-548c-5p(6mer) hsa-miR-548d-5p(6mer) hsa-miR-548j(6mer) hsa-miR-548k(6mer) hsa-miR-548l(6mer) hsa-miR-548n(6mer-m8) hsa-miR-548h(6mer) hsa-miR-548i(6mer) hsa-miR-548w(6mer) hsa-miR-548y(6mer)	0.0869	0.6377	ENSG00000143761	ENST00000272102	3'UTR	0	4.06677	0	2	1.58316	3.03948	6.70853	19.282					ARF1	ADP-ribosylation factor 1 [Source:HGNC Symbol;Acc:652]	protein_coding
chr1+:228675570-228675579|228676660-228676687	UUCCACA weakly UGUGGAA hsa-miR-3692(7mer-m8)	0.8684	1	ENSG00000168159	ENST00000305943	CDS	5.24187	32.5342	2.18907	1	0	0	0	0					RNF187	ring finger protein 187 [Source:HGNC Symbol;Acc:27146]	protein_coding
chr1+:228682072-228682116	AAGGUGC vertebrate GCACCUU hsa-miR-18a(7mer-m8) hsa-miR-18b(7mer-m8)	0.1315	0.9231	ENSG00000168159	ENST00000305943	3'UTR	57.6606	65.0683	8.7563	11	0	0	0	0					RNF187	ring finger protein 187 [Source:HGNC Symbol;Acc:27146]	protein_coding
chr1+:229439855-229439896	GAAACUG weakly CAGUUU hsa-miR-548a-3p(6mer-m8) hsa-miR-548e(6mer-m8) hsa-miR-548f(6mer-m8) hsa-miR-548g(6mer)	0.5551	0.935	ENSG00000168118	ENST00000366690	3'UTR	5.24187	0	2.18907	2	11.0821	6.07896	13.4171	32.1367					RAB4A	RAB4A, member RAS oncogene family [Source:HGNC Symbol;Acc:9781]	protein_coding
chr1+:229440089-229440134	UAGUGAA weakly UUCACUA hsa-miR-3606(7mer-m8)	0.8084	0.8601	ENSG00000168118	ENST00000366690	3'UTR	36.6931	16.2671	15.3235	14	0	0	0	0					RAB4A	RAB4A, member RAS oncogene family [Source:HGNC Symbol;Acc:9781]	protein_coding
chr1+:231131561-231131601	AGCAGCA vertebrate UGCUGCU hsa-miR-15a(7mer-m8) hsa-miR-16(7mer-m8) hsa-miR-15b(7mer-m8) hsa-miR-195(7mer-m8) hsa-miR-424(7mer-m8) hsa-miR-497(7mer-m8)	0.5134	0.982	ENSG00000173409	ENST00000310256	CDS	15.7256	4.06677	13.1344	4	3.16632	3.03948	6.70853	9.64102					ARV1	ARV1 homolog (S. cerevisiae) [Source:HGNC Symbol;Acc:29561]	protein_coding
chr1+:231401097-231401149	AGAAUAC no GUAUUCU kshv-miR-K12-4-3p(7mer-m8)	0.8671	0.8715	ENSG00000116906	ENST00000366647	CDS	0	0	32.8361	23	1.58316	1.51974	0	9.64102					GNPAT	glyceronephosphate O-acyltransferase [Source:HGNC Symbol;Acc:4416]	protein_coding
chr1+:231413471-231413502	AUAGUGU no ACACUA hsa-miR-142-3p(6mer-m8)	0.3023	0.8064	ENSG00000116906	ENST00000366647	3'UTR	31.4512	40.6677	15.3235	24	0	0	10.0628	6.42735					GNPAT	glyceronephosphate O-acyltransferase [Source:HGNC Symbol;Acc:4416]	protein_coding
chr1+:231696874-231696937	AAGUGUU no AACACU kshv-miR-K12-10a(6mer) hsa-miR-4255(6mer) hsa-miR-3659(6mer-m8) ACACUU hsa-miR-595(6mer)	0.9086	0.5617	ENSG00000116918	ENST00000366639	CDS	15.7256	0	10.9454	10	26.9137	21.2764	412.575	385.641					TSNAX	translin-associated factor X [Source:HGNC Symbol;Acc:12380]	protein_coding
chr1+:231700871-231700937	UACAAAG weakly CUUUGUA hsa-miR-524-5p(7mer-m8) hsa-miR-520d-5p(7mer-m8) ebv-miR-BART22(7mer-m8)	0.995	0.7469	ENSG00000116918	ENST00000366639	3'UTR	0	0	0	0	1380.51	1392.08	0	0					TSNAX	translin-associated factor X [Source:HGNC Symbol;Acc:12380]	protein_coding
chr1+:233518748-233518801	GUGCAAA vertebrate UUUGCAC hsa-miR-19a(7mer-m8) hsa-miR-19b(7mer-m8)	0.7799	0.8555	ENSG00000143674	ENST00000366624	3'UTR	41.935	61.0016	2.18907	0	0	0	0	0					RP5-862P8.2	Mitogen-activated protein kinase kinase kinase (EC 2.7.11.25)(Mixed lineage kinase 4) [Source:UniProtKB/Swiss-Prot;Acc:Q5TCX8]	protein_coding
chr1+:233520780-233520821	ACAGCAC no GUGCUG kshv-miR-K12-1*(6mer) hsa-miR-3065-3p(6mer) UGCUGU hsa-miR-3120(6mer)	0.3122	0.7471	ENSG00000143674	ENST00000366624	3'UTR	68.1443	40.6677	0	0	0	0	0	0					RP5-862P8.2	Mitogen-activated protein kinase kinase kinase (EC 2.7.11.25)(Mixed lineage kinase 4) [Source:UniProtKB/Swiss-Prot;Acc:Q5TCX8]	protein_coding
chr1+:235493230-235493266	AGCUGCC vertebrate GGCAGCU hsa-miR-22(7mer-m8)	0.9899	0.4516	ENSG00000152904	ENST00000476121	5'UTR	0	0	0	0	1.58316	0	30.1884	16.0684					GGPS1	geranylgeranyl diphosphate synthase 1 [Source:HGNC Symbol;Acc:4249]	protein_coding
chr1+:235506331-235506372	UGAUGGU no ACCAUCA kshv-miR-K12-6-3p(7mer-A1)	0.9992	0.67	ENSG00000152904	ENST00000451121	3'UTR	0	0	13.1344	4	1.58316	0	36.8969	41.7777					GGPS1	geranylgeranyl diphosphate synthase 1 [Source:HGNC Symbol;Acc:4249]	protein_coding
chr1+:235507337-235507395	UUAGUGU weakly ACACUA hsa-miR-142-3p(6mer-m8) CACUAA ebv-miR-BART1-5p(6mer-m8)	0.6959	0.5171	ENSG00000152904	ENST00000451121	3'UTR	15.7256	4.06677	4.37815	10	0	0	3.35426	3.21367					GGPS1	geranylgeranyl diphosphate synthase 1 [Source:HGNC Symbol;Acc:4249]	protein_coding
chr1+:236371579-236371619	UAUUGCU vertebrate AGCAAUA hsa-miR-137(7mer-m8)	0.9511	0.5218	ENSG00000077585	ENST00000366592	3'UTR	5.24187	32.5342	0	0	0	0	0	0					GPR137B	G protein-coupled receptor 137B [Source:HGNC Symbol;Acc:11862]	protein_coding
chr1+:236371794-236371835	AAAGUGA weakly UCACUUU hsa-miR-3609(7mer-m8)	0.8342	0.8983	ENSG00000077585	ENST00000366592	3'UTR	78.6281	85.4022	0	0	0	0	0	0					GPR137B	G protein-coupled receptor 137B [Source:HGNC Symbol;Acc:11862]	protein_coding
chr1+:236371851-236371920	GAGGUAA no UACCUC hsa-let-7a(6mer) hsa-let-7b(6mer) hsa-let-7c(6mer) hsa-let-7d(6mer) hsa-let-7e(6mer) hsa-let-7f(6mer) hsa-miR-98(6mer) hsa-let-7g(6mer) hsa-let-7i(6mer) hsa-miR-202(6mer)	0.1772	1	ENSG00000077585	ENST00000366592	3'UTR	26.2094	44.7345	0	0	0	0	0	0					GPR137B	G protein-coupled receptor 137B [Source:HGNC Symbol;Acc:11862]	protein_coding
chr1+:236431215-236431256	GUACUGC no CAGUAC hsa-miR-1278(6mer-m8)	0.0019	0.8189	ENSG00000222650	ENST00000410718	snRNA	36.6931	4.06677	13.1344	3	47.4948	39.5133	16.7713	22.4957					U2	U2 spliceosomal RNA [Source:RFAM;Acc:RF00004]	snRNA
chr1+:236646678-236646701	NA	0	0	ENSG00000186197	ENST00000359362	3'UTR	47.1769	56.9348	6.56722	3	0	0	0	0					EDARADD	EDAR-associated death domain [Source:HGNC Symbol;Acc:14341]	protein_coding
chr1+:236702378-236702389|236703863-236703883	UUUACAG no CUGUAAA kshv-miR-K12-1(7mer-A1)	0.9553	1	ENSG00000116977	ENST00000493812	CDS	0	0	0	0	0	0	53.6682	48.2051			x		LGALS8	lectin, galactoside-binding, soluble, 8 [Source:HGNC Symbol;Acc:6569]	protein_coding
chr1+:237066704-237066756	UGCAGUG no CACUGC hsa-miR-34a(6mer-m8) hsa-miR-34c-5p(6mer-m8) hsa-miR-449a(6mer-m8) hsa-miR-449b(6mer-m8) ACUGCA hsa-miR-17*(6mer-m8) hsa-miR-143*(6mer-m8)	0.6026	0.7861	ENSG00000116984	ENST00000366577	3'UTR	0	0	6.56722	2	30.08	25.8356	174.422	112.479					MTR	5-methyltetrahydrofolate-homocysteine methyltransferase [Source:HGNC Symbol;Acc:7468]	protein_coding
chr1+:24019230-24019249|24020296-24020340	CAGUGUA no UACACU hsa-miR-4280(6mer) ACACUG hsa-miR-199a-5p(6mer-m8) hsa-miR-199b-5p(6mer-m8) hsa-miR-4302(6mer)	0.3802	1	ENSG00000142676	ENST00000443624	CDS	15.7256	12.2003	4.37815	11	41.1621	27.3553	6.70853	0					RPL11	ribosomal protein L11 [Source:HGNC Symbol;Acc:10301]	protein_coding
chr1+:24020335-24020380	UGUGCAG weakly CUGCACA hsa-miR-143*(7mer-A1)	0.0122	0.55	ENSG00000142676	ENST00000443624	CDS	5.24187	20.3339	0	0	0	0	0	0					RPL11	ribosomal protein L11 [Source:HGNC Symbol;Acc:10301]	protein_coding
chr1+:24020359-24020403|24021149-24021169	CCAAGAU no	0.0002	1	ENSG00000142676	ENST00000443624	CDS	15.7256	16.2671	6.56722	4	0	0	0	0					RPL11	ribosomal protein L11 [Source:HGNC Symbol;Acc:10301]	protein_coding
chr1+:24021243-24021281|24022287-24022303	AUAGAAG no	0.6514	0.5361	ENSG00000142676	ENST00000482370	protein_coding	0	0	4.37815	9	14.2484	7.59871	93.9194	64.2735					RPL11	ribosomal protein L11 [Source:HGNC Symbol;Acc:10301]	protein_coding
chr1+:24021270-24021281|24022287-24022303	AGCACCA vertebrate UGGUGCU hsa-miR-29a(7mer-m8) hsa-miR-29b(7mer-m8) hsa-miR-29c(7mer-m8)	0.1323	0.9728	ENSG00000142676	ENST00000482370	protein_coding	0	12.2003	2.18907	9	0	0	0	0					RPL11	ribosomal protein L11 [Source:HGNC Symbol;Acc:10301]	protein_coding
chr1+:24022294-24022337	GCUUCUU no AAGAAGC hsa-miR-103-2*(7mer-m8)	0.0008	1	ENSG00000142676	ENST00000482370	protein_coding	5.24187	0	15.3235	9	0	0	0	0					RPL11	ribosomal protein L11 [Source:HGNC Symbol;Acc:10301]	protein_coding
chr1+:24022318-24022375	GGCCCCA no UGGGGC hsa-miR-4323(6mer-m8) GGGGCC hsa-miR-296-5p(6mer-m8)	0.0835	0.7781	ENSG00000142676	ENST00000482370	protein_coding	20.9675	4.06677	21.8907	9	1.58316	0	0	0					RPL11	ribosomal protein L11 [Source:HGNC Symbol;Acc:10301]	protein_coding
chr1+:24022386-24022398|24022833-24022905	AACGGGA no UCCCGUU ebv-miR-BHRF1-3(7mer-m8)	0.7122	1	ENSG00000142676	ENST00000482370	protein_coding	73.3862	28.4674	8.7563	22	6.33264	10.6382	3.35426	19.282					RPL11	ribosomal protein L11 [Source:HGNC Symbol;Acc:10301]	protein_coding
chr1+:240638358-240638385	UUAAAUG no	0.5769	0.6616	ENSG00000155816	ENST00000406993	3'UTR	0	0	17.5126	19	0	0	0	0					FMN2	formin 2 [Source:HGNC Symbol;Acc:14074]	protein_coding
chr1+:240638358-240638407	AUUGCAC vertebrate GUGCAAU hsa-miR-25(7mer-m8) hsa-miR-32(7mer-m8) hsa-miR-92a(7mer-m8) hsa-miR-363(7mer-m8) hsa-miR-367(7mer-m8) hsa-miR-92b(7mer-m8)	0.7825	0.7572	ENSG00000155816	ENST00000406993	3'UTR	0	0	28.458	24	0	0	0	0		x			FMN2	formin 2 [Source:HGNC Symbol;Acc:14074]	protein_coding
chr1+:24078383-24078446	UUAGAGU no CUCUAA hsa-miR-1303(6mer)	0.6531	1	ENSG00000011007	ENST00000418390	CDS	62.9025	134.203	43.7815	181	360.96	337.383	241.507	286.017					TCEB3	transcription elongation factor B (SIII), polypeptide 3 (110kDa, elongin A) [Source:HGNC Symbol;Acc:11620]	protein_coding
chr1+:24086795-24086857	GUGCAAA vertebrate UUUGCAC hsa-miR-19a(7mer-m8) hsa-miR-19b(7mer-m8)	0.0037	0.6183	ENSG00000011007	ENST00000418390	3'UTR	20.9675	20.3339	10.9454	12	0	0	0	0					TCEB3	transcription elongation factor B (SIII), polypeptide 3 (110kDa, elongin A) [Source:HGNC Symbol;Acc:11620]	protein_coding
chr1+:24086988-24087058	AAAGUGC vertebrate GCACUUU hsa-miR-17(7mer-m8) hsa-miR-20a(7mer-m8) hsa-miR-93(7mer-m8) hsa-miR-106a(7mer-m8) hsa-miR-106b(7mer-m8) hsa-miR-20b(7mer-m8) hsa-miR-526b*(7mer-m8) hsa-miR-519d(7mer-m8)	0.6093	0.7948	ENSG00000011007	ENST00000418390	3'UTR	20.9675	20.3339	8.7563	15	6.33264	13.6777	0	3.21367					TCEB3	transcription elongation factor B (SIII), polypeptide 3 (110kDa, elongin A) [Source:HGNC Symbol;Acc:11620]	protein_coding
chr1+:24088210-24088264	AAAUGAG no UCAUUU hsa-miR-3646(6mer) hsa-miR-3662(6mer-m8)	0.2891	0.6299	ENSG00000011007	ENST00000418390	3'UTR	10.4837	16.2671	6.56722	6	0	1.51974	0	0					TCEB3	transcription elongation factor B (SIII), polypeptide 3 (110kDa, elongin A) [Source:HGNC Symbol;Acc:11620]	protein_coding
chr1+:24088238-24088299	AUUGCAC vertebrate GUGCAAU hsa-miR-25(7mer-m8) hsa-miR-32(7mer-m8) hsa-miR-92a(7mer-m8) hsa-miR-363(7mer-m8) hsa-miR-367(7mer-m8) hsa-miR-92b(7mer-m8)	0.8232	0.9999	ENSG00000011007	ENST00000418390	3'UTR	31.4512	32.5342	6.56722	42	248.556	261.395	244.861	253.88					TCEB3	transcription elongation factor B (SIII), polypeptide 3 (110kDa, elongin A) [Source:HGNC Symbol;Acc:11620]	protein_coding
chr1+:24088270-24088357	CCAAGGA no	0.3376	0.911	ENSG00000011007	ENST00000418390	3'UTR	47.1769	20.3339	6.56722	4	1.58316	0	0	0					TCEB3	transcription elongation factor B (SIII), polypeptide 3 (110kDa, elongin A) [Source:HGNC Symbol;Acc:11620]	protein_coding
chr1+:24088345-24088401	CCAGAAA no	0.3279	0.4722	ENSG00000011007	ENST00000418390	3'UTR	5.24187	0	6.56722	1	0	0	10.0628	3.21367					TCEB3	transcription elongation factor B (SIII), polypeptide 3 (110kDa, elongin A) [Source:HGNC Symbol;Acc:11620]	protein_coding
chr1+:24114505-24114562	ACUGACC no GGUCAG hsa-miR-4256(6mer-m8) GUCAGU hsa-miR-888*(6mer)	0.7252	0.9476	ENSG00000057757	ENST00000246151	3'UTR	41.935	44.7345	4.37815	9	1.58316	1.51974	0	0					C1orf128	UPF0424 protein C1orf128 [Source:UniProtKB/Swiss-Prot;Acc:Q9GZP4]	protein_coding
chr1+:24114654-24114700	UCACAGU vertebrate ACUGUGA hsa-miR-27a(7mer-m8) hsa-miR-27b(7mer-m8) hsa-miR-128(7mer-A1) hsa-miR-3681*(7mer-A1)	0.8169	1	ENSG00000057757	ENST00000246151	3'UTR	20.9675	16.2671	28.458	15	20.5811	22.7961	13.4171	3.21367					C1orf128	UPF0424 protein C1orf128 [Source:UniProtKB/Swiss-Prot;Acc:Q9GZP4]	protein_coding
chr1+:24121417-24121482	GGGCCCG no CGGGCC hsa-miR-1538(6mer) GGGCCC hsa-miR-296-5p(6mer)	0.4902	0.4944	ENSG00000011009	ENST00000374514	3'UTR	0	0	2.18907	3	1.58316	0	3.35426	9.64102					LYPLA2	lysophospholipase II [Source:HGNC Symbol;Acc:6738]	protein_coding
chr1+:24121518-24121594	GCCCAAA no UUUGGG hsa-miR-186*(6mer)	0.6834	0.6415	ENSG00000011009	ENST00000374514	3'UTR	0	0	4.37815	9	0	0	0	0					LYPLA2	lysophospholipase II [Source:HGNC Symbol;Acc:6738]	protein_coding
chr1+:24121610-24121671	CACGAUU no	0.8562	0.9506	ENSG00000011009	ENST00000374514	3'UTR	0	0	48.1596	41	0	0	0	0					LYPLA2	lysophospholipase II [Source:HGNC Symbol;Acc:6738]	protein_coding
chr1+:24121628-24121722	ACAUUCA vertebrate UGAAUGU hsa-miR-181a(7mer-m8) hsa-miR-181b(7mer-m8) hsa-miR-181c(7mer-m8) hsa-miR-181d(7mer-m8) hsa-miR-4262(7mer-m8)	0.384	0.8196	ENSG00000011009	ENST00000374514	3'UTR	0	0	39.4033	60	0	0	0	0		x			LYPLA2	lysophospholipase II [Source:HGNC Symbol;Acc:6738]	protein_coding
chr1+:241755283-241755353	UGUAGUG vertebrate CACUACA hsa-miR-142-3p(7mer-A1)	0.9057	0.6016	ENSG00000117009	ENST00000366559	CDS	178.224	219.606	26.2689	15	11.0821	24.3159	43.6054	41.7777					KMO	kynurenine 3-monooxygenase (kynurenine 3-hydroxylase) [Source:HGNC Symbol;Acc:6381]	protein_coding
chr1+:242015619-242015655	GAUCCCA no UGGGAUC kshv-miR-K12-7(7mer-m8)	0.9565	0.8582	ENSG00000174371	ENST00000366548	CDS	0	8.13354	10.9454	5	9.49896	9.11845	57.0225	61.0598					EXO1	exonuclease 1 [Source:HGNC Symbol;Acc:3511]	protein_coding
chr1+:242021906-242021931	AGAAUAC no GUAUUCU kshv-miR-K12-4-3p(7mer-m8)	0.9282	0.9693	ENSG00000174371	ENST00000366548	CDS	0	0	8.7563	1	3.16632	6.07896	50.314	51.4188					EXO1	exonuclease 1 [Source:HGNC Symbol;Acc:3511]	protein_coding
chr1+:244217942-244218022	UCACAGU vertebrate ACUGUGA hsa-miR-27a(7mer-m8) hsa-miR-27b(7mer-m8) hsa-miR-128(7mer-A1) hsa-miR-3681*(7mer-A1)	0.4552	0.5603	ENSG00000179456	ENST00000366538	CDS	47.1769	61.0016	13.1344	14	0	0	0	0					ZNF238	zinc finger protein 238 [Source:HGNC Symbol;Acc:13030]	protein_coding
chr1+:244218768-244218817	GUGCAAA vertebrate UUUGCAC hsa-miR-19a(7mer-m8) hsa-miR-19b(7mer-m8)	0.8672	0.7786	ENSG00000179456	ENST00000366538	3'UTR	5.24187	40.6677	10.9454	16	0	1.51974	0	0					ZNF238	zinc finger protein 238 [Source:HGNC Symbol;Acc:13030]	protein_coding
chr1+:244219113-244219155	AAAUUUU no AAAAUU hsa-miR-590-3p(6mer) AAAUUU hsa-miR-513a-3p(6mer) hsa-miR-4282(6mer-m8)	0.0523	1	ENSG00000179456	ENST00000366538	3'UTR	0	0	0	0	52.2443	41.033	0	0					ZNF238	zinc finger protein 238 [Source:HGNC Symbol;Acc:13030]	protein_coding
chr1+:244219429-244219478	GUAGCGU no	0.9108	1	ENSG00000179456	ENST00000366538	3'UTR	15.7256	24.4006	10.9454	1	188.396	167.172	36.8969	16.0684					ZNF238	zinc finger protein 238 [Source:HGNC Symbol;Acc:13030]	protein_coding
chr1+:244219665-244219703	GCAGCUU no AGCUGC hsa-miR-646(6mer-m8) hsa-miR-1301(6mer-m8)	0.9162	0.9925	ENSG00000179456	ENST00000366538	3'UTR	0	0	2.18907	0	41.1621	62.3094	0	0					ZNF238	zinc finger protein 238 [Source:HGNC Symbol;Acc:13030]	protein_coding
chr1+:244219696-244219756	GUAAACA vertebrate UGUUUAC hsa-miR-30a(7mer-m8) hsa-miR-30c(7mer-m8) hsa-miR-30d(7mer-m8) hsa-miR-30b(7mer-m8) hsa-miR-30e(7mer-m8)	0.9863	0.8077	ENSG00000179456	ENST00000366538	3'UTR	0	0	0	0	68.0759	68.3884	13.4171	28.9231					ZNF238	zinc finger protein 238 [Source:HGNC Symbol;Acc:13030]	protein_coding
chr1+:244220151-244220207	AAGUGCA weakly UGCACUU hsa-miR-519c-3p(7mer-m8) hsa-miR-519b-3p(7mer-m8) hsa-miR-519a(7mer-m8)	0.808	0.6617	ENSG00000179456	ENST00000366538	3'UTR	41.935	24.4006	21.8907	4	1.58316	6.07896	0	0					ZNF238	zinc finger protein 238 [Source:HGNC Symbol;Acc:13030]	protein_coding
chr1+:244220250-244220310	UUUACAG no CUGUAAA kshv-miR-K12-1(7mer-A1)	0.7722	0.5656	ENSG00000179456	ENST00000366538	3'UTR	0	0	17.5126	16	37.9958	53.1909	16.7713	0					ZNF238	zinc finger protein 238 [Source:HGNC Symbol;Acc:13030]	protein_coding
chr1+:244220417-244220460	UCAAGUA vertebrate UACUUGA hsa-miR-26a(7mer-m8) hsa-miR-26b(7mer-m8) hsa-miR-1297(7mer-m8)	0.9581	0.9798	ENSG00000179456	ENST00000366538	3'UTR	0	4.06677	4.37815	1	134.569	121.579	36.8969	32.1367					ZNF238	zinc finger protein 238 [Source:HGNC Symbol;Acc:13030]	protein_coding
chr1+:244220622-244220662	UGAUUGU vertebrate ACAAUCA hsa-miR-219-5p(7mer-A1) hsa-miR-508-3p(7mer-A1)	0.8422	1	ENSG00000179456	ENST00000366538	3'UTR	41.935	117.936	28.458	16	0	0	0	0					ZNF238	zinc finger protein 238 [Source:HGNC Symbol;Acc:13030]	protein_coding
chr1+:244220712-244220769	AGCACAC no GUGUGC ebv-miR-BART11-3p(6mer-m8)	0.8231	0.9993	ENSG00000179456	ENST00000366538	3'UTR	15.7256	28.4674	21.8907	11	197.895	234.04	13.4171	16.0684					ZNF238	zinc finger protein 238 [Source:HGNC Symbol;Acc:13030]	protein_coding
chr1+:244869835-244869872	UGUGCAA vertebrate UUGCACA hsa-miR-19a(7mer-A1) hsa-miR-19b(7mer-A1)	0.4411	0.8969	ENSG00000121644	ENST00000302550	3'UTR	15.7256	32.5342	2.18907	2	0	1.51974	0	0					PPPDE1	PPPDE peptidase domain containing 1 [Source:HGNC Symbol;Acc:24264]	protein_coding
chr1+:244870389-244870453	UAGUGUU weakly AACACUA kshv-miR-K12-10a(7mer-A1) hsa-miR-4255(7mer-A1)	0.1018	0.7446	ENSG00000121644	ENST00000302550	3'UTR	10.4837	28.4674	0	1	0	0	0	0					PPPDE1	PPPDE peptidase domain containing 1 [Source:HGNC Symbol;Acc:24264]	protein_coding
chr1+:244871920-244871983	AGCUUAC no UAAGCU hsa-miR-21(6mer) hsa-miR-27b*(6mer-m8) hsa-miR-590-5p(6mer)	0.8638	0.9125	ENSG00000121644	ENST00000302550	3'UTR	26.2094	20.3339	17.5126	9	4.74948	6.07896	6.70853	3.21367					PPPDE1	PPPDE peptidase domain containing 1 [Source:HGNC Symbol;Acc:24264]	protein_coding
chr1+:245007691-245007752	UGUAGUG vertebrate CACUACA hsa-miR-142-3p(7mer-A1)	0.2718	0.6526	ENSG00000203667	ENST00000411948	3'UTR	26.2094	20.3339	21.8907	41	3.16632	6.07896	0	0					FAM36A	family with sequence similarity 36, member A [Source:HGNC Symbol;Acc:26970]	protein_coding
chr1+:246755233-246755243|246784730-246784762	AAGGUGC vertebrate GCACCUU hsa-miR-18a(7mer-m8) hsa-miR-18b(7mer-m8)	0.8522	0.8239	ENSG00000162852	ENST00000366513	CDS	10.4837	28.4674	6.56722	10	1.58316	1.51974	0	0					CNST	consortin, connexin sorting protein [Source:HGNC Symbol;Acc:26486]	protein_coding
chr1+:246829055-246829108	AAAGUGC vertebrate GCACUUU hsa-miR-17(7mer-m8) hsa-miR-20a(7mer-m8) hsa-miR-93(7mer-m8) hsa-miR-106a(7mer-m8) hsa-miR-106b(7mer-m8) hsa-miR-20b(7mer-m8) hsa-miR-526b*(7mer-m8) hsa-miR-519d(7mer-m8)	0.6036	0.7797	ENSG00000162852	ENST00000366513	CDS	31.4512	81.3354	32.8361	32	22.1642	47.112	0	0					CNST	consortin, connexin sorting protein [Source:HGNC Symbol;Acc:26486]	protein_coding
chr1+:246829130-246829191	UUAGUGU weakly ACACUA hsa-miR-142-3p(6mer-m8) CACUAA ebv-miR-BART1-5p(6mer-m8)	0.209	0.7634	ENSG00000162852	ENST00000366513	CDS	26.2094	28.4674	17.5126	13	0	1.51974	0	0					CNST	consortin, connexin sorting protein [Source:HGNC Symbol;Acc:26486]	protein_coding
chr1+:246829159-246829221	GAGGUAG vertebrate CUACCUC hsa-let-7a(7mer-m8) hsa-let-7b(7mer-m8) hsa-let-7c(7mer-m8) hsa-let-7d(7mer-m8) hsa-let-7e(7mer-m8) hsa-let-7f(7mer-m8) hsa-miR-98(7mer-m8) hsa-let-7g(7mer-m8) hsa-let-7i(7mer-m8)	0.7417	1	ENSG00000162852	ENST00000366513	CDS,3'UTR	15.7256	36.6009	8.7563	7	1.58316	0	0	0					CNST	consortin, connexin sorting protein [Source:HGNC Symbol;Acc:26486]	protein_coding
chr1+:246829651-246829689	AUUACAC no	0.9425	1	ENSG00000162852	ENST00000366513	3'UTR	10.4837	24.4006	2.18907	3	0	1.51974	0	0					CNST	consortin, connexin sorting protein [Source:HGNC Symbol;Acc:26486]	protein_coding
chr1+:246830783-246830840	UUACAGU weakly ACUGUAA hsa-miR-582-5p(7mer-A1)	0.5459	0.9029	ENSG00000162852	ENST00000366513	3'UTR	0	4.06677	4.37815	3	4.74948	3.03948	0	6.42735					CNST	consortin, connexin sorting protein [Source:HGNC Symbol;Acc:26486]	protein_coding
chr1+:25168219-25168267	AAGAAUG no AUUCUU hsa-miR-186(6mer-m8)	0.9101	0.6763	ENSG00000169504	ENST00000374379	3'UTR	0	0	2.18907	1	41.1621	33.4343	63.731	54.6324					CLIC4	chloride intracellular channel 4 [Source:HGNC Symbol;Acc:13518]	protein_coding
chr1+:25168273-25168338	GUACAAA no UUUGUA hsa-miR-524-5p(6mer) hsa-miR-520d-5p(6mer) hsa-miR-1283(6mer-m8) ebv-miR-BART22(6mer)	0.3748	0.8066	ENSG00000169504	ENST00000374379	3'UTR	62.9025	89.469	4.37815	4	0	0	0	0					CLIC4	chloride intracellular channel 4 [Source:HGNC Symbol;Acc:13518]	protein_coding
chr1+:25168314-25168363	AAUCAGU no CUGAUU hsa-miR-34a*(6mer)	0.5404	0.6816	ENSG00000169504	ENST00000374379	3'UTR	26.2094	12.2003	0	2	0	0	0	0					CLIC4	chloride intracellular channel 4 [Source:HGNC Symbol;Acc:13518]	protein_coding
chr1+:25168604-25168671	AAGUGCA weakly UGCACUU hsa-miR-519c-3p(7mer-m8) hsa-miR-519b-3p(7mer-m8) hsa-miR-519a(7mer-m8)	0.6362	0.9023	ENSG00000169504	ENST00000374379	3'UTR	225.401	386.343	41.5924	52	25.3305	28.8751	10.0628	9.64102					CLIC4	chloride intracellular channel 4 [Source:HGNC Symbol;Acc:13518]	protein_coding
chr1+:25169214-25169261	UAGUGCA vertebrate UGCACUA hsa-miR-130a(7mer-A1) hsa-miR-301a(7mer-A1) hsa-miR-130b(7mer-A1) hsa-miR-454(7mer-A1) hsa-miR-301b(7mer-A1) hsa-miR-4295(7mer-A1) hsa-miR-3666(7mer-A1)	0.938	0.9657	ENSG00000169504	ENST00000374379	3'UTR	15.7256	16.2671	19.7017	26	0	0	10.0628	3.21367					CLIC4	chloride intracellular channel 4 [Source:HGNC Symbol;Acc:13518]	protein_coding
chr1+:25169307-25169364	UAAUGCC vertebrate GGCAUUA hsa-miR-365(7mer-A1)	0.0365	0.5877	ENSG00000169504	ENST00000374379	3'UTR	0	0	8.7563	14	1.58316	1.51974	6.70853	3.21367					CLIC4	chloride intracellular channel 4 [Source:HGNC Symbol;Acc:13518]	protein_coding
chr1+:25170201-25170268	UAGUGUA weakly UACACUA hsa-miR-4280(7mer-A1)	0.7191	0.8243	ENSG00000169504	ENST00000374379	3'UTR	120.563	239.94	111.643	74	148.817	144.375	117.399	151.043					CLIC4	chloride intracellular channel 4 [Source:HGNC Symbol;Acc:13518]	protein_coding
chr1+:25170304-25170361	UAUUUUC no GAAAAUA ebv-miR-BART2-5p(7mer-A1)	0.1393	0.8419	ENSG00000169504	ENST00000374379	3'UTR	0	0	0	0	82.3243	92.7042	0	0					CLIC4	chloride intracellular channel 4 [Source:HGNC Symbol;Acc:13518]	protein_coding
chr1+:25688339-25688407	UCACAUU vertebrate AAUGUGA hsa-miR-23a(7mer-m8) hsa-miR-23b(7mer-m8) hsa-miR-130a*(7mer-m8) kshv-miR-K12-3(7mer-A1) hsa-miR-23c(7mer-m8)	0.0978	0.5043	ENSG00000183726	ENST00000374358	3'UTR	0	0	6.56722	6	33.2463	30.3948	6.70853	3.21367					TMEM50A	transmembrane protein 50A [Source:HGNC Symbol;Acc:30590]	protein_coding
chr1+:25894052-25894142	AAAGUGC vertebrate GCACUUU hsa-miR-17(7mer-m8) hsa-miR-20a(7mer-m8) hsa-miR-93(7mer-m8) hsa-miR-106a(7mer-m8) hsa-miR-106b(7mer-m8) hsa-miR-20b(7mer-m8) hsa-miR-526b*(7mer-m8) hsa-miR-519d(7mer-m8)	0.0976	0.3835	ENSG00000157978	ENST00000374338	3'UTR	0	4.06677	19.7017	19	0	0	16.7713	6.42735		x			LDLRAP1	low density lipoprotein receptor adaptor protein 1 [Source:HGNC Symbol;Acc:18640]	protein_coding
chr1+:25894434-25894461	UAAAGUG vertebrate CACUUUA hsa-miR-17(7mer-A1) hsa-miR-20a(7mer-A1) hsa-miR-93(7mer-A1) hsa-miR-106a(7mer-A1) hsa-miR-106b(7mer-A1) hsa-miR-20b(7mer-A1) hsa-miR-526b*(7mer-A1) hsa-miR-519d(7mer-A1) hsa-miR-3609(7mer-A1)	0.2725	0.9997	ENSG00000157978	ENST00000374338	3'UTR	0	0	4.37815	4	0	1.51974	10.0628	16.0684					LDLRAP1	low density lipoprotein receptor adaptor protein 1 [Source:HGNC Symbol;Acc:18640]	protein_coding
chr1+:26449067-26449115	AGCAGCA vertebrate UGCUGCU hsa-miR-15a(7mer-m8) hsa-miR-16(7mer-m8) hsa-miR-15b(7mer-m8) hsa-miR-195(7mer-m8) hsa-miR-424(7mer-m8) hsa-miR-497(7mer-m8)	0.852	0.996	ENSG00000175087	ENST00000374271	CDS,3'UTR	47.1769	36.6009	4.37815	10	1.58316	1.51974	0	0					PDIK1L	PDLIM1 interacting kinase 1 like [Source:HGNC Symbol;Acc:18981]	protein_coding
chr1+:26451602-26451650	GUGCAAA vertebrate UUUGCAC hsa-miR-19a(7mer-m8) hsa-miR-19b(7mer-m8)	0.5989	0.9135	ENSG00000175087	ENST00000374271	3'UTR	26.2094	48.8013	10.9454	6	0	0	0	0					PDIK1L	PDLIM1 interacting kinase 1 like [Source:HGNC Symbol;Acc:18981]	protein_coding
chr1+:26451625-26451680	UAGUGCA vertebrate UGCACUA hsa-miR-130a(7mer-A1) hsa-miR-301a(7mer-A1) hsa-miR-130b(7mer-A1) hsa-miR-454(7mer-A1) hsa-miR-301b(7mer-A1) hsa-miR-4295(7mer-A1) hsa-miR-3666(7mer-A1)	0.012	0.424	ENSG00000175087	ENST00000374271	3'UTR	157.256	138.27	45.9706	38	15.8316	4.55922	3.35426	6.42735					PDIK1L	PDLIM1 interacting kinase 1 like [Source:HGNC Symbol;Acc:18981]	protein_coding
chr1+:26451653-26451727	AGCACCA vertebrate UGGUGCU hsa-miR-29a(7mer-m8) hsa-miR-29b(7mer-m8) hsa-miR-29c(7mer-m8)	0.1226	0.9865	ENSG00000175087	ENST00000374271	3'UTR	57.6606	28.4674	6.56722	17	4.74948	3.03948	3.35426	0					PDIK1L	PDLIM1 interacting kinase 1 like [Source:HGNC Symbol;Acc:18981]	protein_coding
chr1+:26795886-26795956	AAAGUGC vertebrate GCACUUU hsa-miR-17(7mer-m8) hsa-miR-20a(7mer-m8) hsa-miR-93(7mer-m8) hsa-miR-106a(7mer-m8) hsa-miR-106b(7mer-m8) hsa-miR-20b(7mer-m8) hsa-miR-526b*(7mer-m8) hsa-miR-519d(7mer-m8)	0.7905	0.7651	ENSG00000117682	ENST00000374194	3'UTR	31.4512	20.3339	0	6	11.0821	7.59871	3.35426	9.64102					DHDDS	dehydrodolichyl diphosphate synthase [Source:HGNC Symbol;Acc:20603]	protein_coding
chr1+:27100206-27100208|27100292-27100359	GAGAACU vertebrate AGUUCUC hsa-miR-146a(7mer-m8) hsa-miR-146b-5p(7mer-m8)	0.8241	0.9997	ENSG00000117713	ENST00000324856	CDS	15.7256	44.7345	0	3	0	4.55922	3.35426	9.64102					ARID1A	AT rich interactive domain 1A (SWI-like) [Source:HGNC Symbol;Acc:11110]	protein_coding
chr1+:27102105-27102159	UAAUGCC vertebrate GGCAUUA hsa-miR-365(7mer-A1)	0.0022	0.4575	ENSG00000117713	ENST00000324856	CDS	0	0	2.18907	0	1.58316	0	20.1256	41.7777					ARID1A	AT rich interactive domain 1A (SWI-like) [Source:HGNC Symbol;Acc:11110]	protein_coding
chr1+:27107783-27107844	UACAGUA vertebrate UACUGUA hsa-miR-101(7mer-A1) hsa-miR-144(7mer-A1)	0.5707	0.9725	ENSG00000117713	ENST00000324856	3'UTR	57.6606	89.469	214.529	145	75.9916	51.6712	103.982	67.4871					ARID1A	AT rich interactive domain 1A (SWI-like) [Source:HGNC Symbol;Acc:11110]	protein_coding
chr1+:27107808-27107881	UUUACAG no CUGUAAA kshv-miR-K12-1(7mer-A1)	0.9501	0.671	ENSG00000117713	ENST00000324856	3'UTR	15.7256	12.2003	297.714	273	150.4	188.448	368.969	376					ARID1A	AT rich interactive domain 1A (SWI-like) [Source:HGNC Symbol;Acc:11110]	protein_coding
chr1+:27107850-27107872	UACAGUA vertebrate UACUGUA hsa-miR-101(7mer-A1) hsa-miR-144(7mer-A1)	0.2504	0.5609	ENSG00000117713	ENST00000324856	3'UTR	5.24187	0	2.18907	3	3.16632	6.07896	3.35426	28.9231					ARID1A	AT rich interactive domain 1A (SWI-like) [Source:HGNC Symbol;Acc:11110]	protein_coding
chr1+:27107935-27108005	UGGGGGA weakly UCCCCCA hsa-miR-625(7mer-A1) kshv-miR-K12-12(7mer-A1) hsa-miR-1275(7mer-m8)	0.9896	0.7949	ENSG00000117713	ENST00000324856	3'UTR	0	0	6.56722	12	0	4.55922	63.731	96.4102					ARID1A	AT rich interactive domain 1A (SWI-like) [Source:HGNC Symbol;Acc:11110]	protein_coding
chr1+:27107978-27108057	ACAAUCA no	0.8918	1	ENSG00000117713	ENST00000324856	3'UTR	31.4512	32.5342	35.0252	33	60.1601	57.7502	20.1256	32.1367					ARID1A	AT rich interactive domain 1A (SWI-like) [Source:HGNC Symbol;Acc:11110]	protein_coding
chr1+:27108100-27108165	UGUGCAA vertebrate UUGCACA hsa-miR-19a(7mer-A1) hsa-miR-19b(7mer-A1)	0.2786	0.8935	ENSG00000117713	ENST00000324856	3'UTR	57.6606	109.803	4.37815	12	6.33264	1.51974	3.35426	0					ARID1A	AT rich interactive domain 1A (SWI-like) [Source:HGNC Symbol;Acc:11110]	protein_coding
chr1+:27181110-27181193	GUGCAAA vertebrate UUUGCAC hsa-miR-19a(7mer-m8) hsa-miR-19b(7mer-m8)	0.014	0.9351	ENSG00000204160	ENST00000374142	3'UTR	0	0	13.1344	19	11.0821	12.1579	0	0					ZDHHC18	zinc finger, DHHC-type containing 18 [Source:HGNC Symbol;Acc:20712]	protein_coding
chr1+:27660671-27660729	UGUAGCG no GCUACA hsa-miR-3137(6mer-m8)	0.6818	0.9082	ENSG00000186501	ENST00000464720	3'UTR	31.4512	73.2019	24.0798	24	4.74948	1.51974	0	0					TMEM222	transmembrane protein 222 [Source:HGNC Symbol;Acc:25363]	protein_coding
chr1+:28087486-28087548	UGGCAGU vertebrate ACUGCCA hsa-miR-34a(7mer-A1) hsa-miR-34c-5p(7mer-A1) hsa-miR-449a(7mer-A1) hsa-miR-449b(7mer-A1)	0.3326	1	ENSG00000009780	ENST00000373954	3'UTR	0	0	2.18907	3	23.7474	34.954	3.35426	3.21367					FAM76A	family with sequence similarity 76, member A [Source:HGNC Symbol;Acc:28530]	protein_coding
chr1+:28148962-28149026	GAAUUCC no	0.9745	1	ENSG00000117758	ENST00000373939	3'UTR	0	0	21.8907	26	41.1621	19.7566	234.799	244.239					STX12	syntaxin 12 [Source:HGNC Symbol;Acc:11430]	protein_coding
chr1+:28149463-28149540	UUAGUGU weakly ACACUA hsa-miR-142-3p(6mer-m8) CACUAA ebv-miR-BART1-5p(6mer-m8)	0.0699	1	ENSG00000117758	ENST00000373939	3'UTR	0	0	8.7563	5	3.16632	3.03948	90.5652	83.5555					STX12	syntaxin 12 [Source:HGNC Symbol;Acc:11430]	protein_coding
chr1+:28149531-28149601	UAAUGUU weakly AACAUUA hsa-miR-33a*(7mer-A1) hsa-miR-409-3p(7mer-A1)	0.6802	0.5403	ENSG00000117758	ENST00000373939	3'UTR	0	8.13354	6.56722	16	9.49896	9.11845	36.8969	51.4188					STX12	syntaxin 12 [Source:HGNC Symbol;Acc:11430]	protein_coding
chr1+:28149810-28149842	UUUACAG no CUGUAAA kshv-miR-K12-1(7mer-A1)	0.9449	0.7623	ENSG00000117758	ENST00000373939	3'UTR	0	0	2.18907	3	7.9158	6.07896	30.1884	41.7777			x		STX12	syntaxin 12 [Source:HGNC Symbol;Acc:11430]	protein_coding
chr1+:28150147-28150200	UCACAUU vertebrate AAUGUGA hsa-miR-23a(7mer-m8) hsa-miR-23b(7mer-m8) hsa-miR-130a*(7mer-m8) kshv-miR-K12-3(7mer-A1) hsa-miR-23c(7mer-m8)	0.2126	0.7242	ENSG00000117758	ENST00000373939	3'UTR	0	0	0	1	12.6653	12.1579	43.6054	35.3504					STX12	syntaxin 12 [Source:HGNC Symbol;Acc:11430]	protein_coding
chr1+:28150214-28150277	AAGUGCA weakly UGCACUU hsa-miR-519c-3p(7mer-m8) hsa-miR-519b-3p(7mer-m8) hsa-miR-519a(7mer-m8)	0.5101	0.8589	ENSG00000117758	ENST00000373939	3'UTR	73.3862	109.803	21.8907	25	18.9979	13.6777	16.7713	9.64102					STX12	syntaxin 12 [Source:HGNC Symbol;Acc:11430]	protein_coding
chr1+:28165347-28165363|28167524-28167574	AAAGUGC vertebrate GCACUUU hsa-miR-17(7mer-m8) hsa-miR-20a(7mer-m8) hsa-miR-93(7mer-m8) hsa-miR-106a(7mer-m8) hsa-miR-106b(7mer-m8) hsa-miR-20b(7mer-m8) hsa-miR-526b*(7mer-m8) hsa-miR-519d(7mer-m8)	0.4573	0.9885	ENSG00000117751	ENST00000373931	5'UTR	26.2094	40.6677	2.18907	4	1.58316	3.03948	10.0628	9.64102	x				PPP1R8	protein phosphatase 1, regulatory (inhibitor) subunit 8 [Source:HGNC Symbol;Acc:9296]	protein_coding
chr1+:28176825-28176913	UUUACAG no CUGUAAA kshv-miR-K12-1(7mer-A1)	0.3502	1	ENSG00000117751	ENST00000373931	CDS	5.24187	0	8.7563	14	1.58316	0	0	0					PPP1R8	protein phosphatase 1, regulatory (inhibitor) subunit 8 [Source:HGNC Symbol;Acc:9296]	protein_coding
chr1+:28177024-28177093	ACCGCAC no	0.9865	1	ENSG00000117751	ENST00000373931	3'UTR	5.24187	24.4006	19.7017	38	36.4127	44.0725	67.0853	54.6324					PPP1R8	protein phosphatase 1, regulatory (inhibitor) subunit 8 [Source:HGNC Symbol;Acc:9296]	protein_coding
chr1+:28177561-28177601	AAACCUG no CAGGUU ebv-miR-BHRF1-1(6mer) hsa-miR-490-3p(6mer) hsa-miR-649(6mer)	0.5455	1	ENSG00000117751	ENST00000373931	3'UTR	0	0	2.18907	5	1.58316	4.55922	20.1256	19.282					PPP1R8	protein phosphatase 1, regulatory (inhibitor) subunit 8 [Source:HGNC Symbol;Acc:9296]	protein_coding
chr1+:28562678-28562718	CACUGCC no	0.8847	1	ENSG00000130770	ENST00000465645	protein_coding	20.9675	36.6009	0	2	20.5811	18.2369	13.4171	0					ATPIF1	ATPase inhibitory factor 1 [Source:HGNC Symbol;Acc:871]	protein_coding
chr1+:28598279-28598349	UAGUGCA vertebrate UGCACUA hsa-miR-130a(7mer-A1) hsa-miR-301a(7mer-A1) hsa-miR-130b(7mer-A1) hsa-miR-454(7mer-A1) hsa-miR-301b(7mer-A1) hsa-miR-4295(7mer-A1) hsa-miR-3666(7mer-A1)	0.6402	0.7872	ENSG00000130766	ENST00000253063	CDS	15.7256	32.5342	2.18907	2	3.16632	0	0	0					SESN2	sestrin 2 [Source:HGNC Symbol;Acc:20746]	protein_coding
chr1+:28607266-28607319	CACGGAG no	0.3037	0.7762	ENSG00000130766	ENST00000253063	CDS,3'UTR	0	20.3339	4.37815	6	1.58316	0	0	0					SESN2	sestrin 2 [Source:HGNC Symbol;Acc:20746]	protein_coding
chr1+:28607468-28607521	CCCAGAG no CUCUGG hsa-miR-520a-5p(6mer-m8) hsa-miR-525-5p(6mer-m8) UCUGGG hsa-miR-1912(6mer-m8)	0.6838	0.5675	ENSG00000130766	ENST00000253063	3'UTR	20.9675	28.4674	2.18907	3	0	0	0	0					SESN2	sestrin 2 [Source:HGNC Symbol;Acc:20746]	protein_coding
chr1+:28607724-28607808	GUGAAUG weakly CAUUCAC hsa-miR-1257(7mer-m8)	0.8006	0.6642	ENSG00000130766	ENST00000253063	3'UTR	0	0	0	3	4.74948	3.03948	10.0628	25.7094					SESN2	sestrin 2 [Source:HGNC Symbol;Acc:20746]	protein_coding
chr1+:28823102-28823182	AGUGCUA no AGCACU hsa-miR-302a(6mer-m8) hsa-miR-302b(6mer-m8) hsa-miR-302c(6mer-m8) hsa-miR-302d(6mer-m8) hsa-miR-372(6mer-m8) hsa-miR-373(6mer-m8) hsa-miR-512-3p(6mer) hsa-miR-520e(6mer-m8) hsa-miR-520f(6mer) hsa-miR-520a-3p(6mer-m8) hsa-miR-520b(6mer-m8) hsa-miR-520c-3p(6mer-m8) hsa-miR-520d-3p(6mer-m8) hsa-miR-302e(6mer-m8)	0.0344	0.9673	ENSG00000204138	ENST00000373839	3'UTR	0	4.06677	6.56722	6	0	0	6.70853	16.0684					PHACTR4	phosphatase and actin regulator 4 [Source:HGNC Symbol;Acc:25793]	protein_coding
chr1+:28823158-28823222	ACAUUCA vertebrate UGAAUGU hsa-miR-181a(7mer-m8) hsa-miR-181b(7mer-m8) hsa-miR-181c(7mer-m8) hsa-miR-181d(7mer-m8) hsa-miR-4262(7mer-m8)	0.5902	0.9494	ENSG00000204138	ENST00000373839	3'UTR	0	0	13.1344	3	1.58316	1.51974	0	0					PHACTR4	phosphatase and actin regulator 4 [Source:HGNC Symbol;Acc:25793]	protein_coding
chr1+:28823182-28823272	UGCAGCA vertebrate UGCUGCA hsa-miR-103(7mer-A1) hsa-miR-107(7mer-A1)	0.0437	0.7569	ENSG00000204138	ENST00000373839	3'UTR	0	0	10.9454	11	0	0	0	0					PHACTR4	phosphatase and actin regulator 4 [Source:HGNC Symbol;Acc:25793]	protein_coding
chr1+:28824584-28824620	AGAAUAU no UAUUCU kshv-miR-K12-4-3p(6mer)	0.5396	0.9904	ENSG00000204138	ENST00000373839	3'UTR	0	0	4.37815	10	15.8316	34.954	144.233	125.333					PHACTR4	phosphatase and actin regulator 4 [Source:HGNC Symbol;Acc:25793]	protein_coding
chr1+:28824600-28824667	AGAAUAC no GUAUUCU kshv-miR-K12-4-3p(7mer-m8)	0.9778	0.9507	ENSG00000204138	ENST00000373839	3'UTR	0	4.06677	39.4033	22	64.9095	68.3884	419.283	485.265					PHACTR4	phosphatase and actin regulator 4 [Source:HGNC Symbol;Acc:25793]	protein_coding
chr1+:28825033-28825103	AUAGUGU no ACACUA hsa-miR-142-3p(6mer-m8)	0.9558	0.926	ENSG00000204138	ENST00000373839	3'UTR	0	0	4.37815	14	6.33264	6.07896	73.7938	83.5555					PHACTR4	phosphatase and actin regulator 4 [Source:HGNC Symbol;Acc:25793]	protein_coding
chr1+:28825089-28825158	AAAGUGA weakly UCACUUU hsa-miR-3609(7mer-m8)	0.9619	0.6815	ENSG00000204138	ENST00000373839	3'UTR	0	20.3339	52.5378	53	33.2463	33.4343	10.0628	6.42735					PHACTR4	phosphatase and actin regulator 4 [Source:HGNC Symbol;Acc:25793]	protein_coding
chr1+:28833189-28833232	UGUGCAA vertebrate UUGCACA hsa-miR-19a(7mer-A1) hsa-miR-19b(7mer-A1)	0.2714	0.9046	ENSG00000242125	ENST00000437681	processed_transcript	10.4837	24.4006	0	2	0	0	0	0					SNHG3	small nucleolar RNA host gene 3 (non-protein coding) [Source:HGNC Symbol;Acc:10118]	processed_transcript
chr1+:28835700-28835742	UAAAGUA weakly UACUUUA hsa-miR-559(7mer-A1) hsa-miR-548b-5p(7mer-A1) hsa-miR-548a-5p(7mer-A1) hsa-miR-548c-5p(7mer-A1) hsa-miR-548d-5p(7mer-A1) hsa-miR-548j(7mer-A1) hsa-miR-548k(7mer-A1) hsa-miR-548l(7mer-A1) hsa-miR-548h(7mer-A1) hsa-miR-548i(7mer-A1) hsa-miR-548w(7mer-A1) hsa-miR-548y(7mer-A1)	0.5028	0.983	ENSG00000242125	ENST00000437681	processed_transcript	20.9675	12.2003	4.37815	4	6.33264	4.55922	3.35426	0					SNHG3	small nucleolar RNA host gene 3 (non-protein coding) [Source:HGNC Symbol;Acc:10118]	processed_transcript
chr1+:28865488-28865539	AGAAAAC no GUUUUC hsa-miR-570(6mer)	0.2133	0.5178	ENSG00000180198	ENST00000398962	3'UTR	0	0	15.3235	24	26.9137	34.954	97.2737	93.1965					RCC1	regulator of chromosome condensation 1 [Source:HGNC Symbol;Acc:1913]	protein_coding
chr1+:29068921-29069004	ACUGUAG weakly CUACAGU kshv-miR-K12-2(7mer-m8) hsa-miR-1183(7mer-m8)	0.4034	1	ENSG00000198492	ENST00000373812	CDS	10.4837	4.06677	21.8907	28	186.813	208.205	291.821	302.085					YTHDF2	YTH domain family, member 2 [Source:HGNC Symbol;Acc:31675]	protein_coding
chr1+:29069208-29069263	AGGUGCA no GCACCU hsa-miR-18a(6mer-m8) hsa-miR-18b(6mer-m8) hsa-miR-764(6mer-m8)	0.756	0.9806	ENSG00000198492	ENST00000373812	CDS	20.9675	65.0683	8.7563	5	0	0	0	0					YTHDF2	YTH domain family, member 2 [Source:HGNC Symbol;Acc:31675]	protein_coding
chr1+:29319987-29320012	UGCAGUG no CACUGC hsa-miR-34a(6mer-m8) hsa-miR-34c-5p(6mer-m8) hsa-miR-449a(6mer-m8) hsa-miR-449b(6mer-m8) ACUGCA hsa-miR-17*(6mer-m8) hsa-miR-143*(6mer-m8)	0.8543	1	ENSG00000159023	ENST00000343067	CDS	10.4837	12.2003	6.56722	6	6.33264	6.07896	23.4799	35.3504					EPB41	erythrocyte membrane protein band 4.1 (elliptocytosis 1, RH-linked) [Source:HGNC Symbol;Acc:3377]	protein_coding
chr1+:29344777-29344832	UAAUGCU vertebrate AGCAUUA hsa-miR-155(7mer-m8) kshv-miR-K12-11(7mer-m8)	0.7344	0.9885	ENSG00000159023	ENST00000343067	CDS	0	0	19.7017	11	45.9116	27.3553	60.3768	89.9828					EPB41	erythrocyte membrane protein band 4.1 (elliptocytosis 1, RH-linked) [Source:HGNC Symbol;Acc:3377]	protein_coding
chr1+:29442301-29442315|29443330-29443369	GAUGGGA no	0.5789	1	ENSG00000159023	ENST00000343067	CDS,3'UTR	0	0	17.5126	8	3.16632	3.03948	73.7938	28.9231					EPB41	erythrocyte membrane protein band 4.1 (elliptocytosis 1, RH-linked) [Source:HGNC Symbol;Acc:3377]	protein_coding
chr1+:29443999-29444040	UUCACAG vertebrate CUGUGAA hsa-miR-27a(7mer-A1) hsa-miR-27b(7mer-A1) hsa-miR-513a-5p(7mer-A1)	0.8401	0.653	ENSG00000159023	ENST00000343067	3'UTR	31.4512	65.0683	70.0504	34	7.9158	10.6382	40.2512	61.0598					EPB41	erythrocyte membrane protein band 4.1 (elliptocytosis 1, RH-linked) [Source:HGNC Symbol;Acc:3377]	protein_coding
chr1+:32502537-32502590	UUCAAGU vertebrate ACUUGAA hsa-miR-26a(7mer-A1) hsa-miR-26b(7mer-A1) hsa-miR-1297(7mer-A1)	0.0957	0.5589	ENSG00000121774	ENST00000327300	CDS	0	0	21.8907	2	0	0	0	0					KHDRBS1	KH domain containing, RNA binding, signal transduction associated 1 [Source:HGNC Symbol;Acc:18116]	protein_coding
chr1+:32541321-32541379	UGUAGUG vertebrate CACUACA hsa-miR-142-3p(7mer-A1)	0.7856	1	ENSG00000121775	ENST00000487305	protein_coding	36.6931	65.0683	85.3739	44	140.901	109.421	211.319	205.675					TMEM39B	transmembrane protein 39B [Source:HGNC Symbol;Acc:25510]	protein_coding
chr1+:32626255-32626304|32627547-32627583	AGUGUUA no UAACAC hsa-miR-3152(6mer) AACACU kshv-miR-K12-10a(6mer) hsa-miR-4255(6mer) hsa-miR-3659(6mer-m8)	0.1404	0.9042	ENSG00000025800	ENST00000373625	CDS	0	12.2003	4.37815	2	9.49896	16.7172	10.0628	6.42735					KPNA6	karyopherin alpha 6 (importin alpha 7) [Source:HGNC Symbol;Acc:6399]	protein_coding
chr1+:32636707-32636786	UAGUGUA weakly UACACUA hsa-miR-4280(7mer-A1)	0.4967	0.6785	ENSG00000025800	ENST00000373625	3'UTR	36.6931	40.6677	45.9706	52	41.1621	39.5133	36.8969	54.6324					KPNA6	karyopherin alpha 6 (importin alpha 7) [Source:HGNC Symbol;Acc:6399]	protein_coding
chr1+:32637033-32637082	GUGCAAA vertebrate UUUGCAC hsa-miR-19a(7mer-m8) hsa-miR-19b(7mer-m8)	0.8883	0.9897	ENSG00000025800	ENST00000373625	3'UTR	10.4837	24.4006	10.9454	26	408.455	395.133	157.65	157.47					KPNA6	karyopherin alpha 6 (importin alpha 7) [Source:HGNC Symbol;Acc:6399]	protein_coding
chr1+:32637355-32637406	GUAAACA vertebrate UGUUUAC hsa-miR-30a(7mer-m8) hsa-miR-30c(7mer-m8) hsa-miR-30d(7mer-m8) hsa-miR-30b(7mer-m8) hsa-miR-30e(7mer-m8)	0.9597	0.9945	ENSG00000025800	ENST00000373625	3'UTR	5.24187	4.06677	2.18907	8	26.9137	30.3948	10.0628	12.8547					KPNA6	karyopherin alpha 6 (importin alpha 7) [Source:HGNC Symbol;Acc:6399]	protein_coding
chr1+:32638902-32638930	GUCUUAC no GUAAGAC hsa-miR-200c*(7mer-m8) hsa-miR-550a*(7mer-m8)	0.9914	1	ENSG00000025800	ENST00000373625	3'UTR	0	0	2.18907	0	52.2443	33.4343	3.35426	9.64102					KPNA6	karyopherin alpha 6 (importin alpha 7) [Source:HGNC Symbol;Acc:6399]	protein_coding
chr1+:32641908-32641969	UUUAUUG no	0.9486	0.9149	ENSG00000025800	ENST00000373625	3'UTR	0	0	2.18907	1	1.58316	6.07896	73.7938	89.9828					KPNA6	karyopherin alpha 6 (importin alpha 7) [Source:HGNC Symbol;Acc:6399]	protein_coding
chr1+:32660903-32660956	AGUGCCA no UGGCAC hsa-miR-1227(6mer) GGCACU hsa-miR-371-3p(6mer) hsa-miR-515-3p(6mer) hsa-miR-519e(6mer) hsa-miR-33b*(6mer) hsa-miR-1909*(6mer-m8)	0.2329	0.7095	ENSG00000084652	ENST00000373609	3'UTR	0	16.2671	2.18907	7	0	0	0	0					TXLNA	taxilin alpha [Source:HGNC Symbol;Acc:30685]	protein_coding
chr1+:32661905-32661990	AUUGCAC vertebrate GUGCAAU hsa-miR-25(7mer-m8) hsa-miR-32(7mer-m8) hsa-miR-92a(7mer-m8) hsa-miR-363(7mer-m8) hsa-miR-367(7mer-m8) hsa-miR-92b(7mer-m8)	0.9447	0.8089	ENSG00000084652	ENST00000373609	3'UTR	152.014	211.472	50.3487	68	42.7453	34.954	20.1256	19.282					TXLNA	taxilin alpha [Source:HGNC Symbol;Acc:30685]	protein_coding
chr1+:32662597-32662668	UUCACAG vertebrate CUGUGAA hsa-miR-27a(7mer-A1) hsa-miR-27b(7mer-A1) hsa-miR-513a-5p(7mer-A1)	0.0881	0.9567	ENSG00000084652	ENST00000373609	3'UTR	0	0	48.1596	39	0	1.51974	23.4799	3.21367					TXLNA	taxilin alpha [Source:HGNC Symbol;Acc:30685]	protein_coding
chr1+:32663074-32663148	UGUAGUG vertebrate CACUACA hsa-miR-142-3p(7mer-A1)	0.7539	0.8046	ENSG00000084652	ENST00000373609	3'UTR	41.935	69.1351	19.7017	49	56.9937	53.1909	127.462	86.7692					TXLNA	taxilin alpha [Source:HGNC Symbol;Acc:30685]	protein_coding
chr1+:32663437-32663503	AAAGUGC vertebrate GCACUUU hsa-miR-17(7mer-m8) hsa-miR-20a(7mer-m8) hsa-miR-93(7mer-m8) hsa-miR-106a(7mer-m8) hsa-miR-106b(7mer-m8) hsa-miR-20b(7mer-m8) hsa-miR-526b*(7mer-m8) hsa-miR-519d(7mer-m8)	0.1314	0.9797	ENSG00000084652	ENST00000373609	3'UTR	10.4837	4.06677	4.37815	6	0	0	0	0					TXLNA	taxilin alpha [Source:HGNC Symbol;Acc:30685]	protein_coding
chr1+:32692003-32692066	UUAGAGU no CUCUAA hsa-miR-1303(6mer)	0.4177	0.9929	ENSG00000084623	ENST00000373586	CDS	26.2094	44.7345	21.8907	21	33.2463	34.954	30.1884	38.5641					EIF3I	eukaryotic translation initiation factor 3, subunit I [Source:HGNC Symbol;Acc:3272]	protein_coding
chr1+:32694183-32694210|32694327-32694373	AAGAGUU no AACUCU hsa-let-7c*(6mer)	0.0733	1	ENSG00000084623	ENST00000373586	CDS	0	8.13354	0	0	6.33264	3.03948	0	0					EIF3I	eukaryotic translation initiation factor 3, subunit I [Source:HGNC Symbol;Acc:3272]	protein_coding
chr1+:32694360-32694417|32694735-32694749	GGGCAGC no GCUGCC hsa-miR-885-3p(6mer) CUGCCC hsa-miR-486-3p(6mer-m8)	0.8191	0.7823	ENSG00000084623	ENST00000373586	CDS	15.7256	24.4006	6.56722	8	0	0	0	0					EIF3I	eukaryotic translation initiation factor 3, subunit I [Source:HGNC Symbol;Acc:3272]	protein_coding
chr1+:32697038-32697091	GGCUCAG vertebrate CUGAGCC hsa-miR-24(7mer-m8)	0.3397	0.678	ENSG00000084623	ENST00000373586	3'UTR	36.6931	16.2671	13.1344	2	0	0	0	0					EIF3I	eukaryotic translation initiation factor 3, subunit I [Source:HGNC Symbol;Acc:3272]	protein_coding
chr1+:32751415-32751483	AAGGUGC vertebrate GCACCUU hsa-miR-18a(7mer-m8) hsa-miR-18b(7mer-m8)	0.1038	0.8833	ENSG00000182866	ENST00000373562	3'UTR	57.6606	56.9348	0	0	0	0	0	0					LCK	lymphocyte-specific protein tyrosine kinase [Source:HGNC Symbol;Acc:6524]	protein_coding
chr1+:32768252-32768325	AGCAGCA vertebrate UGCUGCU hsa-miR-15a(7mer-m8) hsa-miR-16(7mer-m8) hsa-miR-15b(7mer-m8) hsa-miR-195(7mer-m8) hsa-miR-424(7mer-m8) hsa-miR-497(7mer-m8)	0.1156	0.994	ENSG00000116478	ENST00000373548	CDS	26.2094	44.7345	15.3235	10	0	0	13.4171	3.21367					HDAC1	histone deacetylase 1 [Source:HGNC Symbol;Acc:4852]	protein_coding
chr1+:32796475-32796509|32797074-32797107	AAGUAGU no ACUACU hsa-miR-199a-3p(6mer-m8) hsa-miR-199b-3p(6mer-m8) hsa-miR-1244(6mer) hsa-miR-3129(6mer-m8) CUACUU hsa-miR-562(6mer)	0.5733	0.9023	ENSG00000116478	ENST00000373548	CDS	0	20.3339	10.9454	6	9.49896	4.55922	3.35426	6.42735					HDAC1	histone deacetylase 1 [Source:HGNC Symbol;Acc:4852]	protein_coding
chr1+:33146163-33146220	AGAGUAA no	0.8934	1	ENSG00000162521	ENST00000458695	3'UTR	0	0	15.3235	8	0	0	6.70853	0					RBBP4	retinoblastoma binding protein 4 [Source:HGNC Symbol;Acc:9887]	protein_coding
chr1+:33147428-33147469	AGAAAUA no AUUUCU hsa-miR-539(6mer-m8)	0.7455	0.8958	ENSG00000162521	ENST00000458695	3'UTR	0	0	17.5126	18	3.16632	0	0	0					RBBP4	retinoblastoma binding protein 4 [Source:HGNC Symbol;Acc:9887]	protein_coding
chr1+:33322837-33322865	AGAAUAC no GUAUUCU kshv-miR-K12-4-3p(7mer-m8)	0.9688	0.9996	ENSG00000116497	ENST00000373475	3'UTR	0	0	13.1344	11	33.2463	22.7961	73.7938	73.9145					S100PBP	S100P binding protein [Source:HGNC Symbol;Acc:25768]	protein_coding
chr1+:33960175-33960228	GCGGUCA no GACCGC kshv-miR-K12-3*(6mer-m8)	0.8113	1	ENSG00000121903	ENST00000373411	CDS	0	0	0	1	1.58316	0	16.7713	28.9231					ZSCAN20	zinc finger and SCAN domain containing 20 [Source:HGNC Symbol;Acc:13093]	protein_coding
chr1+:3545750-3545799	AAAAGUG weakly CACUUUU hsa-miR-548t(7mer-m8)	0.048	0.4597	ENSG00000158109	ENST00000378344	3'UTR	15.7256	24.4006	4.37815	6	9.49896	16.7172	0	0					TPRG1L	tumor protein p63 regulated 1-like [Source:HGNC Symbol;Acc:27007]	protein_coding
chr1+:3545842-3545873	GUCUUAC no GUAAGAC hsa-miR-200c*(7mer-m8) hsa-miR-550a*(7mer-m8)	0.9837	1	ENSG00000158109	ENST00000378344	3'UTR	0	0	0	0	123.486	120.06	6.70853	6.42735					TPRG1L	tumor protein p63 regulated 1-like [Source:HGNC Symbol;Acc:27007]	protein_coding
chr1+:3545947-3546028	AAAGUGC vertebrate GCACUUU hsa-miR-17(7mer-m8) hsa-miR-20a(7mer-m8) hsa-miR-93(7mer-m8) hsa-miR-106a(7mer-m8) hsa-miR-106b(7mer-m8) hsa-miR-20b(7mer-m8) hsa-miR-526b*(7mer-m8) hsa-miR-519d(7mer-m8)	0.2157	0.638	ENSG00000158109	ENST00000378344	3'UTR	78.6281	32.5342	17.5126	35	56.9937	62.3094	53.6682	48.2051					TPRG1L	tumor protein p63 regulated 1-like [Source:HGNC Symbol;Acc:27007]	protein_coding
chr1+:3546306-3546349	AGGAACC weakly GGUUCCU hsa-miR-3914(7mer-m8)	0.3535	0.9277	ENSG00000158109	ENST00000378344	3'UTR	41.935	40.6677	6.56722	2	0	0	0	0					TPRG1L	tumor protein p63 regulated 1-like [Source:HGNC Symbol;Acc:27007]	protein_coding
chr1+:36029370-36029407	AGAUGUG weakly CACAUCU hsa-miR-576-3p(7mer-m8)	0	1	ENSG00000020129	ENST00000373243	CDS	0	0	4.37815	2	0	1.51974	16.7713	9.64102					NCDN	neurochondrin [Source:HGNC Symbol;Acc:17597]	protein_coding
chr1+:36385884-36385935	AGUGCCA no UGGCAC hsa-miR-1227(6mer) GGCACU hsa-miR-371-3p(6mer) hsa-miR-515-3p(6mer) hsa-miR-519e(6mer) hsa-miR-33b*(6mer) hsa-miR-1909*(6mer-m8)	0.6415	0.8595	ENSG00000092847	ENST00000373204	3'UTR	20.9675	32.5342	26.2689	33	1.58316	4.55922	0	0					EIF2C1	eukaryotic translation initiation factor 2C, 1 [Source:HGNC Symbol;Acc:3262]	protein_coding
chr1+:36386168-36386239	AAAGUGC vertebrate GCACUUU hsa-miR-17(7mer-m8) hsa-miR-20a(7mer-m8) hsa-miR-93(7mer-m8) hsa-miR-106a(7mer-m8) hsa-miR-106b(7mer-m8) hsa-miR-20b(7mer-m8) hsa-miR-526b*(7mer-m8) hsa-miR-519d(7mer-m8)	0.6198	0.5868	ENSG00000092847	ENST00000373204	3'UTR	10.4837	20.3339	13.1344	21	20.5811	24.3159	6.70853	9.64102					EIF2C1	eukaryotic translation initiation factor 2C, 1 [Source:HGNC Symbol;Acc:3262]	protein_coding
chr1+:3640024-3640033|3643678-3643738	UACAGGA weakly CCUGUA kshv-miR-K12-1(6mer-m8)	0.9928	0.9976	ENSG00000078900	ENST00000378295	CDS	0	0	13.1344	9	137.735	133.737	214.673	199.248					TP73	tumor protein p73 [Source:HGNC Symbol;Acc:12003]	protein_coding
chr1+:36645954-36646025	AAGGUGC vertebrate GCACCUU hsa-miR-18a(7mer-m8) hsa-miR-18b(7mer-m8)	0.8786	0.9108	ENSG00000116871	ENST00000316156	3'UTR	262.094	549.014	262.689	232	194.729	155.014	20.1256	25.7094					MAP7D1	MAP7 domain containing 1 [Source:HGNC Symbol;Acc:25514]	protein_coding
chr1+:36646065-36646116	GGGGGAG weakly CUCCCCC kshv-miR-K12-12(7mer-m8)	0.5039	0.6396	ENSG00000116871	ENST00000316156	3'UTR	10.4837	0	17.5126	12	14.2484	10.6382	342.135	408.136					MAP7D1	MAP7 domain containing 1 [Source:HGNC Symbol;Acc:25514]	protein_coding
chr1+:36646262-36646305	UUACAGU weakly ACUGUAA hsa-miR-582-5p(7mer-A1)	0.8949	0.9751	ENSG00000116871	ENST00000316156	3'UTR	5.24187	4.06677	0	0	0	4.55922	26.8341	35.3504					MAP7D1	MAP7 domain containing 1 [Source:HGNC Symbol;Acc:25514]	protein_coding
chr1+:38266417-38266463	AGUGUUA no UAACAC hsa-miR-3152(6mer) AACACU kshv-miR-K12-10a(6mer) hsa-miR-4255(6mer) hsa-miR-3659(6mer-m8)	0.2518	0.5412	ENSG00000185090	ENST00000373045	3'UTR	0	0	0	4	0	0	13.4171	22.4957					MANEAL	mannosidase, endo-alpha-like [Source:HGNC Symbol;Acc:26452]	protein_coding
chr1+:39463932-39463983	GUGAGUG no ACUCAC hsa-miR-3174(6mer-m8)	0.7351	0.9898	ENSG00000174574	ENST00000432648	CDS	10.4837	16.2671	15.3235	29	0	4.55922	13.4171	28.9231					AKIRIN1	akirin 1 [Source:HGNC Symbol;Acc:25744]	protein_coding
chr1+:39469754-39469814	AAAAGUG weakly CACUUUU hsa-miR-548t(7mer-m8)	0.4065	0.6425	ENSG00000174574	ENST00000432648	3'UTR	15.7256	16.2671	2.18907	5	0	0	3.35426	3.21367					AKIRIN1	akirin 1 [Source:HGNC Symbol;Acc:25744]	protein_coding
chr1+:39470115-39470174	UUCACAG vertebrate CUGUGAA hsa-miR-27a(7mer-A1) hsa-miR-27b(7mer-A1) hsa-miR-513a-5p(7mer-A1)	0.1145	0.9849	ENSG00000174574	ENST00000432648	3'UTR	47.1769	44.7345	6.56722	7	0	0	0	0					AKIRIN1	akirin 1 [Source:HGNC Symbol;Acc:25744]	protein_coding
chr1+:39471552-39471590	UCACAGU vertebrate ACUGUGA hsa-miR-27a(7mer-m8) hsa-miR-27b(7mer-m8) hsa-miR-128(7mer-A1) hsa-miR-3681*(7mer-A1)	0.7847	0.943	ENSG00000174574	ENST00000432648	3'UTR	89.1118	158.604	54.7269	34	6.33264	6.07896	6.70853	6.42735					AKIRIN1	akirin 1 [Source:HGNC Symbol;Acc:25744]	protein_coding
chr1+:39749822-39749857|39750004-39750051	UGAAGUG weakly CACUUCA hsa-miR-573(7mer-m8) hsa-miR-3616-5p(7mer-m8) hsa-miR-3647-5p(7mer-m8)	0.7857	0.8892	ENSG00000127603	ENST00000372900	CDS	15.7256	20.3339	13.1344	19	144.068	150.454	93.9194	44.9914					MACF1	microtubule-actin crosslinking factor 1 [Source:HGNC Symbol;Acc:13664]	protein_coding
chr1+:40536101-40536152	ACCAGGC no GCCUGGU kshv-miR-K12-12*(7mer-m8) hsa-miR-1911*(7mer-m8)	0.2336	0.6284	ENSG00000131236	ENST00000372797	CDS	0	4.06677	19.7017	13	0	0	0	3.21367				x	CAP1	CAP, adenylate cyclase-associated protein 1 (yeast) [Source:HGNC Symbol;Acc:20040]	protein_coding
chr1+:40536573-40536649	ACAUUCA vertebrate UGAAUGU hsa-miR-181a(7mer-m8) hsa-miR-181b(7mer-m8) hsa-miR-181c(7mer-m8) hsa-miR-181d(7mer-m8) hsa-miR-4262(7mer-m8)	0.755	1	ENSG00000131236	ENST00000372797	CDS	0	0	41.5924	36	0	0	0	0		x			CAP1	CAP, adenylate cyclase-associated protein 1 (yeast) [Source:HGNC Symbol;Acc:20040]	protein_coding
chr1+:40654794-40654850	ACAUUCA vertebrate UGAAUGU hsa-miR-181a(7mer-m8) hsa-miR-181b(7mer-m8) hsa-miR-181c(7mer-m8) hsa-miR-181d(7mer-m8) hsa-miR-4262(7mer-m8)	0.4366	0.7299	ENSG00000117000	ENST00000372771	CDS	0	0	15.3235	18	1.58316	1.51974	10.0628	6.42735		x			RLF	rearranged L-myc fusion [Source:HGNC Symbol;Acc:10025]	protein_coding
chr1+:40702635-40702669	UUUGUUU no AAACAAA ebv-miR-BART19-3p(7mer-m8)	0.9931	0.7342	ENSG00000117000	ENST00000372771	CDS	0	0	0	0	34.8295	27.3553	0	0					RLF	rearranged L-myc fusion [Source:HGNC Symbol;Acc:10025]	protein_coding
chr1+:40705894-40705959	UUGUUGU no	0.4212	0.9931	ENSG00000117000	ENST00000372771	CDS	0	0	6.56722	3	3.16632	12.1579	30.1884	32.1367					RLF	rearranged L-myc fusion [Source:HGNC Symbol;Acc:10025]	protein_coding
chr1+:40706347-40706429	AGCACCA vertebrate UGGUGCU hsa-miR-29a(7mer-m8) hsa-miR-29b(7mer-m8) hsa-miR-29c(7mer-m8)	0.0518	0.9149	ENSG00000117000	ENST00000372771	3'UTR	5.24187	4.06677	4.37815	0	1.58316	4.55922	0	0					RLF	rearranged L-myc fusion [Source:HGNC Symbol;Acc:10025]	protein_coding
chr1+:40706447-40706531	UUCAAGU vertebrate ACUUGAA hsa-miR-26a(7mer-A1) hsa-miR-26b(7mer-A1) hsa-miR-1297(7mer-A1)	0.8901	0.9967	ENSG00000117000	ENST00000372771	3'UTR	5.24187	0	6.56722	9	74.4085	65.3489	23.4799	32.1367					RLF	rearranged L-myc fusion [Source:HGNC Symbol;Acc:10025]	protein_coding
chr1+:40706510-40706560	UGUAGUG vertebrate CACUACA hsa-miR-142-3p(7mer-A1)	0.7771	0.6062	ENSG00000117000	ENST00000372771	3'UTR	36.6931	32.5342	28.458	14	44.3285	31.9146	36.8969	22.4957					RLF	rearranged L-myc fusion [Source:HGNC Symbol;Acc:10025]	protein_coding
chr1+:40758253-40758305	UAAUGCC vertebrate GGCAUUA hsa-miR-365(7mer-A1)	0.6133	0.8113	ENSG00000084073	ENST00000372759	CDS	0	4.06677	4.37815	3	4.74948	10.6382	36.8969	38.5641					ZMPSTE24	zinc metallopeptidase (STE24 homolog, S. cerevisiae) [Source:HGNC Symbol;Acc:12877]	protein_coding
chr1+:40887939-40887970	UACAACA no	0.8605	0.6384	ENSG00000084070	ENST00000372718	3'UTR	10.4837	12.2003	0	2	1.58316	1.51974	0	0					SMAP2	small ArfGAP2 [Source:HGNC Symbol;Acc:25082]	protein_coding
chr1+:40887939-40888016	GAUGGCU no AGCCAU hsa-miR-135a(6mer) hsa-miR-135b(6mer)	0.847	0.8548	ENSG00000084070	ENST00000372718	3'UTR	0	0	13.1344	14	11.0821	6.07896	16.7713	61.0598					SMAP2	small ArfGAP2 [Source:HGNC Symbol;Acc:25082]	protein_coding
chr1+:40887978-40888024	AAGGUGC vertebrate GCACCUU hsa-miR-18a(7mer-m8) hsa-miR-18b(7mer-m8)	0.6218	0.8937	ENSG00000084070	ENST00000372718	3'UTR	10.4837	4.06677	2.18907	1	0	0	0	0					SMAP2	small ArfGAP2 [Source:HGNC Symbol;Acc:25082]	protein_coding
chr1+:40928509-40928542	AAGGUGA no UCACCUU ebv-miR-BART5(7mer-m8)	0.9859	0.8602	ENSG00000187801	ENST00000484445	protein_coding	0	4.06677	0	1	224.809	206.685	0	0					ZNF643	zinc finger protein 643 [Source:HGNC Symbol;Acc:28053]	protein_coding
chr1+:40960979-40961012	AAGGUGA no UCACCUU ebv-miR-BART5(7mer-m8)	0.9739	0.8771	ENSG00000187815	ENST00000372706	CDS	0	0	0	1	37.9958	31.9146	0	0					ZNF642	zinc finger protein 642 [Source:HGNC Symbol;Acc:24708]	protein_coding
chr1+:41013242-41013277	CAUGAUU no AUCAUG hsa-miR-433(6mer-m8)	0.5039	0.9429	ENSG00000117010	ENST00000372699	3'UTR	0	0	0	5	47.4948	44.0725	0	0					ZNF684	zinc finger protein 684 [Source:HGNC Symbol;Acc:28418]	protein_coding
chr1+:41013745-41013792	AGAAUAC no GUAUUCU kshv-miR-K12-4-3p(7mer-m8)	0.4866	0.9712	ENSG00000117010	ENST00000372699	3'UTR	0	0	15.3235	13	0	0	0	0				x	ZNF684	zinc finger protein 684 [Source:HGNC Symbol;Acc:28418]	protein_coding
chr1+:41236586-41236668	UGUAGUG vertebrate CACUACA hsa-miR-142-3p(7mer-A1)	0.3318	0.8988	ENSG00000066136	ENST00000372652	3'UTR	723.378	1093.96	201.395	236	77.5748	98.7832	110.691	128.547					NFYC	nuclear transcription factor Y, gamma [Source:HGNC Symbol;Acc:7806]	protein_coding
chr1+:41236672-41236735	GAGAAAA no UUUCUC hsa-miR-539(6mer)	0.1125	0.2954	ENSG00000066136	ENST00000372652	3'UTR	0	8.13354	0	1	0	0	0	0					NFYC	nuclear transcription factor Y, gamma [Source:HGNC Symbol;Acc:7806]	protein_coding
chr1+:42926020-42926062	AUUGCAC vertebrate GUGCAAU hsa-miR-25(7mer-m8) hsa-miR-32(7mer-m8) hsa-miR-92a(7mer-m8) hsa-miR-363(7mer-m8) hsa-miR-367(7mer-m8) hsa-miR-92b(7mer-m8)	0.8999	0.9942	ENSG00000127125	ENST00000455780	3'UTR	10.4837	0	6.56722	2	58.5769	53.1909	10.0628	12.8547					PPCS	phosphopantothenoylcysteine synthetase [Source:HGNC Symbol;Acc:25686]	protein_coding
chr1+:43148134-43148203	UGAUGGU no ACCAUCA kshv-miR-K12-6-3p(7mer-A1)	0.0989	0.7745	ENSG00000065978	ENST00000321358	5'UTR	0	4.06677	10.9454	14	0	0	3.35426	0				x	YBX1	Y box binding protein 1 [Source:HGNC Symbol;Acc:8014]	protein_coding
chr1+:43167841-43167888	ACCAGGC no GCCUGGU kshv-miR-K12-12*(7mer-m8) hsa-miR-1911*(7mer-m8)	0.5581	0.9798	ENSG00000065978	ENST00000436427	3'UTR	0	0	6.56722	8	0	0	10.0628	12.8547					YBX1	Y box binding protein 1 [Source:HGNC Symbol;Acc:8014]	protein_coding
chr1+:44088064-44088112	UACAGUG no CACUGU hsa-miR-128(6mer-m8) hsa-miR-3681*(6mer-m8) ACUGUA hsa-miR-139-5p(6mer-m8) hsa-miR-582-5p(6mer)	0.0125	0.3742	ENSG00000142949	ENST00000359947	3'UTR	0	0	6.56722	6	0	0	0	0					PTPRF	protein tyrosine phosphatase, receptor type, F [Source:HGNC Symbol;Acc:9670]	protein_coding
chr1+:44386513-44386598	UAGUGCA vertebrate UGCACUA hsa-miR-130a(7mer-A1) hsa-miR-301a(7mer-A1) hsa-miR-130b(7mer-A1) hsa-miR-454(7mer-A1) hsa-miR-301b(7mer-A1) hsa-miR-4295(7mer-A1) hsa-miR-3666(7mer-A1)	0.694	0.7405	ENSG00000126091	ENST00000262915	CDS	0	0	76.6176	48	1.58316	1.51974	0	0					ST3GAL3	ST3 beta-galactoside alpha-2,3-sialyltransferase 3 [Source:HGNC Symbol;Acc:10866]	protein_coding
chr1+:44443682-44443742	ACCAGCA weakly UGCUGGU hsa-miR-634(7mer-m8)	0.2801	0.7741	ENSG00000117410	ENST00000431876	3'UTR	0	16.2671	35.0252	31	3.16632	1.51974	0	0					ATP6V0B	ATPase, H+ transporting, lysosomal 21kDa, V0 subunit b [Source:HGNC Symbol;Acc:861]	protein_coding
chr1+:45116505-45116561	UGUGCAA vertebrate UUGCACA hsa-miR-19a(7mer-A1) hsa-miR-19b(7mer-A1)	0.3897	0.9899	ENSG00000187147	ENST00000355387	3'UTR	36.6931	0	2.18907	4	0	0	0	0					RNF220	ring finger protein 220 [Source:HGNC Symbol;Acc:25552]	protein_coding
chr1+:45233246-45233304	ACAUUCA vertebrate UGAAUGU hsa-miR-181a(7mer-m8) hsa-miR-181b(7mer-m8) hsa-miR-181c(7mer-m8) hsa-miR-181d(7mer-m8) hsa-miR-4262(7mer-m8)	0.2006	0.9823	ENSG00000142945	ENST00000372217	3'UTR	20.9675	12.2003	8.7563	12	1.58316	0	0	0					KIF2C	kinesin family member 2C [Source:HGNC Symbol;Acc:6393]	protein_coding
chr1+:45233289-45233349	UAAAGUA weakly UACUUUA hsa-miR-559(7mer-A1) hsa-miR-548b-5p(7mer-A1) hsa-miR-548a-5p(7mer-A1) hsa-miR-548c-5p(7mer-A1) hsa-miR-548d-5p(7mer-A1) hsa-miR-548j(7mer-A1) hsa-miR-548k(7mer-A1) hsa-miR-548l(7mer-A1) hsa-miR-548h(7mer-A1) hsa-miR-548i(7mer-A1) hsa-miR-548w(7mer-A1) hsa-miR-548y(7mer-A1)	0.2796	0.8561	ENSG00000142945	ENST00000372217	3'UTR	15.7256	12.2003	4.37815	9	0	0	10.0628	9.64102					KIF2C	kinesin family member 2C [Source:HGNC Symbol;Acc:6393]	protein_coding
chr1+:45238317-45238344	NA	0	0	ENSG00000243223	ENST00000474527	snoRNA_pseudogene	0	0	17.5126	9	175.731	162.612	164.359	167.111					AL592166.2		snoRNA_pseudogene
chr1+:45242394-45242446|45243285-45243304	AGUACAA no	0	1	ENSG00000142937	ENST00000396651	CDS	5.24187	0	2.18907	0	0	0	0	0					RPS8	small nucleolar RNA, C/D box 55 [Source:HGNC Symbol;Acc:10205]	protein_coding
chr1+:45481160-45481234	AUCAAUC no	0.4904	0.6915	ENSG00000126088	ENST00000246337	CDS,3'UTR	20.9675	0	2.18907	1	9.49896	15.1974	16.7713	22.4957					UROD	uroporphyrinogen decarboxylase [Source:HGNC Symbol;Acc:12591]	protein_coding
chr1+:45976151-45976228	UUAGUGU weakly ACACUA hsa-miR-142-3p(6mer-m8) CACUAA ebv-miR-BART1-5p(6mer-m8)	0.3058	0.914	ENSG00000132763	ENST00000401061	3'UTR	47.1769	36.6009	111.643	156	310.299	284.192	701.041	697.367					MMACHC	methylmalonic aciduria (cobalamin deficiency) cblC type, with homocystinuria [Source:HGNC Symbol;Acc:24525]	protein_coding
chr1+:45978647-45978690	NA	0	0	ENSG00000132763	ENST00000461062	protein_coding	0	0	0	0	0	6.07896	26.8341	41.7777					MMACHC	methylmalonic aciduria (cobalamin deficiency) cblC type, with homocystinuria [Source:HGNC Symbol;Acc:24525]	protein_coding
chr1+:46032258-46032319	AGCAGCA vertebrate UGCUGCU hsa-miR-15a(7mer-m8) hsa-miR-16(7mer-m8) hsa-miR-15b(7mer-m8) hsa-miR-195(7mer-m8) hsa-miR-424(7mer-m8) hsa-miR-497(7mer-m8)	0.2713	0.9948	ENSG00000117448	ENST00000372070	CDS	5.24187	36.6009	13.1344	16	30.08	39.5133	6.70853	12.8547					AKR1A1	aldo-keto reductase family 1, member A1 (aldehyde reductase) [Source:HGNC Symbol;Acc:380]	protein_coding
chr1+:46159061-46159117	GUAAGUG no	0.9694	0.7067	ENSG00000159596	ENST00000372025	CDS	15.7256	8.13354	8.7563	10	183.646	167.172	16.7713	22.4957					TMEM69	transmembrane protein 69 [Source:HGNC Symbol;Acc:28035]	protein_coding
chr1+:46330726-46330747	NA	0	0	ENSG00000086015	ENST00000468212	protein_coding	62.9025	28.4674	30.647	4	3.16632	10.6382	36.8969	61.0598					MAST2	microtubule associated serine/threonine kinase 2 [Source:HGNC Symbol;Acc:19035]	protein_coding
chr1+:46463396-46463464	AAAGUGA weakly UCACUUU hsa-miR-3609(7mer-m8)	0.7175	0.6588	ENSG00000086015	ENST00000361297	CDS	10.4837	20.3339	0	2	1.58316	0	3.35426	6.42735					MAST2	microtubule associated serine/threonine kinase 2 [Source:HGNC Symbol;Acc:19035]	protein_coding
chr1+:46501744-46501787	AGUGCAA vertebrate UUGCACU hsa-miR-130a(7mer-m8) hsa-miR-301a(7mer-m8) hsa-miR-130b(7mer-m8) hsa-miR-454(7mer-m8) hsa-miR-301b(7mer-m8) hsa-miR-4295(7mer-m8) hsa-miR-3666(7mer-m8)	0.5265	0.9762	ENSG00000086015	ENST00000361297	3'UTR	41.935	8.13354	0	0	0	0	0	0					MAST2	microtubule associated serine/threonine kinase 2 [Source:HGNC Symbol;Acc:19035]	protein_coding
chr1+:46775620-46775648	UGAUGCU no GCAUCA hsa-miR-1322(6mer-m8)	0.8078	0.9957	ENSG00000173660	ENST00000496387	protein_coding	0	0	0	0	60.1601	39.5133	0	3.21367					UQCRH	ubiquinol-cytochrome c reductase hinge protein [Source:HGNC Symbol;Acc:12590]	protein_coding
chr1+:47838744-47838777	UUACAGU weakly ACUGUAA hsa-miR-582-5p(7mer-A1)	0.9364	0.9975	ENSG00000162368	ENST00000371871	CDS	0	4.06677	6.56722	4	0	9.11845	30.1884	22.4957					CMPK1	cytidine monophosphate (UMP-CMP) kinase 1, cytosolic [Source:HGNC Symbol;Acc:18170]	protein_coding
chr1+:47842492-47842538	AUGUAGU no ACUACA hsa-miR-20b*(6mer-m8) CUACAU hsa-miR-3668(6mer)	0.1814	0.4399	ENSG00000162368	ENST00000371871	3'UTR	0	0	0	1	18.9979	10.6382	23.4799	25.7094					CMPK1	cytidine monophosphate (UMP-CMP) kinase 1, cytosolic [Source:HGNC Symbol;Acc:18170]	protein_coding
chr1+:47843125-47843164	AUAGAGU no	0.1155	0.5482	ENSG00000162368	ENST00000371871	3'UTR	0	4.06677	2.18907	2	15.8316	16.7172	20.1256	22.4957					CMPK1	cytidine monophosphate (UMP-CMP) kinase 1, cytosolic [Source:HGNC Symbol;Acc:18170]	protein_coding
chr1+:47843389-47843423	AAAGUGC vertebrate GCACUUU hsa-miR-17(7mer-m8) hsa-miR-20a(7mer-m8) hsa-miR-93(7mer-m8) hsa-miR-106a(7mer-m8) hsa-miR-106b(7mer-m8) hsa-miR-20b(7mer-m8) hsa-miR-526b*(7mer-m8) hsa-miR-519d(7mer-m8)	0.611	0.9046	ENSG00000162368	ENST00000371871	3'UTR	78.6281	73.2019	37.2143	21	4.74948	4.55922	0	0					CMPK1	cytidine monophosphate (UMP-CMP) kinase 1, cytosolic [Source:HGNC Symbol;Acc:18170]	protein_coding
chr1+:51736848-51736903	UGUGCAU no AUGCAC hsa-miR-517b(6mer-m8)	0.8345	0.9328	ENSG00000123091	ENST00000242719	CDS	31.4512	69.1351	8.7563	18	23.7474	15.1974	0	0					RNF11	ring finger protein 11 [Source:HGNC Symbol;Acc:10056]	protein_coding
chr1+:51737406-51737469	UUUUGUG weakly CACAAAA hsa-miR-2113(7mer-A1)	0.832	0.7798	ENSG00000123091	ENST00000242719	3'UTR	0	0	0	1	34.8295	39.5133	0	0					RNF11	ring finger protein 11 [Source:HGNC Symbol;Acc:10056]	protein_coding
chr1+:51737469-51737505	GUGCAAA vertebrate UUUGCAC hsa-miR-19a(7mer-m8) hsa-miR-19b(7mer-m8)	0.5683	0.9389	ENSG00000123091	ENST00000242719	3'UTR	5.24187	24.4006	4.37815	4	1.58316	1.51974	0	0					RNF11	ring finger protein 11 [Source:HGNC Symbol;Acc:10056]	protein_coding
chr1+:51738133-51738178	GUGCAAA vertebrate UUUGCAC hsa-miR-19a(7mer-m8) hsa-miR-19b(7mer-m8)	0.9753	0.9753	ENSG00000123091	ENST00000242719	3'UTR	10.4837	48.8013	8.7563	6	170.981	182.369	13.4171	28.9231					RNF11	ring finger protein 11 [Source:HGNC Symbol;Acc:10056]	protein_coding
chr1+:52250167-52250224	UUAGUGU weakly ACACUA hsa-miR-142-3p(6mer-m8) CACUAA ebv-miR-BART1-5p(6mer-m8)	0.2781	0.8263	ENSG00000117859	ENST00000371714	CDS	0	0	2.18907	2	11.0821	7.59871	16.7713	22.4957					OSBPL9	oxysterol binding protein-like 9 [Source:HGNC Symbol;Acc:16386]	protein_coding
chr1+:52552567-52552627	AAGUGCA weakly UGCACUU hsa-miR-519c-3p(7mer-m8) hsa-miR-519b-3p(7mer-m8) hsa-miR-519a(7mer-m8)	0.0145	0.3768	ENSG00000134717	ENST00000371599	3'UTR	5.24187	16.2671	2.18907	4	1.58316	0	0	0					BTF3L4	basic transcription factor 3-like 4 [Source:HGNC Symbol;Acc:30547]	protein_coding
chr1+:52553775-52553817	UAUUUUC no GAAAAUA ebv-miR-BART2-5p(7mer-A1)	0.9138	0.8356	ENSG00000134717	ENST00000371599	3'UTR	0	0	0	0	37.9958	27.3553	0	0					BTF3L4	basic transcription factor 3-like 4 [Source:HGNC Symbol;Acc:30547]	protein_coding
chr1+:52554090-52554153	UUUACAG no CUGUAAA kshv-miR-K12-1(7mer-A1)	0.1949	0.8599	ENSG00000134717	ENST00000371599	3'UTR	0	0	19.7017	17	0	3.03948	20.1256	16.0684					BTF3L4	basic transcription factor 3-like 4 [Source:HGNC Symbol;Acc:30547]	protein_coding
chr1+:52554208-52554247	UUGGGAC weakly GUCCCAA hsa-miR-1302(7mer-A1) hsa-miR-3122(7mer-m8) hsa-miR-4298(7mer-A1) hsa-miR-3913(7mer-m8)	0.9458	0.9917	ENSG00000134717	ENST00000371599	3'UTR	0	0	17.5126	11	0	0	0	0					BTF3L4	basic transcription factor 3-like 4 [Source:HGNC Symbol;Acc:30547]	protein_coding
chr1+:52555510-52555577	AAAGUGA weakly UCACUUU hsa-miR-3609(7mer-m8)	0.9123	0.9488	ENSG00000134717	ENST00000371599	3'UTR	68.1443	69.1351	59.105	76	77.5748	103.342	26.8341	35.3504					BTF3L4	basic transcription factor 3-like 4 [Source:HGNC Symbol;Acc:30547]	protein_coding
chr1+:52811918-52811981	AAAGUGC vertebrate GCACUUU hsa-miR-17(7mer-m8) hsa-miR-20a(7mer-m8) hsa-miR-93(7mer-m8) hsa-miR-106a(7mer-m8) hsa-miR-106b(7mer-m8) hsa-miR-20b(7mer-m8) hsa-miR-526b*(7mer-m8) hsa-miR-519d(7mer-m8)	0.8469	0.689	ENSG00000157077	ENST00000287727	3'UTR	41.935	28.4674	100.697	93	88.6569	97.2634	711.104	681.299					ZFYVE9	zinc finger, FYVE domain containing 9 [Source:HGNC Symbol;Acc:6775]	protein_coding
chr1+:52811972-52812015	UAGUGUU weakly AACACUA kshv-miR-K12-10a(7mer-A1) hsa-miR-4255(7mer-A1)	0.2348	0.7286	ENSG00000157077	ENST00000287727	3'UTR	0	0	21.8907	13	6.33264	1.51974	0	0					ZFYVE9	zinc finger, FYVE domain containing 9 [Source:HGNC Symbol;Acc:6775]	protein_coding
chr1+:52879588-52879660	UGUGGGA weakly CCCACA hsa-miR-299-3p(6mer-m8) hsa-miR-4296(6mer) hsa-miR-4322(6mer) hsa-miR-4265(6mer)	0.1358	1	ENSG00000134748	ENST00000257181	CDS	36.6931	12.2003	8.7563	14	0	0	3.35426	0					PRPF38A	PRP38 pre-mRNA processing factor 38 (yeast) domain containing A [Source:HGNC Symbol;Acc:25930]	protein_coding
chr1+:53074140-53074192	AGCACCA vertebrate UGGUGCU hsa-miR-29a(7mer-m8) hsa-miR-29b(7mer-m8) hsa-miR-29c(7mer-m8)	0.9896	0.942	ENSG00000116157	ENST00000361314	3'UTR	15.7256	12.2003	0	0	0	0	36.8969	16.0684					GPX7	glutathione peroxidase 7 [Source:HGNC Symbol;Acc:4559]	protein_coding
chr1+:53267581-53267615	UAAAGUG vertebrate CACUUUA hsa-miR-17(7mer-A1) hsa-miR-20a(7mer-A1) hsa-miR-93(7mer-A1) hsa-miR-106a(7mer-A1) hsa-miR-106b(7mer-A1) hsa-miR-20b(7mer-A1) hsa-miR-526b*(7mer-A1) hsa-miR-519d(7mer-A1) hsa-miR-3609(7mer-A1)	0.5538	0.9367	ENSG00000162378	ENST00000294353	CDS	5.24187	28.4674	24.0798	38	115.571	130.698	26.8341	22.4957					ZYG11B	zyg-11 homolog B (C. elegans) [Source:HGNC Symbol;Acc:25820]	protein_coding
chr1+:53323062-53323097	UUACAGG weakly CCUGUAA kshv-miR-K12-1(7mer-m8)	0.1988	0.7321	ENSG00000203995	ENST00000371528	CDS	0	0	8.7563	13	15.8316	13.6777	3.35426	12.8547					ZYG11A	zyg-11 homolog A (C. elegans) [Source:HGNC Symbol;Acc:32058]	protein_coding
chr1+:53323082-53323142	UAGUGCA vertebrate UGCACUA hsa-miR-130a(7mer-A1) hsa-miR-301a(7mer-A1) hsa-miR-130b(7mer-A1) hsa-miR-454(7mer-A1) hsa-miR-301b(7mer-A1) hsa-miR-4295(7mer-A1) hsa-miR-3666(7mer-A1)	0.9078	1	ENSG00000203995	ENST00000371528	CDS	0	0	48.1596	45	17.4148	7.59871	40.2512	44.9914					ZYG11A	zyg-11 homolog A (C. elegans) [Source:HGNC Symbol;Acc:32058]	protein_coding
chr1+:53427292-53427301|53440440-53440461	AAGUGUU no AACACU kshv-miR-K12-10a(6mer) hsa-miR-4255(6mer) hsa-miR-3659(6mer-m8) ACACUU hsa-miR-595(6mer)	0.9447	0.6989	ENSG00000116171	ENST00000371514	CDS	0	0	6.56722	2	4.74948	4.55922	30.1884	32.1367					SCP2	sterol carrier protein 2 [Source:HGNC Symbol;Acc:10606]	protein_coding
chr1+:53662710-53662762	UAGUGCA vertebrate UGCACUA hsa-miR-130a(7mer-A1) hsa-miR-301a(7mer-A1) hsa-miR-130b(7mer-A1) hsa-miR-454(7mer-A1) hsa-miR-301b(7mer-A1) hsa-miR-4295(7mer-A1) hsa-miR-3666(7mer-A1)	0.0858	1	ENSG00000157184	ENST00000371486	CDS	31.4512	61.0016	70.0504	76	11.0821	6.07896	6.70853	12.8547					CPT2	carnitine palmitoyltransferase 2 [Source:HGNC Symbol;Acc:2330]	protein_coding
chr1+:53675873-53675924	AUAGUGU no ACACUA hsa-miR-142-3p(6mer-m8)	0.9858	0.8994	ENSG00000157184	ENST00000371486	CDS	0	4.06677	8.7563	9	104.489	98.7832	83.8566	64.2735					CPT2	carnitine palmitoyltransferase 2 [Source:HGNC Symbol;Acc:2330]	protein_coding
chr1+:53676331-53676403	UGCAGCA vertebrate UGCUGCA hsa-miR-103(7mer-A1) hsa-miR-107(7mer-A1)	0.9139	0.9992	ENSG00000157184	ENST00000371486	CDS	5.24187	0	15.3235	15	142.484	100.303	36.8969	38.5641					CPT2	carnitine palmitoyltransferase 2 [Source:HGNC Symbol;Acc:2330]	protein_coding
chr1+:54675711-54675775	GAUGAUG no CAUCAU hsa-miR-1272(6mer) hsa-miR-1322(6mer) AUCAUC hsa-miR-3682(6mer)	0.6905	1	ENSG00000116221	ENST00000360840	CDS	5.24187	0	4.37815	3	17.4148	15.1974	67.0853	48.2051					MRPL37	mitochondrial ribosomal protein L37 [Source:HGNC Symbol;Acc:14034]	protein_coding
chr1+:567559-567625	GUGGAAG weakly CUUCCAC hsa-miR-3190(7mer-m8)	0.3318	0.6456	ENSG00000237973	ENST00000414273	pseudogene	5.24187	0	28.458	17	0	0	0	0					RP5-857K21.6		pseudogene
chr1+:569877-569943	UUAGUGU weakly ACACUA hsa-miR-142-3p(6mer-m8) CACUAA ebv-miR-BART1-5p(6mer-m8)	0.0028	1	ENSG00000198744	ENST00000416718	pseudogene	26.2094	8.13354	13.1344	24	0	0	0	0					RP5-857K21.11		pseudogene
chr1+:61922070-61922130	AAUGUAG no CUACAU hsa-miR-3668(6mer)	0.5919	0.5998	ENSG00000162599	ENST00000403491	3'UTR	5.24187	12.2003	41.5924	23	36.4127	21.2764	16.7713	6.42735					NFIA	nuclear factor I/A [Source:HGNC Symbol;Acc:7784]	protein_coding
chr1+:61922888-61922945	UUGAUAU no AUAUCA hsa-miR-3689a-5p(6mer-m8) hsa-miR-3689b(6mer-m8)	0.9233	0.9675	ENSG00000162599	ENST00000403491	3'UTR	0	0	0	1	23.7474	33.4343	0	0					NFIA	nuclear factor I/A [Source:HGNC Symbol;Acc:7784]	protein_coding
chr1+:61923999-61924047	UUUGUUU no AAACAAA ebv-miR-BART19-3p(7mer-m8)	0.9919	0.5328	ENSG00000162599	ENST00000403491	3'UTR	0	0	0	0	66.4927	44.0725	0	0					NFIA	nuclear factor I/A [Source:HGNC Symbol;Acc:7784]	protein_coding
chr1+:61924850-61924905	UAAUGCC vertebrate GGCAUUA hsa-miR-365(7mer-A1)	0.9977	0.5488	ENSG00000162599	ENST00000403491	3'UTR	0	0	6.56722	12	212.143	243.159	690.979	761.64					NFIA	nuclear factor I/A [Source:HGNC Symbol;Acc:7784]	protein_coding
chr1+:62905481-62905523	AGUGUCA no UGACAC hsa-miR-592(6mer-m8) hsa-miR-597(6mer)	0.348	0.9989	ENSG00000162607	ENST00000339950	5'UTR	0	0	0	0	0	0	23.4799	19.282					USP1	ubiquitin specific peptidase 1 [Source:HGNC Symbol;Acc:12607]	protein_coding
chr1+:62907953-62907970|62908829-62908843	AAUUUCC no GAAAUU hsa-miR-513a-3p(6mer-m8)	0.0808	1	ENSG00000162607	ENST00000339950	CDS	31.4512	40.6677	4.37815	2	0	1.51974	0	0					USP1	ubiquitin specific peptidase 1 [Source:HGNC Symbol;Acc:12607]	protein_coding
chr1+:63282436-63282479|63284675-63284679	AAAGUGU no ACACUU hsa-miR-595(6mer) CACUUU hsa-miR-17(6mer) hsa-miR-20a(6mer) hsa-miR-93(6mer) hsa-miR-106a(6mer) hsa-miR-106b(6mer) hsa-miR-20b(6mer) hsa-miR-526b*(6mer) hsa-miR-519d(6mer) hsa-miR-520g(6mer-m8) hsa-miR-520h(6mer-m8) hsa-miR-548t(6mer-m8) hsa-miR-3609(6mer)	0.9725	1	ENSG00000125703	ENST00000317868	CDS	10.4837	12.2003	6.56722	2	61.7432	71.4278	10.0628	6.42735					ATG4C	ATG4 autophagy related 4 homolog C (S. cerevisiae) [Source:HGNC Symbol;Acc:16040]	protein_coding
chr1+:65694580-65694621	UUAGUGU weakly ACACUA hsa-miR-142-3p(6mer-m8) CACUAA ebv-miR-BART1-5p(6mer-m8)	0.37	0.8253	ENSG00000162433	ENST00000327299	3'UTR	10.4837	8.13354	0	0	6.33264	1.51974	26.8341	19.282					AK3	adenylate kinase 3-like 2 (pseudogene) [Source:HGNC Symbol;Acc:21596]	protein_coding
chr1+:65897696-65897738	AAAGUGA weakly UCACUUU hsa-miR-3609(7mer-m8)	0.8575	0.8492	ENSG00000213625	ENST00000371065	3'UTR	0	0	10.9454	14	88.6569	71.4278	40.2512	57.8461					LEPROT	leptin receptor overlapping transcript [Source:HGNC Symbol;Acc:29477]	protein_coding
chr1+:6676853-6676892	AAGGUGC vertebrate GCACCUU hsa-miR-18a(7mer-m8) hsa-miR-18b(7mer-m8)	0.9453	0.8634	ENSG00000116273	ENST00000377648	CDS	0	24.4006	0	3	220.059	208.205	20.1256	9.64102					PHF13	PHD finger protein 13 [Source:HGNC Symbol;Acc:22983]	protein_coding
chr1+:67412347-67412373	GUAGUGA no UCACUA hsa-miR-921(6mer) hsa-miR-3606(6mer) CACUAC hsa-miR-142-3p(6mer)	0.9528	0.499	ENSG00000198160	ENST00000371012	3'UTR	15.7256	65.0683	21.8907	11	20.5811	15.1974	3.35426	3.21367					MIER1	mesoderm induction early response 1 homolog (Xenopus laevis) [Source:HGNC Symbol;Acc:29657]	protein_coding
chr1+:67450903-67450947	GUAGUGA no UCACUA hsa-miR-921(6mer) hsa-miR-3606(6mer) CACUAC hsa-miR-142-3p(6mer)	0.9734	0.8797	ENSG00000198160	ENST00000439314	3'UTR	57.6606	52.868	67.8613	63	106.072	91.1845	90.5652	96.4102					MIER1	mesoderm induction early response 1 homolog (Xenopus laevis) [Source:HGNC Symbol;Acc:29657]	protein_coding
chr1+:67451441-67451487	UAACCAC no GUGGUU hsa-miR-497*(6mer-m8)	0.0083	0.9698	ENSG00000198160	ENST00000439314	3'UTR	0	0	8.7563	4	30.08	19.7566	140.879	131.761					MIER1	mesoderm induction early response 1 homolog (Xenopus laevis) [Source:HGNC Symbol;Acc:29657]	protein_coding
chr1+:67453467-67453508	AGUAGUG no CACUAC hsa-miR-142-3p(6mer) ACUACU hsa-miR-199a-3p(6mer-m8) hsa-miR-199b-3p(6mer-m8) hsa-miR-1244(6mer) hsa-miR-3129(6mer-m8)	0.7791	0.7591	ENSG00000198160	ENST00000439314	3'UTR	20.9675	48.8013	6.56722	19	39.579	41.033	70.4396	38.5641					MIER1	mesoderm induction early response 1 homolog (Xenopus laevis) [Source:HGNC Symbol;Acc:29657]	protein_coding
chr1+:68153954-68154004	UGUGUUU no AAACAC hsa-miR-3676(6mer-m8)	0.8942	0.9998	ENSG00000116717	ENST00000370986	3'UTR	31.4512	4.06677	19.7017	21	110.821	129.178	130.816	179.966					GADD45A	growth arrest and DNA-damage-inducible, alpha [Source:HGNC Symbol;Acc:4095]	protein_coding
chr1+:70687304-70687368	UAGUGUU weakly AACACUA kshv-miR-K12-10a(7mer-A1) hsa-miR-4255(7mer-A1)	0.0062	0.4678	ENSG00000116754	ENST00000370950	5'UTR,CDS	0	4.06677	13.1344	8	0	0	0	0					SFRS11	serine/arginine-rich splicing factor 11 [Source:HGNC Symbol;Acc:10782]	protein_coding
chr1+:70687517-70687522|70694104-70694154	AGCAGAC no GUCUGC hsa-miR-3166(6mer) UCUGCU hsa-miR-922(6mer-m8)	0.2973	0.6074	ENSG00000116754	ENST00000370950	CDS	0	20.3339	2.18907	1	0	0	0	0					SFRS11	serine/arginine-rich splicing factor 11 [Source:HGNC Symbol;Acc:10782]	protein_coding
chr1+:70698007-70698060|70700378-70700402	AGUAGGC no	0.0653	0.7976	ENSG00000116754	ENST00000370951	CDS	15.7256	0	6.56722	13	4.74948	6.07896	0	0					SFRS11	serine/arginine-rich splicing factor 11 [Source:HGNC Symbol;Acc:10782]	protein_coding
chr1+:70701226-70701233|70703107-70703164	AGCAGCU weakly AGCUGCU hsa-miR-646(7mer-m8)	0.1233	0.895	ENSG00000116754	ENST00000370951	CDS	10.4837	0	0	0	0	0	0	0					SFRS11	serine/arginine-rich splicing factor 11 [Source:HGNC Symbol;Acc:10782]	protein_coding
chr1+:70703191-70703235|70705121-70705136	AGCAGCA vertebrate UGCUGCU hsa-miR-15a(7mer-m8) hsa-miR-16(7mer-m8) hsa-miR-15b(7mer-m8) hsa-miR-195(7mer-m8) hsa-miR-424(7mer-m8) hsa-miR-497(7mer-m8)	0.7412	0.979	ENSG00000116754	ENST00000370951	CDS	83.87	52.868	17.5126	10	36.4127	28.8751	13.4171	6.42735					SFRS11	serine/arginine-rich splicing factor 11 [Source:HGNC Symbol;Acc:10782]	protein_coding
chr1+:70717657-70717712	UUUACAG no CUGUAAA kshv-miR-K12-1(7mer-A1)	0.8826	0.4677	ENSG00000116754	ENST00000370950	3'UTR	0	0	61.2941	74	1.58316	0	0	0				x	SFRS11	serine/arginine-rich splicing factor 11 [Source:HGNC Symbol;Acc:10782]	protein_coding
chr1+:74665366-74665404	UAUUGCA vertebrate UGCAAUA hsa-miR-25(7mer-A1) hsa-miR-32(7mer-A1) hsa-miR-92a(7mer-A1) hsa-miR-363(7mer-A1) hsa-miR-367(7mer-A1) hsa-miR-92b(7mer-A1)	0.2411	0.7899	ENSG00000116783	ENST00000370895	CDS	31.4512	24.4006	13.1344	9	0	0	0	0					TNNI3K	TNNI3 interacting kinase [Source:HGNC Symbol;Acc:19661]	protein_coding
chr1+:76226894-76226945	AUAGAAG no	0.9733	0.9968	ENSG00000117054	ENST00000370841	CDS	0	0	4.37815	0	30.08	34.954	16.7713	6.42735					ACADM	acyl-CoA dehydrogenase, C-4 to C-12 straight chain [Source:HGNC Symbol;Acc:89]	protein_coding
chr1+:76228650-76228694	UCAAGUA vertebrate UACUUGA hsa-miR-26a(7mer-m8) hsa-miR-26b(7mer-m8) hsa-miR-1297(7mer-m8)	0.6459	0.9695	ENSG00000117054	ENST00000370841	3'UTR	26.2094	8.13354	15.3235	16	136.152	153.494	100.628	109.265					ACADM	acyl-CoA dehydrogenase, C-4 to C-12 straight chain [Source:HGNC Symbol;Acc:89]	protein_coding
chr1+:76228796-76228824	UAUUUUC no GAAAAUA ebv-miR-BART2-5p(7mer-A1)	0.7716	0.8494	ENSG00000117054	ENST00000370841	3'UTR	0	0	0	0	49.0779	62.3094	0	0					ACADM	acyl-CoA dehydrogenase, C-4 to C-12 straight chain [Source:HGNC Symbol;Acc:89]	protein_coding
chr1+:76252925-76252981	CUCAAAA weakly UUUUGAG hsa-miR-373*(7mer-m8) hsa-miR-616*(7mer-m8)	0.0001	0.9983	ENSG00000137955	ENST00000471759	protein_coding	83.87	166.738	2.18907	7	0	0	0	0					RABGGTB	Rab geranylgeranyltransferase, beta subunit [Source:HGNC Symbol;Acc:9796]	protein_coding
chr1+:76253200-76253269	AAAGUGU no ACACUU hsa-miR-595(6mer) CACUUU hsa-miR-17(6mer) hsa-miR-20a(6mer) hsa-miR-93(6mer) hsa-miR-106a(6mer) hsa-miR-106b(6mer) hsa-miR-20b(6mer) hsa-miR-526b*(6mer) hsa-miR-519d(6mer) hsa-miR-520g(6mer-m8) hsa-miR-520h(6mer-m8) hsa-miR-548t(6mer-m8) hsa-miR-3609(6mer)	0.4037	1	ENSG00000137955	ENST00000496055	protein_coding	131.047	52.868	24.0798	5	0	0	0	0					RABGGTB	Rab geranylgeranyltransferase, beta subunit [Source:HGNC Symbol;Acc:9796]	protein_coding
chr1+:76254991-76255041	AGAGUGU no ACACUC hsa-miR-122(6mer-m8) hsa-miR-574-5p(6mer) hsa-miR-3659(6mer) CACUCU hsa-miR-759(6mer-m8)	0.698	0.9986	ENSG00000137955	ENST00000496055	protein_coding	20.9675	16.2671	4.37815	7	1.58316	0	3.35426	6.42735					RABGGTB	Rab geranylgeranyltransferase, beta subunit [Source:HGNC Symbol;Acc:9796]	protein_coding
chr1+:7839830-7839907	GAGUGCA no UGCACU hsa-miR-148a(6mer-m8) hsa-miR-130a(6mer) hsa-miR-152(6mer-m8) hsa-miR-301a(6mer) hsa-miR-130b(6mer) hsa-miR-148b(6mer-m8) hsa-miR-519c-3p(6mer-m8) hsa-miR-519b-3p(6mer-m8) hsa-miR-519a(6mer-m8) hsa-miR-454(6mer) hsa-miR-301b(6mer) hsa-miR-4295(6mer) hsa-miR-3666(6mer) GCACUC hsa-miR-1909*(6mer)	0.2793	0.9869	ENSG00000049245	ENST00000054666	3'UTR	0	8.13354	10.9454	18	7.9158	3.03948	3.35426	3.21367					VAMP3	vesicle-associated membrane protein 3 (cellubrevin) [Source:HGNC Symbol;Acc:12644]	protein_coding
chr1+:7839999-7840025	GGUAACU no AGUUAC ebv-miR-BART13(6mer)	0.9455	1	ENSG00000049245	ENST00000054666	3'UTR	0	0	0	0	26.9137	28.8751	0	0					VAMP3	vesicle-associated membrane protein 3 (cellubrevin) [Source:HGNC Symbol;Acc:12644]	protein_coding
chr1+:7840012-7840065	UAAUGCC vertebrate GGCAUUA hsa-miR-365(7mer-A1)	0.8284	0.9382	ENSG00000049245	ENST00000054666	3'UTR	0	16.2671	2.18907	3	37.9958	37.9935	120.754	151.043					VAMP3	vesicle-associated membrane protein 3 (cellubrevin) [Source:HGNC Symbol;Acc:12644]	protein_coding
chr1+:7840096-7840142	AUCACAG no CUGUGA hsa-miR-27a(6mer) hsa-miR-27b(6mer) kshv-miR-K12-11*(6mer-m8) hsa-miR-513a-5p(6mer)	0.8798	0.7247	ENSG00000049245	ENST00000054666	3'UTR	0	0	0	2	182.063	226.441	0	0					VAMP3	vesicle-associated membrane protein 3 (cellubrevin) [Source:HGNC Symbol;Acc:12644]	protein_coding
chr1+:7840154-7840225	AGUAGUG no CACUAC hsa-miR-142-3p(6mer) ACUACU hsa-miR-199a-3p(6mer-m8) hsa-miR-199b-3p(6mer-m8) hsa-miR-1244(6mer) hsa-miR-3129(6mer-m8)	0.5997	0.4968	ENSG00000049245	ENST00000054666	3'UTR	10.4837	24.4006	8.7563	9	12.6653	9.11845	16.7713	44.9914					VAMP3	vesicle-associated membrane protein 3 (cellubrevin) [Source:HGNC Symbol;Acc:12644]	protein_coding
chr1+:7840390-7840440	GAAUACA no UGUAUU hsa-miR-655(6mer-m8) hsa-miR-374c(6mer-m8) GUAUUC kshv-miR-K12-4-3p(6mer-m8)	0.8891	0.7516	ENSG00000049245	ENST00000054666	3'UTR	0	0	15.3235	25	1.58316	9.11845	10.0628	12.8547					VAMP3	vesicle-associated membrane protein 3 (cellubrevin) [Source:HGNC Symbol;Acc:12644]	protein_coding
chr1+:7841396-7841477	AAGUGCA weakly UGCACUU hsa-miR-519c-3p(7mer-m8) hsa-miR-519b-3p(7mer-m8) hsa-miR-519a(7mer-m8)	0.6528	0.9999	ENSG00000049245	ENST00000054666	3'UTR	31.4512	44.7345	28.458	7	15.8316	16.7172	0	0					VAMP3	vesicle-associated membrane protein 3 (cellubrevin) [Source:HGNC Symbol;Acc:12644]	protein_coding
chr1+:78482648-78482682	GAACAAA no UUUGUU hsa-miR-7-1*(6mer) hsa-miR-7-2*(6mer) hsa-miR-495(6mer) hsa-miR-3065-5p(6mer-m8)	0.6428	0.5029	ENSG00000162616	ENST00000370763	3'UTR	0	0	8.7563	11	0	0	0	12.8547					DNAJB4	DnaJ (Hsp40) homolog, subfamily B, member 4 [Source:HGNC Symbol;Acc:14886]	protein_coding
chr1+:78482764-78482794	NA	0	0	ENSG00000162616	ENST00000370763	3'UTR	0	0	0	0	4.74948	3.03948	0	0					DNAJB4	DnaJ (Hsp40) homolog, subfamily B, member 4 [Source:HGNC Symbol;Acc:14886]	protein_coding
chr1+:78482764-78482821	UAAAGUA weakly UACUUUA hsa-miR-559(7mer-A1) hsa-miR-548b-5p(7mer-A1) hsa-miR-548a-5p(7mer-A1) hsa-miR-548c-5p(7mer-A1) hsa-miR-548d-5p(7mer-A1) hsa-miR-548j(7mer-A1) hsa-miR-548k(7mer-A1) hsa-miR-548l(7mer-A1) hsa-miR-548h(7mer-A1) hsa-miR-548i(7mer-A1) hsa-miR-548w(7mer-A1) hsa-miR-548y(7mer-A1)	0.202	0.9891	ENSG00000162616	ENST00000370763	3'UTR	0	4.06677	4.37815	6	33.2463	18.2369	161.005	176.752					DNAJB4	DnaJ (Hsp40) homolog, subfamily B, member 4 [Source:HGNC Symbol;Acc:14886]	protein_coding
chr1+:78482805-78482864	UGUAGUG vertebrate CACUACA hsa-miR-142-3p(7mer-A1)	0.1198	0.6506	ENSG00000162616	ENST00000370763	3'UTR	10.4837	0	0	0	1.58316	3.03948	0	0					DNAJB4	DnaJ (Hsp40) homolog, subfamily B, member 4 [Source:HGNC Symbol;Acc:14886]	protein_coding
chr1+:78482825-78482895	UAGUGUU weakly AACACUA kshv-miR-K12-10a(7mer-A1) hsa-miR-4255(7mer-A1)	0.6119	0.568	ENSG00000162616	ENST00000370763	3'UTR	10.4837	24.4006	15.3235	19	14.2484	10.6382	3.35426	6.42735					DNAJB4	DnaJ (Hsp40) homolog, subfamily B, member 4 [Source:HGNC Symbol;Acc:14886]	protein_coding
chr1+:78482846-78482933	UGCAACA no UGUUGC hsa-miR-196a*(6mer-m8)	0.6444	0.8464	ENSG00000162616	ENST00000370763	3'UTR	73.3862	44.7345	15.3235	11	22.1642	18.2369	20.1256	6.42735					DNAJB4	DnaJ (Hsp40) homolog, subfamily B, member 4 [Source:HGNC Symbol;Acc:14886]	protein_coding
chr1+:78483574-78483638	AAAUGCC no GGCAUU hsa-miR-365(6mer) GCAUUU hsa-miR-105(6mer-m8) ebv-miR-BART14(6mer)	0.7871	1	ENSG00000162616	ENST00000370763	3'UTR	26.2094	16.2671	10.9454	12	28.4969	30.3948	0	0					DNAJB4	DnaJ (Hsp40) homolog, subfamily B, member 4 [Source:HGNC Symbol;Acc:14886]	protein_coding
chr1+:8022827-8022859	UUGGAAG no CUUCCA hsa-miR-3190(6mer-m8)	0.9829	1	ENSG00000116288	ENST00000493678	5'UTR,CDS	0	0	0	0	33.2463	25.8356	23.4799	51.4188					PARK7	Parkinson disease (autosomal recessive, early onset) 7 [Source:HGNC Symbol;Acc:16369]	protein_coding
chr1+:84610104-84610167	UUAGAGU no CUCUAA hsa-miR-1303(6mer)	0.6321	0.8025	ENSG00000142875	ENST00000370685	CDS	31.4512	0	43.7815	33	3.16632	7.59871	30.1884	48.2051					PRKACB	protein kinase, cAMP-dependent, catalytic, beta [Source:HGNC Symbol;Acc:9381]	protein_coding
chr1+:84662335-84662390	CUGUAGA no UCUACA hsa-miR-3668(6mer-m8) hsa-miR-3674(6mer-m8) CUACAG hsa-miR-20b*(6mer) kshv-miR-K12-2(6mer-m8) hsa-miR-1183(6mer-m8) hsa-miR-3137(6mer)	0.863	0.6971	ENSG00000142875	ENST00000370689	CDS	5.24187	0	15.3235	1	0	0	0	0					PRKACB	protein kinase, cAMP-dependent, catalytic, beta [Source:HGNC Symbol;Acc:9381]	protein_coding
chr1+:84662378-84662425|84663411-84663437	UGAUGGU no ACCAUCA kshv-miR-K12-6-3p(7mer-A1)	0.8971	0.8439	ENSG00000142875	ENST00000370689	CDS	0	0	0	21	269.137	237.08	137.525	93.1965					PRKACB	protein kinase, cAMP-dependent, catalytic, beta [Source:HGNC Symbol;Acc:9381]	protein_coding
chr1+:84700990-84701068	GUGCAAA vertebrate UUUGCAC hsa-miR-19a(7mer-m8) hsa-miR-19b(7mer-m8)	0.1806	0.7473	ENSG00000142875	ENST00000370689	3'UTR	5.24187	20.3339	28.458	36	0	0	0	0					PRKACB	protein kinase, cAMP-dependent, catalytic, beta [Source:HGNC Symbol;Acc:9381]	protein_coding
chr1+:84701085-84701157	GAUGGCA no UGCCAU hsa-miR-183(6mer)	0.6776	0.5499	ENSG00000142875	ENST00000370689	3'UTR	0	0	10.9454	1	0	0	0	0					PRKACB	protein kinase, cAMP-dependent, catalytic, beta [Source:HGNC Symbol;Acc:9381]	protein_coding
chr1+:84702303-84702373	AAAAGUG weakly CACUUUU hsa-miR-548t(7mer-m8)	0.5697	0.7331	ENSG00000142875	ENST00000370689	3'UTR	5.24187	8.13354	0	5	7.9158	3.03948	0	0					PRKACB	protein kinase, cAMP-dependent, catalytic, beta [Source:HGNC Symbol;Acc:9381]	protein_coding
chr1+:84702352-84702418	GUGCAAA vertebrate UUUGCAC hsa-miR-19a(7mer-m8) hsa-miR-19b(7mer-m8)	0.9334	0.8777	ENSG00000142875	ENST00000370689	3'UTR	89.1118	158.604	181.693	161	37.9958	28.8751	3.35426	3.21367					PRKACB	protein kinase, cAMP-dependent, catalytic, beta [Source:HGNC Symbol;Acc:9381]	protein_coding
chr1+:84703979-84704038	UUACAGU weakly ACUGUAA hsa-miR-582-5p(7mer-A1)	0.6437	0.9874	ENSG00000142875	ENST00000370689	3'UTR	0	0	26.2689	24	0	0	0	0					PRKACB	protein kinase, cAMP-dependent, catalytic, beta [Source:HGNC Symbol;Acc:9381]	protein_coding
chr1+:84704044-84704107	UAGUGCA vertebrate UGCACUA hsa-miR-130a(7mer-A1) hsa-miR-301a(7mer-A1) hsa-miR-130b(7mer-A1) hsa-miR-454(7mer-A1) hsa-miR-301b(7mer-A1) hsa-miR-4295(7mer-A1) hsa-miR-3666(7mer-A1)	0.8169	0.8616	ENSG00000142875	ENST00000370689	3'UTR	356.447	475.812	352.441	221	26.9137	24.3159	3.35426	3.21367					PRKACB	protein kinase, cAMP-dependent, catalytic, beta [Source:HGNC Symbol;Acc:9381]	protein_coding
chr1+:84961600-84961644	AAUGACC no	0.3517	1	ENSG00000117133	ENST00000370654	CDS	0	0	0	1	0	0	0	3.21367					RPF1	ribosome production factor 1 homolog (S. cerevisiae) [Source:HGNC Symbol;Acc:30350]	protein_coding
chr1+:84961693-84961746|84961926-84961943	AGAAUAU no UAUUCU kshv-miR-K12-4-3p(6mer)	0.3524	1	ENSG00000117133	ENST00000370654	CDS	0	0	13.1344	4	0	0	40.2512	86.7692					RPF1	ribosome production factor 1 homolog (S. cerevisiae) [Source:HGNC Symbol;Acc:30350]	protein_coding
chr1+:87208944-87208994	UUAGAGU no CUCUAA hsa-miR-1303(6mer)	0.617	0.9988	ENSG00000097033	ENST00000212369	3'UTR	26.2094	16.2671	39.4033	61	246.973	290.271	311.947	363.145					SH3GLB1	SH3-domain GRB2-like endophilin B1 [Source:HGNC Symbol;Acc:10833]	protein_coding
chr1+:87211005-87211045	UUUACAG no CUGUAAA kshv-miR-K12-1(7mer-A1)	0.9779	0.6322	ENSG00000097033	ENST00000370558	protein_coding	0	0	4.37815	5	30.08	36.4738	53.6682	32.1367					SH3GLB1	SH3-domain GRB2-like endophilin B1 [Source:HGNC Symbol;Acc:10833]	protein_coding
chr1+:87211673-87211725	AGCACCA vertebrate UGGUGCU hsa-miR-29a(7mer-m8) hsa-miR-29b(7mer-m8) hsa-miR-29c(7mer-m8)	0.801	0.9726	ENSG00000097033	ENST00000370558	protein_coding	5.24187	4.06677	0	3	28.4969	10.6382	10.0628	6.42735					SH3GLB1	SH3-domain GRB2-like endophilin B1 [Source:HGNC Symbol;Acc:10833]	protein_coding
chr1+:87212056-87212107	AAAGUGC vertebrate GCACUUU hsa-miR-17(7mer-m8) hsa-miR-20a(7mer-m8) hsa-miR-93(7mer-m8) hsa-miR-106a(7mer-m8) hsa-miR-106b(7mer-m8) hsa-miR-20b(7mer-m8) hsa-miR-526b*(7mer-m8) hsa-miR-519d(7mer-m8)	0.8301	0.8051	ENSG00000097033	ENST00000370558	protein_coding	10.4837	12.2003	4.37815	6	1.58316	6.07896	0	0					SH3GLB1	SH3-domain GRB2-like endophilin B1 [Source:HGNC Symbol;Acc:10833]	protein_coding
chr1+:87213646-87213698	GAUCCCA no UGGGAUC kshv-miR-K12-7(7mer-m8)	0.8794	0.8571	ENSG00000097033	ENST00000370558	protein_coding	0	0	43.7815	35	31.6632	31.9146	43.6054	48.2051					SH3GLB1	SH3-domain GRB2-like endophilin B1 [Source:HGNC Symbol;Acc:10833]	protein_coding
chr1+:87213680-87213745	AGUGAAA no UUCACU hsa-miR-3606(6mer-m8)	0.0544	0.5059	ENSG00000097033	ENST00000370558	protein_coding	0	0	2.18907	14	3.16632	4.55922	16.7713	3.21367					SH3GLB1	SH3-domain GRB2-like endophilin B1 [Source:HGNC Symbol;Acc:10833]	protein_coding
chr1+:87538782-87538847	UAGUGUU weakly AACACUA kshv-miR-K12-10a(7mer-A1) hsa-miR-4255(7mer-A1)	0.3153	0.7086	ENSG00000153936	ENST00000370550	CDS	0	8.13354	6.56722	26	15.8316	16.7172	60.3768	96.4102					HS2ST1	heparan sulfate 2-O-sulfotransferase 1 [Source:HGNC Symbol;Acc:5193]	protein_coding
chr1+:87805808-87805873	AAGUGAA no UUCACU hsa-miR-3606(6mer-m8) UCACUU hsa-miR-3609(6mer-m8)	0.0443	0.8763	ENSG00000143013	ENST00000370544	CDS	0	0	4.37815	6	9.49896	19.7566	16.7713	32.1367					LMO4	LIM domain only 4 [Source:HGNC Symbol;Acc:6644]	protein_coding
chr1+:87810573-87810638	AAGGUGC vertebrate GCACCUU hsa-miR-18a(7mer-m8) hsa-miR-18b(7mer-m8)	0.9136	0.8782	ENSG00000143013	ENST00000370544	3'UTR	20.9675	48.8013	26.2689	25	0	0	0	0					LMO4	LIM domain only 4 [Source:HGNC Symbol;Acc:6644]	protein_coding
chr1+:89237447-89237506	UGCAGCA vertebrate UGCUGCA hsa-miR-103(7mer-A1) hsa-miR-107(7mer-A1)	0.3379	0.9829	ENSG00000065243	ENST00000370521	CDS	0	12.2003	4.37815	6	20.5811	18.2369	0	9.64102					PKN2	protein kinase N2 [Source:HGNC Symbol;Acc:9406]	protein_coding
chr1+:89299824-89299855	UAAAUGC no GCAUUUA ebv-miR-BART14(7mer-A1)	0.9586	0.9927	ENSG00000065243	ENST00000370521	3'UTR	0	0	4.37815	3	64.9095	48.6317	90.5652	89.9828					PKN2	protein kinase N2 [Source:HGNC Symbol;Acc:9406]	protein_coding
chr1+:89300129-89300183	AAAGUGA weakly UCACUUU hsa-miR-3609(7mer-m8)	0.3956	0.8587	ENSG00000065243	ENST00000370521	3'UTR	5.24187	4.06677	0	1	52.2443	41.033	0	6.42735					PKN2	protein kinase N2 [Source:HGNC Symbol;Acc:9406]	protein_coding
chr1+:89300183-89300244	AGUGGCC weakly GGCCAC hsa-miR-663b(6mer) hsa-miR-1204(6mer-m8)	0.4499	0.9216	ENSG00000065243	ENST00000370521	3'UTR	5.24187	12.2003	17.5126	8	0	0	0	0					PKN2	protein kinase N2 [Source:HGNC Symbol;Acc:9406]	protein_coding
chr1+:89300214-89300286	AUAACUG no	0.8358	1	ENSG00000065243	ENST00000370521	3'UTR	0	0	10.9454	8	44.3285	44.0725	6.70853	9.64102					PKN2	protein kinase N2 [Source:HGNC Symbol;Acc:9406]	protein_coding
chr1+:89300257-89300306	AUAUUGC no GCAAUA hsa-miR-137(6mer) CAAUAU hsa-miR-1279(6mer-m8)	0.6403	0.9375	ENSG00000065243	ENST00000370521	3'UTR	0	32.5342	6.56722	4	0	0	0	0					PKN2	protein kinase N2 [Source:HGNC Symbol;Acc:9406]	protein_coding
chr1+:89300318-89300388	UUAGUGU weakly ACACUA hsa-miR-142-3p(6mer-m8) CACUAA ebv-miR-BART1-5p(6mer-m8)	0.0304	0.5761	ENSG00000065243	ENST00000370521	3'UTR	15.7256	0	4.37815	6	0	1.51974	0	0					PKN2	protein kinase N2 [Source:HGNC Symbol;Acc:9406]	protein_coding
chr1+:89300734-89300775	UCCCAGC no GCUGGGA kshv-miR-K12-9*(7mer-A1)	0.2653	0.5757	ENSG00000065243	ENST00000370521	3'UTR	0	0	6.56722	21	0	0	0	0					PKN2	protein kinase N2 [Source:HGNC Symbol;Acc:9406]	protein_coding
chr1+:89300977-89301055	UUAGUGU weakly ACACUA hsa-miR-142-3p(6mer-m8) CACUAA ebv-miR-BART1-5p(6mer-m8)	0.4545	0.6716	ENSG00000065243	ENST00000370521	3'UTR	10.4837	0	2.18907	11	20.5811	13.6777	23.4799	32.1367					PKN2	protein kinase N2 [Source:HGNC Symbol;Acc:9406]	protein_coding
chr1+:89300996-89301074	UGAGAAC vertebrate GUUCUCA hsa-miR-146a(7mer-A1) hsa-miR-146b-5p(7mer-A1) hsa-miR-589(7mer-A1)	0.8013	0.9996	ENSG00000065243	ENST00000370521	3'UTR	125.805	305.008	91.9411	118	175.731	189.968	187.839	157.47					PKN2	protein kinase N2 [Source:HGNC Symbol;Acc:9406]	protein_coding
chr1+:89301069-89301124	UAAUGCU vertebrate AGCAUUA hsa-miR-155(7mer-m8) kshv-miR-K12-11(7mer-m8)	0.9818	0.731	ENSG00000065243	ENST00000370521	3'UTR	0	0	56.9159	112	593.685	609.416	841.921	919.11					PKN2	protein kinase N2 [Source:HGNC Symbol;Acc:9406]	protein_coding
chr1+:89301176-89301231	GUGUAAA no UUUACA hsa-miR-3607-3p(6mer-m8)	0.4295	0.9329	ENSG00000065243	ENST00000370521	3'UTR	5.24187	4.06677	6.56722	8	1.58316	4.55922	6.70853	3.21367					PKN2	protein kinase N2 [Source:HGNC Symbol;Acc:9406]	protein_coding
chr1+:90058536-90058588	UUACAGG weakly CCUGUAA kshv-miR-K12-1(7mer-m8)	0.9787	1	ENSG00000197147	ENST00000330947	CDS	0	0	6.56722	4	14.2484	12.1579	53.6682	25.7094					LRRC8B	leucine rich repeat containing 8 family, member B [Source:HGNC Symbol;Acc:30692]	protein_coding
chr1+:90059059-90059122	UUAGUGU weakly ACACUA hsa-miR-142-3p(6mer-m8) CACUAA ebv-miR-BART1-5p(6mer-m8)	0.9225	0.7563	ENSG00000197147	ENST00000330947	3'UTR	73.3862	97.6025	91.9411	146	58.5769	50.1515	73.7938	80.3418					LRRC8B	leucine rich repeat containing 8 family, member B [Source:HGNC Symbol;Acc:30692]	protein_coding
chr1+:90059220-90059288	GUGCAAA vertebrate UUUGCAC hsa-miR-19a(7mer-m8) hsa-miR-19b(7mer-m8)	0.7868	0.9172	ENSG00000197147	ENST00000330947	3'UTR	15.7256	16.2671	43.7815	31	17.4148	21.2764	10.0628	28.9231					LRRC8B	leucine rich repeat containing 8 family, member B [Source:HGNC Symbol;Acc:30692]	protein_coding
chr1+:90398781-90398847	UUUACAG no CUGUAAA kshv-miR-K12-1(7mer-A1)	0.886	0.4591	ENSG00000171492	ENST00000394593	CDS	0	0	24.0798	9	0	6.07896	3.35426	9.64102					LRRC8D	leucine rich repeat containing 8 family, member D [Source:HGNC Symbol;Acc:16992]	protein_coding
chr1+:90400738-90400796	AAAGUGA weakly UCACUUU hsa-miR-3609(7mer-m8)	0.0539	0.3807	ENSG00000171492	ENST00000394593	CDS	15.7256	8.13354	2.18907	0	1.58316	0	3.35426	9.64102					LRRC8D	leucine rich repeat containing 8 family, member D [Source:HGNC Symbol;Acc:16992]	protein_coding
chr1+:90401473-90401535	ACAUUCA vertebrate UGAAUGU hsa-miR-181a(7mer-m8) hsa-miR-181b(7mer-m8) hsa-miR-181c(7mer-m8) hsa-miR-181d(7mer-m8) hsa-miR-4262(7mer-m8)	0.1541	0.9533	ENSG00000171492	ENST00000394593	3'UTR	0	8.13354	13.1344	17	42.7453	24.3159	140.879	160.684					LRRC8D	leucine rich repeat containing 8 family, member D [Source:HGNC Symbol;Acc:16992]	protein_coding
chr1+:91990468-91990546	UUAGUGU weakly ACACUA hsa-miR-142-3p(6mer-m8) CACUAA ebv-miR-BART1-5p(6mer-m8)	0.775	0.5325	ENSG00000097046	ENST00000428239	3'UTR	10.4837	4.06677	10.9454	9	7.9158	7.59871	33.5426	19.282					CDC7	cell division cycle 7 homolog (S. cerevisiae) [Source:HGNC Symbol;Acc:1745]	protein_coding
chr1+:91990597-91990674	AGGGGCA weakly UGCCCC hsa-miR-486-3p(6mer) GCCCCU hsa-miR-423-5p(6mer-m8) hsa-miR-3184(6mer-m8)	0.3847	0.7629	ENSG00000097046	ENST00000428239	3'UTR	5.24187	4.06677	2.18907	6	0	0	3.35426	0					CDC7	cell division cycle 7 homolog (S. cerevisiae) [Source:HGNC Symbol;Acc:1745]	protein_coding
chr1+:93299070-93299113	AAAGAAA no UUCUUU hsa-miR-186(6mer) hsa-miR-3133(6mer)	0.1799	0.3154	ENSG00000122406	ENST00000432788	5'UTR	5.24187	12.2003	0	3	0	0	6.70853	6.42735					RPL5	small nucleolar RNA, C/D box 21 [Source:HGNC Symbol;Acc:10144]	protein_coding
chr1+:93300354-93300414	UGUGCAU no AUGCAC hsa-miR-517b(6mer-m8)	0.0573	0.6938	ENSG00000122406	ENST00000432788	CDS	31.4512	28.4674	0	1	0	0	0	0					RPL5	small nucleolar RNA, C/D box 21 [Source:HGNC Symbol;Acc:10144]	protein_coding
chr1+:93303041-93303121	UGGCCCA weakly GGGCCA hsa-miR-328(6mer) hsa-miR-663b(6mer-m8)	0.4625	0.9998	ENSG00000122406	ENST00000432788	3'UTR	52.4187	61.0016	17.5126	11	0	0	0	0					RPL5	small nucleolar RNA, C/D box 21 [Source:HGNC Symbol;Acc:10144]	protein_coding
chr1+:93307404-93307465	AUCAUAG no CUAUGAU ebv-miR-BART7(7mer-m8)	0.9043	0.9721	ENSG00000122406	ENST00000432788	3'UTR	0	4.06677	0	0	530.358	501.515	0	0					RPL5	small nucleolar RNA, C/D box 21 [Source:HGNC Symbol;Acc:10144]	protein_coding
chr1+:93603507-93603569	ACAAUCA no	0.4782	1	ENSG00000143033	ENST00000370298	3'UTR	136.289	138.27	63.4832	55	14.2484	24.3159	0	6.42735					MTF2	metal response element binding transcription factor 2 [Source:HGNC Symbol;Acc:29535]	protein_coding
chr1+:93603542-93603586	UACUGUU weakly AACAGUA hsa-miR-452(7mer-A1)	0.9713	0.9994	ENSG00000143033	ENST00000370298	3'UTR	0	4.06677	0	0	31.6632	22.7961	40.2512	32.1367					MTF2	metal response element binding transcription factor 2 [Source:HGNC Symbol;Acc:29535]	protein_coding
chr1+:93603642-93603688	UGUGCAA vertebrate UUGCACA hsa-miR-19a(7mer-A1) hsa-miR-19b(7mer-A1)	0.2647	0.9063	ENSG00000143033	ENST00000370298	3'UTR	5.24187	16.2671	0	0	0	0	0	0					MTF2	metal response element binding transcription factor 2 [Source:HGNC Symbol;Acc:29535]	protein_coding
chr1+:93603691-93603736	GAGGUAA no UACCUC hsa-let-7a(6mer) hsa-let-7b(6mer) hsa-let-7c(6mer) hsa-let-7d(6mer) hsa-let-7e(6mer) hsa-let-7f(6mer) hsa-miR-98(6mer) hsa-let-7g(6mer) hsa-let-7i(6mer) hsa-miR-202(6mer)	0.9295	0.9982	ENSG00000143033	ENST00000370298	3'UTR	15.7256	77.2687	4.37815	1	15.8316	34.954	6.70853	6.42735					MTF2	metal response element binding transcription factor 2 [Source:HGNC Symbol;Acc:29535]	protein_coding
chr1+:93705395-93705453	GUAGUGU vertebrate ACACUAC hsa-miR-142-3p(7mer-m8)	0.2051	0.5712	ENSG00000122483	ENST00000343253	CDS	20.9675	28.4674	19.7017	15	9.49896	4.55922	6.70853	9.64102					CCDC18	coiled-coil domain containing 18 [Source:HGNC Symbol;Acc:30370]	protein_coding
chr1+:93812224-93812287	UAGCAGC vertebrate GCUGCUA hsa-miR-15a(7mer-A1) hsa-miR-16(7mer-A1) hsa-miR-15b(7mer-A1) hsa-miR-195(7mer-A1) hsa-miR-424(7mer-A1) hsa-miR-497(7mer-A1) hsa-miR-503(7mer-A1) hsa-miR-646(7mer-A1)	0.6683	0.6106	ENSG00000117505	ENST00000370272	CDS	10.4837	12.2003	6.56722	5	4.74948	0	0	0					DR1	down-regulator of transcription 1, TBP-binding (negative cofactor 2) [Source:HGNC Symbol;Acc:3017]	protein_coding
chr1+:93812302-93812375	AAGGUGA no UCACCUU ebv-miR-BART5(7mer-m8)	0.3877	0.9267	ENSG00000117505	ENST00000370272	CDS	104.837	97.6025	26.2689	37	28.4969	33.4343	0	0					DR1	down-regulator of transcription 1, TBP-binding (negative cofactor 2) [Source:HGNC Symbol;Acc:3017]	protein_coding
chr1+:93819509-93819559	UAAUGCU vertebrate AGCAUUA hsa-miR-155(7mer-m8) kshv-miR-K12-11(7mer-m8)	0.9688	0.6292	ENSG00000117505	ENST00000370272	CDS	0	0	4.37815	6	118.737	153.494	311.947	334.222					DR1	down-regulator of transcription 1, TBP-binding (negative cofactor 2) [Source:HGNC Symbol;Acc:3017]	protein_coding
chr1+:9673506-9673587	UACAGUA vertebrate UACUGUA hsa-miR-101(7mer-A1) hsa-miR-144(7mer-A1)	0.588	0.7052	ENSG00000188807	ENST00000340381	3'UTR	0	4.06677	10.9454	6	3.16632	1.51974	0	0					TMEM201	transmembrane protein 201 [Source:HGNC Symbol;Acc:33719]	protein_coding
chr1+:97279523-97279559	AGAUACA no	0.1491	0.792	ENSG00000117569	ENST00000236228	3'UTR	0	0	8.7563	4	12.6653	9.11845	20.1256	32.1367					PTBP2	polypyrimidine tract binding protein 2 [Source:HGNC Symbol;Acc:17662]	protein_coding
chr1+:9787211-9787241	GUAAACA vertebrate UGUUUAC hsa-miR-30a(7mer-m8) hsa-miR-30c(7mer-m8) hsa-miR-30d(7mer-m8) hsa-miR-30b(7mer-m8) hsa-miR-30e(7mer-m8)	0.6427	0.9994	ENSG00000171608	ENST00000377346	3'UTR	26.2094	44.7345	0	0	0	0	0	0	x				PIK3CD	phosphoinositide-3-kinase, catalytic, delta polypeptide [Source:HGNC Symbol;Acc:8977]	protein_coding
chr1-:10002690-10002763	UUGCACA no GUGCAA hsa-miR-25(6mer-m8) hsa-miR-32(6mer-m8) hsa-miR-92a(6mer-m8) hsa-miR-363(6mer-m8) hsa-miR-367(6mer-m8) hsa-miR-507(6mer-m8) hsa-miR-92b(6mer-m8) hsa-miR-557(6mer-m8)	0.0228	0.3656	ENSG00000162441	ENST00000377223	5'UTR	0	20.3339	8.7563	3	0	0	0	0					LZIC	leucine zipper and CTNNBIP1 domain containing [Source:HGNC Symbol;Acc:17497]	protein_coding
chr1-:100549564-100549626	GUAGUGU vertebrate ACACUAC hsa-miR-142-3p(7mer-m8)	0.8597	0.5697	ENSG00000156876	ENST00000462159	protein_coding	36.6931	97.6025	39.4033	37	0	0	0	0					SASS6	spindle assembly 6 homolog (C. elegans) [Source:HGNC Symbol;Acc:25403]	protein_coding
chr1-:101338683-101338747	ACAUUCU no GAAUGU hsa-miR-181a(6mer) hsa-miR-181b(6mer) hsa-miR-181c(6mer) kshv-miR-K12-3(6mer-m8) hsa-miR-181d(6mer) hsa-miR-543(6mer-m8) hsa-miR-4262(6mer)	0.7941	0.9919	ENSG00000162694	ENST00000370114	3'UTR	10.4837	8.13354	10.9454	20	3.16632	6.07896	3.35426	0					EXTL2	exostoses (multiple)-like 2 [Source:HGNC Symbol;Acc:3516]	protein_coding
chr1-:10521441-10521495	AGGUAGU vertebrate ACUACCU hsa-miR-196a(7mer-m8) hsa-miR-196b(7mer-m8)	0.8773	0.9933	ENSG00000160049	ENST00000377038	3'UTR	0	0	0	1	55.4106	63.8291	3.35426	6.42735					DFFA	DNA fragmentation factor, 45kDa, alpha polypeptide [Source:HGNC Symbol;Acc:2772]	protein_coding
chr1-:10522928-10522966	UAAAGCU mammals AGCUUUA hsa-miR-9*(7mer-m8) hsa-miR-320a(7mer-A1) hsa-miR-320b(7mer-A1) hsa-miR-320c(7mer-A1) hsa-miR-320d(7mer-A1)	0.9776	0.6559	ENSG00000160049	ENST00000377036	3'UTR	0	0	0	0	0	3.03948	50.314	57.8461					DFFA	DNA fragmentation factor, 45kDa, alpha polypeptide [Source:HGNC Symbol;Acc:2772]	protein_coding
chr1-:109472820-109472877	UAGUGUU weakly AACACUA kshv-miR-K12-10a(7mer-A1) hsa-miR-4255(7mer-A1)	0.8648	0.9881	ENSG00000121940	ENST00000369971	3'UTR	0	0	6.56722	7	6.33264	3.03948	46.9597	32.1367					CLCC1	chloride channel CLIC-like 1 [Source:HGNC Symbol;Acc:29675]	protein_coding
chr1-:109486642-109486672	UAAUGCA no GCAUUA hsa-miR-155(6mer) kshv-miR-K12-11(6mer)	0.5992	0.9843	ENSG00000121940	ENST00000369971	CDS	0	0	2.18907	7	6.33264	3.03948	43.6054	19.282					CLCC1	chloride channel CLIC-like 1 [Source:HGNC Symbol;Acc:29675]	protein_coding
chr1-:109513116-109513172	GUGCAAA vertebrate UUUGCAC hsa-miR-19a(7mer-m8) hsa-miR-19b(7mer-m8)	0.6576	0.8162	ENSG00000085433	ENST00000400794	3'UTR	15.7256	28.4674	13.1344	9	12.6653	12.1579	13.4171	9.64102					WDR47	WD repeat domain 47 [Source:HGNC Symbol;Acc:29141]	protein_coding
chr1-:109605185-109605236	AGCAGCA vertebrate UGCUGCU hsa-miR-15a(7mer-m8) hsa-miR-16(7mer-m8) hsa-miR-15b(7mer-m8) hsa-miR-195(7mer-m8) hsa-miR-424(7mer-m8) hsa-miR-497(7mer-m8)	0.0799	0.9997	ENSG00000197780	ENST00000461096	protein_coding	10.4837	4.06677	4.37815	4	23.7474	39.5133	13.4171	12.8547					TAF13	TAF13 RNA polymerase II, TATA box binding protein (TBP)-associated factor, 18kDa [Source:HGNC Symbol;Acc:11546]	protein_coding
chr1-:109606912-109606976	UCAAGUA vertebrate UACUUGA hsa-miR-26a(7mer-m8) hsa-miR-26b(7mer-m8) hsa-miR-1297(7mer-m8)	0.4462	0.8456	ENSG00000197780	ENST00000338366	3'UTR	0	0	2.18907	5	15.8316	21.2764	6.70853	6.42735					TAF13	TAF13 RNA polymerase II, TATA box binding protein (TBP)-associated factor, 18kDa [Source:HGNC Symbol;Acc:11546]	protein_coding
chr1-:109883408-109883445	GUAGUGU vertebrate ACACUAC hsa-miR-142-3p(7mer-m8)	0.6726	0.7976	ENSG00000134243	ENST00000256637	CDS	0	4.06677	0	0	3.16632	0	23.4799	19.282					SORT1	sortilin 1 [Source:HGNC Symbol;Acc:11186]	protein_coding
chr1-:109952570-109952620	AGGAUGA no UCAUCC hsa-miR-1255a(6mer) hsa-miR-1255b(6mer) CAUCCU kshv-miR-K12-5(6mer) hsa-miR-1265(6mer) hsa-miR-3605-5p(6mer-m8)	0.8134	1	ENSG00000143106	ENST00000490870	protein_coding	15.7256	12.2003	6.56722	1	14.2484	28.8751	13.4171	32.1367					PSMA5	proteasome (prosome, macropain) subunit, alpha type, 5 [Source:HGNC Symbol;Acc:9534]	protein_coding
chr1-:109952624-109952636|109953632-109953643	UCAUAGA mammals UCUAUGA hsa-miR-376a(7mer-m8) hsa-miR-376b(7mer-m8)	0.9195	1	ENSG00000143106	ENST00000490870	protein_coding	0	0	0	0	34.8295	36.4738	0	0					PSMA5	proteasome (prosome, macropain) subunit, alpha type, 5 [Source:HGNC Symbol;Acc:9534]	protein_coding
chr1-:109957937-109957985|109964481-109964492	GAUCCCA no UGGGAUC kshv-miR-K12-7(7mer-m8)	0.3199	1	ENSG00000143106	ENST00000490870	protein_coding	0	0	43.7815	16	53.8274	86.6252	271.695	269.948					PSMA5	proteasome (prosome, macropain) subunit, alpha type, 5 [Source:HGNC Symbol;Acc:9534]	protein_coding
chr1-:11114649-11114723	AGGGGCA weakly UGCCCC hsa-miR-486-3p(6mer) GCCCCU hsa-miR-423-5p(6mer-m8) hsa-miR-3184(6mer-m8)	0.4149	0.4161	ENSG00000116649	ENST00000376957	3'UTR	131.047	69.1351	43.7815	59	1.58316	4.55922	3.35426	0					SRM	spermidine synthase [Source:HGNC Symbol;Acc:11296]	protein_coding
chr1-:111215306-111215359	AAAGAAA no UUCUUU hsa-miR-186(6mer) hsa-miR-3133(6mer)	0.4333	0.9995	ENSG00000177272	ENST00000369769	3'UTR	0	0	2.18907	0	1.58316	0	30.1884	22.4957					KCNA3	potassium voltage-gated channel, shaker-related subfamily, member 3 [Source:HGNC Symbol;Acc:6221]	protein_coding
chr1-:11141215-11141279	UCAUAGA mammals UCUAUGA hsa-miR-376a(7mer-m8) hsa-miR-376b(7mer-m8)	0.577	1	ENSG00000171824	ENST00000376936	CDS	0	0	0	0	18.9979	12.1579	0	0					EXOSC10	exosome component 10 [Source:HGNC Symbol;Acc:9138]	protein_coding
chr1-:11148202-11148255|11150610-11150614	UAAAGUG vertebrate CACUUUA hsa-miR-17(7mer-A1) hsa-miR-20a(7mer-A1) hsa-miR-93(7mer-A1) hsa-miR-106a(7mer-A1) hsa-miR-106b(7mer-A1) hsa-miR-20b(7mer-A1) hsa-miR-526b*(7mer-A1) hsa-miR-519d(7mer-A1) hsa-miR-3609(7mer-A1)	0.708	0.572	ENSG00000171824	ENST00000376936	CDS	31.4512	28.4674	4.37815	15	1.58316	3.03948	0	6.42735					EXOSC10	exosome component 10 [Source:HGNC Symbol;Acc:9138]	protein_coding
chr1-:111489815-111489851	UUUACAG no CUGUAAA kshv-miR-K12-1(7mer-A1)	0.6009	0.906	ENSG00000121931	ENST00000369763	3'UTR	10.4837	4.06677	0	0	7.9158	4.55922	0	3.21367					C1orf103	Uncharacterized protein C1orf103 (Receptor-interacting factor 1) [Source:UniProtKB/Swiss-Prot;Acc:Q5T3J3]	protein_coding
chr1-:111490442-111490477	UACAAUC no	0.8989	0.8953	ENSG00000121931	ENST00000369763	3'UTR	0	0	0	1	49.0779	47.112	3.35426	12.8547					C1orf103	Uncharacterized protein C1orf103 (Receptor-interacting factor 1) [Source:UniProtKB/Swiss-Prot;Acc:Q5T3J3]	protein_coding
chr1-:111490511-111490548	UAAUGCU vertebrate AGCAUUA hsa-miR-155(7mer-m8) kshv-miR-K12-11(7mer-m8)	0.8082	0.7762	ENSG00000121931	ENST00000369763	3'UTR	0	0	0	3	71.2422	66.8686	107.336	89.9828					C1orf103	Uncharacterized protein C1orf103 (Receptor-interacting factor 1) [Source:UniProtKB/Swiss-Prot;Acc:Q5T3J3]	protein_coding
chr1-:111490563-111490598	UUUACAG no CUGUAAA kshv-miR-K12-1(7mer-A1)	0.9579	0.6233	ENSG00000121931	ENST00000369763	CDS,3'UTR	0	0	8.7563	4	61.7432	51.6712	43.6054	44.9914					C1orf103	Uncharacterized protein C1orf103 (Receptor-interacting factor 1) [Source:UniProtKB/Swiss-Prot;Acc:Q5T3J3]	protein_coding
chr1-:111490740-111490778	AGCUGCA no GCAGCU hsa-miR-22(6mer) hsa-miR-558(6mer-m8)	0.945	1	ENSG00000121931	ENST00000369763	CDS	20.9675	16.2671	0	6	88.6569	117.02	0	0					C1orf103	Uncharacterized protein C1orf103 (Receptor-interacting factor 1) [Source:UniProtKB/Swiss-Prot;Acc:Q5T3J3]	protein_coding
chr1-:111494573-111494638	AGAUGGC no	0.3553	0.9982	ENSG00000121931	ENST00000369763	CDS	0	0	8.7563	24	136.152	173.25	295.175	257.094					C1orf103	Uncharacterized protein C1orf103 (Receptor-interacting factor 1) [Source:UniProtKB/Swiss-Prot;Acc:Q5T3J3]	protein_coding
chr1-:111729884-111729923	NA	0	0	ENSG00000162777	ENST00000357640	3'UTR	0	0	0	0	0	1.51974	10.0628	28.9231					DENND2D	DENN/MADD domain containing 2D [Source:HGNC Symbol;Acc:26192]	protein_coding
chr1-:11227555-11227574|11259314-11259336	UAAUGCU vertebrate AGCAUUA hsa-miR-155(7mer-m8) kshv-miR-K12-11(7mer-m8)	0.9232	0.7781	ENSG00000198793	ENST00000361445	CDS	0	0	0	0	17.4148	13.6777	43.6054	48.2051					MTOR	mechanistic target of rapamycin (serine/threonine kinase) [Source:HGNC Symbol;Acc:3942]	protein_coding
chr1-:113243857-113243931	AAAGUGC vertebrate GCACUUU hsa-miR-17(7mer-m8) hsa-miR-20a(7mer-m8) hsa-miR-93(7mer-m8) hsa-miR-106a(7mer-m8) hsa-miR-106b(7mer-m8) hsa-miR-20b(7mer-m8) hsa-miR-526b*(7mer-m8) hsa-miR-519d(7mer-m8)	0.6778	0.7556	ENSG00000155366	ENST00000285735	3'UTR	10.4837	4.06677	17.5126	20	22.1642	21.2764	0	6.42735					RHOC	ras homolog gene family, member C [Source:HGNC Symbol;Acc:669]	protein_coding
chr1-:113243984-113244036	GGGCCCG no CGGGCC hsa-miR-1538(6mer) GGGCCC hsa-miR-296-5p(6mer)	0.0512	0.3812	ENSG00000155366	ENST00000285735	3'UTR	0	0	15.3235	10	0	0	0	0					RHOC	ras homolog gene family, member C [Source:HGNC Symbol;Acc:669]	protein_coding
chr1-:113454975-113455032	AAAAUGU no CAUUUU hsa-miR-3662(6mer)	0.5167	0.8363	ENSG00000155380	ENST00000369626	3'UTR	15.7256	16.2671	0	0	0	0	0	0					SLC16A1	solute carrier family 16, member 1 (monocarboxylic acid transporter 1) [Source:HGNC Symbol;Acc:10922]	protein_coding
chr1-:113455461-113455520	UCACACA mammals UGUGUGA hsa-miR-377(7mer-m8)	0.5935	0.9002	ENSG00000155380	ENST00000369626	3'UTR	10.4837	32.5342	0	0	0	0	0	0					SLC16A1	solute carrier family 16, member 1 (monocarboxylic acid transporter 1) [Source:HGNC Symbol;Acc:10922]	protein_coding
chr1-:113456413-113456462	AGCACCA vertebrate UGGUGCU hsa-miR-29a(7mer-m8) hsa-miR-29b(7mer-m8) hsa-miR-29c(7mer-m8)	0.9042	0.9998	ENSG00000155380	ENST00000369626	3'UTR	26.2094	52.868	30.647	39	6.33264	9.11845	13.4171	16.0684					SLC16A1	solute carrier family 16, member 1 (monocarboxylic acid transporter 1) [Source:HGNC Symbol;Acc:10922]	protein_coding
chr1-:113456432-113456487	UUACAGG weakly CCUGUAA kshv-miR-K12-1(7mer-m8)	0.1215	0.9901	ENSG00000155380	ENST00000369626	3'UTR	10.4837	0	4.37815	8	7.9158	10.6382	6.70853	6.42735					SLC16A1	solute carrier family 16, member 1 (monocarboxylic acid transporter 1) [Source:HGNC Symbol;Acc:10922]	protein_coding
chr1-:113459939-113460018	AAGGUGC vertebrate GCACCUU hsa-miR-18a(7mer-m8) hsa-miR-18b(7mer-m8)	0.1809	0.8613	ENSG00000155380	ENST00000369626	CDS	52.4187	85.4022	21.8907	17	12.6653	1.51974	0	3.21367					SLC16A1	solute carrier family 16, member 1 (monocarboxylic acid transporter 1) [Source:HGNC Symbol;Acc:10922]	protein_coding
chr1-:113460083-113460143	UGUCAAC mammals GUUGACA hsa-miR-505(7mer-A1)	0.849	0.9996	ENSG00000155380	ENST00000369626	CDS	0	0	6.56722	28	0	0	16.7713	6.42735					SLC16A1	solute carrier family 16, member 1 (monocarboxylic acid transporter 1) [Source:HGNC Symbol;Acc:10922]	protein_coding
chr1-:113471794-113471854	GAAGACA no UGUCUU hsa-miR-641(6mer) hsa-miR-3617(6mer) GUCUUC hsa-miR-7(6mer-m8)	0.4242	0.9804	ENSG00000155380	ENST00000369626	CDS	15.7256	4.06677	2.18907	2	7.9158	12.1579	0	0					SLC16A1	solute carrier family 16, member 1 (monocarboxylic acid transporter 1) [Source:HGNC Symbol;Acc:10922]	protein_coding
chr1-:113471917-113471966	UUAAGUG no	0.5715	0.7464	ENSG00000155380	ENST00000369626	5'UTR,CDS	10.4837	12.2003	8.7563	11	1.58316	3.03948	0	0					SLC16A1	solute carrier family 16, member 1 (monocarboxylic acid transporter 1) [Source:HGNC Symbol;Acc:10922]	protein_coding
chr1-:114249264-114249315	AUUGCAC vertebrate GUGCAAU hsa-miR-25(7mer-m8) hsa-miR-32(7mer-m8) hsa-miR-92a(7mer-m8) hsa-miR-363(7mer-m8) hsa-miR-367(7mer-m8) hsa-miR-92b(7mer-m8)	0.1542	0.9102	ENSG00000116793	ENST00000393357	CDS	15.7256	12.2003	0	3	0	0	0	0	x				PHTF1	putative homeodomain transcription factor 1 [Source:HGNC Symbol;Acc:8939]	protein_coding
chr1-:114307104-114307147	AUUGCAC vertebrate GUGCAAU hsa-miR-25(7mer-m8) hsa-miR-32(7mer-m8) hsa-miR-92a(7mer-m8) hsa-miR-363(7mer-m8) hsa-miR-367(7mer-m8) hsa-miR-92b(7mer-m8)	0.8315	0.9431	ENSG00000081019	ENST00000261441	3'UTR	10.4837	8.13354	17.5126	11	128.236	107.902	40.2512	48.2051					RSBN1	round spermatid basic protein 1 [Source:HGNC Symbol;Acc:25642]	protein_coding
chr1-:114308389-114308441	UACUGUA weakly UACAGUA kshv-miR-K12-2(7mer-A1) hsa-miR-1183(7mer-A1)	0.3687	0.985	ENSG00000081019	ENST00000261441	3'UTR	0	0	131.344	58	49.0779	48.6317	10.0628	12.8547					RSBN1	round spermatid basic protein 1 [Source:HGNC Symbol;Acc:25642]	protein_coding
chr1-:114935685-114935754	GUGCAAA vertebrate UUUGCAC hsa-miR-19a(7mer-m8) hsa-miR-19b(7mer-m8)	0.9676	0.988	ENSG00000197323	ENST00000450349	3'UTR	5.24187	28.4674	28.458	19	88.6569	95.7437	26.8341	57.8461					TRIM33	tripartite motif-containing 33 [Source:HGNC Symbol;Acc:16290]	protein_coding
chr1-:115167875-115167913	UUCACAG vertebrate CUGUGAA hsa-miR-27a(7mer-A1) hsa-miR-27b(7mer-A1) hsa-miR-513a-5p(7mer-A1)	0.9838	0.6463	ENSG00000175984	ENST00000393274	CDS	0	0	2.18907	0	7.9158	4.55922	63.731	38.5641					DENND2C	DENN/MADD domain containing 2C [Source:HGNC Symbol;Acc:24748]	protein_coding
chr1-:1152309-1152341	UAAAGUA weakly UACUUUA hsa-miR-559(7mer-A1) hsa-miR-548b-5p(7mer-A1) hsa-miR-548a-5p(7mer-A1) hsa-miR-548c-5p(7mer-A1) hsa-miR-548d-5p(7mer-A1) hsa-miR-548j(7mer-A1) hsa-miR-548k(7mer-A1) hsa-miR-548l(7mer-A1) hsa-miR-548h(7mer-A1) hsa-miR-548i(7mer-A1) hsa-miR-548w(7mer-A1) hsa-miR-548y(7mer-A1)	0.6027	0.8401	ENSG00000078808	ENST00000360001	3'UTR	0	0	2.18907	1	11.0821	9.11845	23.4799	25.7094					SDF4	stromal cell derived factor 4 [Source:HGNC Symbol;Acc:24188]	protein_coding
chr1-:115247286-115247316	GAUGGCA no UGCCAU hsa-miR-183(6mer)	0.6604	0.3978	ENSG00000213281	ENST00000369535	3'UTR	5.24187	0	2.18907	0	7.9158	15.1974	36.8969	25.7094					NRAS	neuroblastoma RAS viral (v-ras) oncogene homolog [Source:HGNC Symbol;Acc:7989]	protein_coding
chr1-:115249671-115249746	AUGACAC vertebrate GUGUCAU hsa-miR-425(7mer-m8)	0.7553	1	ENSG00000213281	ENST00000369535	3'UTR	20.9675	40.6677	10.9454	14	66.4927	59.2699	30.1884	22.4957					NRAS	neuroblastoma RAS viral (v-ras) oncogene homolog [Source:HGNC Symbol;Acc:7989]	protein_coding
chr1-:115250476-115250541	AGGUGCA no GCACCU hsa-miR-18a(6mer-m8) hsa-miR-18b(6mer-m8) hsa-miR-764(6mer-m8)	0.2529	0.9972	ENSG00000213281	ENST00000369535	3'UTR	57.6606	61.0016	2.18907	18	0	0	0	0					NRAS	neuroblastoma RAS viral (v-ras) oncogene homolog [Source:HGNC Symbol;Acc:7989]	protein_coding
chr1-:115260017-115260054	UUUGUUU no AAACAAA ebv-miR-BART19-3p(7mer-m8)	0.5292	0.4008	ENSG00000009307	ENST00000438362	3'UTR	0	0	0	0	80.7411	94.224	0	0					CSDE1	cold shock domain containing E1, RNA-binding [Source:HGNC Symbol;Acc:29905]	protein_coding
chr1-:115260323-115260387	GGAAGAA no UUCUUC hsa-miR-3185(6mer) UCUUCC hsa-miR-7(6mer)	0.5392	0.3737	ENSG00000009307	ENST00000438362	3'UTR	10.4837	28.4674	13.1344	2	0	0	0	0					CSDE1	cold shock domain containing E1, RNA-binding [Source:HGNC Symbol;Acc:29905]	protein_coding
chr1-:115260387-115260435	NA	0	0	ENSG00000009307	ENST00000438362	3'UTR	0	0	0	3	0	0	13.4171	32.1367					CSDE1	cold shock domain containing E1, RNA-binding [Source:HGNC Symbol;Acc:29905]	protein_coding
chr1-:115260443-115260476	AGGGCCA no GGCCCU hsa-miR-1296(6mer-m8) hsa-miR-3918(6mer-m8)	0.2677	1	ENSG00000009307	ENST00000438362	3'UTR	31.4512	28.4674	4.37815	7	0	0	0	0					CSDE1	cold shock domain containing E1, RNA-binding [Source:HGNC Symbol;Acc:29905]	protein_coding
chr1-:115260734-115260802	AUCAUAG no CUAUGAU ebv-miR-BART7(7mer-m8)	0.8509	0.9997	ENSG00000009307	ENST00000438362	CDS,3'UTR	10.4837	8.13354	4.37815	4	31.6632	21.2764	0	0					CSDE1	cold shock domain containing E1, RNA-binding [Source:HGNC Symbol;Acc:29905]	protein_coding
chr1-:115263213-115263264	UUGUGCA no GCACAA hsa-miR-2113(6mer-m8)	0.1565	0.6558	ENSG00000009307	ENST00000438362	CDS	20.9675	4.06677	6.56722	17	0	0	0	0					CSDE1	cold shock domain containing E1, RNA-binding [Source:HGNC Symbol;Acc:29905]	protein_coding
chr1-:115268871-115268920	UGCCACA weakly UGUGGC hsa-miR-449b*(6mer-m8) GUGGCA hsa-miR-1227(6mer-m8)	0.7378	1	ENSG00000009307	ENST00000438362	CDS	10.4837	36.6009	0	3	0	0	0	0					CSDE1	cold shock domain containing E1, RNA-binding [Source:HGNC Symbol;Acc:29905]	protein_coding
chr1-:115272883-115272928	UAGUGGU vertebrate ACCACUA hsa-miR-140-5p(7mer-A1)	0.3748	0.6665	ENSG00000009307	ENST00000438362	CDS	26.2094	16.2671	6.56722	7	3.16632	1.51974	0	0					CSDE1	cold shock domain containing E1, RNA-binding [Source:HGNC Symbol;Acc:29905]	protein_coding
chr1-:115275229-115275289	UAGUGAA weakly UUCACUA hsa-miR-3606(7mer-m8)	0.9102	0.888	ENSG00000009307	ENST00000438362	CDS	31.4512	20.3339	10.9454	17	17.4148	19.7566	13.4171	25.7094					CSDE1	cold shock domain containing E1, RNA-binding [Source:HGNC Symbol;Acc:29905]	protein_coding
chr1-:115276613-115276677	UUCCACA weakly UGUGGAA hsa-miR-3692(7mer-m8)	0.3851	0.9055	ENSG00000009307	ENST00000438362	CDS	0	16.2671	2.18907	5	0	0	0	0					CSDE1	cold shock domain containing E1, RNA-binding [Source:HGNC Symbol;Acc:29905]	protein_coding
chr1-:115277109-115277144|115279378-115279412	AGCACCA vertebrate UGGUGCU hsa-miR-29a(7mer-m8) hsa-miR-29b(7mer-m8) hsa-miR-29c(7mer-m8)	0.2674	0.9998	ENSG00000009307	ENST00000438362	CDS	99.5956	146.404	56.9159	69	47.4948	31.9146	43.6054	19.282					CSDE1	cold shock domain containing E1, RNA-binding [Source:HGNC Symbol;Acc:29905]	protein_coding
chr1-:115282452-115282511	UUGUUGU no	0.8175	0.975	ENSG00000009307	ENST00000438362	CDS	20.9675	0	8.7563	13	101.322	106.382	70.4396	83.5555					CSDE1	cold shock domain containing E1, RNA-binding [Source:HGNC Symbol;Acc:29905]	protein_coding
chr1-:115292555-115292626	AGAAUAC no GUAUUCU kshv-miR-K12-4-3p(7mer-m8)	0.2305	0.9854	ENSG00000009307	ENST00000438362	5'UTR	0	4.06677	59.105	67	22.1642	13.6777	53.6682	41.7777					CSDE1	cold shock domain containing E1, RNA-binding [Source:HGNC Symbol;Acc:29905]	protein_coding
chr1-:115292769-115292813	AGCAGCA vertebrate UGCUGCU hsa-miR-15a(7mer-m8) hsa-miR-16(7mer-m8) hsa-miR-15b(7mer-m8) hsa-miR-195(7mer-m8) hsa-miR-424(7mer-m8) hsa-miR-497(7mer-m8)	0.5679	0.987	ENSG00000009307	ENST00000438362	5'UTR	5.24187	8.13354	8.7563	9	0	0	0	0					CSDE1	cold shock domain containing E1, RNA-binding [Source:HGNC Symbol;Acc:29905]	protein_coding
chr1-:115312530-115312601	AAGUGUU no AACACU kshv-miR-K12-10a(6mer) hsa-miR-4255(6mer) hsa-miR-3659(6mer-m8) ACACUU hsa-miR-595(6mer)	0.3777	0.301	ENSG00000052723	ENST00000369528	3'UTR	0	0	13.1344	15	4.74948	6.07896	43.6054	28.9231					SIKE1	suppressor of IKBKE 1 [Source:HGNC Symbol;Acc:26119]	protein_coding
chr1-:115314908-115314934	ACCAGGC no GCCUGGU kshv-miR-K12-12*(7mer-m8) hsa-miR-1911*(7mer-m8)	0.4571	1	ENSG00000052723	ENST00000369528	3'UTR	0	0	26.2689	30	1.58316	1.51974	10.0628	6.42735					SIKE1	suppressor of IKBKE 1 [Source:HGNC Symbol;Acc:26119]	protein_coding
chr1-:115315936-115315991	GUAAACA vertebrate UGUUUAC hsa-miR-30a(7mer-m8) hsa-miR-30c(7mer-m8) hsa-miR-30d(7mer-m8) hsa-miR-30b(7mer-m8) hsa-miR-30e(7mer-m8)	0.9624	0.984	ENSG00000052723	ENST00000369528	3'UTR	0	0	2.18907	11	60.1601	56.2304	20.1256	32.1367					SIKE1	suppressor of IKBKE 1 [Source:HGNC Symbol;Acc:26119]	protein_coding
chr1-:115315968-115315999	UAGUGCU weakly AGCACUA hsa-miR-512-3p(7mer-A1) hsa-miR-520f(7mer-A1)	0.9985	0.3833	ENSG00000052723	ENST00000369528	3'UTR	0	12.2003	8.7563	9	4.74948	4.55922	20.1256	32.1367					SIKE1	suppressor of IKBKE 1 [Source:HGNC Symbol;Acc:26119]	protein_coding
chr1-:115316168-115316230	UUCACAU vertebrate AUGUGAA hsa-miR-23a(7mer-A1) hsa-miR-23b(7mer-A1) hsa-miR-130a*(7mer-A1) hsa-miR-23c(7mer-A1)	0.2017	0.4301	ENSG00000052723	ENST00000369528	3'UTR	0	0	8.7563	18	0	6.07896	0	0					SIKE1	suppressor of IKBKE 1 [Source:HGNC Symbol;Acc:26119]	protein_coding
chr1-:115316420-115316469	UUCUGUG no ACAGAA hsa-miR-3182(6mer-m8)	0.8962	1	ENSG00000052723	ENST00000369528	3'UTR	0	0	0	0	36.4127	22.7961	0	0					SIKE1	suppressor of IKBKE 1 [Source:HGNC Symbol;Acc:26119]	protein_coding
chr1-:117064545-117064604	UACUGCU no	0.7927	0.9923	ENSG00000116815	ENST00000457047	CDS	0	0	6.56722	3	0	1.51974	16.7713	70.7008					CD58	CD58 molecule [Source:HGNC Symbol;Acc:1688]	protein_coding
chr1-:117064566-117064605	NA	0	0	ENSG00000116815	ENST00000457047	CDS	0	0	4.37815	4	0	0	30.1884	44.9914					CD58	CD58 molecule [Source:HGNC Symbol;Acc:1688]	protein_coding
chr1-:118455155-118455203	UAGCAGC vertebrate GCUGCUA hsa-miR-15a(7mer-A1) hsa-miR-16(7mer-A1) hsa-miR-15b(7mer-A1) hsa-miR-195(7mer-A1) hsa-miR-424(7mer-A1) hsa-miR-497(7mer-A1) hsa-miR-503(7mer-A1) hsa-miR-646(7mer-A1)	0.9745	1	ENSG00000196505	ENST00000369443	CDS	0	0	6.56722	2	36.4127	37.9935	6.70853	28.9231					GDAP2	ganglioside induced differentiation associated protein 2 [Source:HGNC Symbol;Acc:18010]	protein_coding
chr1-:11846088-11846158	AAAGUGA weakly UCACUUU hsa-miR-3609(7mer-m8)	0.3815	0.8136	ENSG00000177000	ENST00000376592	3'UTR	15.7256	16.2671	15.3235	22	41.1621	39.5133	3.35426	3.21367					MTHFR	methylenetetrahydrofolate reductase (NAD(P)H) [Source:HGNC Symbol;Acc:7436]	protein_coding
chr1-:11846968-11847026	GAUCCCA no UGGGAUC kshv-miR-K12-7(7mer-m8)	0.8565	1	ENSG00000177000	ENST00000376592	3'UTR	0	0	0	4	36.4127	50.1515	26.8341	51.4188			x		MTHFR	methylenetetrahydrofolate reductase (NAD(P)H) [Source:HGNC Symbol;Acc:7436]	protein_coding
chr1-:1203297-1203335	UUAAUGC vertebrate GCAUUAA hsa-miR-155(7mer-A1) kshv-miR-K12-11(7mer-A1)	0.0073	0.992	ENSG00000160087	ENST00000450390	CDS	5.24187	0	2.18907	0	1.58316	1.51974	20.1256	12.8547					UBE2J2	ubiquitin-conjugating enzyme E2, J2 (UBC6 homolog, yeast) [Source:HGNC Symbol;Acc:19268]	protein_coding
chr1-:120454733-120454792	AACGGAA vertebrate UUCCGUU hsa-miR-191(7mer-m8)	0.8694	0.9999	ENSG00000134250	ENST00000256646	3'UTR	5.24187	4.06677	78.8067	72	158.316	161.093	110.691	112.479					NOTCH2	notch 2 [Source:HGNC Symbol;Acc:7882]	protein_coding
chr1-:120454792-120454858	GCGGUCA no GACCGC kshv-miR-K12-3*(6mer-m8)	0.9687	0.9993	ENSG00000134250	ENST00000256646	3'UTR	0	0	32.8361	75	126.653	123.099	207.964	151.043					NOTCH2	notch 2 [Source:HGNC Symbol;Acc:7882]	protein_coding
chr1-:120454941-120454978	ACAUUCA vertebrate UGAAUGU hsa-miR-181a(7mer-m8) hsa-miR-181b(7mer-m8) hsa-miR-181c(7mer-m8) hsa-miR-181d(7mer-m8) hsa-miR-4262(7mer-m8)	0.9538	1	ENSG00000134250	ENST00000256646	3'UTR	10.4837	12.2003	275.823	236	329.297	296.35	6.70853	12.8547					NOTCH2	notch 2 [Source:HGNC Symbol;Acc:7882]	protein_coding
chr1-:120455055-120455082	AGGAUGC no GCAUCCU kshv-miR-K12-5(7mer-m8)	0.9948	0.9957	ENSG00000134250	ENST00000256646	3'UTR	0	0	19.7017	16	243.807	231.001	20.1256	6.42735					NOTCH2	notch 2 [Source:HGNC Symbol;Acc:7882]	protein_coding
chr1-:120455292-120455356	AAGAUGU no ACAUCU hsa-miR-576-3p(6mer)	0.4063	0.9987	ENSG00000134250	ENST00000256646	3'UTR	0	0	8.7563	3	33.2463	25.8356	33.5426	35.3504					NOTCH2	notch 2 [Source:HGNC Symbol;Acc:7882]	protein_coding
chr1-:120456812-120456877	AGUGAGU weakly ACUCACU hsa-miR-3174(7mer-m8)	0.1929	0.5471	ENSG00000134250	ENST00000256646	3'UTR	0	0	2.18907	4	0	0	6.70853	3.21367					NOTCH2	notch 2 [Source:HGNC Symbol;Acc:7882]	protein_coding
chr1-:120457440-120457500	AGCACCA vertebrate UGGUGCU hsa-miR-29a(7mer-m8) hsa-miR-29b(7mer-m8) hsa-miR-29c(7mer-m8)	0.2665	0.9868	ENSG00000134250	ENST00000256646	3'UTR	0	0	19.7017	6	4.74948	12.1579	0	3.21367					NOTCH2	notch 2 [Source:HGNC Symbol;Acc:7882]	protein_coding
chr1-:120458117-120458198	AGCAGCA vertebrate UGCUGCU hsa-miR-15a(7mer-m8) hsa-miR-16(7mer-m8) hsa-miR-15b(7mer-m8) hsa-miR-195(7mer-m8) hsa-miR-424(7mer-m8) hsa-miR-497(7mer-m8)	0.6833	0.9476	ENSG00000134250	ENST00000256646	CDS	0	0	10.9454	6	0	6.07896	3.35426	6.42735					NOTCH2	notch 2 [Source:HGNC Symbol;Acc:7882]	protein_coding
chr1-:120512352-120512367|120529582-120529622	UGGGGGA weakly UCCCCCA hsa-miR-625(7mer-A1) kshv-miR-K12-12(7mer-A1) hsa-miR-1275(7mer-m8)	0.0019	0.99	ENSG00000134250	ENST00000256646	CDS	0	0	13.1344	23	0	0	0	0					NOTCH2	notch 2 [Source:HGNC Symbol;Acc:7882]	protein_coding
chr1-:121485200-121485236	UAGAAAA no	0.0009	1	TCONS_00001651	TCONS_00001651	lincRNA	0	0	0	0	45.9116	47.112	0	0					NA	NA	NA
chr1-:1270674-1270726	UUAGUGU weakly ACACUA hsa-miR-142-3p(6mer-m8) CACUAA ebv-miR-BART1-5p(6mer-m8)	0.7518	0.4778	ENSG00000107404	ENST00000378888	3'UTR	0	0	6.56722	2	3.16632	7.59871	16.7713	22.4957					DVL1	dishevelled, dsh homolog 1 (Drosophila)-like 1 [Source:HGNC Symbol;Acc:3085]	protein_coding
chr1-:1284688-1284712	GACGCAG no	0.8705	0.9327	ENSG00000107404	ENST00000378888	5'UTR	52.4187	56.9348	8.7563	9	0	0	0	0					DVL1	dishevelled, dsh homolog 1 (Drosophila)-like 1 [Source:HGNC Symbol;Acc:3085]	protein_coding
chr1-:1337483-1337560	AGCAGCA vertebrate UGCUGCU hsa-miR-15a(7mer-m8) hsa-miR-16(7mer-m8) hsa-miR-15b(7mer-m8) hsa-miR-195(7mer-m8) hsa-miR-424(7mer-m8) hsa-miR-497(7mer-m8)	0.271	0.9743	ENSG00000242485	ENST00000344843	CDS	10.4837	44.7345	13.1344	19	0	0	0	0					MRPL20	mitochondrial ribosomal protein L20 [Source:HGNC Symbol;Acc:14478]	protein_coding
chr1-:145514662-145514693	AGCAGCA vertebrate UGCUGCU hsa-miR-15a(7mer-m8) hsa-miR-16(7mer-m8) hsa-miR-15b(7mer-m8) hsa-miR-195(7mer-m8) hsa-miR-424(7mer-m8) hsa-miR-497(7mer-m8)	0.7262	0.8857	ENSG00000211451	ENST00000469718	protein_coding	41.935	28.4674	21.8907	16	98.1559	82.066	30.1884	9.64102					GNRHR2	gonadotropin-releasing hormone (type 2) receptor 2 [Source:HGNC Symbol;Acc:16341]	protein_coding
chr1-:145595136-145595201	UUCACAG vertebrate CUGUGAA hsa-miR-27a(7mer-A1) hsa-miR-27b(7mer-A1) hsa-miR-513a-5p(7mer-A1)	0.7586	0.753	ENSG00000186141	ENST00000334163	CDS	15.7256	12.2003	19.7017	40	47.4948	33.4343	80.5024	67.4871					POLR3C	polymerase (RNA) III (DNA directed) polypeptide C (62kD) [Source:HGNC Symbol;Acc:30076]	protein_coding
chr1-:146626821-146626877	AGCAGCU weakly AGCUGCU hsa-miR-646(7mer-m8)	0.2146	0.5537	ENSG00000131791	ENST00000254101	3'UTR	5.24187	0	2.18907	4	0	0	0	0					PRKAB2	protein kinase, AMP-activated, beta 2 non-catalytic subunit [Source:HGNC Symbol;Acc:9379]	protein_coding
chr1-:146626955-146627001	CAUUCGA no CGAAUG hsa-miR-1298(6mer-m8)	0.6532	1	ENSG00000131791	ENST00000254101	3'UTR	5.24187	8.13354	10.9454	3	1.58316	0	0	0					PRKAB2	protein kinase, AMP-activated, beta 2 non-catalytic subunit [Source:HGNC Symbol;Acc:9379]	protein_coding
chr1-:146627253-146627299	ACAAUCA no	0.9024	0.9749	ENSG00000131791	ENST00000254101	3'UTR	15.7256	28.4674	17.5126	16	0	0	0	0					PRKAB2	protein kinase, AMP-activated, beta 2 non-catalytic subunit [Source:HGNC Symbol;Acc:9379]	protein_coding
chr1-:146627952-146627999	AGCAGCA vertebrate UGCUGCU hsa-miR-15a(7mer-m8) hsa-miR-16(7mer-m8) hsa-miR-15b(7mer-m8) hsa-miR-195(7mer-m8) hsa-miR-424(7mer-m8) hsa-miR-497(7mer-m8)	0.5025	1	ENSG00000131791	ENST00000254101	3'UTR	73.3862	101.669	59.105	44	14.2484	15.1974	0	0					PRKAB2	protein kinase, AMP-activated, beta 2 non-catalytic subunit [Source:HGNC Symbol;Acc:9379]	protein_coding
chr1-:146629548-146629619	GAGGUAG vertebrate CUACCUC hsa-let-7a(7mer-m8) hsa-let-7b(7mer-m8) hsa-let-7c(7mer-m8) hsa-let-7d(7mer-m8) hsa-let-7e(7mer-m8) hsa-let-7f(7mer-m8) hsa-miR-98(7mer-m8) hsa-let-7g(7mer-m8) hsa-let-7i(7mer-m8)	0.3251	0.9871	ENSG00000131791	ENST00000254101	3'UTR	5.24187	8.13354	8.7563	6	0	0	0	0					PRKAB2	protein kinase, AMP-activated, beta 2 non-catalytic subunit [Source:HGNC Symbol;Acc:9379]	protein_coding
chr1-:146629628-146629690	UUAGUGU weakly ACACUA hsa-miR-142-3p(6mer-m8) CACUAA ebv-miR-BART1-5p(6mer-m8)	0.8669	0.4947	ENSG00000131791	ENST00000254101	3'UTR	5.24187	8.13354	21.8907	47	44.3285	57.7502	137.525	125.333					PRKAB2	protein kinase, AMP-activated, beta 2 non-catalytic subunit [Source:HGNC Symbol;Acc:9379]	protein_coding
chr1-:146629925-146629978	AGGUGCA no GCACCU hsa-miR-18a(6mer-m8) hsa-miR-18b(6mer-m8) hsa-miR-764(6mer-m8)	0.9062	0.9999	ENSG00000131791	ENST00000254101	3'UTR	10.4837	0	39.4033	66	1.58316	3.03948	0	0					PRKAB2	protein kinase, AMP-activated, beta 2 non-catalytic subunit [Source:HGNC Symbol;Acc:9379]	protein_coding
chr1-:146629992-146630035	UGUAGUG vertebrate CACUACA hsa-miR-142-3p(7mer-A1)	0.5675	0.5215	ENSG00000131791	ENST00000254101	3'UTR	0	8.13354	4.37815	14	22.1642	22.7961	0	6.42735					PRKAB2	protein kinase, AMP-activated, beta 2 non-catalytic subunit [Source:HGNC Symbol;Acc:9379]	protein_coding
chr1-:146633339-146633359|146634018-146634047	UUAGUGU weakly ACACUA hsa-miR-142-3p(6mer-m8) CACUAA ebv-miR-BART1-5p(6mer-m8)	0.7622	0.9041	ENSG00000131791	ENST00000254101	CDS	5.24187	0	2.18907	5	34.8295	36.4738	13.4171	16.0684					PRKAB2	protein kinase, AMP-activated, beta 2 non-catalytic subunit [Source:HGNC Symbol;Acc:9379]	protein_coding
chr1-:1477235-1477281	AAAAGUG weakly CACUUUU hsa-miR-548t(7mer-m8)	0.4401	0.7226	ENSG00000160075	ENST00000378726	3'UTR	26.2094	8.13354	6.56722	0	1.58316	0	0	0					SSU72	SSU72 RNA polymerase II CTD phosphatase homolog (S. cerevisiae) [Source:HGNC Symbol;Acc:25016]	protein_coding
chr1-:1477429-1477498	AAGGUGC vertebrate GCACCUU hsa-miR-18a(7mer-m8) hsa-miR-18b(7mer-m8)	0.0513	0.5955	ENSG00000160075	ENST00000378726	CDS,3'UTR	10.4837	77.2687	2.18907	0	0	0	0	0					SSU72	SSU72 RNA polymerase II CTD phosphatase homolog (S. cerevisiae) [Source:HGNC Symbol;Acc:25016]	protein_coding
chr1-:1480320-1480382|1500152-1500166	UCCAGCA vertebrate UGCUGGA hsa-miR-338-3p(7mer-A1)	0.6924	0.9984	ENSG00000160075	ENST00000291386	CDS	0	0	102.887	91	9.49896	16.7172	0	0					SSU72	SSU72 RNA polymerase II CTD phosphatase homolog (S. cerevisiae) [Source:HGNC Symbol;Acc:25016]	protein_coding
chr1-:149857720-149857798	AGCAGCC no GCUGCU hsa-miR-15a(6mer) hsa-miR-16(6mer) hsa-miR-15b(6mer) hsa-miR-195(6mer) hsa-miR-424(6mer) kshv-miR-K12-6-5p(6mer-m8) hsa-miR-497(6mer) hsa-miR-503(6mer) hsa-miR-646(6mer)	0.0237	0.4457	ENSG00000184678	ENST00000369155	3'UTR	0	0	2.18907	8	0	0	0	0					HIST2H2BE	histone cluster 2, H2be [Source:HGNC Symbol;Acc:4760]	protein_coding
chr1-:149857908-149857958	UGUAGUG vertebrate CACUACA hsa-miR-142-3p(7mer-A1)	0.0201	0.9591	ENSG00000184678	ENST00000369155	CDS	0	0	19.7017	41	0	0	0	0					HIST2H2BE	histone cluster 2, H2be [Source:HGNC Symbol;Acc:4760]	protein_coding
chr1-:149895836-149895904	AGGGCCA no GGCCCU hsa-miR-1296(6mer-m8) hsa-miR-3918(6mer-m8)	0.0284	0.9229	ENSG00000143368	ENST00000271628	CDS	26.2094	28.4674	0	7	0	0	0	0					SF3B4	splicing factor 3b, subunit 4, 49kDa [Source:HGNC Symbol;Acc:10771]	protein_coding
chr1-:149898303-149898356	AGGUGCA no GCACCU hsa-miR-18a(6mer-m8) hsa-miR-18b(6mer-m8) hsa-miR-764(6mer-m8)	0.5383	0.9624	ENSG00000143368	ENST00000271628	CDS	20.9675	40.6677	0	6	0	3.03948	0	0					SF3B4	splicing factor 3b, subunit 4, 49kDa [Source:HGNC Symbol;Acc:10771]	protein_coding
chr1-:149914273-149914372	GUGCAAA vertebrate UUUGCAC hsa-miR-19a(7mer-m8) hsa-miR-19b(7mer-m8)	0.7672	0.929	ENSG00000163113	ENST00000369135	3'UTR	15.7256	16.2671	41.5924	33	0	0	0	0					OTUD7B	OTU domain containing 7B [Source:HGNC Symbol;Acc:16683]	protein_coding
chr1-:150190880-150190929	UUGCACA no GUGCAA hsa-miR-25(6mer-m8) hsa-miR-32(6mer-m8) hsa-miR-92a(6mer-m8) hsa-miR-363(6mer-m8) hsa-miR-367(6mer-m8) hsa-miR-507(6mer-m8) hsa-miR-92b(6mer-m8) hsa-miR-557(6mer-m8)	0.3843	0.9846	ENSG00000143401	ENST00000314136	3'UTR	15.7256	69.1351	24.0798	16	18.9979	10.6382	6.70853	0					ANP32E	acidic (leucine-rich) nuclear phosphoprotein 32 family, member E [Source:HGNC Symbol;Acc:16673]	protein_coding
chr1-:150191107-150191163	AUUGCAC vertebrate GUGCAAU hsa-miR-25(7mer-m8) hsa-miR-32(7mer-m8) hsa-miR-92a(7mer-m8) hsa-miR-363(7mer-m8) hsa-miR-367(7mer-m8) hsa-miR-92b(7mer-m8)	0.8627	1	ENSG00000143401	ENST00000314136	3'UTR	10.4837	24.4006	17.5126	34	88.6569	74.4673	150.942	176.752					ANP32E	acidic (leucine-rich) nuclear phosphoprotein 32 family, member E [Source:HGNC Symbol;Acc:16673]	protein_coding
chr1-:150192096-150192140	AGGUAGU vertebrate ACUACCU hsa-miR-196a(7mer-m8) hsa-miR-196b(7mer-m8)	0.436	0.8373	ENSG00000143401	ENST00000314136	3'UTR	5.24187	4.06677	0	0	9.49896	10.6382	0	0					ANP32E	acidic (leucine-rich) nuclear phosphoprotein 32 family, member E [Source:HGNC Symbol;Acc:16673]	protein_coding
chr1-:150192657-150192716	AAAAGUG weakly CACUUUU hsa-miR-548t(7mer-m8)	0.992	0.5815	ENSG00000143401	ENST00000314136	3'UTR	0	0	0	1	56.9937	54.7107	0	0					ANP32E	acidic (leucine-rich) nuclear phosphoprotein 32 family, member E [Source:HGNC Symbol;Acc:16673]	protein_coding
chr1-:150201457-150201502	UGUGAUU no	0.3787	0.5446	ENSG00000143401	ENST00000314136	CDS	0	0	0	1	36.4127	30.3948	0	0					ANP32E	acidic (leucine-rich) nuclear phosphoprotein 32 family, member E [Source:HGNC Symbol;Acc:16673]	protein_coding
chr1-:150202946-150202977	GAGGUAG vertebrate CUACCUC hsa-let-7a(7mer-m8) hsa-let-7b(7mer-m8) hsa-let-7c(7mer-m8) hsa-let-7d(7mer-m8) hsa-let-7e(7mer-m8) hsa-let-7f(7mer-m8) hsa-miR-98(7mer-m8) hsa-let-7g(7mer-m8) hsa-let-7i(7mer-m8)	0.8588	1	ENSG00000143401	ENST00000314136	CDS	52.4187	101.669	21.8907	17	4.74948	12.1579	6.70853	6.42735					ANP32E	acidic (leucine-rich) nuclear phosphoprotein 32 family, member E [Source:HGNC Symbol;Acc:16673]	protein_coding
chr1-:150238038-150238137	UAAUGCC vertebrate GGCAUUA hsa-miR-365(7mer-A1)	0.3628	1	ENSG00000117362	ENST00000360244	3'UTR	0	4.06677	24.0798	31	0	0	3.35426	3.21367					APH1A	anterior pharynx defective 1 homolog A (C. elegans) [Source:HGNC Symbol;Acc:29509]	protein_coding
chr1-:150547160-150547211	AGGUGUU no AACACC kshv-miR-K12-10b(6mer) hsa-miR-609(6mer-m8) ACACCU hsa-miR-3934(6mer-m8)	0.811	0.9987	ENSG00000143384	ENST00000369026	3'UTR	0	4.06677	26.2689	18	0	0	0	0					MCL1	myeloid cell leukemia sequence 1 (BCL2-related) [Source:HGNC Symbol;Acc:6943]	protein_coding
chr1-:150547406-150547473	CACUGCC no	0.2857	0.5066	ENSG00000143384	ENST00000369026	3'UTR	10.4837	4.06677	2.18907	7	0	0	0	0					MCL1	myeloid cell leukemia sequence 1 (BCL2-related) [Source:HGNC Symbol;Acc:6943]	protein_coding
chr1-:150547594-150547644	AAAGUGC vertebrate GCACUUU hsa-miR-17(7mer-m8) hsa-miR-20a(7mer-m8) hsa-miR-93(7mer-m8) hsa-miR-106a(7mer-m8) hsa-miR-106b(7mer-m8) hsa-miR-20b(7mer-m8) hsa-miR-526b*(7mer-m8) hsa-miR-519d(7mer-m8)	0.526	0.6527	ENSG00000143384	ENST00000369026	3'UTR	5.24187	0	6.56722	1	11.0821	9.11845	3.35426	0					MCL1	myeloid cell leukemia sequence 1 (BCL2-related) [Source:HGNC Symbol;Acc:6943]	protein_coding
chr1-:150547612-150547665	ACAUGAU no AUCAUG hsa-miR-433(6mer-m8)	0.8659	1	ENSG00000143384	ENST00000369026	3'UTR	0	0	2.18907	1	34.8295	30.3948	0	0					MCL1	myeloid cell leukemia sequence 1 (BCL2-related) [Source:HGNC Symbol;Acc:6943]	protein_coding
chr1-:150547624-150547706	AAAUAAG no	0.5235	0.9996	ENSG00000143384	ENST00000369026	3'UTR	5.24187	8.13354	26.2689	29	25.3305	24.3159	20.1256	9.64102					MCL1	myeloid cell leukemia sequence 1 (BCL2-related) [Source:HGNC Symbol;Acc:6943]	protein_coding
chr1-:150547739-150547801	ACAUUCU no GAAUGU hsa-miR-181a(6mer) hsa-miR-181b(6mer) hsa-miR-181c(6mer) kshv-miR-K12-3(6mer-m8) hsa-miR-181d(6mer) hsa-miR-543(6mer-m8) hsa-miR-4262(6mer)	0.1512	1	ENSG00000143384	ENST00000369026	3'UTR	20.9675	8.13354	4.37815	8	1.58316	3.03948	0	0					MCL1	myeloid cell leukemia sequence 1 (BCL2-related) [Source:HGNC Symbol;Acc:6943]	protein_coding
chr1-:150547770-150547828	AAAUGGA weakly CCAUUU hsa-miR-224*(6mer) hsa-miR-522(6mer)	0.1649	0.3695	ENSG00000143384	ENST00000369026	3'UTR	10.4837	0	0	6	0	0	0	0					MCL1	myeloid cell leukemia sequence 1 (BCL2-related) [Source:HGNC Symbol;Acc:6943]	protein_coding
chr1-:150548047-150548104	AUACCAG no	0.2984	0.748	ENSG00000143384	ENST00000369026	3'UTR	0	0	6.56722	6	1.58316	4.55922	46.9597	35.3504					MCL1	myeloid cell leukemia sequence 1 (BCL2-related) [Source:HGNC Symbol;Acc:6943]	protein_coding
chr1-:150548083-150548144	UUAGUGU weakly ACACUA hsa-miR-142-3p(6mer-m8) CACUAA ebv-miR-BART1-5p(6mer-m8)	0.3763	0.8807	ENSG00000143384	ENST00000369026	3'UTR	10.4837	4.06677	48.1596	37	11.0821	9.11845	26.8341	12.8547					MCL1	myeloid cell leukemia sequence 1 (BCL2-related) [Source:HGNC Symbol;Acc:6943]	protein_coding
chr1-:150548106-150548182	UCAAGUU no AACUUGA ebv-miR-BART18-5p(7mer-A1)	0.6322	0.9232	ENSG00000143384	ENST00000369026	3'UTR	0	0	2.18907	1	151.983	141.336	0	0					MCL1	myeloid cell leukemia sequence 1 (BCL2-related) [Source:HGNC Symbol;Acc:6943]	protein_coding
chr1-:150548201-150548260	UUCACAG vertebrate CUGUGAA hsa-miR-27a(7mer-A1) hsa-miR-27b(7mer-A1) hsa-miR-513a-5p(7mer-A1)	0.3001	0.5683	ENSG00000143384	ENST00000369026	3'UTR	15.7256	4.06677	13.1344	9	3.16632	1.51974	6.70853	12.8547					MCL1	myeloid cell leukemia sequence 1 (BCL2-related) [Source:HGNC Symbol;Acc:6943]	protein_coding
chr1-:150548239-150548318	AAAGCUG mammals CAGCUUU hsa-miR-320a(7mer-m8) hsa-miR-320b(7mer-m8) hsa-miR-320c(7mer-m8) hsa-miR-320d(7mer-m8)	0.0432	0.6974	ENSG00000143384	ENST00000369026	3'UTR	5.24187	0	2.18907	7	42.7453	56.2304	3.35426	0					MCL1	myeloid cell leukemia sequence 1 (BCL2-related) [Source:HGNC Symbol;Acc:6943]	protein_coding
chr1-:150548301-150548370	AAGGAAG no UUCCUU hsa-miR-1252(6mer-m8)	0.2751	0.5519	ENSG00000143384	ENST00000369026	3'UTR	5.24187	0	8.7563	22	4.74948	12.1579	0	0					MCL1	myeloid cell leukemia sequence 1 (BCL2-related) [Source:HGNC Symbol;Acc:6943]	protein_coding
chr1-:150548399-150548461	UGGGAAU no	0.923	1	ENSG00000143384	ENST00000369026	3'UTR	0	8.13354	0	0	269.137	218.843	0	0					MCL1	myeloid cell leukemia sequence 1 (BCL2-related) [Source:HGNC Symbol;Acc:6943]	protein_coding
chr1-:150548441-150548498	UUUAUUG no	0.19	1	ENSG00000143384	ENST00000369026	3'UTR	0	0	0	0	9.49896	12.1579	6.70853	9.64102					MCL1	myeloid cell leukemia sequence 1 (BCL2-related) [Source:HGNC Symbol;Acc:6943]	protein_coding
chr1-:150548470-150548521	GCUUAGA no	0.3373	0.5742	ENSG00000143384	ENST00000369026	3'UTR	5.24187	12.2003	2.18907	3	1.58316	1.51974	0	0					MCL1	myeloid cell leukemia sequence 1 (BCL2-related) [Source:HGNC Symbol;Acc:6943]	protein_coding
chr1-:150548470-150548548	AGCACCA vertebrate UGGUGCU hsa-miR-29a(7mer-m8) hsa-miR-29b(7mer-m8) hsa-miR-29c(7mer-m8)	0.7762	1	ENSG00000143384	ENST00000369026	3'UTR	57.6606	73.2019	56.9159	87	588.935	624.614	251.57	305.299					MCL1	myeloid cell leukemia sequence 1 (BCL2-related) [Source:HGNC Symbol;Acc:6943]	protein_coding
chr1-:150548656-150548714	AUGAGCC no GCUCAU hsa-miR-556-5p(6mer)	0.8967	0.5364	ENSG00000143384	ENST00000369026	3'UTR	0	0	2.18907	4	3.16632	3.03948	10.0628	25.7094					MCL1	myeloid cell leukemia sequence 1 (BCL2-related) [Source:HGNC Symbol;Acc:6943]	protein_coding
chr1-:150549007-150549070	UUAGCAU no UGCUAA hsa-miR-374b*(6mer)	0.4094	0.6067	ENSG00000143384	ENST00000369026	3'UTR	0	0	6.56722	12	7.9158	9.11845	3.35426	12.8547					MCL1	myeloid cell leukemia sequence 1 (BCL2-related) [Source:HGNC Symbol;Acc:6943]	protein_coding
chr1-:150549047-150549108	AAAGUUC no GAACUU hsa-miR-148a*(6mer) ebv-miR-BART18-5p(6mer-m8) AACUUU hsa-miR-561(6mer)	0.928	0.8865	ENSG00000143384	ENST00000369026	3'UTR	0	0	0	0	45.9116	48.6317	0	0					MCL1	myeloid cell leukemia sequence 1 (BCL2-related) [Source:HGNC Symbol;Acc:6943]	protein_coding
chr1-:150549156-150549222	UUUACAA no	0.2797	0.9996	ENSG00000143384	ENST00000369026	3'UTR	10.4837	4.06677	17.5126	21	31.6632	45.5922	20.1256	28.9231					MCL1	myeloid cell leukemia sequence 1 (BCL2-related) [Source:HGNC Symbol;Acc:6943]	protein_coding
chr1-:150549222-150549276	UCAAGUA vertebrate UACUUGA hsa-miR-26a(7mer-m8) hsa-miR-26b(7mer-m8) hsa-miR-1297(7mer-m8)	0.9573	1	ENSG00000143384	ENST00000369026	3'UTR	0	0	10.9454	6	736.169	674.765	439.409	443.487					MCL1	myeloid cell leukemia sequence 1 (BCL2-related) [Source:HGNC Symbol;Acc:6943]	protein_coding
chr1-:150549331-150549383	GGGAAAG weakly CUUUCCC hsa-miR-3153(7mer-m8)	0.1726	0.9684	ENSG00000143384	ENST00000369026	3'UTR	0	0	19.7017	22	18.9979	9.11845	26.8341	25.7094					MCL1	myeloid cell leukemia sequence 1 (BCL2-related) [Source:HGNC Symbol;Acc:6943]	protein_coding
chr1-:150549377-150549422	GCUUACA no UGUAAG hsa-miR-600(6mer)	0.845	0.9998	ENSG00000143384	ENST00000369026	3'UTR	5.24187	4.06677	0	1	7.9158	12.1579	0	0					MCL1	myeloid cell leukemia sequence 1 (BCL2-related) [Source:HGNC Symbol;Acc:6943]	protein_coding
chr1-:150549456-150549510	UACAGUA vertebrate UACUGUA hsa-miR-101(7mer-A1) hsa-miR-144(7mer-A1)	0.1989	1	ENSG00000143384	ENST00000369026	3'UTR	10.4837	16.2671	13.1344	13	15.8316	7.59871	10.0628	6.42735					MCL1	myeloid cell leukemia sequence 1 (BCL2-related) [Source:HGNC Symbol;Acc:6943]	protein_coding
chr1-:150550821-150550891	AGGCACC no GGUGCC hsa-miR-593*(6mer) GUGCCU hsa-miR-124(6mer-m8) hsa-miR-506(6mer-m8) hsa-miR-4269(6mer-m8) hsa-miR-3622a-5p(6mer)	0.1675	0.9255	ENSG00000143384	ENST00000369026	CDS	5.24187	16.2671	10.9454	12	30.08	28.8751	3.35426	19.282					MCL1	myeloid cell leukemia sequence 1 (BCL2-related) [Source:HGNC Symbol;Acc:6943]	protein_coding
chr1-:150937800-150937849	GGUCCCU no AGGGAC hsa-miR-2114(6mer-m8) GGGACC hsa-miR-4281(6mer)	0.3097	1	ENSG00000143418	ENST00000271688	3'UTR	0	0	10.9454	13	0	0	0	0					LASS2	LAG1 homolog, ceramide synthase 2 [Source:HGNC Symbol;Acc:14076]	protein_coding
chr1-:150937913-150937993	GGGGGAA weakly UUCCCCC hsa-miR-625(7mer-m8)	0.3572	0.7817	ENSG00000143418	ENST00000271688	3'UTR	0	0	10.9454	13	0	0	6.70853	3.21367					LASS2	LAG1 homolog, ceramide synthase 2 [Source:HGNC Symbol;Acc:14076]	protein_coding
chr1-:150938111-150938161	UGUGUCA weakly UGACACA hsa-miR-592(7mer-m8) hsa-miR-597(7mer-A1)	0.8539	0.8548	ENSG00000143418	ENST00000271688	3'UTR	10.4837	8.13354	10.9454	30	281.802	303.948	325.364	321.367					LASS2	LAG1 homolog, ceramide synthase 2 [Source:HGNC Symbol;Acc:14076]	protein_coding
chr1-:150938377-150938438	AGAAUAU no UAUUCU kshv-miR-K12-4-3p(6mer)	0.0278	0.88	ENSG00000143418	ENST00000271688	3'UTR	0	8.13354	24.0798	26	0	0	0	0					LASS2	LAG1 homolog, ceramide synthase 2 [Source:HGNC Symbol;Acc:14076]	protein_coding
chr1-:150938428-150938512	AGAAUUU no	0.3747	0.4226	ENSG00000143418	ENST00000271688	3'UTR	5.24187	0	2.18907	8	6.33264	4.55922	30.1884	9.64102					LASS2	LAG1 homolog, ceramide synthase 2 [Source:HGNC Symbol;Acc:14076]	protein_coding
chr1-:150938473-150938517	UGGGUGA weakly UCACCCA hsa-miR-1262(7mer-m8)	0.3211	0.9991	ENSG00000143418	ENST00000271688	3'UTR	0	0	6.56722	9	0	0	0	0					LASS2	LAG1 homolog, ceramide synthase 2 [Source:HGNC Symbol;Acc:14076]	protein_coding
chr1-:150938521-150938599	UAAAGUG vertebrate CACUUUA hsa-miR-17(7mer-A1) hsa-miR-20a(7mer-A1) hsa-miR-93(7mer-A1) hsa-miR-106a(7mer-A1) hsa-miR-106b(7mer-A1) hsa-miR-20b(7mer-A1) hsa-miR-526b*(7mer-A1) hsa-miR-519d(7mer-A1) hsa-miR-3609(7mer-A1)	0.5158	0.5863	ENSG00000143418	ENST00000271688	3'UTR	0	16.2671	6.56722	15	1.58316	3.03948	0	0					LASS2	LAG1 homolog, ceramide synthase 2 [Source:HGNC Symbol;Acc:14076]	protein_coding
chr1-:150941408-150941472	AGGGGCA weakly UGCCCC hsa-miR-486-3p(6mer) GCCCCU hsa-miR-423-5p(6mer-m8) hsa-miR-3184(6mer-m8)	0.0682	0.3632	ENSG00000143418	ENST00000271688	CDS	5.24187	4.06677	6.56722	0	0	0	0	0					LASS2	LAG1 homolog, ceramide synthase 2 [Source:HGNC Symbol;Acc:14076]	protein_coding
chr1-:151023541-151023604	UAGUGAU weakly AUCACUA hsa-miR-1245(7mer-A1)	0.0002	0.644	ENSG00000197622	ENST00000357235	3'UTR	0	0	2.18907	4	7.9158	6.07896	36.8969	16.0684					CDC42SE1	CDC42 small effector 1 [Source:HGNC Symbol;Acc:17719]	protein_coding
chr1-:151023566-151023655	AGCACCA vertebrate UGGUGCU hsa-miR-29a(7mer-m8) hsa-miR-29b(7mer-m8) hsa-miR-29c(7mer-m8)	0.83	0.9917	ENSG00000197622	ENST00000357235	3'UTR	15.7256	12.2003	28.458	16	3.16632	4.55922	0	0					CDC42SE1	CDC42 small effector 1 [Source:HGNC Symbol;Acc:17719]	protein_coding
chr1-:151024102-151024164	AGAAUAC no GUAUUCU kshv-miR-K12-4-3p(7mer-m8)	0.5195	0.9143	ENSG00000197622	ENST00000357235	3'UTR	0	8.13354	32.8361	32	0	1.51974	16.7713	25.7094					CDC42SE1	CDC42 small effector 1 [Source:HGNC Symbol;Acc:17719]	protein_coding
chr1-:151024702-151024724	UAAUGCA no GCAUUA hsa-miR-155(6mer) kshv-miR-K12-11(6mer)	0.9188	0.9894	ENSG00000197622	ENST00000357235	3'UTR	0	20.3339	13.1344	9	20.5811	16.7172	23.4799	3.21367					CDC42SE1	CDC42 small effector 1 [Source:HGNC Symbol;Acc:17719]	protein_coding
chr1-:151132636-151132696	UUACAGG weakly CCUGUAA kshv-miR-K12-1(7mer-m8)	0.4988	0.9556	ENSG00000163155	ENST00000368908	3'UTR	0	0	4.37815	5	9.49896	13.6777	20.1256	9.64102					LYSMD1	LysM, putative peptidoglycan-binding, domain containing 1 [Source:HGNC Symbol;Acc:32070]	protein_coding
chr1-:151132973-151133025	AGCACCA vertebrate UGGUGCU hsa-miR-29a(7mer-m8) hsa-miR-29b(7mer-m8) hsa-miR-29c(7mer-m8)	0.9275	0.968	ENSG00000163155	ENST00000368908	3'UTR	0	24.4006	45.9706	49	66.4927	56.2304	80.5024	77.1281					LYSMD1	LysM, putative peptidoglycan-binding, domain containing 1 [Source:HGNC Symbol;Acc:32070]	protein_coding
chr1-:151149402-151149481	AGCGAGC no	0.7634	1	ENSG00000163159	ENST00000491094	protein_coding	5.24187	32.5342	8.7563	14	0	0	0	0					VPS72	vacuolar protein sorting 72 homolog (S. cerevisiae) [Source:HGNC Symbol;Acc:11644]	protein_coding
chr1-:151278761-151278839|151280049-151280054	ACAUUCA vertebrate UGAAUGU hsa-miR-181a(7mer-m8) hsa-miR-181b(7mer-m8) hsa-miR-181c(7mer-m8) hsa-miR-181d(7mer-m8) hsa-miR-4262(7mer-m8)	0.2968	0.4501	ENSG00000143393	ENST00000368875	CDS	5.24187	0	41.5924	61	1.58316	0	6.70853	0					PI4KB	phosphatidylinositol 4-kinase, catalytic, beta [Source:HGNC Symbol;Acc:8984]	protein_coding
chr1-:151288252-151288312	GUGGAAA no UUUCCA hsa-miR-875-3p(6mer-m8) hsa-miR-3688(6mer-m8) UUCCAC hsa-miR-3190(6mer)	0.3609	0.9924	ENSG00000143393	ENST00000368875	CDS	15.7256	12.2003	6.56722	12	39.579	27.3553	10.0628	22.4957					PI4KB	phosphatidylinositol 4-kinase, catalytic, beta [Source:HGNC Symbol;Acc:8984]	protein_coding
chr1-:151288496-151288543	GGUAUGA no	0.5181	1	ENSG00000143393	ENST00000368875	CDS	0	0	8.7563	6	3.16632	1.51974	16.7713	9.64102					PI4KB	phosphatidylinositol 4-kinase, catalytic, beta [Source:HGNC Symbol;Acc:8984]	protein_coding
chr1-:151376482-151376522	GUGCAAA vertebrate UUUGCAC hsa-miR-19a(7mer-m8) hsa-miR-19b(7mer-m8)	0.9831	0.9919	ENSG00000143442	ENST00000271715	3'UTR	20.9675	52.868	19.7017	15	262.804	246.198	3.35426	6.42735					POGZ	pogo transposable element with ZNF domain [Source:HGNC Symbol;Acc:18801]	protein_coding
chr1-:151376815-151376873	UAGCAUC no	0.9262	1	ENSG00000143442	ENST00000271715	3'UTR	262.094	256.207	126.966	109	242.223	235.56	70.4396	51.4188					POGZ	pogo transposable element with ZNF domain [Source:HGNC Symbol;Acc:18801]	protein_coding
chr1-:151376887-151376934	GAGGUAA no UACCUC hsa-let-7a(6mer) hsa-let-7b(6mer) hsa-let-7c(6mer) hsa-let-7d(6mer) hsa-let-7e(6mer) hsa-let-7f(6mer) hsa-miR-98(6mer) hsa-let-7g(6mer) hsa-let-7i(6mer) hsa-miR-202(6mer)	0.6353	0.8735	ENSG00000143442	ENST00000271715	3'UTR	15.7256	28.4674	8.7563	8	6.33264	1.51974	0	0					POGZ	pogo transposable element with ZNF domain [Source:HGNC Symbol;Acc:18801]	protein_coding
chr1-:151378161-151378221	GUACAAA no UUUGUA hsa-miR-524-5p(6mer) hsa-miR-520d-5p(6mer) hsa-miR-1283(6mer-m8) ebv-miR-BART22(6mer)	0.8119	0.9028	ENSG00000143442	ENST00000271715	CDS	0	36.6009	4.37815	8	4.74948	3.03948	0	0					POGZ	pogo transposable element with ZNF domain [Source:HGNC Symbol;Acc:18801]	protein_coding
chr1-:151397519-151397537|151400298-151400327	GAGGUCA no	0.0414	0.8535	ENSG00000143442	ENST00000271715	CDS	0	0	15.3235	21	14.2484	19.7566	36.8969	32.1367					POGZ	pogo transposable element with ZNF domain [Source:HGNC Symbol;Acc:18801]	protein_coding
chr1-:151402173-151402187|151403141-151403197	GUAGUGA no UCACUA hsa-miR-921(6mer) hsa-miR-3606(6mer) CACUAC hsa-miR-142-3p(6mer)	0.5221	1	ENSG00000143442	ENST00000271715	CDS	5.24187	8.13354	2.18907	8	11.0821	12.1579	0	3.21367					POGZ	pogo transposable element with ZNF domain [Source:HGNC Symbol;Acc:18801]	protein_coding
chr1-:151413403-151413448	UUAGUGU weakly ACACUA hsa-miR-142-3p(6mer-m8) CACUAA ebv-miR-BART1-5p(6mer-m8)	0.9488	1	ENSG00000143442	ENST00000271715	CDS	5.24187	0	4.37815	2	18.9979	10.6382	43.6054	22.4957					POGZ	pogo transposable element with ZNF domain [Source:HGNC Symbol;Acc:18801]	protein_coding
chr1-:152004983-152005034	AAAGUGA weakly UCACUUU hsa-miR-3609(7mer-m8)	0.3314	0.8449	ENSG00000163191	ENST00000271638	3'UTR	26.2094	8.13354	28.458	40	0	0	0	0					S100A11	S100 calcium binding protein A11 [Source:HGNC Symbol;Acc:10488]	protein_coding
chr1-:152005006-152005069	UGGCAGG weakly CCUGCCA hsa-miR-1207-5p(7mer-A1)	0.6146	0.9883	ENSG00000163191	ENST00000271638	3'UTR	20.9675	28.4674	15.3235	8	0	0	0	0					S100A11	S100 calcium binding protein A11 [Source:HGNC Symbol;Acc:10488]	protein_coding
chr1-:152005018-152005078	UUAGUGU weakly ACACUA hsa-miR-142-3p(6mer-m8) CACUAA ebv-miR-BART1-5p(6mer-m8)	0.4765	0.989	ENSG00000163191	ENST00000271638	3'UTR	5.24187	12.2003	6.56722	9	0	0	0	0					S100A11	S100 calcium binding protein A11 [Source:HGNC Symbol;Acc:10488]	protein_coding
chr1-:152005034-152005127	GGGAUGG no CCAUCC hsa-miR-432*(6mer-m8) hsa-miR-1193(6mer)	0.6212	0.8289	ENSG00000163191	ENST00000271638	3'UTR	10.4837	0	37.2143	31	0	1.51974	0	0					S100A11	S100 calcium binding protein A11 [Source:HGNC Symbol;Acc:10488]	protein_coding
chr1-:152006167-152006234	AGAGUGU no ACACUC hsa-miR-122(6mer-m8) hsa-miR-574-5p(6mer) hsa-miR-3659(6mer) CACUCU hsa-miR-759(6mer-m8)	0.625	0.8506	ENSG00000163191	ENST00000271638	CDS	10.4837	4.06677	15.3235	8	1.58316	1.51974	40.2512	19.282					S100A11	S100 calcium binding protein A11 [Source:HGNC Symbol;Acc:10488]	protein_coding
chr1-:153634663-153634718	UCACAAA weakly UUGUGA ebv-miR-BART8*(6mer) hsa-miR-513b(6mer)	0.3417	0.4883	ENSG00000143621	ENST00000361891	3'UTR	0	0	13.1344	12	0	0	0	0					ILF2	interleukin enhancer binding factor 2, 45kDa [Source:HGNC Symbol;Acc:6037]	protein_coding
chr1-:153635720-153635752|153636518-153636563	AUCACAG no CUGUGA hsa-miR-27a(6mer) hsa-miR-27b(6mer) kshv-miR-K12-11*(6mer-m8) hsa-miR-513a-5p(6mer)	0.0586	1	ENSG00000143621	ENST00000361891	CDS	10.4837	8.13354	2.18907	3	0	0	0	0					ILF2	interleukin enhancer binding factor 2, 45kDa [Source:HGNC Symbol;Acc:6037]	protein_coding
chr1-:153640060-153640133	UUUUUAU no	0	0.5	ENSG00000143621	ENST00000361891	CDS	0	0	4.37815	3	39.579	28.8751	20.1256	25.7094					ILF2	interleukin enhancer binding factor 2, 45kDa [Source:HGNC Symbol;Acc:6037]	protein_coding
chr1-:153640108-153640133|153640475-153640514	UUGCACU weakly AGUGCAA hsa-miR-4325(7mer-A1)	0.1169	1	ENSG00000143621	ENST00000361891	CDS	31.4512	44.7345	13.1344	23	0	0	0	0					ILF2	interleukin enhancer binding factor 2, 45kDa [Source:HGNC Symbol;Acc:6037]	protein_coding
chr1-:153640535-153640553|153640928-153640975	AGCAGAA no UUCUGC hsa-miR-298(6mer) UCUGCU hsa-miR-922(6mer-m8)	0.1937	0.9998	ENSG00000143621	ENST00000361891	CDS	26.2094	4.06677	37.2143	47	1.58316	1.51974	0	0					ILF2	interleukin enhancer binding factor 2, 45kDa [Source:HGNC Symbol;Acc:6037]	protein_coding
chr1-:153641024-153641033|153642311-153642341	AUAGAAG no	0.895	0.9675	ENSG00000143621	ENST00000361891	CDS	5.24187	0	2.18907	1	36.4127	31.9146	23.4799	16.0684					ILF2	interleukin enhancer binding factor 2, 45kDa [Source:HGNC Symbol;Acc:6037]	protein_coding
chr1-:153777219-153777268	AUAGCUU no	0.5599	0.9999	ENSG00000143614	ENST00000368655	3'UTR	10.4837	16.2671	80.9958	64	45.9116	44.0725	36.8969	41.7777					GATAD2B	GATA zinc finger domain containing 2B [Source:HGNC Symbol;Acc:30778]	protein_coding
chr1-:153779006-153779050	CACAUUA no UAAUGU hsa-miR-323-3p(6mer) AAUGUG hsa-miR-23a(6mer-m8) hsa-miR-23b(6mer-m8) hsa-miR-130a*(6mer-m8) kshv-miR-K12-3(6mer) hsa-miR-23c(6mer-m8)	0.7211	1	ENSG00000143614	ENST00000368655	3'UTR	0	0	15.3235	19	0	0	0	0					GATAD2B	GATA zinc finger domain containing 2B [Source:HGNC Symbol;Acc:30778]	protein_coding
chr1-:153779151-153779197	UAACAUC no AUGUUA hsa-miR-302c*(6mer-m8) hsa-miR-3143(6mer)	0.5035	0.9306	ENSG00000143614	ENST00000368655	3'UTR	0	0	8.7563	12	1.58316	1.51974	0	0					GATAD2B	GATA zinc finger domain containing 2B [Source:HGNC Symbol;Acc:30778]	protein_coding
chr1-:153780224-153780287	AUUGCAC vertebrate GUGCAAU hsa-miR-25(7mer-m8) hsa-miR-32(7mer-m8) hsa-miR-92a(7mer-m8) hsa-miR-363(7mer-m8) hsa-miR-367(7mer-m8) hsa-miR-92b(7mer-m8)	0.6555	0.7074	ENSG00000143614	ENST00000368655	3'UTR	47.1769	48.8013	32.8361	29	12.6653	13.6777	3.35426	6.42735					GATAD2B	GATA zinc finger domain containing 2B [Source:HGNC Symbol;Acc:30778]	protein_coding
chr1-:153788989-153789061	GAUGGCA no UGCCAU hsa-miR-183(6mer)	0.9078	0.6527	ENSG00000143614	ENST00000368655	CDS	0	0	2.18907	2	15.8316	10.6382	16.7713	32.1367					GATAD2B	GATA zinc finger domain containing 2B [Source:HGNC Symbol;Acc:30778]	protein_coding
chr1-:153902020-153902088	AUUGCAC vertebrate GUGCAAU hsa-miR-25(7mer-m8) hsa-miR-32(7mer-m8) hsa-miR-92a(7mer-m8) hsa-miR-363(7mer-m8) hsa-miR-367(7mer-m8) hsa-miR-92b(7mer-m8)	0.6013	0.7087	ENSG00000198837	ENST00000361217	3'UTR	26.2094	52.868	37.2143	42	4.74948	4.55922	0	0					DENND4B	DENN/MADD domain containing 4B [Source:HGNC Symbol;Acc:29044]	protein_coding
chr1-:153902240-153902291	AGAAUAA no UAUUCU kshv-miR-K12-4-3p(6mer)	0.0276	0.9348	ENSG00000198837	ENST00000361217	3'UTR	0	4.06677	4.37815	4	0	0	10.0628	0					DENND4B	DENN/MADD domain containing 4B [Source:HGNC Symbol;Acc:29044]	protein_coding
chr1-:153904701-153904760	AGAAUAC no GUAUUCU kshv-miR-K12-4-3p(7mer-m8)	0.024	0.9863	ENSG00000198837	ENST00000361217	CDS	0	0	15.3235	6	0	0	0	0					DENND4B	DENN/MADD domain containing 4B [Source:HGNC Symbol;Acc:29044]	protein_coding
chr1-:153921840-153921860|153923735-153923777	GGAAGAC vertebrate GUCUUCC hsa-miR-7(7mer-m8)	0.4163	0.6737	ENSG00000160741	ENST00000368633	CDS	10.4837	12.2003	6.56722	10	4.74948	7.59871	6.70853	6.42735					CRTC2	CREB regulated transcription coactivator 2 [Source:HGNC Symbol;Acc:27301]	protein_coding
chr1-:153924610-153924683	AAAGUGC vertebrate GCACUUU hsa-miR-17(7mer-m8) hsa-miR-20a(7mer-m8) hsa-miR-93(7mer-m8) hsa-miR-106a(7mer-m8) hsa-miR-106b(7mer-m8) hsa-miR-20b(7mer-m8) hsa-miR-526b*(7mer-m8) hsa-miR-519d(7mer-m8)	0.5371	0.7454	ENSG00000160741	ENST00000368633	CDS	99.5956	93.5358	37.2143	27	30.08	12.1579	6.70853	6.42735					CRTC2	CREB regulated transcription coactivator 2 [Source:HGNC Symbol;Acc:27301]	protein_coding
chr1-:153931658-153931716	CUCCCUC weakly GAGGGAG kshv-miR-K12-8*(7mer-m8)	0.6031	0.9943	ENSG00000143570	ENST00000368623	3'UTR	0	0	6.56722	15	0	0	0	0					SLC39A1	solute carrier family 39 (zinc transporter), member 1 [Source:HGNC Symbol;Acc:12876]	protein_coding
chr1-:153931787-153931841	AGCAGCA vertebrate UGCUGCU hsa-miR-15a(7mer-m8) hsa-miR-16(7mer-m8) hsa-miR-15b(7mer-m8) hsa-miR-195(7mer-m8) hsa-miR-424(7mer-m8) hsa-miR-497(7mer-m8)	0.4406	0.8861	ENSG00000143570	ENST00000368623	3'UTR	5.24187	4.06677	10.9454	3	0	1.51974	0	3.21367					SLC39A1	solute carrier family 39 (zinc transporter), member 1 [Source:HGNC Symbol;Acc:12876]	protein_coding
chr1-:153932233-153932305	AUAGUGU no ACACUA hsa-miR-142-3p(6mer-m8)	0.8188	0.8182	ENSG00000143570	ENST00000368623	3'UTR	5.24187	8.13354	8.7563	7	0	0	0	0					SLC39A1	solute carrier family 39 (zinc transporter), member 1 [Source:HGNC Symbol;Acc:12876]	protein_coding
chr1-:153932276-153932344	CAGUCAA no	0.2596	0.5369	ENSG00000143570	ENST00000368623	3'UTR	0	4.06677	10.9454	2	0	0	0	0					SLC39A1	solute carrier family 39 (zinc transporter), member 1 [Source:HGNC Symbol;Acc:12876]	protein_coding
chr1-:154179242-154179286	UGCAUUG vertebrate CAAUGCA hsa-miR-33a(7mer-m8) hsa-miR-33b(7mer-m8)	0.5999	0.4032	ENSG00000143612	ENST00000368521	3'UTR	15.7256	8.13354	0	2	1.58316	0	0	0					C1orf43	Uncharacterized protein C1orf43 (Hepatitis C virus NS5A-transactivated protein 4)(HCV NS5A-transactivated protein 4)(Protein NICE-3)(S863-3) [Source:UniProtKB/Swiss-Prot;Acc:Q9BWL3]	protein_coding
chr1-:154179326-154179390	AGAGUGU no ACACUC hsa-miR-122(6mer-m8) hsa-miR-574-5p(6mer) hsa-miR-3659(6mer) CACUCU hsa-miR-759(6mer-m8)	0.6696	0.8546	ENSG00000143612	ENST00000368521	3'UTR	15.7256	20.3339	10.9454	0	0	0	0	0					C1orf43	Uncharacterized protein C1orf43 (Hepatitis C virus NS5A-transactivated protein 4)(HCV NS5A-transactivated protein 4)(Protein NICE-3)(S863-3) [Source:UniProtKB/Swiss-Prot;Acc:Q9BWL3]	protein_coding
chr1-:154179528-154179579	UGCACAA no	0.2378	0.4472	ENSG00000143612	ENST00000368521	3'UTR	15.7256	0	2.18907	5	1.58316	0	0	0					C1orf43	Uncharacterized protein C1orf43 (Hepatitis C virus NS5A-transactivated protein 4)(HCV NS5A-transactivated protein 4)(Protein NICE-3)(S863-3) [Source:UniProtKB/Swiss-Prot;Acc:Q9BWL3]	protein_coding
chr1-:154184977-154185050	UAGUGUU weakly AACACUA kshv-miR-K12-10a(7mer-A1) hsa-miR-4255(7mer-A1)	0	0.9958	ENSG00000143612	ENST00000368521	CDS	47.1769	40.6677	39.4033	40	0	1.51974	0	0					C1orf43	Uncharacterized protein C1orf43 (Hepatitis C virus NS5A-transactivated protein 4)(HCV NS5A-transactivated protein 4)(Protein NICE-3)(S863-3) [Source:UniProtKB/Swiss-Prot;Acc:Q9BWL3]	protein_coding
chr1-:154521290-154521348	AGCAGCA vertebrate UGCUGCU hsa-miR-15a(7mer-m8) hsa-miR-16(7mer-m8) hsa-miR-15b(7mer-m8) hsa-miR-195(7mer-m8) hsa-miR-424(7mer-m8) hsa-miR-497(7mer-m8)	0.4978	0.979	ENSG00000160714	ENST00000292211	3'UTR	10.4837	8.13354	8.7563	18	9.49896	10.6382	23.4799	9.64102					UBE2Q1	ubiquitin-conjugating enzyme E2Q family member 1 [Source:HGNC Symbol;Acc:15698]	protein_coding
chr1-:154521350-154521387	AGCAGCA vertebrate UGCUGCU hsa-miR-15a(7mer-m8) hsa-miR-16(7mer-m8) hsa-miR-15b(7mer-m8) hsa-miR-195(7mer-m8) hsa-miR-424(7mer-m8) hsa-miR-497(7mer-m8)	0.2764	0.9868	ENSG00000160714	ENST00000292211	3'UTR	41.935	32.5342	52.5378	42	1.58316	1.51974	0	0					UBE2Q1	ubiquitin-conjugating enzyme E2Q family member 1 [Source:HGNC Symbol;Acc:15698]	protein_coding
chr1-:154524610-154524659|154524879-154524892	GUGCAAA vertebrate UUUGCAC hsa-miR-19a(7mer-m8) hsa-miR-19b(7mer-m8)	0.8503	0.8772	ENSG00000160714	ENST00000292211	CDS	36.6931	28.4674	10.9454	8	0	0	0	0					UBE2Q1	ubiquitin-conjugating enzyme E2Q family member 1 [Source:HGNC Symbol;Acc:15698]	protein_coding
chr1-:154554778-154554827	AUGCACA no GUGCAU hsa-miR-501-3p(6mer) hsa-miR-502-3p(6mer)	0.4595	0.9327	ENSG00000160710	ENST00000368474	3'UTR	0	28.4674	2.18907	6	4.74948	0	0	0					ADAR	adenosine deaminase, RNA-specific [Source:HGNC Symbol;Acc:225]	protein_coding
chr1-:154554877-154554921	AAAGUGA weakly UCACUUU hsa-miR-3609(7mer-m8)	0.6017	0.7673	ENSG00000160710	ENST00000368474	3'UTR	10.4837	12.2003	17.5126	6	0	3.03948	0	0					ADAR	adenosine deaminase, RNA-specific [Source:HGNC Symbol;Acc:225]	protein_coding
chr1-:154555139-154555198	UAAUGCC vertebrate GGCAUUA hsa-miR-365(7mer-A1)	0.1462	0.9124	ENSG00000160710	ENST00000368474	3'UTR	15.7256	12.2003	13.1344	15	3.16632	0	0	0					ADAR	adenosine deaminase, RNA-specific [Source:HGNC Symbol;Acc:225]	protein_coding
chr1-:154556086-154556139	AAGUAUG no AUACUU hsa-miR-548l(6mer-m8)	0.7415	0.3379	ENSG00000160710	ENST00000368474	3'UTR	0	0	0	0	11.0821	7.59871	0	0					ADAR	adenosine deaminase, RNA-specific [Source:HGNC Symbol;Acc:225]	protein_coding
chr1-:154569287-154569361	AGCAGCA vertebrate UGCUGCU hsa-miR-15a(7mer-m8) hsa-miR-16(7mer-m8) hsa-miR-15b(7mer-m8) hsa-miR-195(7mer-m8) hsa-miR-424(7mer-m8) hsa-miR-497(7mer-m8)	0.5311	0.9784	ENSG00000160710	ENST00000368474	CDS	5.24187	12.2003	21.8907	18	0	0	0	0					ADAR	adenosine deaminase, RNA-specific [Source:HGNC Symbol;Acc:225]	protein_coding
chr1-:154573651-154573701	ACUGUAG weakly CUACAGU kshv-miR-K12-2(7mer-m8) hsa-miR-1183(7mer-m8)	0.1148	0.9997	ENSG00000160710	ENST00000368474	CDS	0	0	24.0798	31	1.58316	0	0	3.21367				x	ADAR	adenosine deaminase, RNA-specific [Source:HGNC Symbol;Acc:225]	protein_coding
chr1-:154573898-154573958	UUACAGG weakly CCUGUAA kshv-miR-K12-1(7mer-m8)	0.1618	0.7005	ENSG00000160710	ENST00000368474	CDS	0	0	28.458	21	6.33264	6.07896	0	0					ADAR	adenosine deaminase, RNA-specific [Source:HGNC Symbol;Acc:225]	protein_coding
chr1-:154917219-154917294	UCACAGU vertebrate ACUGUGA hsa-miR-27a(7mer-m8) hsa-miR-27b(7mer-m8) hsa-miR-128(7mer-A1) hsa-miR-3681*(7mer-A1)	0.0713	0.6008	ENSG00000163346	ENST00000368463	3'UTR	0	0	2.18907	4	23.7474	21.2764	0	0					PBXIP1	pre-B-cell leukemia homeobox interacting protein 1 [Source:HGNC Symbol;Acc:21199]	protein_coding
chr1-:154917330-154917394	AAAGUGA weakly UCACUUU hsa-miR-3609(7mer-m8)	0.4176	0.9752	ENSG00000163346	ENST00000368463	3'UTR	94.3537	138.27	122.588	131	53.8274	48.6317	6.70853	12.8547					PBXIP1	pre-B-cell leukemia homeobox interacting protein 1 [Source:HGNC Symbol;Acc:21199]	protein_coding
chr1-:154929515-154929569	UACAAAA no UUUGUA hsa-miR-524-5p(6mer) hsa-miR-520d-5p(6mer) hsa-miR-1283(6mer-m8) ebv-miR-BART22(6mer)	0.0487	0.8859	ENSG00000163348	ENST00000368457	3'UTR	20.9675	4.06677	6.56722	11	0	0	0	0					PYGO2	pygopus homolog 2 (Drosophila) [Source:HGNC Symbol;Acc:30257]	protein_coding
chr1-:154929571-154929621	AGUAGUG no CACUAC hsa-miR-142-3p(6mer) ACUACU hsa-miR-199a-3p(6mer-m8) hsa-miR-199b-3p(6mer-m8) hsa-miR-1244(6mer) hsa-miR-3129(6mer-m8)	0.8042	0.9594	ENSG00000163348	ENST00000368457	3'UTR	20.9675	36.6009	19.7017	27	15.8316	10.6382	6.70853	19.282					PYGO2	pygopus homolog 2 (Drosophila) [Source:HGNC Symbol;Acc:30257]	protein_coding
chr1-:154935479-154935534	UAGAGUA no	0.6195	0.5743	ENSG00000160691	ENST00000448116	3'UTR	0	0	15.3235	18	9.49896	1.51974	10.0628	9.64102					SHC1	SHC (Src homology 2 domain containing) transforming protein 1 [Source:HGNC Symbol;Acc:10840]	protein_coding
chr1-:155141885-155141944	ACAUUCA vertebrate UGAAUGU hsa-miR-181a(7mer-m8) hsa-miR-181b(7mer-m8) hsa-miR-181c(7mer-m8) hsa-miR-181d(7mer-m8) hsa-miR-4262(7mer-m8)	0.5288	0.9997	ENSG00000163463	ENST00000490672	protein_coding	5.24187	20.3339	13.1344	27	0	4.55922	3.35426	3.21367					KRTCAP2	keratinocyte associated protein 2 [Source:HGNC Symbol;Acc:28942]	protein_coding
chr1-:155225867-155225937	UCACAGU vertebrate ACUGUGA hsa-miR-27a(7mer-m8) hsa-miR-27b(7mer-m8) hsa-miR-128(7mer-A1) hsa-miR-3681*(7mer-A1)	0.1695	0.9422	ENSG00000116521	ENST00000355379	3'UTR	20.9675	8.13354	19.7017	10	0	0	0	0					SCAMP3	secretory carrier membrane protein 3 [Source:HGNC Symbol;Acc:10565]	protein_coding
chr1-:155227088-155227168	GAAGAAA no UUCUUC hsa-miR-3185(6mer)	0.4909	0.5256	ENSG00000116521	ENST00000355379	CDS	5.24187	0	4.37815	3	0	0	0	0					SCAMP3	secretory carrier membrane protein 3 [Source:HGNC Symbol;Acc:10565]	protein_coding
chr1-:155227427-155227448|155228616-155228658	GAGGUAG vertebrate CUACCUC hsa-let-7a(7mer-m8) hsa-let-7b(7mer-m8) hsa-let-7c(7mer-m8) hsa-let-7d(7mer-m8) hsa-let-7e(7mer-m8) hsa-let-7f(7mer-m8) hsa-miR-98(7mer-m8) hsa-let-7g(7mer-m8) hsa-let-7i(7mer-m8)	0.4727	0.806	ENSG00000116521	ENST00000355379	CDS	0	8.13354	21.8907	7	3.16632	9.11845	3.35426	0					SCAMP3	secretory carrier membrane protein 3 [Source:HGNC Symbol;Acc:10565]	protein_coding
chr1-:155239365-155239424	AUAGUCU no	0.0212	1	ENSG00000176444	ENST00000368361	CDS	0	0	2.18907	1	4.74948	4.55922	16.7713	6.42735					CLK2	CDC-like kinase 2 [Source:HGNC Symbol;Acc:2069]	protein_coding
chr1-:155305184-155305255	AGCAGCA vertebrate UGCUGCU hsa-miR-15a(7mer-m8) hsa-miR-16(7mer-m8) hsa-miR-15b(7mer-m8) hsa-miR-195(7mer-m8) hsa-miR-424(7mer-m8) hsa-miR-497(7mer-m8)	0.678	0.9007	ENSG00000116539	ENST00000368346	3'UTR	0	8.13354	6.56722	13	68.0759	59.2699	57.0225	54.6324					ASH1L	ash1 (absent, small, or homeotic)-like (Drosophila) [Source:HGNC Symbol;Acc:19088]	protein_coding
chr1-:155305267-155305320	UGUAGUG vertebrate CACUACA hsa-miR-142-3p(7mer-A1)	0.7919	0.8585	ENSG00000116539	ENST00000368346	3'UTR	15.7256	28.4674	17.5126	13	1.58316	3.03948	0	0					ASH1L	ash1 (absent, small, or homeotic)-like (Drosophila) [Source:HGNC Symbol;Acc:19088]	protein_coding
chr1-:155306339-155306417	CCCUGGA weakly UCCAGGG hsa-miR-4308(7mer-m8)	0.7318	0.9839	ENSG00000116539	ENST00000368346	3'UTR	15.7256	4.06677	6.56722	19	0	1.51974	0	0					ASH1L	ash1 (absent, small, or homeotic)-like (Drosophila) [Source:HGNC Symbol;Acc:19088]	protein_coding
chr1-:155306439-155306495	ACUGUAC no GUACAG hsa-miR-486-5p(6mer-m8) UACAGU kshv-miR-K12-2(6mer) hsa-miR-1183(6mer)	0.9095	1	ENSG00000116539	ENST00000368346	3'UTR	0	0	43.7815	44	39.579	24.3159	57.0225	48.2051					ASH1L	ash1 (absent, small, or homeotic)-like (Drosophila) [Source:HGNC Symbol;Acc:19088]	protein_coding
chr1-:155306483-155306510	UAGUGUU weakly AACACUA kshv-miR-K12-10a(7mer-A1) hsa-miR-4255(7mer-A1)	0.8287	0.6748	ENSG00000116539	ENST00000368346	3'UTR	15.7256	48.8013	45.9706	31	25.3305	15.1974	3.35426	6.42735					ASH1L	ash1 (absent, small, or homeotic)-like (Drosophila) [Source:HGNC Symbol;Acc:19088]	protein_coding
chr1-:155306530-155306595	UGUAGUG vertebrate CACUACA hsa-miR-142-3p(7mer-A1)	0.9661	0.8464	ENSG00000116539	ENST00000368346	3'UTR	31.4512	48.8013	24.0798	40	194.729	165.652	130.816	80.3418					ASH1L	ash1 (absent, small, or homeotic)-like (Drosophila) [Source:HGNC Symbol;Acc:19088]	protein_coding
chr1-:155306631-155306678	UUGCACA no GUGCAA hsa-miR-25(6mer-m8) hsa-miR-32(6mer-m8) hsa-miR-92a(6mer-m8) hsa-miR-363(6mer-m8) hsa-miR-367(6mer-m8) hsa-miR-507(6mer-m8) hsa-miR-92b(6mer-m8) hsa-miR-557(6mer-m8)	0.2388	0.9062	ENSG00000116539	ENST00000368346	3'UTR	0	4.06677	8.7563	7	0	0	0	0					ASH1L	ash1 (absent, small, or homeotic)-like (Drosophila) [Source:HGNC Symbol;Acc:19088]	protein_coding
chr1-:155307298-155307362	UGUCAAC mammals GUUGACA hsa-miR-505(7mer-A1)	0.1527	1	ENSG00000116539	ENST00000368346	3'UTR	0	0	6.56722	8	0	0	13.4171	6.42735					ASH1L	ash1 (absent, small, or homeotic)-like (Drosophila) [Source:HGNC Symbol;Acc:19088]	protein_coding
chr1-:155408485-155408555	AUUGCAC vertebrate GUGCAAU hsa-miR-25(7mer-m8) hsa-miR-32(7mer-m8) hsa-miR-92a(7mer-m8) hsa-miR-363(7mer-m8) hsa-miR-367(7mer-m8) hsa-miR-92b(7mer-m8)	0.8018	0.8055	ENSG00000116539	ENST00000368346	CDS	267.336	329.409	89.7521	105	4.74948	3.03948	0	3.21367					ASH1L	ash1 (absent, small, or homeotic)-like (Drosophila) [Source:HGNC Symbol;Acc:19088]	protein_coding
chr1-:155447700-155447785	UGUGCAG weakly CUGCACA hsa-miR-143*(7mer-A1)	0.0434	0.6731	ENSG00000116539	ENST00000368346	CDS	10.4837	4.06677	4.37815	7	1.58316	6.07896	0	0					ASH1L	ash1 (absent, small, or homeotic)-like (Drosophila) [Source:HGNC Symbol;Acc:19088]	protein_coding
chr1-:155447919-155447973	ACAGUCA no GACUGU hsa-miR-212(6mer-m8) hsa-miR-132(6mer-m8)	0.1248	0.5145	ENSG00000116539	ENST00000368346	CDS	0	4.06677	6.56722	5	0	0	0	0					ASH1L	ash1 (absent, small, or homeotic)-like (Drosophila) [Source:HGNC Symbol;Acc:19088]	protein_coding
chr1-:155448336-155448375	UAUGGUA no ACCAUA hsa-miR-584(6mer)	0.9749	1	ENSG00000116539	ENST00000368346	CDS	0	0	21.8907	15	90.2401	59.2699	80.5024	86.7692					ASH1L	ash1 (absent, small, or homeotic)-like (Drosophila) [Source:HGNC Symbol;Acc:19088]	protein_coding
chr1-:155448456-155448540	AGCAGCU weakly AGCUGCU hsa-miR-646(7mer-m8)	0.4028	0.9555	ENSG00000116539	ENST00000368346	CDS	5.24187	8.13354	8.7563	4	3.16632	3.03948	0	0					ASH1L	ash1 (absent, small, or homeotic)-like (Drosophila) [Source:HGNC Symbol;Acc:19088]	protein_coding
chr1-:155448616-155448683	UGUAGUG vertebrate CACUACA hsa-miR-142-3p(7mer-A1)	0.615	0.9852	ENSG00000116539	ENST00000368346	CDS	26.2094	16.2671	19.7017	10	34.8295	31.9146	10.0628	12.8547					ASH1L	ash1 (absent, small, or homeotic)-like (Drosophila) [Source:HGNC Symbol;Acc:19088]	protein_coding
chr1-:155448649-155448712	AAGGAUG no CAUCCU kshv-miR-K12-5(6mer) hsa-miR-1265(6mer) hsa-miR-3605-5p(6mer-m8) AUCCUU hsa-miR-541*(6mer)	0.197	1	ENSG00000116539	ENST00000368346	CDS	0	4.06677	0	0	6.33264	10.6382	0	3.21367					ASH1L	ash1 (absent, small, or homeotic)-like (Drosophila) [Source:HGNC Symbol;Acc:19088]	protein_coding
chr1-:155449563-155449641	AUUGCAC vertebrate GUGCAAU hsa-miR-25(7mer-m8) hsa-miR-32(7mer-m8) hsa-miR-92a(7mer-m8) hsa-miR-363(7mer-m8) hsa-miR-367(7mer-m8) hsa-miR-92b(7mer-m8)	0.1819	0.9634	ENSG00000116539	ENST00000368346	CDS	10.4837	4.06677	13.1344	8	9.49896	6.07896	3.35426	0					ASH1L	ash1 (absent, small, or homeotic)-like (Drosophila) [Source:HGNC Symbol;Acc:19088]	protein_coding
chr1-:155449684-155449742	AUUUUGC no GCAAAA hsa-miR-19a*(6mer-m8) hsa-miR-19b-1*(6mer-m8) hsa-miR-19b-2*(6mer-m8) hsa-miR-129-5p(6mer-m8)	0.946	1	ENSG00000116539	ENST00000368346	CDS	0	0	4.37815	2	56.9937	68.3884	0	0					ASH1L	ash1 (absent, small, or homeotic)-like (Drosophila) [Source:HGNC Symbol;Acc:19088]	protein_coding
chr1-:155451017-155451080	AGCACCU no AGGUGC hsa-miR-500a*(6mer-m8) GGUGCU hsa-miR-29a(6mer) hsa-miR-29b(6mer) hsa-miR-29c(6mer) ebv-miR-BART1-3p(6mer) kshv-miR-K12-1*(6mer-m8) hsa-miR-3065-3p(6mer-m8) hsa-miR-3663-3p(6mer-m8)	0.622	0.9313	ENSG00000116539	ENST00000368346	CDS	5.24187	12.2003	2.18907	5	0	0	0	0					ASH1L	ash1 (absent, small, or homeotic)-like (Drosophila) [Source:HGNC Symbol;Acc:19088]	protein_coding
chr1-:155451070-155451117	AAGUGCA weakly UGCACUU hsa-miR-519c-3p(7mer-m8) hsa-miR-519b-3p(7mer-m8) hsa-miR-519a(7mer-m8)	0.1165	0.521	ENSG00000116539	ENST00000368346	CDS	10.4837	16.2671	21.8907	22	0	3.03948	0	0					ASH1L	ash1 (absent, small, or homeotic)-like (Drosophila) [Source:HGNC Symbol;Acc:19088]	protein_coding
chr1-:155451651-155451704	UGUAGUG vertebrate CACUACA hsa-miR-142-3p(7mer-A1)	0.2549	0.7063	ENSG00000116539	ENST00000368346	CDS	10.4837	8.13354	4.37815	6	0	0	0	0					ASH1L	ash1 (absent, small, or homeotic)-like (Drosophila) [Source:HGNC Symbol;Acc:19088]	protein_coding
chr1-:155451696-155451762	UGUAGUG vertebrate CACUACA hsa-miR-142-3p(7mer-A1)	0.4364	0.8607	ENSG00000116539	ENST00000368346	CDS	47.1769	16.2671	28.458	44	0	0	0	0					ASH1L	ash1 (absent, small, or homeotic)-like (Drosophila) [Source:HGNC Symbol;Acc:19088]	protein_coding
chr1-:155451896-155451949	UGUAGUG vertebrate CACUACA hsa-miR-142-3p(7mer-A1)	0.4242	0.8682	ENSG00000116539	ENST00000368346	CDS	36.6931	52.868	30.647	26	0	0	0	0					ASH1L	ash1 (absent, small, or homeotic)-like (Drosophila) [Source:HGNC Symbol;Acc:19088]	protein_coding
chr1-:155451946-155451999	GGAAGAC vertebrate GUCUUCC hsa-miR-7(7mer-m8)	0.1537	1	ENSG00000116539	ENST00000368346	CDS	10.4837	12.2003	19.7017	21	0	0	0	0					ASH1L	ash1 (absent, small, or homeotic)-like (Drosophila) [Source:HGNC Symbol;Acc:19088]	protein_coding
chr1-:155452003-155452067	UAAUGCU vertebrate AGCAUUA hsa-miR-155(7mer-m8) kshv-miR-K12-11(7mer-m8)	0.4567	1	ENSG00000116539	ENST00000368346	CDS	0	0	10.9454	27	1.58316	1.51974	0	0					ASH1L	ash1 (absent, small, or homeotic)-like (Drosophila) [Source:HGNC Symbol;Acc:19088]	protein_coding
chr1-:155868358-155868394	UCACUAG no CUAGUGA ebv-miR-BART21-5p(7mer-A1)	0.8931	1	ENSG00000143622	ENST00000368323	3'UTR	0	8.13354	6.56722	1	87.0738	101.823	0	0					RIT1	Ras-like without CAAX 1 [Source:HGNC Symbol;Acc:10023]	protein_coding
chr1-:155882887-155882953	GCCAGCC weakly GGCUGGC hsa-miR-3194(7mer-m8)	0.6288	0.9999	ENSG00000132680	ENST00000368320	3'UTR	20.9675	28.4674	6.56722	10	0	3.03948	0	0					KIAA0907	KIAA0907 [Source:HGNC Symbol;Acc:29145]	protein_coding
chr1-:155887412-155887463	AGCAGCA vertebrate UGCUGCU hsa-miR-15a(7mer-m8) hsa-miR-16(7mer-m8) hsa-miR-15b(7mer-m8) hsa-miR-195(7mer-m8) hsa-miR-424(7mer-m8) hsa-miR-497(7mer-m8)	0.8571	1	ENSG00000132680	ENST00000368320	CDS	5.24187	16.2671	19.7017	3	3.16632	1.51974	6.70853	3.21367					KIAA0907	KIAA0907 [Source:HGNC Symbol;Acc:29145]	protein_coding
chr1-:155917316-155917413	GGAUGAG weakly CUCAUCC hsa-miR-1255a(7mer-m8) hsa-miR-1255b(7mer-m8)	0.6818	1	ENSG00000116584	ENST00000435736	3'UTR	5.24187	0	0	3	0	0	0	0					ARHGEF2	Rho/Rac guanine nucleotide exchange factor (GEF) 2 [Source:HGNC Symbol;Acc:682]	protein_coding
chr1-:155917368-155917436	UGAUCCC no GGGAUCA kshv-miR-K12-7(7mer-A1)	0.1738	0.5508	ENSG00000116584	ENST00000435736	3'UTR	5.24187	4.06677	24.0798	22	1.58316	0	10.0628	3.21367					ARHGEF2	Rho/Rac guanine nucleotide exchange factor (GEF) 2 [Source:HGNC Symbol;Acc:682]	protein_coding
chr1-:155917519-155917575	CCAGGGG no CCCCUG hsa-miR-1909(6mer-m8) CCCUGG hsa-miR-1915(6mer-m8)	0.6261	0.6767	ENSG00000116584	ENST00000435736	3'UTR	0	0	8.7563	17	0	0	0	0					ARHGEF2	Rho/Rac guanine nucleotide exchange factor (GEF) 2 [Source:HGNC Symbol;Acc:682]	protein_coding
chr1-:155917559-155917636	GAUCCCA no UGGGAUC kshv-miR-K12-7(7mer-m8)	0.7119	1	ENSG00000116584	ENST00000435736	3'UTR	0	4.06677	80.9958	105	7.9158	4.55922	16.7713	9.64102					ARHGEF2	Rho/Rac guanine nucleotide exchange factor (GEF) 2 [Source:HGNC Symbol;Acc:682]	protein_coding
chr1-:156213980-156214038	AGCAGCA vertebrate UGCUGCU hsa-miR-15a(7mer-m8) hsa-miR-16(7mer-m8) hsa-miR-15b(7mer-m8) hsa-miR-195(7mer-m8) hsa-miR-424(7mer-m8) hsa-miR-497(7mer-m8)	0.9934	0.9872	ENSG00000160781	ENST00000335852	CDS	0	4.06677	4.37815	8	98.1559	85.1055	50.314	51.4188					PAQR6	progestin and adipoQ receptor family member VI [Source:HGNC Symbol;Acc:30132]	protein_coding
chr1-:156280380-156280453	UCCACCA no	0.1865	0.7188	ENSG00000163468	ENST00000443745	CDS	0	0	28.458	22	0	0	0	0					CCT3	chaperonin containing TCP1, subunit 3 (gamma) [Source:HGNC Symbol;Acc:1616]	protein_coding
chr1-:156281876-156281927	UCAGUGA weakly UCACUGA hsa-miR-4276(7mer-m8)	0.8474	0.9967	ENSG00000163468	ENST00000443745	CDS	10.4837	4.06677	0	0	36.4127	36.4738	0	0					CCT3	chaperonin containing TCP1, subunit 3 (gamma) [Source:HGNC Symbol;Acc:1616]	protein_coding
chr1-:156290673-156290741	ACAGCAU no AUGCUG hsa-miR-103(6mer-m8) hsa-miR-107(6mer-m8) hsa-miR-338-3p(6mer-m8) hsa-miR-4310(6mer) UGCUGU hsa-miR-3120(6mer)	0.5234	0.8204	ENSG00000163468	ENST00000443745	CDS	10.4837	24.4006	6.56722	1	0	0	0	0					CCT3	chaperonin containing TCP1, subunit 3 (gamma) [Source:HGNC Symbol;Acc:1616]	protein_coding
chr1-:156290727-156290805	GUAGUAA no UUACUA hsa-miR-628-3p(6mer-m8)	0.7794	0.9998	ENSG00000163468	ENST00000443745	CDS	0	0	19.7017	9	44.3285	39.5133	16.7713	25.7094					CCT3	chaperonin containing TCP1, subunit 3 (gamma) [Source:HGNC Symbol;Acc:1616]	protein_coding
chr1-:156303337-156303386	AGAAUAA no UAUUCU kshv-miR-K12-4-3p(6mer)	0.6921	1	ENSG00000163468	ENST00000443745	CDS	5.24187	16.2671	52.5378	85	25.3305	21.2764	13.4171	3.21367					CCT3	chaperonin containing TCP1, subunit 3 (gamma) [Source:HGNC Symbol;Acc:1616]	protein_coding
chr1-:156305617-156305665	GGCAGCA no UGCUGC hsa-miR-15a(6mer-m8) hsa-miR-16(6mer-m8) hsa-miR-103(6mer) hsa-miR-107(6mer) hsa-miR-15b(6mer-m8) hsa-miR-195(6mer-m8) hsa-miR-424(6mer-m8) hsa-miR-497(6mer-m8) GCUGCC hsa-miR-885-3p(6mer)	0.9591	1	ENSG00000163468	ENST00000443745	CDS	5.24187	36.6009	6.56722	8	102.905	145.895	46.9597	12.8547					CCT3	chaperonin containing TCP1, subunit 3 (gamma) [Source:HGNC Symbol;Acc:1616]	protein_coding
chr1-:156433552-156433587	UAGUGAA weakly UUCACUA hsa-miR-3606(7mer-m8)	0.2228	0.9995	ENSG00000116604	ENST00000348159	3'UTR	5.24187	12.2003	50.3487	57	14.2484	10.6382	26.8341	28.9231					MEF2D	myocyte enhancer factor 2D [Source:HGNC Symbol;Acc:6997]	protein_coding
chr1-:156435342-156435408	UUGCACA no GUGCAA hsa-miR-25(6mer-m8) hsa-miR-32(6mer-m8) hsa-miR-92a(6mer-m8) hsa-miR-363(6mer-m8) hsa-miR-367(6mer-m8) hsa-miR-507(6mer-m8) hsa-miR-92b(6mer-m8) hsa-miR-557(6mer-m8)	0.3985	1	ENSG00000116604	ENST00000348159	3'UTR	41.935	20.3339	4.37815	12	0	0	0	0					MEF2D	myocyte enhancer factor 2D [Source:HGNC Symbol;Acc:6997]	protein_coding
chr1-:156435438-156435496	AAAGUAC weakly GUACUUU hsa-miR-548k(7mer-m8)	0.608	1	ENSG00000116604	ENST00000348159	3'UTR	26.2094	24.4006	10.9454	7	0	0	0	0					MEF2D	myocyte enhancer factor 2D [Source:HGNC Symbol;Acc:6997]	protein_coding
chr1-:156435985-156436040	UACAGUA vertebrate UACUGUA hsa-miR-101(7mer-A1) hsa-miR-144(7mer-A1)	0.1663	0.8916	ENSG00000116604	ENST00000348159	3'UTR	0	0	48.1596	55	0	0	0	3.21367					MEF2D	myocyte enhancer factor 2D [Source:HGNC Symbol;Acc:6997]	protein_coding
chr1-:156436134-156436202	UACAGUA vertebrate UACUGUA hsa-miR-101(7mer-A1) hsa-miR-144(7mer-A1)	0.3841	0.612	ENSG00000116604	ENST00000348159	3'UTR	5.24187	0	13.1344	11	0	0	0	0					MEF2D	myocyte enhancer factor 2D [Source:HGNC Symbol;Acc:6997]	protein_coding
chr1-:156436540-156436616	AUUGCAC vertebrate GUGCAAU hsa-miR-25(7mer-m8) hsa-miR-32(7mer-m8) hsa-miR-92a(7mer-m8) hsa-miR-363(7mer-m8) hsa-miR-367(7mer-m8) hsa-miR-92b(7mer-m8)	0.1346	0.8994	ENSG00000116604	ENST00000348159	3'UTR	36.6931	40.6677	19.7017	18	0	0	0	0					MEF2D	myocyte enhancer factor 2D [Source:HGNC Symbol;Acc:6997]	protein_coding
chr1-:156436785-156436816	UGCAGCA vertebrate UGCUGCA hsa-miR-103(7mer-A1) hsa-miR-107(7mer-A1)	0.6649	1	ENSG00000116604	ENST00000348159	3'UTR	10.4837	12.2003	2.18907	2	0	0	0	0					MEF2D	myocyte enhancer factor 2D [Source:HGNC Symbol;Acc:6997]	protein_coding
chr1-:156436985-156437035	UUUGGUA no ACCAAA hsa-miR-9(6mer-m8)	0.5036	0.5965	ENSG00000116604	ENST00000348159	3'UTR	0	0	0	0	12.6653	9.11845	13.4171	22.4957					MEF2D	myocyte enhancer factor 2D [Source:HGNC Symbol;Acc:6997]	protein_coding
chr1-:156437096-156437169	UGCAGCA vertebrate UGCUGCA hsa-miR-103(7mer-A1) hsa-miR-107(7mer-A1)	0.1526	0.9706	ENSG00000116604	ENST00000348159	3'UTR	41.935	4.06677	19.7017	14	4.74948	6.07896	0	0					MEF2D	myocyte enhancer factor 2D [Source:HGNC Symbol;Acc:6997]	protein_coding
chr1-:156437300-156437377	AAGCACA no	0.1544	0.6037	ENSG00000116604	ENST00000348159	3'UTR	10.4837	4.06677	0	4	0	0	0	0					MEF2D	myocyte enhancer factor 2D [Source:HGNC Symbol;Acc:6997]	protein_coding
chr1-:156444899-156444954	UGGAAGA vertebrate UCUUCCA hsa-miR-7(7mer-A1)	0.0375	0.6357	ENSG00000116604	ENST00000348159	CDS	5.24187	0	0	5	0	0	3.35426	12.8547					MEF2D	myocyte enhancer factor 2D [Source:HGNC Symbol;Acc:6997]	protein_coding
chr1-:156444915-156444962	AGGCCCU no AGGGCC hsa-miR-328(6mer-m8) hsa-miR-1291(6mer)	0.5004	0.4229	ENSG00000116604	ENST00000348159	CDS	0	0	8.7563	5	0	0	0	0					MEF2D	myocyte enhancer factor 2D [Source:HGNC Symbol;Acc:6997]	protein_coding
chr1-:156495225-156495281	UACAGGA weakly CCUGUA kshv-miR-K12-1(6mer-m8)	0.6452	0.8282	ENSG00000183856	ENST00000361170	3'UTR	0	0	17.5126	25	0	0	6.70853	6.42735					IQGAP3	IQ motif containing GTPase activating protein 3 [Source:HGNC Symbol;Acc:20669]	protein_coding
chr1-:156495933-156495997	AGCAGAC no GUCUGC hsa-miR-3166(6mer) UCUGCU hsa-miR-922(6mer-m8)	0.5491	0.6237	ENSG00000183856	ENST00000361170	3'UTR	0	0	8.7563	6	0	0	0	0					IQGAP3	IQ motif containing GTPase activating protein 3 [Source:HGNC Symbol;Acc:20669]	protein_coding
chr1-:156496178-156496262	UUAGUGU weakly ACACUA hsa-miR-142-3p(6mer-m8) CACUAA ebv-miR-BART1-5p(6mer-m8)	0.815	0.7714	ENSG00000183856	ENST00000361170	3'UTR	5.24187	16.2671	89.7521	67	17.4148	12.1579	6.70853	6.42735					IQGAP3	IQ motif containing GTPase activating protein 3 [Source:HGNC Symbol;Acc:20669]	protein_coding
chr1-:156565603-156565641|156565872-156565891	GAUCCCA no UGGGAUC kshv-miR-K12-7(7mer-m8)	0.8881	0.9064	ENSG00000160818	ENST00000368232	CDS	0	0	19.7017	13	0	0	0	0				x	GPATCH4	G patch domain containing 4 [Source:HGNC Symbol;Acc:25982]	protein_coding
chr1-:156692713-156692757	AGGAUGC no GCAUCCU kshv-miR-K12-5(7mer-m8)	0.9154	0.9637	ENSG00000143319	ENST00000313146	3'UTR	0	0	0	1	9.49896	9.11845	10.0628	3.21367					ISG20L2	interferon stimulated exonuclease gene 20kDa-like 2 [Source:HGNC Symbol;Acc:25745]	protein_coding
chr1-:156692850-156692936	AGCACCA vertebrate UGGUGCU hsa-miR-29a(7mer-m8) hsa-miR-29b(7mer-m8) hsa-miR-29c(7mer-m8)	0.6165	0.9914	ENSG00000143319	ENST00000313146	3'UTR	0	20.3339	4.37815	8	44.3285	41.033	43.6054	28.9231					ISG20L2	interferon stimulated exonuclease gene 20kDa-like 2 [Source:HGNC Symbol;Acc:25745]	protein_coding
chr1-:156707905-156707926|156708134-156708165	AAUGUAG no CUACAU hsa-miR-3668(6mer)	0.511	1	ENSG00000143314	ENST00000434558	CDS	10.4837	0	6.56722	8	41.1621	39.5133	26.8341	19.282					MRPL24	mitochondrial ribosomal protein L24 [Source:HGNC Symbol;Acc:14037]	protein_coding
chr1-:156711972-156712030	GAGGGGC weakly GCCCCUC hsa-miR-423-5p(7mer-m8) hsa-miR-3184(7mer-m8)	0.0075	0.4716	ENSG00000143321	ENST00000357325	3'UTR	0	16.2671	4.37815	6	0	0	0	0					HDGF	hepatoma-derived growth factor [Source:HGNC Symbol;Acc:4856]	protein_coding
chr1-:156711992-156712085	ACUGUAG weakly CUACAGU kshv-miR-K12-2(7mer-m8) hsa-miR-1183(7mer-m8)	0.9487	0.9996	ENSG00000143321	ENST00000357325	3'UTR	0	0	52.5378	54	0	0	0	0				x	HDGF	hepatoma-derived growth factor [Source:HGNC Symbol;Acc:4856]	protein_coding
chr1-:156712041-156712078	GGAAGAG no UCUUCC hsa-miR-7(6mer)	0.6334	0.3914	ENSG00000143321	ENST00000357325	3'UTR	5.24187	12.2003	2.18907	6	0	0	0	0					HDGF	hepatoma-derived growth factor [Source:HGNC Symbol;Acc:4856]	protein_coding
chr1-:156712125-156712194	AUGACAC vertebrate GUGUCAU hsa-miR-425(7mer-m8)	0.372	0.8157	ENSG00000143321	ENST00000357325	3'UTR	10.4837	8.13354	8.7563	6	4.74948	1.51974	3.35426	3.21367					HDGF	hepatoma-derived growth factor [Source:HGNC Symbol;Acc:4856]	protein_coding
chr1-:156712249-156712309	AGCACAC no GUGUGC ebv-miR-BART11-3p(6mer-m8)	0.3573	0.8575	ENSG00000143321	ENST00000357325	3'UTR	10.4837	20.3339	15.3235	10	4.74948	3.03948	3.35426	0					HDGF	hepatoma-derived growth factor [Source:HGNC Symbol;Acc:4856]	protein_coding
chr1-:156712353-156712415	UAUGUCU weakly AGACAUA hsa-miR-654-3p(7mer-A1)	0.4293	0.8156	ENSG00000143321	ENST00000357325	3'UTR	5.24187	8.13354	2.18907	12	1.58316	1.51974	0	3.21367					HDGF	hepatoma-derived growth factor [Source:HGNC Symbol;Acc:4856]	protein_coding
chr1-:156712397-156712461	GGAAAAA weakly UUUUUCC hsa-miR-3148(7mer-m8)	0.305	0.7942	ENSG00000143321	ENST00000357325	3'UTR	5.24187	4.06677	8.7563	4	0	0	0	0					HDGF	hepatoma-derived growth factor [Source:HGNC Symbol;Acc:4856]	protein_coding
chr1-:156713076-156713153	AAAGUGA weakly UCACUUU hsa-miR-3609(7mer-m8)	0.5517	0.7582	ENSG00000143321	ENST00000357325	3'UTR	15.7256	8.13354	8.7563	12	0	3.03948	0	3.21367					HDGF	hepatoma-derived growth factor [Source:HGNC Symbol;Acc:4856]	protein_coding
chr1-:156713155-156713224	AGCAGCA vertebrate UGCUGCU hsa-miR-15a(7mer-m8) hsa-miR-16(7mer-m8) hsa-miR-15b(7mer-m8) hsa-miR-195(7mer-m8) hsa-miR-424(7mer-m8) hsa-miR-497(7mer-m8)	0.0084	0.9513	ENSG00000143321	ENST00000357325	3'UTR	0	16.2671	10.9454	6	0	0	0	0					HDGF	hepatoma-derived growth factor [Source:HGNC Symbol;Acc:4856]	protein_coding
chr1-:156715092-156715140	UAUUUGU no	0.5509	1	ENSG00000143321	ENST00000357325	CDS	0	4.06677	6.56722	6	64.9095	53.1909	63.731	80.3418					HDGF	hepatoma-derived growth factor [Source:HGNC Symbol;Acc:4856]	protein_coding
chr1-:157091597-157091672	UUAGUGA weakly UCACUAA hsa-miR-921(7mer-A1) hsa-miR-3606(7mer-A1)	0.7818	0.8526	ENSG00000117036	ENST00000368192	3'UTR	5.24187	0	4.37815	5	0	1.51974	0	0					ETV3	ets variant 3 [Source:HGNC Symbol;Acc:3492]	protein_coding
chr1-:157092315-157092350	AGCAGCA vertebrate UGCUGCU hsa-miR-15a(7mer-m8) hsa-miR-16(7mer-m8) hsa-miR-15b(7mer-m8) hsa-miR-195(7mer-m8) hsa-miR-424(7mer-m8) hsa-miR-497(7mer-m8)	0.8629	0.9999	ENSG00000117036	ENST00000368192	3'UTR	31.4512	36.6009	48.1596	37	11.0821	16.7172	0	0					ETV3	ets variant 3 [Source:HGNC Symbol;Acc:3492]	protein_coding
chr1-:157095169-157095227	AGCCCUG no CAGGGC hsa-miR-146b-3p(6mer) hsa-miR-874(6mer-m8) hsa-miR-1291(6mer-m8) AGGGCU hsa-miR-129*(6mer) hsa-miR-129-3p(6mer) hsa-miR-1233(6mer-m8)	0.0108	0.915	ENSG00000117036	ENST00000368192	CDS	0	0	6.56722	11	0	0	0	0					ETV3	ets variant 3 [Source:HGNC Symbol;Acc:3492]	protein_coding
chr1-:15818782-15818824	UAAUGCA no GCAUUA hsa-miR-155(6mer) kshv-miR-K12-11(6mer)	0.654	0.9661	ENSG00000132906	ENST00000375890	3'UTR	0	0	4.37815	1	3.16632	6.07896	23.4799	48.2051					CASP9	caspase 9, apoptosis-related cysteine peptidase [Source:HGNC Symbol;Acc:1511]	protein_coding
chr1-:159888182-159888252	GGCAGCA no UGCUGC hsa-miR-15a(6mer-m8) hsa-miR-16(6mer-m8) hsa-miR-103(6mer) hsa-miR-107(6mer) hsa-miR-15b(6mer-m8) hsa-miR-195(6mer-m8) hsa-miR-424(6mer-m8) hsa-miR-497(6mer-m8) GCUGCC hsa-miR-885-3p(6mer)	0.1203	0.6292	ENSG00000158710	ENST00000368097	3'UTR	5.24187	4.06677	6.56722	5	0	0	0	0					TAGLN2	transgelin 2 [Source:HGNC Symbol;Acc:11554]	protein_coding
chr1-:159888250-159888324	CCAGGGG no CCCCUG hsa-miR-1909(6mer-m8) CCCUGG hsa-miR-1915(6mer-m8)	0.6708	0.3758	ENSG00000158710	ENST00000368097	3'UTR	5.24187	8.13354	4.37815	2	0	0	0	0					TAGLN2	transgelin 2 [Source:HGNC Symbol;Acc:11554]	protein_coding
chr1-:159888347-159888433	UUGAUGG no	0.3552	0.489	ENSG00000158710	ENST00000368097	3'UTR	10.4837	0	35.0252	38	18.9979	16.7172	130.816	144.615					TAGLN2	transgelin 2 [Source:HGNC Symbol;Acc:11554]	protein_coding
chr1-:159889562-159889625|159890119-159890127	CAGUGCA vertebrate UGCACUG hsa-miR-148a(7mer-m8) hsa-miR-152(7mer-m8) hsa-miR-148b(7mer-m8)	0.6284	0.8837	ENSG00000158710	ENST00000368097	CDS	89.1118	65.0683	80.9958	81	1.58316	3.03948	0	0					TAGLN2	transgelin 2 [Source:HGNC Symbol;Acc:11554]	protein_coding
chr1-:160061632-160061677	AGCAGCA vertebrate UGCUGCU hsa-miR-15a(7mer-m8) hsa-miR-16(7mer-m8) hsa-miR-15b(7mer-m8) hsa-miR-195(7mer-m8) hsa-miR-424(7mer-m8) hsa-miR-497(7mer-m8)	0.7823	0.9923	ENSG00000162729	ENST00000368086	CDS	10.4837	16.2671	21.8907	8	17.4148	13.6777	16.7713	22.4957					IGSF8	immunoglobulin superfamily, member 8 [Source:HGNC Symbol;Acc:17813]	protein_coding
chr1-:160186760-160186802	GUGCAAA vertebrate UUUGCAC hsa-miR-19a(7mer-m8) hsa-miR-19b(7mer-m8)	0.9618	0.9052	ENSG00000132716	ENST00000368073	3'UTR	47.1769	158.604	194.828	135	55.4106	50.1515	16.7713	19.282					DCAF8	DDB1 and CUL4 associated factor 8 [Source:HGNC Symbol;Acc:24891]	protein_coding
chr1-:160186772-160186847	GAUGGUU no AACCAUC kshv-miR-K12-6-3p(7mer-m8)	0.1302	0.5345	ENSG00000132716	ENST00000368073	3'UTR	0	0	13.1344	2	3.16632	3.03948	0	0					DCAF8	DDB1 and CUL4 associated factor 8 [Source:HGNC Symbol;Acc:24891]	protein_coding
chr1-:160187259-160187308	AAAAAGU no ACUUUU hsa-miR-548n(6mer) hsa-miR-548t(6mer)	0.316	0.9754	ENSG00000132716	ENST00000368073	3'UTR	5.24187	0	6.56722	3	83.9074	100.303	57.0225	57.8461					DCAF8	DDB1 and CUL4 associated factor 8 [Source:HGNC Symbol;Acc:24891]	protein_coding
chr1-:160209074-160209129	UGUGUUA weakly UAACACA hsa-miR-3152(7mer-A1)	0.8548	0.8799	ENSG00000132716	ENST00000475733	protein_coding	0	0	2.18907	1	0	0	43.6054	25.7094					DCAF8	DDB1 and CUL4 associated factor 8 [Source:HGNC Symbol;Acc:24891]	protein_coding
chr1-:160209572-160209645	AAAGUGC vertebrate GCACUUU hsa-miR-17(7mer-m8) hsa-miR-20a(7mer-m8) hsa-miR-93(7mer-m8) hsa-miR-106a(7mer-m8) hsa-miR-106b(7mer-m8) hsa-miR-20b(7mer-m8) hsa-miR-526b*(7mer-m8) hsa-miR-519d(7mer-m8)	0.9072	0.6303	ENSG00000132716	ENST00000368073	CDS	94.3537	162.671	85.3739	103	383.125	335.863	117.399	115.692					DCAF8	DDB1 and CUL4 associated factor 8 [Source:HGNC Symbol;Acc:24891]	protein_coding
chr1-:160259074-160259124	UUAGUGU weakly ACACUA hsa-miR-142-3p(6mer-m8) CACUAA ebv-miR-BART1-5p(6mer-m8)	0.6679	0.9308	ENSG00000122218	ENST00000241704	3'UTR	20.9675	12.2003	26.2689	39	75.9916	79.0265	46.9597	86.7692					COPA	coatomer protein complex, subunit alpha [Source:HGNC Symbol;Acc:2230]	protein_coding
chr1-:160259738-160259775	ACUGUAG weakly CUACAGU kshv-miR-K12-2(7mer-m8) hsa-miR-1183(7mer-m8)	0.6324	0.9994	ENSG00000122218	ENST00000241704	3'UTR	0	0	2.18907	0	3.16632	6.07896	26.8341	28.9231			x		COPA	coatomer protein complex, subunit alpha [Source:HGNC Symbol;Acc:2230]	protein_coding
chr1-:160513226-160513264	UUAGUGU weakly ACACUA hsa-miR-142-3p(6mer-m8) CACUAA ebv-miR-BART1-5p(6mer-m8)	0.016	0.7091	ENSG00000066294	ENST00000368054	3'UTR	167.74	126.07	0	0	0	0	0	0					CD84	CD84 molecule [Source:HGNC Symbol;Acc:1704]	protein_coding
chr1-:160517594-160517658	GUGCAAA vertebrate UUUGCAC hsa-miR-19a(7mer-m8) hsa-miR-19b(7mer-m8)	0.7692	0.9367	ENSG00000066294	ENST00000368054	3'UTR	47.1769	113.87	0	0	0	0	0	0					CD84	CD84 molecule [Source:HGNC Symbol;Acc:1704]	protein_coding
chr1-:160648576-160648651	UAAUGUU weakly AACAUUA hsa-miR-33a*(7mer-A1) hsa-miR-409-3p(7mer-A1)	0.3895	0.9882	ENSG00000117091	ENST00000368046	3'UTR	5.24187	0	4.37815	27	47.4948	54.7107	0	9.64102					CD48	CD48 molecule [Source:HGNC Symbol;Acc:1683]	protein_coding
chr1-:160648689-160648760	UGAAAAU weakly AUUUUCA hsa-miR-3647-3p(7mer-A1)	0.46	0.9992	ENSG00000117091	ENST00000368046	3'UTR	0	0	2.18907	3	14.2484	4.55922	0	0					CD48	CD48 molecule [Source:HGNC Symbol;Acc:1683]	protein_coding
chr1-:160648715-160648778	AGCAGCA vertebrate UGCUGCU hsa-miR-15a(7mer-m8) hsa-miR-16(7mer-m8) hsa-miR-15b(7mer-m8) hsa-miR-195(7mer-m8) hsa-miR-424(7mer-m8) hsa-miR-497(7mer-m8)	0.3252	0.9478	ENSG00000117091	ENST00000368046	3'UTR	0	8.13354	87.563	78	0	3.03948	0	0					CD48	CD48 molecule [Source:HGNC Symbol;Acc:1683]	protein_coding
chr1-:160966014-160966070	AAAGUGA weakly UCACUUU hsa-miR-3609(7mer-m8)	0.5467	0.5611	ENSG00000158769	ENST00000368026	3'UTR	15.7256	12.2003	17.5126	29	0	0	0	0					F11R	F11 receptor [Source:HGNC Symbol;Acc:14685]	protein_coding
chr1-:161009306-161009374	GGGGCAA no UGCCCC hsa-miR-486-3p(6mer)	0.0476	0.9691	ENSG00000158773	ENST00000368021	3'UTR	10.4837	16.2671	15.3235	11	0	0	0	0					USF1	upstream transcription factor 1 [Source:HGNC Symbol;Acc:12593]	protein_coding
chr1-:161009383-161009449	CACAGGA no CCUGUG hsa-miR-513a-5p(6mer-m8)	0.3517	0.5038	ENSG00000158773	ENST00000368021	3'UTR	10.4837	8.13354	8.7563	18	0	0	0	0					USF1	upstream transcription factor 1 [Source:HGNC Symbol;Acc:12593]	protein_coding
chr1-:161017781-161017853	AGCAGCA vertebrate UGCUGCU hsa-miR-15a(7mer-m8) hsa-miR-16(7mer-m8) hsa-miR-15b(7mer-m8) hsa-miR-195(7mer-m8) hsa-miR-424(7mer-m8) hsa-miR-497(7mer-m8)	0.8784	0.998	ENSG00000186517	ENST00000461003	protein_coding	0	16.2671	15.3235	24	4.74948	9.11845	6.70853	3.21367					ARHGAP30	Rho GTPase activating protein 30 [Source:HGNC Symbol;Acc:27414]	protein_coding
chr1-:161070413-161070463	AGAGAAA no UUUCUC hsa-miR-539(6mer) UUCUCU hsa-miR-3123(6mer) hsa-miR-3919(6mer-m8) hsa-miR-3925(6mer)	0.6906	0.4586	ENSG00000143256	ENST00000368010	3'UTR	15.7256	8.13354	2.18907	2	0	0	0	0					PFDN2	prefoldin subunit 2 [Source:HGNC Symbol;Acc:8867]	protein_coding
chr1-:161090949-161091012	AAAGUGC vertebrate GCACUUU hsa-miR-17(7mer-m8) hsa-miR-20a(7mer-m8) hsa-miR-93(7mer-m8) hsa-miR-106a(7mer-m8) hsa-miR-106b(7mer-m8) hsa-miR-20b(7mer-m8) hsa-miR-526b*(7mer-m8) hsa-miR-519d(7mer-m8)	0.0029	0.6246	ENSG00000158796	ENST00000392188	3'UTR	0	20.3339	2.18907	8	0	0	0	0					DEDD	death effector domain containing [Source:HGNC Symbol;Acc:2755]	protein_coding
chr1-:161141522-161141577	AGAAUAC no GUAUUCU kshv-miR-K12-4-3p(7mer-m8)	0.0277	0.9649	ENSG00000158850	ENST00000319769	3'UTR	5.24187	0	28.458	31	4.74948	0	0	0				x	B4GALT3	UDP-Gal:betaGlcNAc beta 1,4- galactosyltransferase, polypeptide 3 [Source:HGNC Symbol;Acc:926]	protein_coding
chr1-:161141539-161141606	AUGAAUU no AAUUCA hsa-miR-183*(6mer)	0.6683	0.9998	ENSG00000158850	ENST00000319769	CDS,3'UTR	0	0	0	0	106.072	132.217	0	0					B4GALT3	UDP-Gal:betaGlcNAc beta 1,4- galactosyltransferase, polypeptide 3 [Source:HGNC Symbol;Acc:926]	protein_coding
chr1-:161144949-161145018|161145597-161145611	GAUGGCA no UGCCAU hsa-miR-183(6mer)	0.9217	0.7771	ENSG00000158850	ENST00000319769	CDS	0	0	43.7815	38	4.74948	6.07896	0	0					B4GALT3	UDP-Gal:betaGlcNAc beta 1,4- galactosyltransferase, polypeptide 3 [Source:HGNC Symbol;Acc:926]	protein_coding
chr1-:161275284-161275348	AGAAUAC no GUAUUCU kshv-miR-K12-4-3p(7mer-m8)	0.8451	0.8674	ENSG00000158887	ENST00000360451	3'UTR	0	0	13.1344	30	0	0	3.35426	12.8547					MPZ	myelin protein zero [Source:HGNC Symbol;Acc:7225]	protein_coding
chr1-:165631588-165631635	GUAGUGA no UCACUA hsa-miR-921(6mer) hsa-miR-3606(6mer) CACUAC hsa-miR-142-3p(6mer)	0.273	0.5976	ENSG00000143149	ENST00000354775	3'UTR	36.6931	32.5342	21.8907	29	0	1.51974	10.0628	12.8547					ALDH9A1	aldehyde dehydrogenase 9 family, member A1 [Source:HGNC Symbol;Acc:412]	protein_coding
chr1-:165631607-165631673	ACAUUCA vertebrate UGAAUGU hsa-miR-181a(7mer-m8) hsa-miR-181b(7mer-m8) hsa-miR-181c(7mer-m8) hsa-miR-181d(7mer-m8) hsa-miR-4262(7mer-m8)	0.412	0.6272	ENSG00000143149	ENST00000354775	3'UTR	0	0	15.3235	13	0	0	0	0		x			ALDH9A1	aldehyde dehydrogenase 9 family, member A1 [Source:HGNC Symbol;Acc:412]	protein_coding
chr1-:165631702-165631753	AGCUUAA no UAAGCU hsa-miR-21(6mer) hsa-miR-27b*(6mer-m8) hsa-miR-590-5p(6mer)	0.6215	0.8667	ENSG00000143149	ENST00000354775	3'UTR	0	0	4.37815	3	52.2443	50.1515	3.35426	0					ALDH9A1	aldehyde dehydrogenase 9 family, member A1 [Source:HGNC Symbol;Acc:412]	protein_coding
chr1-:165632105-165632161	GAGGAAG no UUCCUC hsa-miR-3125(6mer-m8) hsa-miR-3915(6mer-m8) hsa-miR-3916(6mer-m8) hsa-miR-3928(6mer)	0.8491	0.9748	ENSG00000143149	ENST00000354775	3'UTR	5.24187	4.06677	17.5126	18	1.58316	4.55922	3.35426	3.21367					ALDH9A1	aldehyde dehydrogenase 9 family, member A1 [Source:HGNC Symbol;Acc:412]	protein_coding
chr1-:165696945-165697009	AGGAUGC no GCAUCCU kshv-miR-K12-5(7mer-m8)	0.5501	0.9998	ENSG00000143183	ENST00000367881	3'UTR	0	0	0	0	25.3305	21.2764	3.35426	0			x		TMCO1	transmembrane and coiled-coil domains 1 [Source:HGNC Symbol;Acc:18188]	protein_coding
chr1-:165697198-165697268	GAAAGAA no UUCUUU hsa-miR-186(6mer) hsa-miR-3133(6mer)	0.469	0.5324	ENSG00000143183	ENST00000367881	CDS,3'UTR	10.4837	12.2003	2.18907	0	0	0	0	0					TMCO1	transmembrane and coiled-coil domains 1 [Source:HGNC Symbol;Acc:18188]	protein_coding
chr1-:165697349-165697358|165712403-165712467	UACAGGA weakly CCUGUA kshv-miR-K12-1(6mer-m8)	0.5262	0.7969	ENSG00000143183	ENST00000367881	CDS	0	0	15.3235	7	1.58316	3.03948	0	6.42735					TMCO1	transmembrane and coiled-coil domains 1 [Source:HGNC Symbol;Acc:18188]	protein_coding
chr1-:165737921-165737988	GUGCACA no	0.2684	1	ENSG00000143183	ENST00000367881	CDS	5.24187	8.13354	10.9454	8	0	3.03948	3.35426	3.21367					TMCO1	transmembrane and coiled-coil domains 1 [Source:HGNC Symbol;Acc:18188]	protein_coding
chr1-:166826357-166826413	CACAUUC no GAAUGUG kshv-miR-K12-3(7mer-m8)	0.1309	0.5401	ENSG00000152382	ENST00000367874	3'UTR	0	0	10.9454	20	0	0	0	3.21367					TADA1	transcriptional adaptor 1 [Source:HGNC Symbol;Acc:30631]	protein_coding
chr1-:166826907-166826955	AGUAUGU no ACAUAC hsa-miR-567(6mer) hsa-miR-297(6mer-m8)	0.0497	0.7898	ENSG00000152382	ENST00000367874	CDS	10.4837	16.2671	8.7563	3	15.8316	10.6382	0	0					TADA1	transcriptional adaptor 1 [Source:HGNC Symbol;Acc:30631]	protein_coding
chr1-:166891889-166891910	NA	0	0	ENSG00000143195	ENST00000271417	CDS	47.1769	20.3339	8.7563	1	4.74948	9.11845	46.9597	25.7094					ILDR2	immunoglobulin-like domain containing receptor 2 [Source:HGNC Symbol;Acc:18131]	protein_coding
chr1-:167510461-167510528	UUAGUGU weakly ACACUA hsa-miR-142-3p(6mer-m8) CACUAA ebv-miR-BART1-5p(6mer-m8)	0.0343	1	ENSG00000143162	ENST00000370509	3'UTR	15.7256	0	6.56722	10	23.7474	19.7566	0	0					CREG1	cellular repressor of E1A-stimulated genes 1 [Source:HGNC Symbol;Acc:2351]	protein_coding
chr1-:167510514-167510580	UUAAUGC vertebrate GCAUUAA hsa-miR-155(7mer-A1) kshv-miR-K12-11(7mer-A1)	0.3284	0.5578	ENSG00000143162	ENST00000370509	3'UTR	0	4.06677	35.0252	38	3.16632	0	6.70853	32.1367					CREG1	cellular repressor of E1A-stimulated genes 1 [Source:HGNC Symbol;Acc:2351]	protein_coding
chr1-:167511421-167511490	GAGAAAC no UUUCUC hsa-miR-539(6mer)	0.719	0.981	ENSG00000143162	ENST00000370509	3'UTR	0	0	2.18907	1	6.33264	7.59871	30.1884	35.3504					CREG1	cellular repressor of E1A-stimulated genes 1 [Source:HGNC Symbol;Acc:2351]	protein_coding
chr1-:167886961-167887007	ACCAGGC no GCCUGGU kshv-miR-K12-12*(7mer-m8) hsa-miR-1911*(7mer-m8)	0.7812	1	ENSG00000143158	ENST00000367846	3'UTR	0	4.06677	24.0798	16	1.58316	1.51974	10.0628	0					BRP44	brain protein 44 [Source:HGNC Symbol;Acc:24515]	protein_coding
chr1-:1683155-1683214	GUGCAAA vertebrate UUUGCAC hsa-miR-19a(7mer-m8) hsa-miR-19b(7mer-m8)	0.7116	0.9203	ENSG00000008130	ENST00000344463	3'UTR	5.24187	40.6677	4.37815	6	4.74948	0	3.35426	3.21367					NADK	NAD kinase [Source:HGNC Symbol;Acc:29831]	protein_coding
chr1-:16861770-16861821	UCCCUGA vertebrate UCAGGGA hsa-miR-125b(7mer-A1) hsa-miR-125a-5p(7mer-A1) hsa-miR-670(7mer-m8) hsa-miR-4319(7mer-A1)	0.0129	0.9989	ENSG00000233421	ENST00000415386	processed_transcript	199.191	162.671	98.5084	178	0	0	0	0					RP5-875O13.1		processed_transcript
chr1-:169439231-169439291	AGCAGCA vertebrate UGCUGCU hsa-miR-15a(7mer-m8) hsa-miR-16(7mer-m8) hsa-miR-15b(7mer-m8) hsa-miR-195(7mer-m8) hsa-miR-424(7mer-m8) hsa-miR-497(7mer-m8)	0.2279	0.9786	ENSG00000117479	ENST00000236137	CDS	15.7256	20.3339	13.1344	6	1.58316	0	0	0					SLC19A2	solute carrier family 19 (thiamine transporter), member 2 [Source:HGNC Symbol;Acc:10938]	protein_coding
chr1-:169446836-169446871	AGCAGCA vertebrate UGCUGCU hsa-miR-15a(7mer-m8) hsa-miR-16(7mer-m8) hsa-miR-15b(7mer-m8) hsa-miR-195(7mer-m8) hsa-miR-424(7mer-m8) hsa-miR-497(7mer-m8)	0.4841	1	ENSG00000117479	ENST00000236137	CDS	26.2094	4.06677	6.56722	4	0	0	0	0					SLC19A2	solute carrier family 19 (thiamine transporter), member 2 [Source:HGNC Symbol;Acc:10938]	protein_coding
chr1-:169446937-169446985	AGCACCA vertebrate UGGUGCU hsa-miR-29a(7mer-m8) hsa-miR-29b(7mer-m8) hsa-miR-29c(7mer-m8)	0.4323	0.9996	ENSG00000117479	ENST00000236137	CDS	10.4837	12.2003	4.37815	5	11.0821	16.7172	0	0					SLC19A2	solute carrier family 19 (thiamine transporter), member 2 [Source:HGNC Symbol;Acc:10938]	protein_coding
chr1-:169836109-169836114|169838068-169838127	AAGGUGC vertebrate GCACCUU hsa-miR-18a(7mer-m8) hsa-miR-18b(7mer-m8)	0.7244	0.6439	ENSG00000000457	ENST00000367772	CDS	10.4837	12.2003	4.37815	11	0	1.51974	0	0					SCYL3	SCY1-like 3 (S. cerevisiae) [Source:HGNC Symbol;Acc:19285]	protein_coding
chr1-:169953735-169953796	AGCAGCA vertebrate UGCUGCU hsa-miR-15a(7mer-m8) hsa-miR-16(7mer-m8) hsa-miR-15b(7mer-m8) hsa-miR-195(7mer-m8) hsa-miR-424(7mer-m8) hsa-miR-497(7mer-m8)	0.5425	0.9654	ENSG00000075945	ENST00000367765	CDS	0	20.3339	19.7017	20	52.2443	62.3094	26.8341	22.4957					KIFAP3	kinesin-associated protein 3 [Source:HGNC Symbol;Acc:17060]	protein_coding
chr1-:171670516-171670568	UAGUGUA weakly UACACUA hsa-miR-4280(7mer-A1)	0.7579	0.8199	ENSG00000117533	ENST00000236192	3'UTR	0	4.06677	63.4832	35	0	0	0	0					VAMP4	vesicle-associated membrane protein 4 [Source:HGNC Symbol;Acc:12645]	protein_coding
chr1-:171670659-171670735	AAAGAUG no	0.4169	0.7303	ENSG00000117533	ENST00000236192	3'UTR	0	0	6.56722	13	26.9137	39.5133	36.8969	12.8547					VAMP4	vesicle-associated membrane protein 4 [Source:HGNC Symbol;Acc:12645]	protein_coding
chr1-:1716738-1716800	ACAGUAC vertebrate GUACUGU hsa-miR-101(7mer-m8)	0.968	1	ENSG00000078369	ENST00000378609	3'UTR	15.7256	12.2003	17.5126	8	126.653	129.178	43.6054	25.7094					GNB1	guanine nucleotide binding protein (G protein), beta polypeptide 1 [Source:HGNC Symbol;Acc:4396]	protein_coding
chr1-:1717322-1717373	AGCAGCA vertebrate UGCUGCU hsa-miR-15a(7mer-m8) hsa-miR-16(7mer-m8) hsa-miR-15b(7mer-m8) hsa-miR-195(7mer-m8) hsa-miR-424(7mer-m8) hsa-miR-497(7mer-m8)	0.9121	1	ENSG00000078369	ENST00000378609	3'UTR	62.9025	61.0016	48.1596	34	14.2484	19.7566	0	0					GNB1	guanine nucleotide binding protein (G protein), beta polypeptide 1 [Source:HGNC Symbol;Acc:4396]	protein_coding
chr1-:1717611-1717669	UAGUGUU weakly AACACUA kshv-miR-K12-10a(7mer-A1) hsa-miR-4255(7mer-A1)	0.0072	0.6011	ENSG00000078369	ENST00000378609	3'UTR	31.4512	20.3339	41.5924	32	3.16632	4.55922	13.4171	12.8547					GNB1	guanine nucleotide binding protein (G protein), beta polypeptide 1 [Source:HGNC Symbol;Acc:4396]	protein_coding
chr1-:1717659-1717730	AAAGUGA weakly UCACUUU hsa-miR-3609(7mer-m8)	0.0153	0.9885	ENSG00000078369	ENST00000378609	3'UTR	36.6931	44.7345	72.2395	62	0	0	0	0					GNB1	guanine nucleotide binding protein (G protein), beta polypeptide 1 [Source:HGNC Symbol;Acc:4396]	protein_coding
chr1-:1717660-1717703	CCUCCAA no UUGGAG hsa-miR-515-5p(6mer-m8) hsa-miR-519e*(6mer-m8)	0.0052	0.5449	ENSG00000078369	ENST00000378609	3'UTR	0	4.06677	8.7563	4	0	0	0	0					GNB1	guanine nucleotide binding protein (G protein), beta polypeptide 1 [Source:HGNC Symbol;Acc:4396]	protein_coding
chr1-:1717717-1717776	AGGAUGG weakly CCAUCC hsa-miR-432*(6mer-m8) hsa-miR-1193(6mer) CAUCCU kshv-miR-K12-5(6mer) hsa-miR-1265(6mer) hsa-miR-3605-5p(6mer-m8)	0.0658	0.7126	ENSG00000078369	ENST00000378609	3'UTR	110.079	134.203	148.857	137	0	0	0	0					GNB1	guanine nucleotide binding protein (G protein), beta polypeptide 1 [Source:HGNC Symbol;Acc:4396]	protein_coding
chr1-:1717735-1717779	GGAGGAA no UUCCUC hsa-miR-3125(6mer-m8) hsa-miR-3915(6mer-m8) hsa-miR-3916(6mer-m8) hsa-miR-3928(6mer) UCCUCC hsa-miR-765(6mer)	0.5133	0.7711	ENSG00000078369	ENST00000378609	3'UTR	0	8.13354	8.7563	1	0	0	0	0					GNB1	guanine nucleotide binding protein (G protein), beta polypeptide 1 [Source:HGNC Symbol;Acc:4396]	protein_coding
chr1-:1718260-1718311	UUUACAG no CUGUAAA kshv-miR-K12-1(7mer-A1)	0.0809	0.9996	ENSG00000078369	ENST00000378609	3'UTR	0	4.06677	0	4	88.6569	107.902	23.4799	38.5641			x		GNB1	guanine nucleotide binding protein (G protein), beta polypeptide 1 [Source:HGNC Symbol;Acc:4396]	protein_coding
chr1-:1720590-1720651	UGAUGUU no	0.7875	0.8679	ENSG00000078369	ENST00000378609	CDS	0	0	2.18907	0	189.979	196.047	93.9194	112.479					GNB1	guanine nucleotide binding protein (G protein), beta polypeptide 1 [Source:HGNC Symbol;Acc:4396]	protein_coding
chr1-:1720689-1720708|1721833-1721861	AGAAGCA no	0.9168	1	ENSG00000078369	ENST00000378609	CDS	0	4.06677	0	1	12.6653	12.1579	6.70853	3.21367					GNB1	guanine nucleotide binding protein (G protein), beta polypeptide 1 [Source:HGNC Symbol;Acc:4396]	protein_coding
chr1-:172411266-172411306	AGAUGGC no	0.3215	0.9162	ENSG00000135845	ENST00000367728	CDS	0	0	0	5	4.74948	10.6382	36.8969	28.9231					PIGC	phosphatidylinositol glycan anchor biosynthesis, class C [Source:HGNC Symbol;Acc:8960]	protein_coding
chr1-:17349115-17349194	UGAUGGU no ACCAUCA kshv-miR-K12-6-3p(7mer-A1)	0.0335	0.6735	ENSG00000117118	ENST00000375499	CDS	0	8.13354	8.7563	10	7.9158	9.11845	33.5426	35.3504					SDHB	succinate dehydrogenase complex, subunit B, iron sulfur (Ip) [Source:HGNC Symbol;Acc:10681]	protein_coding
chr1-:17354303-17354352	GUACUGU no CAGUAC hsa-miR-1278(6mer-m8)	0.0219	0.4263	ENSG00000117118	ENST00000375499	CDS	5.24187	8.13354	6.56722	3	7.9158	15.1974	16.7713	25.7094					SDHB	succinate dehydrogenase complex, subunit B, iron sulfur (Ip) [Source:HGNC Symbol;Acc:10681]	protein_coding
chr1-:17355180-17355231|17359554-17359562	AUUGCAC vertebrate GUGCAAU hsa-miR-25(7mer-m8) hsa-miR-32(7mer-m8) hsa-miR-92a(7mer-m8) hsa-miR-363(7mer-m8) hsa-miR-367(7mer-m8) hsa-miR-92b(7mer-m8)	0.2875	0.8613	ENSG00000117118	ENST00000375499	CDS	73.3862	48.8013	24.0798	19	3.16632	1.51974	0	0					SDHB	succinate dehydrogenase complex, subunit B, iron sulfur (Ip) [Source:HGNC Symbol;Acc:10681]	protein_coding
chr1-:173772269-173772326	AGAAAUG no CAUUUC hsa-miR-203(6mer-m8) AUUUCU hsa-miR-539(6mer-m8)	0.0002	1	ENSG00000120334	ENST00000356198	CDS	5.24187	4.06677	0	0	47.4948	42.5528	0	0					CENPL	centromere protein L [Source:HGNC Symbol;Acc:17879]	protein_coding
chr1-:173780382-173780433	AGGAUGC no GCAUCCU kshv-miR-K12-5(7mer-m8)	0.9974	1	ENSG00000120334	ENST00000356198	CDS	5.24187	0	0	5	53.8274	39.5133	46.9597	51.4188					CENPL	centromere protein L [Source:HGNC Symbol;Acc:17879]	protein_coding
chr1-:173904164-173904228	UGAGUAG no	0.8624	0.9854	ENSG00000135870	ENST00000258349	3'UTR	0	4.06677	4.37815	2	15.8316	15.1974	30.1884	41.7777					RC3H1	ring finger and CCCH-type zinc finger domains 1 [Source:HGNC Symbol;Acc:29434]	protein_coding
chr1-:173934252-173934258|173939642-173939710	GUGCAAA vertebrate UUUGCAC hsa-miR-19a(7mer-m8) hsa-miR-19b(7mer-m8)	0.3001	0.8186	ENSG00000135870	ENST00000258349	CDS	47.1769	56.9348	15.3235	9	0	0	0	0					RC3H1	ring finger and CCCH-type zinc finger domains 1 [Source:HGNC Symbol;Acc:29434]	protein_coding
chr1-:173947701-173947758	GUGCAAA vertebrate UUUGCAC hsa-miR-19a(7mer-m8) hsa-miR-19b(7mer-m8)	0.8517	0.9157	ENSG00000135870	ENST00000258349	CDS	31.4512	61.0016	8.7563	9	0	0	0	0					RC3H1	ring finger and CCCH-type zinc finger domains 1 [Source:HGNC Symbol;Acc:29434]	protein_coding
chr1-:173962046-173962116	GUGCAAA vertebrate UUUGCAC hsa-miR-19a(7mer-m8) hsa-miR-19b(7mer-m8)	0.6673	0.855	ENSG00000135870	ENST00000258349	CDS	47.1769	48.8013	52.5378	35	0	1.51974	0	0					RC3H1	ring finger and CCCH-type zinc finger domains 1 [Source:HGNC Symbol;Acc:29434]	protein_coding
chr1-:175128087-175128136	UAAUGCA no GCAUUA hsa-miR-155(6mer) kshv-miR-K12-11(6mer)	0.1261	0.8604	ENSG00000235750	ENST00000423313	processed_transcript	0	0	0	0	6.33264	6.07896	10.0628	16.0684					KIAA0040	KIAA0040 [Source:HGNC Symbol;Acc:28950]	processed_transcript
chr1-:175129040-175129079	AAUGAGG no	0.0358	1	ENSG00000235750	ENST00000423313	processed_transcript	0	0	15.3235	13	3.16632	1.51974	0	0					KIAA0040	KIAA0040 [Source:HGNC Symbol;Acc:28950]	processed_transcript
chr1-:175129244-175129288	GUAGAGU no	0.1871	0.5803	ENSG00000235750	ENST00000423313	processed_transcript	0	0	8.7563	4	7.9158	15.1974	36.8969	44.9914					KIAA0040	KIAA0040 [Source:HGNC Symbol;Acc:28950]	processed_transcript
chr1-:175129590-175129661	UGCAGUA no ACUGCA hsa-miR-17*(6mer-m8) hsa-miR-143*(6mer-m8)	0.2871	0.6915	ENSG00000235750	ENST00000423313	processed_transcript	20.9675	93.5358	10.9454	9	0	0	0	0					KIAA0040	KIAA0040 [Source:HGNC Symbol;Acc:28950]	processed_transcript
chr1-:175914034-175914082	AGCAGCA vertebrate UGCUGCU hsa-miR-15a(7mer-m8) hsa-miR-16(7mer-m8) hsa-miR-15b(7mer-m8) hsa-miR-195(7mer-m8) hsa-miR-424(7mer-m8) hsa-miR-497(7mer-m8)	0.98	0.9741	ENSG00000143207	ENST00000367669	3'UTR	20.9675	4.06677	19.7017	20	0	0	0	0					RFWD2	ring finger and WD repeat domain 2 [Source:HGNC Symbol;Acc:17440]	protein_coding
chr1-:175937567-175937597	NA	0	0	ENSG00000252906	ENST00000517097	snoRNA	31.4512	40.6677	24.0798	32	0	0	0	0					SCARNA3	Small Cajal body specific RNA 3 [Source:RFAM;Acc:RF00565]	snoRNA
chr1-:175958543-175958615|175996707-175996722	UUAGUGU weakly ACACUA hsa-miR-142-3p(6mer-m8) CACUAA ebv-miR-BART1-5p(6mer-m8)	0.14	0.578	ENSG00000143207	ENST00000367669	CDS	26.2094	52.868	41.5924	38	28.4969	31.9146	26.8341	16.0684					RFWD2	ring finger and WD repeat domain 2 [Source:HGNC Symbol;Acc:17440]	protein_coding
chr1-:179068667-179068695	UACCUGA no UCAGGUA ebv-miR-BART4(7mer-A1)	0.293	1	ENSG00000143322	ENST00000502732	3'UTR	0	0	2.18907	0	39.579	37.9935	0	0					ABL2	v-abl Abelson murine leukemia viral oncogene homolog 2 [Source:HGNC Symbol;Acc:77]	protein_coding
chr1-:179068918-179068967	AGCGAGC no	0.0481	0.989	ENSG00000143322	ENST00000502732	3'UTR	15.7256	16.2671	24.0798	19	0	0	0	0					ABL2	v-abl Abelson murine leukemia viral oncogene homolog 2 [Source:HGNC Symbol;Acc:77]	protein_coding
chr1-:179070823-179070888	AGAAUAC no GUAUUCU kshv-miR-K12-4-3p(7mer-m8)	0.0911	0.8917	ENSG00000143322	ENST00000502732	3'UTR	0	0	28.458	29	0	0	0	0				x	ABL2	v-abl Abelson murine leukemia viral oncogene homolog 2 [Source:HGNC Symbol;Acc:77]	protein_coding
chr1-:179072183-179072226	AUAGUGG no	0.8514	0.7266	ENSG00000143322	ENST00000502732	3'UTR	0	8.13354	21.8907	36	7.9158	10.6382	16.7713	3.21367					ABL2	v-abl Abelson murine leukemia viral oncogene homolog 2 [Source:HGNC Symbol;Acc:77]	protein_coding
chr1-:179073096-179073149	AGAAUAC no GUAUUCU kshv-miR-K12-4-3p(7mer-m8)	0.9013	0.9501	ENSG00000143322	ENST00000502732	3'UTR	0	0	109.454	90	33.2463	37.9935	46.9597	35.3504					ABL2	v-abl Abelson murine leukemia viral oncogene homolog 2 [Source:HGNC Symbol;Acc:77]	protein_coding
chr1-:179074504-179074573	AGCAGCA vertebrate UGCUGCU hsa-miR-15a(7mer-m8) hsa-miR-16(7mer-m8) hsa-miR-15b(7mer-m8) hsa-miR-195(7mer-m8) hsa-miR-424(7mer-m8) hsa-miR-497(7mer-m8)	0.8957	0.9872	ENSG00000143322	ENST00000502732	3'UTR	5.24187	8.13354	24.0798	8	55.4106	59.2699	0	6.42735					ABL2	v-abl Abelson murine leukemia viral oncogene homolog 2 [Source:HGNC Symbol;Acc:77]	protein_coding
chr1-:179074802-179074865	AGCAGCA vertebrate UGCUGCU hsa-miR-15a(7mer-m8) hsa-miR-16(7mer-m8) hsa-miR-15b(7mer-m8) hsa-miR-195(7mer-m8) hsa-miR-424(7mer-m8) hsa-miR-497(7mer-m8)	0.8492	1	ENSG00000143322	ENST00000502732	3'UTR	10.4837	32.5342	52.5378	38	58.5769	39.5133	16.7713	16.0684					ABL2	v-abl Abelson murine leukemia viral oncogene homolog 2 [Source:HGNC Symbol;Acc:77]	protein_coding
chr1-:179076322-179076361	AGCAGCA vertebrate UGCUGCU hsa-miR-15a(7mer-m8) hsa-miR-16(7mer-m8) hsa-miR-15b(7mer-m8) hsa-miR-195(7mer-m8) hsa-miR-424(7mer-m8) hsa-miR-497(7mer-m8)	0.0106	0.8392	ENSG00000143322	ENST00000502732	3'UTR	0	4.06677	19.7017	14	0	0	0	0		x			ABL2	v-abl Abelson murine leukemia viral oncogene homolog 2 [Source:HGNC Symbol;Acc:77]	protein_coding
chr1-:179090885-179090936	GUAGUGU vertebrate ACACUAC hsa-miR-142-3p(7mer-m8)	0.807	0.9285	ENSG00000143322	ENST00000502732	CDS	31.4512	24.4006	30.647	7	42.7453	53.1909	3.35426	19.282					ABL2	v-abl Abelson murine leukemia viral oncogene homolog 2 [Source:HGNC Symbol;Acc:77]	protein_coding
chr1-:179100474-179100539	AAAGUGC vertebrate GCACUUU hsa-miR-17(7mer-m8) hsa-miR-20a(7mer-m8) hsa-miR-93(7mer-m8) hsa-miR-106a(7mer-m8) hsa-miR-106b(7mer-m8) hsa-miR-20b(7mer-m8) hsa-miR-526b*(7mer-m8) hsa-miR-519d(7mer-m8)	0.9378	0.7076	ENSG00000143322	ENST00000502732	CDS	340.722	317.208	194.828	196	9.49896	10.6382	3.35426	6.42735					ABL2	v-abl Abelson murine leukemia viral oncogene homolog 2 [Source:HGNC Symbol;Acc:77]	protein_coding
chr1-:179100563-179100616|179102446-179102454	UUUAGUG weakly CACUAA ebv-miR-BART1-5p(6mer-m8)	0.0001	0.9999	ENSG00000143322	ENST00000502732	CDS	0	0	19.7017	3	0	0	0	0					ABL2	v-abl Abelson murine leukemia viral oncogene homolog 2 [Source:HGNC Symbol;Acc:77]	protein_coding
chr1-:179810317-179810386	UAGUGUU weakly AACACUA kshv-miR-K12-10a(7mer-A1) hsa-miR-4255(7mer-A1)	0.2582	0.9383	ENSG00000169905	ENST00000367612	3'UTR	52.4187	81.3354	205.773	162	26.9137	45.5922	26.8341	19.282					TOR1AIP2	torsin A interacting protein 2 [Source:HGNC Symbol;Acc:24055]	protein_coding
chr1-:179810525-179810571	ACAAAGA no CUUUGU hsa-miR-524-5p(6mer-m8) hsa-miR-520d-5p(6mer-m8) ebv-miR-BART22(6mer-m8)	0.5547	0.8076	ENSG00000169905	ENST00000367612	3'UTR	0	0	0	0	42.7453	39.5133	0	0					TOR1AIP2	torsin A interacting protein 2 [Source:HGNC Symbol;Acc:24055]	protein_coding
chr1-:179812782-179812845	AUAGUGU no ACACUA hsa-miR-142-3p(6mer-m8)	0.6441	0.7663	ENSG00000169905	ENST00000367612	3'UTR	5.24187	8.13354	0	9	0	0	0	0					TOR1AIP2	torsin A interacting protein 2 [Source:HGNC Symbol;Acc:24055]	protein_coding
chr1-:179815430-179815478	GGCAGCA no UGCUGC hsa-miR-15a(6mer-m8) hsa-miR-16(6mer-m8) hsa-miR-103(6mer) hsa-miR-107(6mer) hsa-miR-15b(6mer-m8) hsa-miR-195(6mer-m8) hsa-miR-424(6mer-m8) hsa-miR-497(6mer-m8) GCUGCC hsa-miR-885-3p(6mer)	0.867	1	ENSG00000169905	ENST00000367612	CDS	10.4837	4.06677	15.3235	11	0	0	0	0					TOR1AIP2	torsin A interacting protein 2 [Source:HGNC Symbol;Acc:24055]	protein_coding
chr1-:179832606-179832633	ACAAGAA no	0.0035	1	ENSG00000169905	ENST00000482587	protein_coding	0	0	0	2	145.651	151.974	0	0					TOR1AIP2	torsin A interacting protein 2 [Source:HGNC Symbol;Acc:24055]	protein_coding
chr1-:179832910-179832955	UUAAGUG no	0.692	1	ENSG00000169905	ENST00000482587	protein_coding	5.24187	0	2.18907	6	45.9116	42.5528	60.3768	64.2735					TOR1AIP2	torsin A interacting protein 2 [Source:HGNC Symbol;Acc:24055]	protein_coding
chr1-:179833343-179833403	UGAAUAA no	0.3284	0.8063	ENSG00000169905	ENST00000482587	protein_coding	0	0	15.3235	17	22.1642	15.1974	43.6054	25.7094					TOR1AIP2	torsin A interacting protein 2 [Source:HGNC Symbol;Acc:24055]	protein_coding
chr1-:179833749-179833800	UGAAUAA no	0.8747	0.9858	ENSG00000169905	ENST00000482587	protein_coding	0	0	13.1344	20	9.49896	6.07896	30.1884	77.1281					TOR1AIP2	torsin A interacting protein 2 [Source:HGNC Symbol;Acc:24055]	protein_coding
chr1-:179833930-179833972	UUUGUUU no AAACAAA ebv-miR-BART19-3p(7mer-m8)	0.9949	0.7699	ENSG00000169905	ENST00000482587	protein_coding	0	0	0	0	79.158	65.3489	0	0					TOR1AIP2	torsin A interacting protein 2 [Source:HGNC Symbol;Acc:24055]	protein_coding
chr1-:179833963-179834015	UAAUGCA no GCAUUA hsa-miR-155(6mer) kshv-miR-K12-11(6mer)	0.0903	0.6766	ENSG00000169905	ENST00000482587	protein_coding	0	0	2.18907	1	3.16632	7.59871	26.8341	22.4957					TOR1AIP2	torsin A interacting protein 2 [Source:HGNC Symbol;Acc:24055]	protein_coding
chr1-:179834253-179834326	ACAAUCA no	0.0213	1	ENSG00000169905	ENST00000482587	protein_coding	0	0	15.3235	10	1.58316	0	0	0					TOR1AIP2	torsin A interacting protein 2 [Source:HGNC Symbol;Acc:24055]	protein_coding
chr1-:179834929-179834989|179846373-179846381	UGAUGCU no GCAUCA hsa-miR-1322(6mer-m8)	0.7377	1	ENSG00000169905	ENST00000482587	protein_coding	0	0	24.0798	14	120.32	103.342	335.426	359.931					TOR1AIP2	torsin A interacting protein 2 [Source:HGNC Symbol;Acc:24055]	protein_coding
chr1-:180943741-180943793	UUUGCUU no	0.3087	0.9689	ENSG00000135823	ENST00000258301	3'UTR	0	0	0	0	36.4127	53.1909	0	0					STX6	syntaxin 6 [Source:HGNC Symbol;Acc:11441]	protein_coding
chr1-:180944315-180944380	GUGCAAA vertebrate UUUGCAC hsa-miR-19a(7mer-m8) hsa-miR-19b(7mer-m8)	0.6911	0.8847	ENSG00000135823	ENST00000258301	3'UTR	15.7256	8.13354	24.0798	14	22.1642	13.6777	0	0					STX6	syntaxin 6 [Source:HGNC Symbol;Acc:11441]	protein_coding
chr1-:180944475-180944523	UUAGUGU weakly ACACUA hsa-miR-142-3p(6mer-m8) CACUAA ebv-miR-BART1-5p(6mer-m8)	0.158	1	ENSG00000135823	ENST00000258301	3'UTR	0	12.2003	15.3235	16	36.4127	28.8751	3.35426	3.21367					STX6	syntaxin 6 [Source:HGNC Symbol;Acc:11441]	protein_coding
chr1-:180944845-180944903	CACCCUC no AGGGUG hsa-miR-3620(6mer)	0.4332	1	ENSG00000135823	ENST00000258301	3'UTR	0	0	15.3235	18	0	0	0	0					STX6	syntaxin 6 [Source:HGNC Symbol;Acc:11441]	protein_coding
chr1-:180945574-180945644	UGCAGCA vertebrate UGCUGCA hsa-miR-103(7mer-A1) hsa-miR-107(7mer-A1)	0.0297	0.848	ENSG00000135823	ENST00000258301	3'UTR	0	0	19.7017	15	6.33264	15.1974	0	12.8547					STX6	syntaxin 6 [Source:HGNC Symbol;Acc:11441]	protein_coding
chr1-:182360844-182360879	AGGAGAG no CUCUCC hsa-miR-185(6mer) hsa-miR-4306(6mer) UCUCCU hsa-miR-3150b(6mer-m8)	0.0025	0.9614	ENSG00000135821	ENST00000331872	5'UTR	0	0	43.7815	42	0	0	0	0					GLUL	glutamate-ammonia ligase [Source:HGNC Symbol;Acc:4341]	protein_coding
chr1-:182544309-182544385	UGGGUAU no AUACCCA kshv-miR-K12-9(7mer-m8)	0.7313	0.7559	ENSG00000135828	ENST00000367559	3'UTR	0	0	35.0252	45	4.74948	0	0	0					RNASEL	ribonuclease L (2',5'-oligoisoadenylate synthetase-dependent) [Source:HGNC Symbol;Acc:10050]	protein_coding
chr1-:182567881-182567963	ACAUUCA vertebrate UGAAUGU hsa-miR-181a(7mer-m8) hsa-miR-181b(7mer-m8) hsa-miR-181c(7mer-m8) hsa-miR-181d(7mer-m8) hsa-miR-4262(7mer-m8)	0.6458	0.7868	ENSG00000143333	ENST00000367558	3'UTR	5.24187	4.06677	52.5378	33	0	0	0	0					RGS16	regulator of G-protein signaling 16 [Source:HGNC Symbol;Acc:9997]	protein_coding
chr1-:183596614-183596671	ACCAGCA weakly UGCUGGU hsa-miR-634(7mer-m8)	0.7069	0.7061	ENSG00000162704	ENST00000462965	protein_coding	0	0	87.563	46	3.16632	4.55922	0	0					ARPC5	actin related protein 2/3 complex, subunit 5, 16kDa [Source:HGNC Symbol;Acc:708]	protein_coding
chr1-:183602219-183602286	GUGUUGA no UCAACA hsa-miR-653(6mer) hsa-miR-1267(6mer-m8) CAACAC kshv-miR-K12-10a(6mer-m8) kshv-miR-K12-10b(6mer-m8)	0.9174	0.3748	ENSG00000162704	ENST00000462965	protein_coding	0	4.06677	13.1344	7	1.58316	4.55922	80.5024	57.8461					ARPC5	actin related protein 2/3 complex, subunit 5, 16kDa [Source:HGNC Symbol;Acc:708]	protein_coding
chr1-:184659796-184659839	UAGUGUU weakly AACACUA kshv-miR-K12-10a(7mer-A1) hsa-miR-4255(7mer-A1)	0.2616	0.582	ENSG00000116406	ENST00000318130	3'UTR	10.4837	20.3339	54.7269	43	6.33264	6.07896	0	3.21367					EDEM3	ER degradation enhancer, mannosidase alpha-like 3 [Source:HGNC Symbol;Acc:16787]	protein_coding
chr1-:184659952-184659995	UUGUGCA no GCACAA hsa-miR-2113(6mer-m8)	0.1368	0.5391	ENSG00000116406	ENST00000318130	3'UTR	5.24187	8.13354	4.37815	3	0	0	0	0					EDEM3	ER degradation enhancer, mannosidase alpha-like 3 [Source:HGNC Symbol;Acc:16787]	protein_coding
chr1-:184660216-184660267	UAAUGCC vertebrate GGCAUUA hsa-miR-365(7mer-A1)	0.6406	0.9554	ENSG00000116406	ENST00000318130	3'UTR	0	0	19.7017	25	23.7474	13.6777	191.193	170.325					EDEM3	ER degradation enhancer, mannosidase alpha-like 3 [Source:HGNC Symbol;Acc:16787]	protein_coding
chr1-:184662265-184662322	GAUGGAG weakly UCCAUC hsa-miR-3134(6mer)	0.8847	0.8643	ENSG00000116406	ENST00000318130	3'UTR	0	0	32.8361	26	1.58316	13.6777	40.2512	41.7777					EDEM3	ER degradation enhancer, mannosidase alpha-like 3 [Source:HGNC Symbol;Acc:16787]	protein_coding
chr1-:184761886-184761947	AAAGUGA weakly UCACUUU hsa-miR-3609(7mer-m8)	0.1733	0.496	ENSG00000135842	ENST00000367511	3'UTR	0	0	4.37815	4	0	0	0	0					FAM129A	family with sequence similarity 129, member A [Source:HGNC Symbol;Acc:16784]	protein_coding
chr1-:184763636-184763714	AGAUGGU no ACCAUC kshv-miR-K12-6-3p(6mer) hsa-miR-1193(6mer-m8)	0.5541	0.9898	ENSG00000135842	ENST00000367511	3'UTR	0	0	30.647	47	0	0	20.1256	38.5641					FAM129A	family with sequence similarity 129, member A [Source:HGNC Symbol;Acc:16784]	protein_coding
chr1-:184763738-184763798	AAAGUGC vertebrate GCACUUU hsa-miR-17(7mer-m8) hsa-miR-20a(7mer-m8) hsa-miR-93(7mer-m8) hsa-miR-106a(7mer-m8) hsa-miR-106b(7mer-m8) hsa-miR-20b(7mer-m8) hsa-miR-526b*(7mer-m8) hsa-miR-519d(7mer-m8)	0.6183	0.6839	ENSG00000135842	ENST00000367511	3'UTR	15.7256	8.13354	194.828	212	15.8316	16.7172	60.3768	25.7094					FAM129A	family with sequence similarity 129, member A [Source:HGNC Symbol;Acc:16784]	protein_coding
chr1-:184763749-184763802	AAAGUGC vertebrate GCACUUU hsa-miR-17(7mer-m8) hsa-miR-20a(7mer-m8) hsa-miR-93(7mer-m8) hsa-miR-106a(7mer-m8) hsa-miR-106b(7mer-m8) hsa-miR-20b(7mer-m8) hsa-miR-526b*(7mer-m8) hsa-miR-519d(7mer-m8)	0.6344	0.6892	ENSG00000135842	ENST00000367511	3'UTR	0	0	8.7563	12	0	0	6.70853	16.0684					FAM129A	family with sequence similarity 129, member A [Source:HGNC Symbol;Acc:16784]	protein_coding
chr1-:184763825-184763903	CUCCCUC weakly GAGGGAG kshv-miR-K12-8*(7mer-m8)	0.4687	1	ENSG00000135842	ENST00000367511	3'UTR	0	0	48.1596	40	0	0	0	0					FAM129A	family with sequence similarity 129, member A [Source:HGNC Symbol;Acc:16784]	protein_coding
chr1-:185265981-185266054	AGCAGCA vertebrate UGCUGCU hsa-miR-15a(7mer-m8) hsa-miR-16(7mer-m8) hsa-miR-15b(7mer-m8) hsa-miR-195(7mer-m8) hsa-miR-424(7mer-m8) hsa-miR-497(7mer-m8)	0.9141	0.9903	ENSG00000116679	ENST00000367498	3'UTR	20.9675	24.4006	2.18907	10	36.4127	30.3948	20.1256	28.9231					IVNS1ABP	influenza virus NS1A binding protein [Source:HGNC Symbol;Acc:16951]	protein_coding
chr1-:185266718-185266790	AGAGUGU no ACACUC hsa-miR-122(6mer-m8) hsa-miR-574-5p(6mer) hsa-miR-3659(6mer) CACUCU hsa-miR-759(6mer-m8)	0.615	0.7695	ENSG00000116679	ENST00000367498	3'UTR	0	0	10.9454	10	3.16632	1.51974	3.35426	0					IVNS1ABP	influenza virus NS1A binding protein [Source:HGNC Symbol;Acc:16951]	protein_coding
chr1-:185266824-185266889	GUGCAAA vertebrate UUUGCAC hsa-miR-19a(7mer-m8) hsa-miR-19b(7mer-m8)	0.5225	0.8503	ENSG00000116679	ENST00000367498	3'UTR	47.1769	16.2671	15.3235	13	0	0	0	0					IVNS1ABP	influenza virus NS1A binding protein [Source:HGNC Symbol;Acc:16951]	protein_coding
chr1-:185270609-185270657	ACUGUAG weakly CUACAGU kshv-miR-K12-2(7mer-m8) hsa-miR-1183(7mer-m8)	0.9493	0.883	ENSG00000116679	ENST00000367498	CDS	0	0	4.37815	2	1.58316	0	20.1256	25.7094			x		IVNS1ABP	influenza virus NS1A binding protein [Source:HGNC Symbol;Acc:16951]	protein_coding
chr1-:185286187-185286237	GCGGUCA no GACCGC kshv-miR-K12-3*(6mer-m8)	0.4761	0.9342	ENSG00000116679	ENST00000367498	5'UTR	0	0	13.1344	9	0	4.55922	3.35426	3.21367					IVNS1ABP	influenza virus NS1A binding protein [Source:HGNC Symbol;Acc:16951]	protein_coding
chr1-:186287633-186287690	AAAGUGC vertebrate GCACUUU hsa-miR-17(7mer-m8) hsa-miR-20a(7mer-m8) hsa-miR-93(7mer-m8) hsa-miR-106a(7mer-m8) hsa-miR-106b(7mer-m8) hsa-miR-20b(7mer-m8) hsa-miR-526b*(7mer-m8) hsa-miR-519d(7mer-m8)	0.34	0.75	ENSG00000047410	ENST00000367478	CDS	10.4837	8.13354	6.56722	9	60.1601	60.7896	3.35426	6.42735					TPR	translocated promoter region (to activated MET oncogene) [Source:HGNC Symbol;Acc:12017]	protein_coding
chr1-:186287720-186287735|186287864-186287918	UGUAGUG vertebrate CACUACA hsa-miR-142-3p(7mer-A1)	0.97	0.9997	ENSG00000047410	ENST00000367478	CDS	20.9675	32.5342	126.966	89	449.617	442.245	348.844	363.145					TPR	translocated promoter region (to activated MET oncogene) [Source:HGNC Symbol;Acc:12017]	protein_coding
chr1-:186321112-186321154	UAGUUAG no	0.9728	0.6782	ENSG00000047410	ENST00000367478	CDS	5.24187	0	0	2	45.9116	42.5528	10.0628	0					TPR	translocated promoter region (to activated MET oncogene) [Source:HGNC Symbol;Acc:12017]	protein_coding
chr1-:186331452-186331496	AAGAUGU no ACAUCU hsa-miR-576-3p(6mer)	0.9817	0.9966	ENSG00000047410	ENST00000367478	CDS	0	0	0	4	9.49896	12.1579	20.1256	38.5641					TPR	translocated promoter region (to activated MET oncogene) [Source:HGNC Symbol;Acc:12017]	protein_coding
chr1-:19411158-19411192|19412638-19412663	GAGGUAA no UACCUC hsa-let-7a(6mer) hsa-let-7b(6mer) hsa-let-7c(6mer) hsa-let-7d(6mer) hsa-let-7e(6mer) hsa-let-7f(6mer) hsa-miR-98(6mer) hsa-let-7g(6mer) hsa-let-7i(6mer) hsa-miR-202(6mer)	0.7519	0.9433	ENSG00000127481	ENST00000375267	CDS	26.2094	24.4006	0	0	1.58316	0	0	0					UBR4	ubiquitin protein ligase E3 component n-recognin 4 [Source:HGNC Symbol;Acc:30313]	protein_coding
chr1-:19413179-19413243	UAGUGCA vertebrate UGCACUA hsa-miR-130a(7mer-A1) hsa-miR-301a(7mer-A1) hsa-miR-130b(7mer-A1) hsa-miR-454(7mer-A1) hsa-miR-301b(7mer-A1) hsa-miR-4295(7mer-A1) hsa-miR-3666(7mer-A1)	0.0918	0.9271	ENSG00000127481	ENST00000375267	CDS	15.7256	20.3339	28.458	25	0	1.51974	0	0					UBR4	ubiquitin protein ligase E3 component n-recognin 4 [Source:HGNC Symbol;Acc:30313]	protein_coding
chr1-:19488325-19488390	AAAGUGC vertebrate GCACUUU hsa-miR-17(7mer-m8) hsa-miR-20a(7mer-m8) hsa-miR-93(7mer-m8) hsa-miR-106a(7mer-m8) hsa-miR-106b(7mer-m8) hsa-miR-20b(7mer-m8) hsa-miR-526b*(7mer-m8) hsa-miR-519d(7mer-m8)	0.0473	0.5685	ENSG00000127481	ENST00000375267	CDS	5.24187	12.2003	6.56722	8	22.1642	22.7961	3.35426	3.21367					UBR4	ubiquitin protein ligase E3 component n-recognin 4 [Source:HGNC Symbol;Acc:30313]	protein_coding
chr1-:19528223-19528281	AAGUGCA weakly UGCACUU hsa-miR-519c-3p(7mer-m8) hsa-miR-519b-3p(7mer-m8) hsa-miR-519a(7mer-m8)	0.9406	0.7803	ENSG00000127481	ENST00000375267	CDS	0	0	2.18907	3	0	0	0	0					UBR4	ubiquitin protein ligase E3 component n-recognin 4 [Source:HGNC Symbol;Acc:30313]	protein_coding
chr1-:19545493-19545534	ACAUUCA vertebrate UGAAUGU hsa-miR-181a(7mer-m8) hsa-miR-181b(7mer-m8) hsa-miR-181c(7mer-m8) hsa-miR-181d(7mer-m8) hsa-miR-4262(7mer-m8)	0.9311	0.9986	ENSG00000127463	ENST00000477853	3'UTR	5.24187	0	39.4033	18	0	0	0	0					KIAA0090	KIAA0090 [Source:HGNC Symbol;Acc:28957]	protein_coding
chr1-:197059353-197059418	AAGUGCA weakly UGCACUU hsa-miR-519c-3p(7mer-m8) hsa-miR-519b-3p(7mer-m8) hsa-miR-519a(7mer-m8)	0.1682	0.688	ENSG00000066279	ENST00000367409	CDS	47.1769	89.469	15.3235	21	9.49896	12.1579	13.4171	3.21367					ASPM	asp (abnormal spindle) homolog, microcephaly associated (Drosophila) [Source:HGNC Symbol;Acc:19048]	protein_coding
chr1-:197062201-197062243	ACUGUAG weakly CUACAGU kshv-miR-K12-2(7mer-m8) hsa-miR-1183(7mer-m8)	0.8842	0.9217	ENSG00000066279	ENST00000367409	CDS	0	0	10.9454	9	53.8274	48.6317	26.8341	32.1367					ASPM	asp (abnormal spindle) homolog, microcephaly associated (Drosophila) [Source:HGNC Symbol;Acc:19048]	protein_coding
chr1-:197474759-197474822	UCAAGUA vertebrate UACUUGA hsa-miR-26a(7mer-m8) hsa-miR-26b(7mer-m8) hsa-miR-1297(7mer-m8)	0.8268	0.9324	ENSG00000213047	ENST00000416626	3'UTR	5.24187	12.2003	17.5126	18	18.9979	9.11845	0	0					DENND1B	DENN/MADD domain containing 1B [Source:HGNC Symbol;Acc:28404]	protein_coding
chr1-:197474852-197474894	UUGGCAA vertebrate UUGCCAA hsa-miR-182(7mer-m8)	0.9591	0.8645	ENSG00000213047	ENST00000416626	3'UTR	0	24.4006	50.3487	58	28.4969	24.3159	0	0					DENND1B	DENN/MADD domain containing 1B [Source:HGNC Symbol;Acc:28404]	protein_coding
chr1-:197475312-197475343	AUUGCAC vertebrate GUGCAAU hsa-miR-25(7mer-m8) hsa-miR-32(7mer-m8) hsa-miR-92a(7mer-m8) hsa-miR-363(7mer-m8) hsa-miR-367(7mer-m8) hsa-miR-92b(7mer-m8)	0.1674	0.9485	ENSG00000213047	ENST00000416626	3'UTR	0	0	2.18907	11	6.33264	6.07896	10.0628	0					DENND1B	DENN/MADD domain containing 1B [Source:HGNC Symbol;Acc:28404]	protein_coding
chr1-:197476071-197476132	AGCAGCA vertebrate UGCUGCU hsa-miR-15a(7mer-m8) hsa-miR-16(7mer-m8) hsa-miR-15b(7mer-m8) hsa-miR-195(7mer-m8) hsa-miR-424(7mer-m8) hsa-miR-497(7mer-m8)	0.0367	0.6814	ENSG00000213047	ENST00000416626	3'UTR	0	0	21.8907	21	0	0	0	0		x			DENND1B	DENN/MADD domain containing 1B [Source:HGNC Symbol;Acc:28404]	protein_coding
chr1-:197479291-197479325	UAGCUUA vertebrate UAAGCUA hsa-miR-21(7mer-A1) hsa-miR-590-5p(7mer-A1)	0.4092	0.7242	ENSG00000213047	ENST00000416626	3'UTR	0	0	4.37815	1	101.322	88.145	13.4171	22.4957					DENND1B	DENN/MADD domain containing 1B [Source:HGNC Symbol;Acc:28404]	protein_coding
chr1-:197586829-197586889|197611840-197611847	AGCAGCU weakly AGCUGCU hsa-miR-646(7mer-m8)	0.6664	0.8794	ENSG00000213047	ENST00000416626	CDS	0	8.13354	10.9454	7	0	1.51974	0	0					DENND1B	DENN/MADD domain containing 1B [Source:HGNC Symbol;Acc:28404]	protein_coding
chr1-:197586853-197586889|197611840-197611873	AAAGUGC vertebrate GCACUUU hsa-miR-17(7mer-m8) hsa-miR-20a(7mer-m8) hsa-miR-93(7mer-m8) hsa-miR-106a(7mer-m8) hsa-miR-106b(7mer-m8) hsa-miR-20b(7mer-m8) hsa-miR-526b*(7mer-m8) hsa-miR-519d(7mer-m8)	0.6373	0.7907	ENSG00000213047	ENST00000416626	CDS	10.4837	24.4006	30.647	35	11.0821	7.59871	6.70853	3.21367					DENND1B	DENN/MADD domain containing 1B [Source:HGNC Symbol;Acc:28404]	protein_coding
chr1-:200375895-200375938	GCUAAAC no GUUUAGC kshv-miR-K12-4-5p(7mer-m8)	0.3296	1	ENSG00000162702	ENST00000294740	3'UTR	0	0	32.8361	46	37.9958	33.4343	154.296	160.684					ZNF281	zinc finger protein 281 [Source:HGNC Symbol;Acc:13075]	protein_coding
chr1-:200375986-200376071	UUGCAUU vertebrate AAUGCAA hsa-miR-33a(7mer-A1) hsa-miR-33b(7mer-A1)	0.7073	0.9255	ENSG00000162702	ENST00000294740	3'UTR	0	8.13354	8.7563	8	147.234	156.533	107.336	122.12					ZNF281	zinc finger protein 281 [Source:HGNC Symbol;Acc:13075]	protein_coding
chr1-:200376038-200376101	UUAAUAG weakly CUAUUAA hsa-miR-633(7mer-A1)	0.7579	1	ENSG00000162702	ENST00000294740	3'UTR	0	0	15.3235	20	31.6632	25.8356	67.0853	61.0598					ZNF281	zinc finger protein 281 [Source:HGNC Symbol;Acc:13075]	protein_coding
chr1-:200376060-200376120	AACAUUC mammals GAAUGUU hsa-miR-543(7mer-m8)	0.8085	0.9994	ENSG00000162702	ENST00000294740	3'UTR	0	12.2003	35.0252	56	9.49896	18.2369	50.314	51.4188					ZNF281	zinc finger protein 281 [Source:HGNC Symbol;Acc:13075]	protein_coding
chr1-:200376254-200376326	UUAGAGU no CUCUAA hsa-miR-1303(6mer)	0.9574	0.9042	ENSG00000162702	ENST00000294740	CDS	15.7256	8.13354	21.8907	25	166.232	147.415	107.336	93.1965					ZNF281	zinc finger protein 281 [Source:HGNC Symbol;Acc:13075]	protein_coding
chr1-:200376532-200376573	UGUCAAC mammals GUUGACA hsa-miR-505(7mer-A1)	0.4586	1	ENSG00000162702	ENST00000294740	CDS	0	0	2.18907	1	53.8274	51.6712	0	0					ZNF281	zinc finger protein 281 [Source:HGNC Symbol;Acc:13075]	protein_coding
chr1-:200376663-200376725	GUAGUGU vertebrate ACACUAC hsa-miR-142-3p(7mer-m8)	0.3397	0.7818	ENSG00000162702	ENST00000294740	CDS	791.523	715.752	595.428	1277	61.7432	51.6712	191.193	163.897					ZNF281	zinc finger protein 281 [Source:HGNC Symbol;Acc:13075]	protein_coding
chr1-:200378021-200378066	AUCACAG no CUGUGA hsa-miR-27a(6mer) hsa-miR-27b(6mer) kshv-miR-K12-11*(6mer-m8) hsa-miR-513a-5p(6mer)	0.9899	0.9999	ENSG00000162702	ENST00000294740	CDS	10.4837	0	0	0	49.0779	42.5528	0	0					ZNF281	zinc finger protein 281 [Source:HGNC Symbol;Acc:13075]	protein_coding
chr1-:200638777-200638800	NA	0	0	ENSG00000118197	ENST00000436897	5'UTR	15.7256	12.2003	10.9454	3	0	1.51974	0	0					DDX59	DEAD (Asp-Glu-Ala-Asp) box polypeptide 59 [Source:HGNC Symbol;Acc:25360]	protein_coding
chr1-:200938656-200938718	CACAUCA no UGAUGU hsa-miR-499-3p(6mer) ebv-miR-BART4*(6mer)	0.3347	1	ENSG00000116852	ENST00000332129	3'UTR	5.24187	0	91.9411	74	131.402	110.941	10.0628	6.42735					KIF21B	kinesin family member 21B [Source:HGNC Symbol;Acc:29442]	protein_coding
chr1-:201434650-201434695	AAAUGCU no AGCAUUU ebv-miR-BART14(7mer-m8)	0.0776	0.8704	ENSG00000174307	ENST00000367311	3'UTR	0	0	0	0	20.5811	15.1974	3.35426	0					PHLDA3	pleckstrin homology-like domain, family A, member 3 [Source:HGNC Symbol;Acc:8934]	protein_coding
chr1-:201452709-201452764	UAGUGUU weakly AACACUA kshv-miR-K12-10a(7mer-A1) hsa-miR-4255(7mer-A1)	0.0064	0.7333	ENSG00000159176	ENST00000367306	3'UTR	10.4837	12.2003	6.56722	14	0	0	0	0					CSRP1	cysteine and glycine-rich protein 1 [Source:HGNC Symbol;Acc:2469]	protein_coding
chr1-:201453692-201453775	UGGCAGG weakly CCUGCCA hsa-miR-1207-5p(7mer-A1)	0.6782	0.4807	ENSG00000159176	ENST00000367306	3'UTR	5.24187	8.13354	8.7563	20	0	0	0	0					CSRP1	cysteine and glycine-rich protein 1 [Source:HGNC Symbol;Acc:2469]	protein_coding
chr1-:202102729-202102766	NA	0	0	ENSG00000143862	ENST00000272217	3'UTR	5.24187	0	0	1	0	0	0	0					ARL8A	ADP-ribosylation factor-like 8A [Source:HGNC Symbol;Acc:25192]	protein_coding
chr1-:202102736-202102823	UGUGCAA vertebrate UUGCACA hsa-miR-19a(7mer-A1) hsa-miR-19b(7mer-A1)	0.0044	0.7116	ENSG00000143862	ENST00000272217	3'UTR	15.7256	4.06677	0	0	1.58316	0	3.35426	0					ARL8A	ADP-ribosylation factor-like 8A [Source:HGNC Symbol;Acc:25192]	protein_coding
chr1-:202103133-202103200	UGCAGCA vertebrate UGCUGCA hsa-miR-103(7mer-A1) hsa-miR-107(7mer-A1)	0.758	1	ENSG00000143862	ENST00000272217	3'UTR	52.4187	52.868	10.9454	12	66.4927	72.9476	13.4171	32.1367					ARL8A	ADP-ribosylation factor-like 8A [Source:HGNC Symbol;Acc:25192]	protein_coding
chr1-:202103245-202103304	AGUGUUG no CAACACU kshv-miR-K12-10a(7mer-m8)	0.87	0.7396	ENSG00000143862	ENST00000272217	3'UTR	5.24187	4.06677	78.8067	81	6.33264	6.07896	40.2512	35.3504					ARL8A	ADP-ribosylation factor-like 8A [Source:HGNC Symbol;Acc:25192]	protein_coding
chr1-:202116144-202116181	CAUCCAA no	0.8026	1	ENSG00000143851	ENST00000309017	3'UTR	47.1769	28.4674	0	0	0	0	0	0					PTPN7	protein tyrosine phosphatase, non-receptor type 7 [Source:HGNC Symbol;Acc:9659]	protein_coding
chr1-:202302384-202302452	AGCAGCU weakly AGCUGCU hsa-miR-646(7mer-m8)	0.9128	1	ENSG00000077152	ENST00000367274	CDS	0	28.4674	15.3235	5	28.4969	22.7961	10.0628	19.282					UBE2T	ubiquitin-conjugating enzyme E2T (putative) [Source:HGNC Symbol;Acc:25009]	protein_coding
[truncated: 15,080 more rows]

## Sheet: S2
Supplementary Table S2:
[truncated: 23,813 more rows]

## Sheet: S3
Supplementary Table S3:
[truncated: 120 more rows]

## Sheet: S4
Supplementary Table S4:
[truncated: 10 more rows]

## Sheet: S5
Supplementary Table S5:
[truncated: 23 more rows]

## Sheet: S6
Supplementary Table S6
[truncated: 10 more rows]
